# Supplementary material
Source: publisher figshare collection journal article supplement (https://acs.figshare.com/ndownloader/files/9364627)
Supplement: Supplementary file 1 [file 9364627]

data_mo_d090715_1_1_0m
_audit_creation_date              2015-07-13
_audit_creation_method
;
Olex2 1.2
(compiled 2015.01.26 svn.r3150 for OlexSys, GUI svn.r4998)
;
_shelxl_version_number            2014/6
_publ_contact_author_address      ?
_publ_contact_author_email        ?
_publ_contact_author_name         ''
_publ_contact_author_phone        ?
_publ_section_acknowledgements
;
X-Ray services provided by SMoCC - The Small Molecule Crystallography
Center of ETH Zurich. 
;
_publ_section_references
;
Dolomanov, O.V., Bourhis, L.J., Gildea, R.J, Howard, J.A.K. & Puschmann, H.
 (2009), J. Appl. Cryst. 42, 339-341.

Sheldrick, G.M. (2008). Acta Cryst. A64, 112-122.

Sheldrick, G.M. (2015). Acta Cryst. A71, 3-8.
;
_chemical_name_common             ?
_chemical_name_systematic         ?
_chemical_formula_moiety          'C44 H50 N2 Si4'
_chemical_formula_sum             'C44 H50 N2 Si4'
_chemical_formula_weight          719.22
_chemical_melting_point           ?
loop_
  _atom_type_symbol
  _atom_type_description
  _atom_type_scat_dispersion_real
  _atom_type_scat_dispersion_imag
  _atom_type_scat_source
 'C' 'C' 0.0033 0.0016 'International Tables Vol C Tables 4.2.6.8 and 6.1.1.4'
 'H' 'H' 0.0000 0.0000 'International Tables Vol C Tables 4.2.6.8 and 6.1.1.4'
 'N' 'N' 0.0061 0.0033 'International Tables Vol C Tables 4.2.6.8 and 6.1.1.4'
 'Si' 'Si' 0.0817 0.0704 'International Tables Vol C Tables 4.2.6.8 and 6.1.1.4'

_shelx_space_group_comment
;
The symmetry employed for this shelxl refinement is uniquely defined
by the following loop, which should always be used as a source of
symmetry information in preference to the above space-group names.
They are only intended as comments.
;
_space_group_crystal_system       'monoclinic'
_space_group_IT_number            14
_space_group_name_H-M_alt         'P 1 21/c 1'
_space_group_name_Hall            '-P 2ybc'
loop_
  _space_group_symop_operation_xyz
 'x, y, z'
 '-x, y+1/2, -z+1/2'
 '-x, -y, -z'
 'x, -y-1/2, z-1/2'

_cell_length_a                    17.957(3)
_cell_length_b                    5.9124(9)
_cell_length_c                    22.486(3)
_cell_angle_alpha                 90
_cell_angle_beta                  122.636(9)
_cell_angle_gamma                 90
_cell_volume                      2010.4(6)
_cell_formula_units_Z             2
_cell_measurement_reflns_used     1655
_cell_measurement_temperature     100.0(2)
_cell_measurement_theta_max       21.29
_cell_measurement_theta_min       2.37
_shelx_estimated_absorpt_T_max    ?
_shelx_estimated_absorpt_T_min    ?
_exptl_absorpt_coefficient_mu     0.181
_exptl_absorpt_correction_T_max   0.7452
_exptl_absorpt_correction_T_min   0.6598
_exptl_absorpt_correction_type    multi-scan
_exptl_absorpt_process_details
;
SADABS-2014/5 (Bruker,2014/5) was used for absorption correction.
wR2(int) was 0.0625 before and 0.0494 after correction.
The Ratio of minimum to maximum transmission is 0.8854.
The \l/2 correction factor is 0.00150.
;
_exptl_absorpt_special_details    ?
_exptl_crystal_colour             'clear dark red'
_exptl_crystal_colour_lustre      clear
_exptl_crystal_colour_modifier    dark
_exptl_crystal_colour_primary     red
_exptl_crystal_density_diffrn     1.188
_exptl_crystal_density_meas       ?
_exptl_crystal_density_method     ?
_exptl_crystal_description        plate
_exptl_crystal_F_000              768
_exptl_crystal_preparation        ?
_exptl_crystal_recrystallization_method ?
_exptl_crystal_size_max           0.21
_exptl_crystal_size_mid           0.15
_exptl_crystal_size_min           0.02
_exptl_transmission_factor_max    ?
_exptl_transmission_factor_min    ?
_diffrn_reflns_av_R_equivalents   0.0956
_diffrn_reflns_av_unetI/netI      0.0976
_diffrn_reflns_Laue_measured_fraction_full 0.907
_diffrn_reflns_Laue_measured_fraction_max 1.000
_diffrn_reflns_limit_h_max        20
_diffrn_reflns_limit_h_min        -20
_diffrn_reflns_limit_k_max        6
_diffrn_reflns_limit_k_min        -4
_diffrn_reflns_limit_l_max        26
_diffrn_reflns_limit_l_min        -26
_diffrn_reflns_number             14462
_diffrn_reflns_point_group_measured_fraction_full 0.907
_diffrn_reflns_point_group_measured_fraction_max 1.000
_diffrn_reflns_theta_full         25.242
_diffrn_reflns_theta_max          24.406
_diffrn_reflns_theta_min          1.821
_diffrn_ambient_temperature       100.0(2)
_diffrn_detector                  'Bruker APEX2 area detector'
_diffrn_detector_area_resol_mean  8.33
_diffrn_detector_type             'CCD area detector'
_diffrn_measured_fraction_theta_full 0.907
_diffrn_measured_fraction_theta_max 1.000
_diffrn_measurement_device        'kappa-stage diffractometer'
_diffrn_measurement_device_type   'Bruker APEX-II CCD'
_diffrn_measurement_method        '\w and \f scans'
_diffrn_radiation_monochromator   'focusing graphite'
_diffrn_radiation_probe           x-ray
_diffrn_radiation_type            MoK\a
_diffrn_radiation_wavelength      0.71073
_diffrn_source                    'sealed tube'
_diffrn_special_details           ?
_diffrn_standards_number          0
_reflns_Friedel_coverage          0.000
_reflns_Friedel_fraction_full     .
_reflns_Friedel_fraction_max      .
_reflns_number_gt                 1998
_reflns_number_total              3295
_reflns_special_details
;
 Reflections were merged by SHELXL according to the crystal
 class for the calculation of statistics and refinement.
 
 _reflns_Friedel_fraction is defined as the number of unique
 Friedel pairs measured divided by the number that would be
 possible theoretically, ignoring centric projections and
 systematic absences.
;
_reflns_threshold_expression      'I > 2\s(I)'
_computing_cell_refinement        'Bruker SAINT'
_computing_data_collection        'Bruker APEX2'
_computing_data_reduction         'Bruker SAINT'
_computing_molecular_graphics     'Olex2 (Dolomanov et al., 2009)'
_computing_publication_material   'Olex2 (Dolomanov et al., 2009)'
_computing_structure_refinement   'XL (Sheldrick, 2008)'
_computing_structure_solution     'XT (Sheldrick, 2015)'
_refine_diff_density_max          0.480
_refine_diff_density_min          -0.483
_refine_diff_density_rms          0.070
_refine_ls_extinction_coef        .
_refine_ls_extinction_method      none
_refine_ls_goodness_of_fit_ref    1.021
_refine_ls_hydrogen_treatment     constr
_refine_ls_matrix_type            full
_refine_ls_number_parameters      236
_refine_ls_number_reflns          3295
_refine_ls_number_restraints      62
_refine_ls_R_factor_all           0.1268
_refine_ls_R_factor_gt            0.0648
_refine_ls_restrained_S_all       1.014
_refine_ls_shift/su_max           0.000
_refine_ls_shift/su_mean          0.000
_refine_ls_structure_factor_coef  Fsqd
_refine_ls_weighting_details
'w=1/[\s^2^(Fo^2^)+(0.0724P)^2^+1.9217P] where P=(Fo^2^+2Fc^2^)/3'
_refine_ls_weighting_scheme       calc
_refine_ls_wR_factor_gt           0.1390
_refine_ls_wR_factor_ref          0.1636
_refine_special_details
'N1 disordered over 2 positions. Resolution substandard due to poor crystal quality.'
# start Validation Reply Form
_vrf_PLAT018_mo_d090715_1_1_0m
;
PROBLEM: _diffrn_measured_fraction_theta_max .NE. _full ! Check
RESPONSE: Very weakly diffracting, low-quality crystals. Resolution was cropped at 0.86 Angstrom. Observed fraction at theta max is still > 90%.
;
# end Validation Reply Form
_olex2_refinement_description
;
1. Fixed Uiso
 At 1.2 times of:
  All C(H) groups
 At 1.5 times of:
  All C(H,H,H) groups
2. Restrained distances
 N1-C17 \\sim N1A-C17
 with sigma of 0.02
 N1-C6 \\sim N1A-C6
 with sigma of 0.02
3. Rigid bond restraints
 N1, C6, C17, N1A
 with sigma for 1-2 distances of 0.01 and sigma for 1-3 distances of 0.01
 C8, Si2, C19, C22, C16
 with sigma for 1-2 distances of 0.01 and sigma for 1-3 distances of 0.01
4. Uiso/Uaniso restraints and constraints
Uanis(N1) = Uanis(N1A)
5. Rigid body (RIGU) restrains
 N1, C6, C17, N1A
 with sigma for 1-2 distances of 0.004 and sigma for 1-3 distances of 0.004
 C8, Si2, C19, C22, C16
 with sigma for 1-2 distances of 0.004 and sigma for 1-3 distances of 0.004
6. Others
 Sof(N1A)=1-FVAR(1)
 Sof(N1)=FVAR(1)
7.a Aromatic/amide H refined with riding coordinates:
 C4(H4), C7(H7), C9(H9), C10(H10), C11(H11), C14(H14), C15(H15)
7.b Idealised Me refined as rotating group:
 C16(H16A,H16B,H16C), C18(H18A,H18B,H18C), C19(H19A,H19B,H19C), C20(H20A,H20B,
 H20C), C21(H21A,H21B,H21C), C22(H22A,H22B,H22C)
;
_atom_sites_solution_hydrogens    geom
_atom_sites_solution_primary      direct
_atom_sites_solution_secondary    ?
loop_
  _atom_site_label
  _atom_site_type_symbol
  _atom_site_fract_x
  _atom_site_fract_y
  _atom_site_fract_z
  _atom_site_U_iso_or_equiv
  _atom_site_adp_type
  _atom_site_occupancy
  _atom_site_site_symmetry_order
  _atom_site_calc_flag
  _atom_site_refinement_flags_posn
  _atom_site_refinement_flags_adp
  _atom_site_refinement_flags_occupancy
  _atom_site_disorder_assembly
  _atom_site_disorder_group
 Si1 Si 0.55009(7) -0.5313(2) 0.88734(6) 0.0270(4) Uani 1 1 d . . . . .
 Si2 Si 0.82989(7) 0.5987(2) 0.69552(6) 0.0292(4) Uani 1 1 d . U . . .
 N1 N 1.139(2) 0.496(9) 0.960(3) 0.040(4) Uani 0.21(6) 1 d D U P A 1
 C1 C 0.7995(2) -0.1680(7) 0.9158(2) 0.0212(10) Uani 1 1 d . . . . .
 C2 C 0.9417(2) 0.2387(7) 0.8875(2) 0.0213(10) Uani 1 1 d . . . . .
 C3 C 0.8707(2) 0.0962(7) 0.8755(2) 0.0209(10) Uani 1 1 d . . . . .
 C4 C 0.7670(2) -0.3587(7) 0.8750(2) 0.0247(10) Uani 1 1 d . . . . .
 H4 H 0.7949 -0.4164 0.8535 0.030 Uiso 1 1 calc R . . . .
 C5 C 0.9636(2) -0.0716(7) 0.9936(2) 0.0196(10) Uani 1 1 d . . . . .
 C6 C 1.0224(2) 0.2285(7) 0.9537(2) 0.0230(10) Uani 1 1 d D U . . .
 C7 C 0.7888(2) 0.1131(8) 0.8078(2) 0.0252(11) Uani 1 1 d . . . . .
 H7 H 0.7408 0.0247 0.7985 0.030 Uiso 1 1 calc R . . . .
 C8 C 0.8499(2) 0.4021(7) 0.7684(2) 0.0225(10) Uani 1 1 d . U . . .
 C9 C 0.7554(3) -0.0779(8) 0.9454(2) 0.0269(11) Uani 1 1 d . . . . .
 H9 H 0.7752 0.0551 0.9715 0.032 Uiso 1 1 calc R . . . .
 C10 C 0.9283(2) 0.3926(7) 0.8334(2) 0.0253(10) Uani 1 1 d . . . . .
 H10 H 0.9740 0.4894 0.8423 0.030 Uiso 1 1 calc R . . . .
 C11 C 0.6811(3) -0.1880(7) 0.9357(2) 0.0273(11) Uani 1 1 d . . . . .
 H11 H 0.6525 -0.1274 0.9563 0.033 Uiso 1 1 calc R . . . .
 C12 C 0.6483(2) -0.3843(7) 0.8964(2) 0.0230(10) Uani 1 1 d . . . . .
 C13 C 0.8799(2) -0.0476(7) 0.9277(2) 0.0219(10) Uani 1 1 d . . . . .
 C14 C 0.7807(2) 0.2549(7) 0.7578(2) 0.0262(11) Uani 1 1 d . . . . .
 H14 H 0.7274 0.2570 0.7142 0.031 Uiso 1 1 calc R . . . .
 C15 C 0.6920(2) -0.4672(8) 0.8654(2) 0.0266(11) Uani 1 1 d . . . . .
 H15 H 0.6711 -0.5972 0.8378 0.032 Uiso 1 1 calc R . . . .
 C16 C 0.9137(3) 0.8249(8) 0.7309(2) 0.0349(12) Uani 1 1 d . U . . .
 H16A H 0.9135 0.9018 0.7684 0.052 Uiso 1 1 calc GR . . . .
 H16B H 0.9003 0.9305 0.6939 0.052 Uiso 1 1 calc GR . . . .
 H16C H 0.9710 0.7602 0.7487 0.052 Uiso 1 1 calc GR . . . .
 C17 C 1.0855(3) 0.3985(8) 0.9644(2) 0.0318(11) Uani 1 1 d D U . . .
 C18 C 0.5827(3) -0.6627(8) 0.9731(2) 0.0349(12) Uani 1 1 d . . . . .
 H18A H 0.6344 -0.7541 0.9896 0.052 Uiso 1 1 calc GR . . . .
 H18B H 0.5352 -0.7556 0.9670 0.052 Uiso 1 1 calc GR . . . .
 H18C H 0.5952 -0.5463 1.0071 0.052 Uiso 1 1 calc GR . . . .
 C19 C 0.7140(2) 0.7108(8) 0.6517(2) 0.0391(13) Uani 1 1 d . U . . .
 H19A H 0.6728 0.5930 0.6242 0.059 Uiso 1 1 calc GR . . . .
 H19B H 0.7066 0.8348 0.6214 0.059 Uiso 1 1 calc GR . . . .
 H19C H 0.7035 0.7619 0.6871 0.059 Uiso 1 1 calc GR . . . .
 C20 C 0.5059(3) -0.7424(8) 0.8150(2) 0.0375(13) Uani 1 1 d . . . . .
 H20A H 0.4914 -0.6686 0.7720 0.056 Uiso 1 1 calc GR . . . .
 H20B H 0.4538 -0.8110 0.8089 0.056 Uiso 1 1 calc GR . . . .
 H20C H 0.5497 -0.8567 0.8267 0.056 Uiso 1 1 calc GR . . . .
 C21 C 0.4622(3) -0.3194(8) 0.8655(3) 0.0420(14) Uani 1 1 d . . . . .
 H21A H 0.4863 -0.1996 0.8997 0.063 Uiso 1 1 calc GR . . . .
 H21B H 0.4147 -0.3910 0.8662 0.063 Uiso 1 1 calc GR . . . .
 H21C H 0.4403 -0.2583 0.8194 0.063 Uiso 1 1 calc GR . . . .
 C22 C 0.8358(3) 0.4393(9) 0.6275(2) 0.0476(14) Uani 1 1 d . U . . .
 H22A H 0.8931 0.3711 0.6485 0.071 Uiso 1 1 calc GR . . . .
 H22B H 0.8260 0.5405 0.5906 0.071 Uiso 1 1 calc GR . . . .
 H22C H 0.7913 0.3235 0.6082 0.071 Uiso 1 1 calc GR . . . .
 N1A N 1.1243(10) 0.558(3) 0.9672(7) 0.040(4) Uani 0.79(6) 1 d D U P A 2

loop_
  _atom_site_aniso_label
  _atom_site_aniso_U_11
  _atom_site_aniso_U_22
  _atom_site_aniso_U_33
  _atom_site_aniso_U_23
  _atom_site_aniso_U_13
  _atom_site_aniso_U_12
 Si1 0.0108(5) 0.0300(8) 0.0293(7) 0.0007(6) 0.0038(5) -0.0058(5)
 Si2 0.0167(6) 0.0341(8) 0.0248(7) 0.0062(6) 0.0033(5) 0.0030(6)
 N1 0.017(4) 0.043(5) 0.034(3) 0.016(4) -0.003(3) -0.004(4)
 C1 0.0086(18) 0.027(3) 0.019(2) 0.004(2) 0.0013(17) -0.0018(19)
 C2 0.0111(19) 0.026(3) 0.022(2) 0.001(2) 0.0058(18) 0.0004(18)
 C3 0.0115(19) 0.024(2) 0.020(2) 0.002(2) 0.0041(18) 0.0003(18)
 C4 0.014(2) 0.029(3) 0.026(2) -0.001(2) 0.0084(19) -0.002(2)
 C5 0.0103(18) 0.021(3) 0.021(2) -0.0018(19) 0.0045(17) -0.0035(18)
 C6 0.0121(19) 0.024(2) 0.022(2) 0.0003(19) 0.0024(18) -0.0010(18)
 C7 0.0097(19) 0.032(3) 0.022(2) -0.002(2) 0.0010(18) -0.0061(19)
 C8 0.014(2) 0.024(2) 0.021(2) -0.0002(19) 0.0042(18) 0.0022(18)
 C9 0.021(2) 0.027(3) 0.022(2) -0.005(2) 0.0048(19) -0.005(2)
 C10 0.016(2) 0.026(3) 0.028(3) 0.000(2) 0.0079(19) -0.0012(19)
 C11 0.020(2) 0.027(3) 0.033(3) -0.003(2) 0.013(2) -0.003(2)
 C12 0.0126(19) 0.024(3) 0.020(2) -0.003(2) 0.0005(18) -0.0025(19)
 C13 0.0122(19) 0.026(3) 0.020(2) -0.003(2) 0.0037(17) -0.0032(19)
 C14 0.013(2) 0.033(3) 0.019(2) 0.000(2) 0.0003(18) -0.002(2)
 C15 0.015(2) 0.028(3) 0.023(2) -0.005(2) 0.0017(19) -0.008(2)
 C16 0.021(2) 0.037(3) 0.042(3) 0.010(2) 0.014(2) 0.005(2)
 C17 0.016(2) 0.039(3) 0.020(2) 0.012(2) -0.0032(18) -0.004(2)
 C18 0.032(2) 0.031(3) 0.039(3) -0.005(2) 0.017(2) -0.006(2)
 C19 0.014(2) 0.039(3) 0.050(3) 0.022(2) 0.008(2) 0.013(2)
 C20 0.028(2) 0.045(3) 0.031(3) -0.002(2) 0.011(2) -0.018(2)
 C21 0.017(2) 0.042(3) 0.057(3) 0.009(3) 0.013(2) -0.002(2)
 C22 0.045(3) 0.060(4) 0.025(3) 0.007(2) 0.010(2) 0.010(3)
 N1A 0.017(4) 0.043(5) 0.034(3) 0.016(4) -0.003(3) -0.004(4)

_geom_special_details
;
 All esds (except the esd in the dihedral angle between two l.s. planes)
 are estimated using the full covariance matrix.  The cell esds are taken
 into account individually in the estimation of esds in distances, angles
 and torsion angles; correlations between esds in cell parameters are only
 used when they are defined by crystal symmetry.  An approximate (isotropic)
 treatment of cell esds is used for estimating esds involving l.s. planes.
;
loop_
  _geom_bond_atom_site_label_1
  _geom_bond_atom_site_label_2
  _geom_bond_distance
  _geom_bond_site_symmetry_2
  _geom_bond_publ_flag
 Si1 C12 1.876(4) . ?
 Si1 C18 1.857(5) . ?
 Si1 C20 1.855(5) . ?
 Si1 C21 1.862(5) . ?
 Si2 C8 1.879(4) . ?
 Si2 C16 1.843(4) . ?
 Si2 C19 1.878(4) . ?
 Si2 C22 1.847(5) . ?
 N1 C17 1.166(14) . ?
 C1 C4 1.370(6) . ?
 C1 C9 1.386(6) . ?
 C1 C13 1.498(5) . ?
 C2 C3 1.426(5) . ?
 C2 C6 1.412(5) . ?
 C2 C10 1.432(6) . ?
 C3 C7 1.441(5) . ?
 C3 C13 1.386(6) . ?
 C4 H4 0.9300 . ?
 C4 C15 1.398(5) . ?
 C5 C5 1.450(7) 3_757 ?
 C5 C6 1.417(6) 3_757 ?
 C5 C13 1.439(5) . ?
 C6 C5 1.417(6) 3_757 ?
 C6 C17 1.435(6) . ?
 C7 H7 0.9300 . ?
 C7 C14 1.346(6) . ?
 C8 C10 1.379(5) . ?
 C8 C14 1.428(6) . ?
 C9 H9 0.9300 . ?
 C9 C11 1.391(6) . ?
 C10 H10 0.9300 . ?
 C11 H11 0.9300 . ?
 C11 C12 1.383(6) . ?
 C12 C15 1.391(6) . ?
 C14 H14 0.9300 . ?
 C15 H15 0.9300 . ?
 C16 H16A 0.9600 . ?
 C16 H16B 0.9600 . ?
 C16 H16C 0.9600 . ?
 C17 N1A 1.154(7) . ?
 C18 H18A 0.9600 . ?
 C18 H18B 0.9600 . ?
 C18 H18C 0.9600 . ?
 C19 H19A 0.9600 . ?
 C19 H19B 0.9600 . ?
 C19 H19C 0.9600 . ?
 C20 H20A 0.9600 . ?
 C20 H20B 0.9600 . ?
 C20 H20C 0.9600 . ?
 C21 H21A 0.9600 . ?
 C21 H21B 0.9600 . ?
 C21 H21C 0.9600 . ?
 C22 H22A 0.9600 . ?
 C22 H22B 0.9600 . ?
 C22 H22C 0.9600 . ?

loop_
  _geom_angle_atom_site_label_1
  _geom_angle_atom_site_label_2
  _geom_angle_atom_site_label_3
  _geom_angle
  _geom_angle_site_symmetry_1
  _geom_angle_site_symmetry_3
  _geom_angle_publ_flag
 C18 Si1 C12 109.25(19) . . ?
 C18 Si1 C21 107.6(2) . . ?
 C20 Si1 C12 109.9(2) . . ?
 C20 Si1 C18 112.1(2) . . ?
 C20 Si1 C21 108.7(2) . . ?
 C21 Si1 C12 109.3(2) . . ?
 C16 Si2 C8 110.2(2) . . ?
 C16 Si2 C19 112.7(2) . . ?
 C16 Si2 C22 109.2(2) . . ?
 C19 Si2 C8 108.21(19) . . ?
 C22 Si2 C8 109.7(2) . . ?
 C22 Si2 C19 106.7(2) . . ?
 C4 C1 C9 119.4(4) . . ?
 C4 C1 C13 122.1(4) . . ?
 C9 C1 C13 118.5(4) . . ?
 C3 C2 C10 119.4(3) . . ?
 C6 C2 C3 118.6(4) . . ?
 C6 C2 C10 122.0(4) . . ?
 C2 C3 C7 117.2(4) . . ?
 C13 C3 C2 121.1(3) . . ?
 C13 C3 C7 121.6(4) . . ?
 C1 C4 H4 119.7 . . ?
 C1 C4 C15 120.5(4) . . ?
 C15 C4 H4 119.7 . . ?
 C6 C5 C5 118.8(4) 3_757 3_757 ?
 C6 C5 C13 122.7(4) 3_757 . ?
 C13 C5 C5 118.5(5) . 3_757 ?
 C2 C6 C5 121.9(4) . 3_757 ?
 C2 C6 C17 114.5(4) . . ?
 C5 C6 C17 123.5(3) 3_757 . ?
 C3 C7 H7 119.5 . . ?
 C14 C7 C3 121.0(4) . . ?
 C14 C7 H7 119.5 . . ?
 C10 C8 Si2 123.7(3) . . ?
 C10 C8 C14 116.8(4) . . ?
 C14 C8 Si2 119.5(3) . . ?
 C1 C9 H9 120.3 . . ?
 C1 C9 C11 119.5(4) . . ?
 C11 C9 H9 120.3 . . ?
 C2 C10 H10 118.9 . . ?
 C8 C10 C2 122.3(4) . . ?
 C8 C10 H10 118.9 . . ?
 C9 C11 H11 118.8 . . ?
 C12 C11 C9 122.4(4) . . ?
 C12 C11 H11 118.8 . . ?
 C11 C12 Si1 120.7(3) . . ?
 C11 C12 C15 117.0(4) . . ?
 C15 C12 Si1 122.3(3) . . ?
 C3 C13 C1 118.5(3) . . ?
 C3 C13 C5 120.8(4) . . ?
 C5 C13 C1 120.5(4) . . ?
 C7 C14 C8 123.2(4) . . ?
 C7 C14 H14 118.4 . . ?
 C8 C14 H14 118.4 . . ?
 C4 C15 H15 119.4 . . ?
 C12 C15 C4 121.2(4) . . ?
 C12 C15 H15 119.4 . . ?
 Si2 C16 H16A 109.5 . . ?
 Si2 C16 H16B 109.5 . . ?
 Si2 C16 H16C 109.5 . . ?
 H16A C16 H16B 109.5 . . ?
 H16A C16 H16C 109.5 . . ?
 H16B C16 H16C 109.5 . . ?
 N1 C17 C6 161(3) . . ?
 N1A C17 C6 168.8(12) . . ?
 Si1 C18 H18A 109.5 . . ?
 Si1 C18 H18B 109.5 . . ?
 Si1 C18 H18C 109.5 . . ?
 H18A C18 H18B 109.5 . . ?
 H18A C18 H18C 109.5 . . ?
 H18B C18 H18C 109.5 . . ?
 Si2 C19 H19A 109.5 . . ?
 Si2 C19 H19B 109.5 . . ?
 Si2 C19 H19C 109.5 . . ?
 H19A C19 H19B 109.5 . . ?
 H19A C19 H19C 109.5 . . ?
 H19B C19 H19C 109.5 . . ?
 Si1 C20 H20A 109.5 . . ?
 Si1 C20 H20B 109.5 . . ?
 Si1 C20 H20C 109.5 . . ?
 H20A C20 H20B 109.5 . . ?
 H20A C20 H20C 109.5 . . ?
 H20B C20 H20C 109.5 . . ?
 Si1 C21 H21A 109.5 . . ?
 Si1 C21 H21B 109.5 . . ?
 Si1 C21 H21C 109.5 . . ?
 H21A C21 H21B 109.5 . . ?
 H21A C21 H21C 109.5 . . ?
 H21B C21 H21C 109.5 . . ?
 Si2 C22 H22A 109.5 . . ?
 Si2 C22 H22B 109.5 . . ?
 Si2 C22 H22C 109.5 . . ?
 H22A C22 H22B 109.5 . . ?
 H22A C22 H22C 109.5 . . ?
 H22B C22 H22C 109.5 . . ?

loop_
  _geom_torsion_atom_site_label_1
  _geom_torsion_atom_site_label_2
  _geom_torsion_atom_site_label_3
  _geom_torsion_atom_site_label_4
  _geom_torsion
  _geom_torsion_site_symmetry_1
  _geom_torsion_site_symmetry_2
  _geom_torsion_site_symmetry_3
  _geom_torsion_site_symmetry_4
  _geom_torsion_publ_flag
 Si1 C12 C15 C4 -177.8(3) . . . . ?
 Si2 C8 C10 C2 -179.3(3) . . . . ?
 Si2 C8 C14 C7 -178.3(4) . . . . ?
 C1 C4 C15 C12 0.5(6) . . . . ?
 C1 C9 C11 C12 -1.0(6) . . . . ?
 C2 C3 C7 C14 1.2(6) . . . . ?
 C2 C3 C13 C1 171.3(4) . . . . ?
 C2 C3 C13 C5 -5.3(6) . . . . ?
 C2 C6 C17 N1 -76(8) . . . . ?
 C2 C6 C17 N1A 39(6) . . . . ?
 C3 C2 C6 C5 4.0(6) . . . 3_757 ?
 C3 C2 C6 C17 -171.9(4) . . . . ?
 C3 C2 C10 C8 -2.7(6) . . . . ?
 C3 C7 C14 C8 -2.2(7) . . . . ?
 C4 C1 C9 C11 2.8(6) . . . . ?
 C4 C1 C13 C3 80.0(5) . . . . ?
 C4 C1 C13 C5 -103.4(5) . . . . ?
 C5 C5 C13 C1 -171.6(4) 3_757 . . . ?
 C5 C5 C13 C3 4.9(7) 3_757 . . . ?
 C5 C6 C17 N1 108(8) 3_757 . . . ?
 C5 C6 C17 N1A -137(6) 3_757 . . . ?
 C6 C2 C3 C7 179.1(4) . . . . ?
 C6 C2 C3 C13 0.8(6) . . . . ?
 C6 C2 C10 C8 179.4(4) . . . . ?
 C6 C5 C13 C1 8.2(6) 3_757 . . . ?
 C6 C5 C13 C3 -175.3(4) 3_757 . . . ?
 C7 C3 C13 C1 -6.9(6) . . . . ?
 C7 C3 C13 C5 176.5(4) . . . . ?
 C9 C1 C4 C15 -2.6(6) . . . . ?
 C9 C1 C13 C3 -97.9(5) . . . . ?
 C9 C1 C13 C5 78.8(5) . . . . ?
 C9 C11 C12 Si1 178.0(3) . . . . ?
 C9 C11 C12 C15 -1.1(6) . . . . ?
 C10 C2 C3 C7 1.2(6) . . . . ?
 C10 C2 C3 C13 -177.1(4) . . . . ?
 C10 C2 C6 C5 -178.1(4) . . . 3_757 ?
 C10 C2 C6 C17 5.9(6) . . . . ?
 C10 C8 C14 C7 0.7(7) . . . . ?
 C11 C12 C15 C4 1.3(6) . . . . ?
 C13 C1 C4 C15 179.6(4) . . . . ?
 C13 C1 C9 C11 -179.3(4) . . . . ?
 C13 C3 C7 C14 179.5(4) . . . . ?
 C14 C8 C10 C2 1.8(6) . . . . ?
 C16 Si2 C8 C10 -16.4(4) . . . . ?
 C16 Si2 C8 C14 162.5(3) . . . . ?
 C18 Si1 C12 C11 -70.8(4) . . . . ?
 C18 Si1 C12 C15 108.3(4) . . . . ?
 C19 Si2 C8 C10 -140.1(4) . . . . ?
 C19 Si2 C8 C14 38.9(4) . . . . ?
 C20 Si1 C12 C11 165.9(3) . . . . ?
 C20 Si1 C12 C15 -15.0(4) . . . . ?
 C21 Si1 C12 C11 46.7(4) . . . . ?
 C21 Si1 C12 C15 -134.2(4) . . . . ?
 C22 Si2 C8 C10 103.9(4) . . . . ?
 C22 Si2 C8 C14 -77.2(4) . . . . ?

_shelx_res_file
;
TITL mo_d090715P 1 21/n 1 R = New: P21/c
CELL 0.71073 17.957 5.9124 22.486 90 122.636 90
ZERR 2 0.003 0.0009 0.003 0 0.009 0
LATT 1
SYMM -X,0.5+Y,0.5-Z
SFAC C H N Si
UNIT 88 100 4 8
SADI N1 C17 N1A C17
SADI N1 C6 N1A C6
DELU N1 C6 C17 N1A
DELU C8 Si2 C19 C22 C16
RIGU N1 C6 C17 N1A
RIGU C8 Si2 C19 C22 C16
EADP N1 N1A

L.S. 5
PLAN  -20
BOND $H
CONF
MORE -1
fmap 2
acta
REM <olex2.extras>
REM <HklSrc "%.\\mo_d090715_1_1_0m.hkl">
REM </olex2.extras>

WGHT    0.072400    1.921700
FVAR       0.56161   0.21105
SI1   4    0.550094   -0.531316    0.887338    11.00000    0.01083    0.03002 =
         0.02934    0.00069    0.00382   -0.00579
SI2   4    0.829889    0.598677    0.695522    11.00000    0.01666    0.03410 =
         0.02480    0.00618    0.00326    0.00305
PART 1
N1    3    1.139140    0.496178    0.960476    21.00000    0.01734    0.04277 =
         0.03407    0.01641   -0.00345   -0.00419
PART 0
C1    1    0.799487   -0.167975    0.915829    11.00000    0.00859    0.02744 =
         0.01854    0.00427    0.00133   -0.00184
C2    1    0.941662    0.238730    0.887494    11.00000    0.01106    0.02593 =
         0.02215    0.00056    0.00583    0.00045
C3    1    0.870746    0.096238    0.875507    11.00000    0.01153    0.02404 =
         0.02030    0.00188    0.00411    0.00030
C4    1    0.766965   -0.358691    0.874974    11.00000    0.01441    0.02941 =
         0.02641   -0.00093    0.00844   -0.00241
AFIX  43
H4    2    0.794931   -0.416386    0.853452    11.00000   -1.20000
AFIX   0
C5    1    0.963587   -0.071610    0.993559    11.00000    0.01033    0.02130 =
         0.02109   -0.00182    0.00450   -0.00346
C6    1    1.022400    0.228501    0.953733    11.00000    0.01211    0.02447 =
         0.02202    0.00034    0.00245   -0.00097
C7    1    0.788809    0.113068    0.807783    11.00000    0.00971    0.03174 =
         0.02238   -0.00157    0.00098   -0.00615
AFIX  43
H7    2    0.740830    0.024676    0.798492    11.00000   -1.20000
AFIX   0
C8    1    0.849888    0.402108    0.768384    11.00000    0.01410    0.02414 =
         0.02119   -0.00021    0.00422    0.00224
C9    1    0.755364   -0.077875    0.945385    11.00000    0.02146    0.02689 =
         0.02192   -0.00513    0.00479   -0.00539
AFIX  43
H9    2    0.775248    0.055139    0.971515    11.00000   -1.20000
AFIX   0
C10   1    0.928264    0.392592    0.833357    11.00000    0.01563    0.02596 =
         0.02827    0.00008    0.00786   -0.00116
AFIX  43
H10   2    0.974027    0.489446    0.842347    11.00000   -1.20000
AFIX   0
C11   1    0.681094   -0.187989    0.935655    11.00000    0.01972    0.02681 =
         0.03320   -0.00274    0.01292   -0.00296
AFIX  43
H11   2    0.652488   -0.127376    0.956297    11.00000   -1.20000
AFIX   0
C12   1    0.648270   -0.384256    0.896413    11.00000    0.01263    0.02427 =
         0.01966   -0.00263    0.00051   -0.00254
C13   1    0.879881   -0.047650    0.927729    11.00000    0.01221    0.02614 =
         0.01992   -0.00281    0.00370   -0.00321
C14   1    0.780718    0.254864    0.757784    11.00000    0.01313    0.03330 =
         0.01929    0.00020    0.00030   -0.00161
AFIX  43
H14   2    0.727443    0.257023    0.714185    11.00000   -1.20000
AFIX   0
C15   1    0.692045   -0.467224    0.865396    11.00000    0.01549    0.02774 =
         0.02323   -0.00543    0.00173   -0.00829
AFIX  43
H15   2    0.671104   -0.597166    0.837806    11.00000   -1.20000
AFIX   0
C16   1    0.913699    0.824906    0.730856    11.00000    0.02098    0.03691 =
         0.04240    0.01013    0.01422    0.00535
AFIX 137
H16A  2    0.913474    0.901844    0.768355    11.00000   -1.50000
H16B  2    0.900258    0.930528    0.693927    11.00000   -1.50000
H16C  2    0.971027    0.760207    0.748694    11.00000   -1.50000
AFIX   0
C17   1    1.085486    0.398523    0.964363    11.00000    0.01637    0.03878 =
         0.02033    0.01184   -0.00322   -0.00431
C18   1    0.582675   -0.662673    0.973104    11.00000    0.03226    0.03055 =
         0.03882   -0.00500    0.01719   -0.00644
AFIX 137
H18A  2    0.634424   -0.754084    0.989571    11.00000   -1.50000
H18B  2    0.535200   -0.755585    0.967029    11.00000   -1.50000
H18C  2    0.595246   -0.546263    1.007056    11.00000   -1.50000
AFIX   0
C19   1    0.714039    0.710775    0.651700    11.00000    0.01426    0.03868 =
         0.04991    0.02193    0.00786    0.01272
AFIX 137
H19A  2    0.672803    0.592969    0.624234    11.00000   -1.50000
H19B  2    0.706558    0.834793    0.621385    11.00000   -1.50000
H19C  2    0.703536    0.761864    0.687082    11.00000   -1.50000
AFIX   0
C20   1    0.505912   -0.742367    0.815003    11.00000    0.02805    0.04540 =
         0.03101   -0.00188    0.01064   -0.01800
AFIX 137
H20A  2    0.491393   -0.668630    0.771988    11.00000   -1.50000
H20B  2    0.453752   -0.811019    0.808862    11.00000   -1.50000
H20C  2    0.549722   -0.856688    0.826720    11.00000   -1.50000
AFIX   0
C21   1    0.462199   -0.319355    0.865527    11.00000    0.01652    0.04215 =
         0.05722    0.00894    0.01330   -0.00249
AFIX 137
H21A  2    0.486327   -0.199563    0.899736    11.00000   -1.50000
H21B  2    0.414693   -0.390964    0.866221    11.00000   -1.50000
H21C  2    0.440262   -0.258262    0.819377    11.00000   -1.50000
AFIX   0
C22   1    0.835757    0.439313    0.627528    11.00000    0.04495    0.05954 =
         0.02465    0.00748    0.00976    0.01024
AFIX 137
H22A  2    0.893098    0.371112    0.648464    11.00000   -1.50000
H22B  2    0.825972    0.540458    0.590570    11.00000   -1.50000
H22C  2    0.791252    0.323524    0.608203    11.00000   -1.50000
AFIX   0
PART 2
N1A   3    1.124296    0.558092    0.967181   -21.00000    0.01734    0.04277 =
         0.03407    0.01641   -0.00345   -0.00419
HKLF 4 1 1 0 0 0 -1 0 -1 0 -1

REM  mo_d090715P 1 21/n 1 R = New: P21/c
REM R1 =  0.0648 for    1998 Fo > 4sig(Fo)  and  0.1268 for all    3295 data
REM    236 parameters refined using     62 restraints

END

WGHT      0.0724      1.9217

REM Highest difference peak  0.480,  deepest hole -0.483,  1-sigma level  0.070
Q1    1   0.8731  0.6513  0.6587  11.00000  0.05    0.48
Q2    1   0.5444 -0.5760  0.9287  11.00000  0.05    0.39
Q3    1   0.4515 -0.7002  0.7833  11.00000  0.05    0.33
Q4    1   0.8307  0.7383  0.7310  11.00000  0.05    0.33
Q5    1   0.8235  0.5528  0.7397  11.00000  0.05    0.29
Q6    1   0.8378  0.8120  0.6947  11.00000  0.05    0.29
Q7    1   0.6956  0.6774  0.6095  11.00000  0.05    0.28
Q8    1   0.9436  0.3324  0.9261  11.00000  0.05    0.27
Q9    1   0.6083 -0.4096  0.8787  11.00000  0.05    0.27
Q10   1   0.7332 -0.0761  0.8389  11.00000  0.05    0.27
Q11   1   0.9009 -0.0974  0.8752  11.00000  0.05    0.26
Q12   1   0.7988  0.7909  0.6407  11.00000  0.05    0.26
Q13   1   0.5064 -0.6768  0.8522  11.00000  0.05    0.26
Q14   1   0.5067 -0.4127  0.9002  11.00000  0.05    0.25
Q15   1   0.8703  0.2492  0.9385  11.00000  0.05    0.24
Q16   1   0.7650 -0.0297  0.9040  11.00000  0.05    0.23
Q17   1   0.9451  0.2229  0.8528  11.00000  0.05    0.23
Q18   1   1.0408  0.0819  0.9699  11.00000  0.05    0.22
Q19   1   0.9235 -0.0559  0.9556  11.00000  0.05    0.22
Q20   1   0.9782  0.2486  0.9217  11.00000  0.05    0.22
;
_shelx_res_checksum               36109
_shelx_hkl_file
;
  -2   0   0  129.99    7.30
  -2   0   0  116.69    8.80
  -2   0   0  122.59    7.50
   2   0   0  127.99    7.30
  -3   0   0    8.10    9.40
  -3   0   0   -0.20    8.70
  -3   0   0   12.20    8.70
   3   0   0    4.10    9.50
  -4   0   0 1976.80   47.60
  -4   0   0 1902.31   47.90
   4   0   0 1843.52   47.90
  -5   0   0   -3.20   13.10
  -5   0   0    0.20   11.60
   5   0   0    6.80   13.70
  -6   0   0  139.99   15.30
  -6   0   0  129.49   14.20
   6   0   0  157.08   16.60
  -7   0   0   -5.00   15.00
  -7   0   0   25.00   13.90
   7   0   0   31.40   16.90
  -8   0   0  -19.20   15.10
  -8   0   0  -17.30   16.20
   8   0   0   -8.70   18.90
  -9   0   0   -9.20   16.30
  -9   0   0    9.60   16.00
   9   0   0   21.50   19.70
 -10   0   0   47.00   16.70
 -10   0   0   38.60   17.40
  10   0   0   28.70   20.20
 -11   0   0   27.60   17.70
 -11   0   0   -4.30   16.30
 -12   0   0   39.70   18.80
 -12   0   0   54.99   19.80
 -13   0   0  -31.90   19.40
 -13   0   0    7.50   19.50
  13   0   0  -28.20   21.10
 -14   0   0  153.48   23.90
 -14   0   0  155.48   23.70
  14   0   0  133.39   25.20
 -15   0   0   26.60   22.70
 -15   0   0   -2.10   23.00
 -16   0   0   55.79   24.20
 -16   0   0   67.19   25.30
 -17   0   0  -31.60   25.70
 -17   0   0    2.50   24.10
 -18   0   0   -1.10   26.80
 -18   0   0  -12.00   24.90
 -19   0   0   -8.50   25.40
 -19   0   0    6.10   28.70
 -19   1   0   88.89   33.30
 -18   1   0   15.60   30.40
 -17   1   0   -7.80   28.30
  16  -1   0  107.09   30.40
 -16   1   0   41.10   25.00
 -16   1   0   77.79   27.90
  15  -1   0  217.18   30.50
 -15   1   0  155.98   25.40
 -15   1   0  180.68   28.80
  14  -1   0  -41.80   24.40
 -14   1   0  -18.00   22.20
 -14   1   0   26.70   24.20
  13  -1   0  -45.60   22.50
 -13   1   0   12.20   21.40
 -13   1   0   -1.50   20.10
  12  -1   0  134.59   23.20
 -12   1   0  104.59   21.60
 -12   1   0  102.49   20.70
  11  -1   0  130.39   21.20
 -11   1   0  137.99   21.00
 -11   1   0   96.09   19.50
  10  -1   0  -22.60   18.10
 -10   1   0    3.90   17.10
 -10   1   0   12.40   17.80
   9  -1   0  240.68   22.10
  -9   1   0  255.87   20.90
  -9   1   0  287.57   21.20
   8  -1   0  107.19   19.30
  -8   1   0   97.39   18.80
  -8   1   0   91.79   17.60
   7  -1   0   30.50   17.00
  -7   1   0    5.70   16.70
  -7   1   0   52.39   16.10
   6  -1   0   77.09   16.00
  -6   1   0   74.29   15.40
  -6   1   0  105.69   15.20
   5  -1   0 1399.16   40.60
  -5   1   0 1380.86   39.20
  -5   1   0 1359.76   39.70
   4  -1   0  251.87   19.50
   4  -1   0  316.57   20.80
  -4   1   0  297.27   19.60
  -4   1   0  270.37   20.60
   3  -1   0 1642.74   41.70
   3  -1   0 1502.05   41.60
  -3   1   0 1552.34   41.00
  -3   1   0 1606.84   41.20
   2  -1   0 1469.85   37.70
   2  -1   0 1518.55   37.90
   2  -1   0 1399.86   36.70
  -2   1   0 1442.06   37.20
  -2   1   0 1412.96   37.10
   1  -1   0  225.78   13.30
   1  -1   0  204.98   13.80
   1  -1   0  251.07   13.80
  -1   1   0  244.48   12.90
   0  -1   0    4.20    7.50
   0  -1   0   -0.10    7.30
   0  -1   0  -10.50    6.80
   0   1   0    4.20    6.80
  -1  -1   0  185.88   10.30
  -1  -1   0  224.38    9.60
  -1  -1   0  157.28   10.80
  -2  -1   0 1476.45   34.30
  -2  -1   0 1452.25   34.80
  -2  -1   0 1457.75   34.20
  -2  -1   0 1342.67   34.60
  -3  -1   0 1526.95   37.30
  -3  -1   0 1489.35   37.80
  -3  -1   0 1555.94   37.50
  -4  -1   0  254.37   14.80
  -4  -1   0  240.58   14.80
  -4  -1   0  206.48   16.30
  -5  -1   0 1290.27   34.30
  -5  -1   0 1325.97   34.90
  -5  -1   0 1273.07   34.00
   5   1   0 1219.68   35.80
  -6  -1   0  110.79   13.90
  -6  -1   0  116.79   13.00
  -6  -1   0  111.79   11.90
   6   1   0   99.29   13.70
  -7  -1   0   49.40   14.10
  -7  -1   0   45.40   14.40
  -7  -1   0   47.20   12.50
   7   1   0   53.59   15.50
  -8  -1   0   87.49   15.20
  -8  -1   0   48.90   13.20
  -8  -1   0   62.19   15.40
   8   1   0   68.99   17.20
  -9  -1   0  287.67   19.00
  -9  -1   0  255.87   19.20
  -9  -1   0  259.47   20.80
   9   1   0  276.77   20.60
 -10  -1   0   -2.00   12.70
 -10  -1   0    4.30   15.50
 -10  -1   0   24.40   15.30
  10   1   0   12.10   18.70
 -11  -1   0  105.29   15.00
 -11  -1   0  118.29   18.30
 -11  -1   0  122.19   18.30
  11   1   0  141.29   20.90
 -12  -1   0  129.19   19.70
 -12  -1   0  105.99   16.20
 -12  -1   0  129.59   19.20
  12   1   0  189.28   23.40
 -13  -1   0  -20.60   19.40
 -13  -1   0   16.40   18.60
  13   1   0   32.60   24.60
 -14  -1   0   40.80   20.80
 -14  -1   0  -16.10   20.10
 -15  -1   0  169.08   24.50
 -15  -1   0  169.68   24.40
 -16  -1   0  101.49   24.70
 -16  -1   0   95.89   24.30
 -17  -1   0   18.00   24.80
 -17  -1   0    7.50   24.60
 -18  -1   0  -39.50   23.20
 -18  -1   0  -28.70   25.20
 -19  -1   0   74.09   28.20
 -19  -1   0   75.99   27.40
 -19   2   0   27.80   33.80
 -18   2   0  -20.70   31.40
  17  -2   0  -59.19   33.30
 -17   2   0  -35.00   29.50
  16  -2   0  116.09   32.80
 -16   2   0  208.08   33.50
  15  -2   0  -24.00   29.00
 -15   2   0   55.19   27.70
  14  -2   0   24.90   27.90
 -14   2   0   49.60   25.90
  13  -2   0  381.76   32.20
 -13   2   0  306.57   29.90
 -13   2   0  286.17   28.00
  12  -2   0   83.29   25.70
 -12   2   0   32.40   21.60
 -12   2   0   71.59   23.60
  11  -2   0   53.29   23.50
 -11   2   0  115.49   22.70
 -11   2   0   44.80   19.80
  10  -2   0  112.49   22.80
 -10   2   0  112.19   21.20
 -10   2   0  133.19   19.90
   9  -2   0  421.06   31.90
  -9   2   0  399.46   28.40
  -9   2   0  436.26   29.80
   8  -2   0   10.80   18.80
  -8   2   0   -5.50   16.90
  -8   2   0   -5.80   15.70
   7  -2   0  189.18   21.40
  -7   2   0  200.18   20.10
  -7   2   0  210.18   19.50
   6  -2   0 1645.94   49.99
   6  -2   0 1653.73   49.20
  -6   2   0 1594.84   47.70
  -6   2   0 1689.73   48.80
   5  -2   0  552.54   29.10
   5  -2   0  558.64   28.50
  -5   2   0  508.95   27.70
   4  -2   0  243.78   18.40
   4  -2   0  235.78   18.30
  -4   2   0  242.48   17.10
   3  -2   0   40.30   13.90
   3  -2   0   41.30   12.90
   3  -2   0   61.09   14.20
  -3   2   0   39.70   12.70
   2  -2   0  486.55   20.90
   2  -2   0  524.45   22.50
   2  -2   0  461.65   23.00
  -2   2   0  487.95   22.10
   1  -2   0   20.90   12.20
   1  -2   0   27.90   11.40
   1  -2   0   23.40   12.30
  -1   2   0   35.60   13.20
   0  -2   0   44.80   11.30
   0  -2   0   52.09   11.20
   0  -2   0   59.89   10.70
  -1  -2   0   -3.30    9.70
  -1  -2   0   13.70    9.70
  -1  -2   0   19.40   10.50
  -2  -2   0  479.35   18.10
  -2  -2   0  460.35   18.20
  -2  -2   0  529.75   17.90
  -3  -2   0   15.70    9.90
  -3  -2   0   64.89    9.00
  -3  -2   0   40.50    9.40
  -4  -2   0  210.28   15.10
  -4  -2   0  180.78   14.50
  -4  -2   0  202.48   14.20
  -4  -2   0  231.98   16.50
  -5  -2   0  479.05   21.30
  -5  -2   0  497.15   19.90
  -5  -2   0  504.25   20.50
  -5  -2   0  470.45   21.90
  -6  -2   0 1595.84   43.20
  -6  -2   0 1601.94   42.00
  -6  -2   0 1652.53   42.40
  -6  -2   0 1601.04   42.80
  -7  -2   0  205.08   14.70
  -7  -2   0  168.28   15.80
  -7  -2   0  181.68   14.50
  -8  -2   0    3.00   13.80
  -8  -2   0   16.80   13.30
  -8  -2   0   33.50   12.60
  -9  -2   0  419.06   24.40
  -9  -2   0  422.36   22.50
  -9  -2   0  436.26   24.30
 -10  -2   0  145.29   16.50
 -10  -2   0  112.89   15.00
 -10  -2   0   89.29   16.30
 -11  -2   0   77.89   15.70
 -11  -2   0   75.39   16.50
 -11  -2   0   50.59   16.80
 -12  -2   0   54.09   18.10
 -12  -2   0   54.39   17.70
 -12  -2   0   58.09   16.90
 -13  -2   0  278.27   23.00
 -13  -2   0  278.57   23.30
 -14  -2   0   41.40   19.90
 -14  -2   0  -26.70   20.20
 -15  -2   0   19.70   22.30
 -15  -2   0   56.99   21.40
 -16  -2   0  147.29   24.10
 -16  -2   0  122.69   25.10
 -17  -2   0   -4.90   23.70
 -17  -2   0  -32.80   23.10
 -18  -2   0   41.50   24.80
 -18  -2   0   32.60   24.60
 -19  -2   0  -19.60   26.20
 -19  -2   0  -45.10   24.10
  17  -3   0   12.50   36.20
 -17   3   0  -13.20   31.40
  16  -3   0  217.78   38.60
 -16   3   0  202.08   34.50
  15  -3   0   49.40   33.20
 -15   3   0   33.80   29.70
  14  -3   0   30.80   31.40
 -14   3   0   59.59   28.60
  13  -3   0   46.10   30.50
 -13   3   0   80.39   26.30
  12  -3   0   65.69   28.70
 -12   3   0  111.69   25.60
  11  -3   0   94.39   27.20
 -11   3   0  108.39   23.60
  10  -3   0  235.28   28.00
 -10   3   0  271.27   25.50
   9  -3   0   96.19   23.70
  -9   3   0   91.79   20.20
   8  -3   0  225.78   22.30
   8  -3   0  235.58   24.70
  -8   3   0  191.58   21.20
   7  -3   0    4.10   19.00
   7  -3   0    4.20   19.70
  -7   3   0   -2.00   15.70
   6  -3   0   29.30   17.80
   6  -3   0   32.30   18.90
  -6   3   0   32.30   16.10
   5  -3   0   21.80   17.30
   5  -3   0    0.30   18.20
   5  -3   0   23.20   16.10
  -5   3   0   11.70   15.70
   4  -3   0   -0.10   16.90
   4  -3   0   -4.40   14.30
   4  -3   0   -0.40   17.50
  -4   3   0   30.60   15.30
   3  -3   0    6.30   15.90
   3  -3   0   13.20   16.80
   3  -3   0   19.10   13.70
  -3   3   0   10.10   14.40
   2  -3   0   44.50   15.60
   2  -3   0   61.49   14.20
   2  -3   0   51.59   16.30
   1  -3   0   -2.40   13.00
   1  -3   0   18.70   14.40
   1  -3   0    4.10   14.50
   0  -3   0   31.70   14.50
   0  -3   0   -9.90   12.20
   0  -3   0   10.00   13.20
  -1  -3   0  -18.30   13.40
  -1  -3   0   19.10   11.70
  -1  -3   0  -30.00   12.30
  -2  -3   0   35.20   13.20
  -2  -3   0   46.50   11.40
  -2  -3   0   56.39   11.30
  -3  -3   0   -1.30   12.60
  -4  -3   0   -3.00   12.10
  -4  -3   0    8.20   13.60
  -5  -3   0   12.00   13.90
  -5  -3   0   10.50   11.50
  -6  -3   0   69.29   14.90
  -6  -3   0   59.29   12.40
  -7  -3   0   40.30   13.40
  -7  -3   0    4.40   14.40
  -7  -3   0   -7.10   12.50
  -7  -3   0    1.70   11.10
  -8  -3   0  264.67   20.30
  -8  -3   0  231.48   15.80
  -8  -3   0  245.78   17.80
  -8  -3   0  258.37   17.00
  -9  -3   0   95.29   15.40
  -9  -3   0  111.19   16.60
  -9  -3   0  105.19   14.80
  -9  -3   0   74.59   16.30
 -10  -3   0  263.17   19.30
 -10  -3   0  219.28   19.00
 -10  -3   0  287.17   20.30
 -10  -3   0  238.58   17.90
 -11  -3   0   97.59   17.10
 -11  -3   0  135.59   18.60
 -11  -3   0   72.79   17.80
 -11  -3   0   73.89   18.80
 -12  -3   0  131.49   21.10
 -12  -3   0   78.29   18.50
 -12  -3   0   88.59   19.00
 -12  -3   0   78.29   18.30
 -13  -3   0   69.09   22.60
 -13  -3   0   40.60   19.40
 -13  -3   0   68.39   21.70
 -13  -3   0   51.29   18.30
 -14  -3   0   58.59   20.90
 -14  -3   0   56.99   19.40
 -14  -3   0   55.59   23.00
 -15  -3   0   25.20   20.00
 -15  -3   0  -18.60   21.30
 -16  -3   0  150.28   23.00
 -16  -3   0  108.29   25.00
 -17  -3   0   -3.90   21.70
 -17  -3   0   -5.90   24.50
  16  -4   0  -17.50   37.80
  15  -4   0  -45.40   35.40
  14  -4   0  -28.30   33.80
  13  -4   0  -40.20   32.70
  12  -4   0    2.60   31.60
  11  -4   0  -16.40   28.80
  10  -4   0  192.48   31.30
   9  -4   0   90.89   29.00
   8  -4   0  896.21   47.30
  -8   4   0  939.51   46.60
   7  -4   0  393.36   28.40
   7  -4   0  394.16   30.70
  -7   4   0  352.16   26.40
   6  -4   0  163.68   22.80
   6  -4   0   99.69   24.30
   6  -4   0   99.59   23.10
  -6   4   0  104.59   20.60
   5  -4   0  384.06   28.10
   5  -4   0  412.36   27.00
   5  -4   0  340.47   23.00
  -5   4   0  359.86   28.30
   4  -4   0   84.39   21.10
   4  -4   0   85.99   20.60
   4  -4   0   89.79   17.10
  -4   4   0   65.09   17.20
   3  -4   0    2.30   18.70
   3  -4   0    3.70   17.60
   3  -4   0   15.30   14.90
   2  -4   0  -19.70   16.60
   2  -4   0   -2.80   14.10
   2  -4   0    8.60   17.50
   1  -4   0   39.60   16.30
   1  -4   0   34.20   17.00
   1  -4   0   19.10   13.50
   0  -4   0  131.59   17.90
   0  -4   0  114.99   14.30
   0  -4   0  133.69   16.40
  -1  -4   0   51.29   16.20
  -1  -4   0   25.50   12.40
  -1  -4   0   37.50   14.20
  -2  -4   0  -21.60   15.40
  -2  -4   0    6.00   12.40
  -2  -4   0    2.80   11.60
  -3  -4   0  -12.70   15.10
  -4  -4   0   73.69   15.70
  -5  -4   0  448.26   25.90
  -5  -4   0  442.46   27.00
  -6  -4   0  203.38   18.00
  -6  -4   0  130.39   18.90
  -7  -4   0  418.06   27.10
  -7  -4   0  482.15   26.90
  -8  -4   0  929.71   33.80
  -8  -4   0  936.91   35.50
  -9  -4   0   73.79   17.80
  -9  -4   0   97.49   18.90
 -10  -4   0  176.98   20.00
 -10  -4   0  141.49   19.60
 -11  -4   0   30.90   19.10
 -11  -4   0   37.70   18.10
 -12  -4   0   87.09   21.40
 -12  -4   0    9.70   18.60
 -13  -4   0  -45.90   21.40
 -13  -4   0   44.40   19.70
 -13  -4   0  -13.40   18.30
 -13  -4   0    1.90   16.30
 -14  -4   0   -1.30   19.60
 -14  -4   0   -8.40   23.00
 -14  -4   0  -16.30   17.40
 -15  -4   0   -5.90   20.90
 -15  -4   0  -12.50   18.00
 -15  -4   0   80.99   34.30
 -16  -4   0   26.90   22.60
 -16  -4   0    5.70   19.10
  13  -5   0  -21.70   37.00
  12  -5   0   33.20   35.60
  11  -5   0   42.30   33.60
  10  -5   0   86.19   27.90
  10  -5   0  120.69   33.90
   9  -5   0   -9.00   30.50
   8  -5   0  156.38   31.90
   7  -5   0   12.60   28.00
   6  -5   0  361.66   32.00
   5  -5   0  399.66   32.00
   5  -5   0  393.46   30.80
   4  -5   0  -16.40   24.90
   4  -5   0   22.60   22.30
   3  -5   0  526.95   37.60
   3  -5   0  552.84   35.30
   2  -5   0  161.98   25.30
   2  -5   0  140.29   21.40
   2  -5   0   76.29   18.10
   1  -5   0  176.78   20.80
   1  -5   0  211.38   25.10
   1  -5   0  123.79   17.90
   0  -5   0   16.80   22.00
   0  -5   0   -6.80   14.80
   0  -5   0    5.80   17.50
  -1  -5   0  186.38   18.50
  -1  -5   0  188.78   23.60
  -1  -5   0  136.59   16.10
  -2  -5   0  110.19   22.30
  -3  -5   0  508.35   33.40
  -4  -5   0   35.90   21.50
  -5  -5   0  438.06   32.70
  -5  -5   0  444.66   32.90
  -6  -5   0  516.25   32.00
  -6  -5   0  492.65   32.10
  -7  -5   0   20.90   22.80
  -7  -5   0   14.70   20.30
  -8  -5   0  200.78   22.70
  -8  -5   0  224.28   25.30
  -9  -5   0   34.10   20.70
  -9  -5   0   -1.30   23.20
 -10  -5   0  109.89   25.00
 -10  -5   0   52.49   20.90
 -11  -5   0   44.90   20.60
 -11  -5   0   37.70   25.60
 -12  -5   0    9.00   19.40
 -12  -5   0   24.10   25.20
 -13  -5   0   -8.20   19.40
 -13  -5   0  -22.30   22.70
   9  -6   0  -30.30   32.40
   8  -6   0    2.30   31.00
   7  -6   0   24.00   30.00
   6  -6   0    4.70   26.80
   5  -6   0   56.79   26.70
   4  -6   0   42.50   24.70
   3  -6   0   12.10   22.90
   2  -6   0  120.19   30.20
   2  -6   0   88.89   22.60
   1  -6   0  134.79   29.40
   1  -6   0  126.19   21.40
   0  -6   0  263.77   31.50
   0  -6   0  273.17   22.50
   0  -6   0  128.09   25.00
  -1  -6   0  116.29   28.70
  -2  -6   0   44.20   27.00
  -3  -6   0   46.20   26.60
  -4  -6   0   42.30   25.10
  -4  -6   0    9.80   26.20
  -5  -6   0   45.60   25.20
  -5  -6   0   64.29   26.80
  -6  -6   0  -31.40   26.10
  -6  -6   0   -5.10   23.00
  -7  -6   0   24.00   26.50
  -7  -6   0   49.50   23.30
  -8  -6   0   -9.30   22.90
  -8  -6   0    3.10   27.50
  -9  -6   0   42.30   23.30
  -9  -6   0   47.90   28.00
  -9  -6   1   66.59   26.60
  -9  -6   1  -11.10   20.90
  -8  -6   1  -13.30   24.80
  -8  -6   1   13.70   21.40
  -7  -6   1   85.09   22.50
  -7  -6   1  108.39   26.10
  -6  -6   1   61.29   22.90
  -6  -6   1  148.69   26.00
  -5  -6   1   30.00   24.40
  -5  -6   1  -13.30   23.20
  -4  -6   1  110.09   25.70
  -3  -6   1  222.98   28.20
  -2  -6   1   33.00   26.10
  -1  -6   1  319.07   30.70
   0  -6   1   63.09   18.80
   0  -6   1   26.90   15.70
   0  -6   1   52.09   27.60
   1  -6   1  -23.70   27.30
   1  -6   1   22.50   19.60
   2  -6   1   43.20   21.40
   2  -6   1   38.70   30.20
   3  -6   1  114.49   23.70
   4  -6   1   58.19   25.40
   5  -6   1   37.70   25.50
   6  -6   1   59.29   28.50
   7  -6   1   11.10   29.30
   8  -6   1  116.39   32.90
   9  -6   1   80.49   33.20
 -13  -5   1  -65.09   21.10
 -13  -5   1   -0.30   18.10
 -12  -5   1  -19.90   18.00
 -12  -5   1   -2.10   24.30
 -11  -5   1   44.60   24.10
 -11  -5   1   53.59   19.40
 -10  -5   1   35.70   18.90
 -10  -5   1   -9.40   22.60
  -9  -5   1   83.39   22.40
  -9  -5   1   94.79   19.90
  -8  -5   1   -2.20   19.10
  -8  -5   1   24.20   21.30
  -7  -5   1   49.90   19.20
  -7  -5   1   66.69   21.30
  -6  -5   1  558.24   30.30
  -6  -5   1  544.25   32.40
  -5  -5   1  313.87   23.60
  -5  -5   1  318.37   23.60
  -4  -5   1   -2.70   19.20
  -3  -5   1   16.20   19.50
  -2  -5   1   94.59   21.30
  -1  -5   1   78.59   16.40
  -1  -5   1   31.10   21.00
   0  -5   1   45.90   21.30
   0  -5   1   40.00   15.00
   0  -5   1    2.10   16.80
   1  -5   1   90.29   19.50
   1  -5   1   74.29   16.40
   1  -5   1   96.59   22.70
   2  -5   1   57.99   17.70
   2  -5   1  126.89   21.60
   2  -5   1   48.20   23.00
   3  -5   1  184.88   27.00
   3  -5   1  242.08   24.00
   3  -5   1  180.48   23.60
   4  -5   1   35.50   24.00
   4  -5   1   15.00   23.30
   5  -5   1  109.79   26.40
   5  -5   1   77.09   26.00
   6  -5   1  106.59   28.30
   7  -5   1   27.20   28.20
   8  -5   1  -40.90   28.70
   9  -5   1   58.29   31.20
  10  -5   1   86.19   32.90
  11  -5   1    1.40   34.10
  12  -5   1   15.60   35.50
  13  -5   1   80.99   39.00
 -16  -4   1   54.69   17.70
 -16  -4   1   13.10   21.60
 -15  -4   1   -9.90   19.60
 -15  -4   1   22.60   23.50
 -14  -4   1    8.30   21.80
 -14  -4   1    9.90   18.30
 -13  -4   1    7.50   20.80
 -13  -4   1   11.30   17.10
 -12  -4   1    8.90   19.40
 -12  -4   1    5.00   16.60
 -11  -4   1    3.00   17.90
 -11  -4   1  -13.50   16.80
 -10  -4   1   39.60   17.10
 -10  -4   1   -2.90   16.80
  -9  -4   1    8.40   16.00
  -9  -4   1    0.80   15.80
  -8  -4   1  213.08   18.80
  -8  -4   1  176.88   17.10
  -7  -4   1   77.39   16.90
  -7  -4   1   56.29   15.90
  -6  -4   1   10.30   15.40
  -6  -4   1   41.90   15.00
  -5  -4   1  335.47   23.40
  -5  -4   1  357.56   22.90
  -4  -4   1  -18.60   14.20
  -3  -4   1   16.90   14.60
  -2  -4   1    7.50   14.70
  -1  -4   1  241.98   16.10
  -1  -4   1  257.47   18.60
  -1  -4   1  222.58   17.20
   0  -4   1    8.00   14.10
   0  -4   1   13.30   12.30
   0  -4   1    2.80   15.80
   1  -4   1   84.89   16.70
   1  -4   1   60.59   17.10
   1  -4   1   31.50   13.60
   2  -4   1  106.99   18.80
   2  -4   1  121.69   15.80
   2  -4   1  112.09   18.70
   3  -4   1   66.09   16.40
   3  -4   1   76.29   19.30
   3  -4   1   42.00   19.20
  -4   4  -1   23.40   16.70
   4  -4   1   41.70   20.70
   4  -4   1   19.90   16.10
   4  -4   1    3.40   19.30
  -5   4  -1  567.54   31.70
   5  -4   1  662.13   35.70
   5  -4   1  612.84   34.10
  -6   4  -1  449.56   31.20
   6  -4   1  506.15   33.80
   6  -4   1  470.85   30.90
   7  -4   1   60.99   25.70
   7  -4   1   66.89   23.40
   8  -4   1   88.39   26.80
   9  -4   1   54.89   27.20
  10  -4   1   25.20   28.50
  11  -4   1  130.39   32.00
  12  -4   1   23.30   31.80
  13  -4   1   36.60   33.20
  14  -4   1  -44.10   34.40
  15  -4   1   89.29   38.50
 -18  -3   1   28.10   21.80
 -18  -3   1   34.40   24.70
 -17  -3   1   23.80   23.30
 -17  -3   1   57.79   21.30
 -16  -3   1   14.70   21.90
 -16  -3   1   24.70   19.90
 -15  -3   1   65.39   23.70
 -15  -3   1   10.80   19.00
 -15  -3   1   83.59   21.40
 -14  -3   1   18.10   17.50
 -14  -3   1   -5.10   21.30
 -14  -3   1    8.20   18.90
 -13  -3   1    5.30   19.90
 -13  -3   1   16.30   18.10
 -13  -3   1  -12.40   17.20
 -13  -3   1   19.10   16.80
 -12  -3   1   82.99   17.80
 -12  -3   1   43.80   16.60
 -12  -3   1   91.09   19.70
 -12  -3   1   70.89   16.10
 -11  -3   1   -3.60   17.10
 -11  -3   1    0.10   16.00
 -11  -3   1    5.70   15.00
 -11  -3   1   10.60   13.90
 -10  -3   1  401.96   26.10
 -10  -3   1  431.96   24.80
 -10  -3   1  459.05   24.10
 -10  -3   1  394.26   22.30
  -9  -3   1    0.80   13.60
  -9  -3   1   16.30   14.20
  -9  -3   1   41.00   11.90
  -9  -3   1   31.10   14.40
  -8  -3   1   13.60   12.80
  -8  -3   1   34.40   13.50
  -7  -3   1  120.59   14.00
  -7  -3   1  139.59   13.00
  -6  -3   1  521.35   22.20
  -6  -3   1  531.95   20.70
  -5  -3   1   28.00   10.30
  -5  -3   1   15.10   12.30
  -4  -3   1  286.77   16.90
  -3  -3   1  210.28   14.20
  -2  -3   1  124.39   12.70
  -1  -3   1  142.09   11.40
  -1  -3   1  128.09   14.20
  -1  -3   1  137.49   13.20
   0  -3   1  150.88   12.80
   0  -3   1  142.89   15.30
   0  -3   1  136.89   14.40
   1  -3   1    5.40   14.50
   1  -3   1    0.80   14.10
   1  -3   1  -18.00   12.00
   2  -3   1   88.49   14.20
   2  -3   1  102.99   17.00
   2  -3   1   87.29   16.10
  -3   3  -1  242.78   17.70
   3  -3   1  240.18   19.60
   3  -3   1  262.97   20.00
   3  -3   1  249.18   17.40
  -4   3  -1  122.39   15.70
   4  -3   1  121.89   17.90
   4  -3   1  141.79   16.60
   4  -3   1  107.29   18.10
  -5   3  -1    6.30   14.70
   5  -3   1    6.30   17.90
   5  -3   1   15.90   15.10
   5  -3   1    3.30   17.10
  -6   3  -1   80.49   17.20
   6  -3   1  153.58   21.10
   6  -3   1   93.79   19.00
  -7   3  -1  573.54   30.70
   7  -3   1  541.25   31.30
   7  -3   1  578.84   34.10
  -8   3  -1   73.49   19.70
   8  -3   1  114.29   20.00
   8  -3   1  110.69   23.20
  -9   3  -1  190.88   23.40
   9  -3   1  221.58   26.90
   9  -3   1  213.08   27.80
 -10   3  -1   36.80   22.40
  10  -3   1   35.00   25.50
 -11   3  -1 1080.29   47.80
  11  -3   1  973.90   50.99
 -12   3  -1  194.78   29.00
  12  -3   1  205.28   31.60
 -13   3  -1   -6.10   25.90
  13  -3   1   53.09   30.40
 -14   3  -1    4.60   27.50
  14  -3   1  -11.20   31.70
 -15   3  -1   32.30   30.20
  15  -3   1   50.09   34.80
 -16   3  -1   62.29   32.20
  16  -3   1  106.59   37.40
 -17   3  -1   12.10   34.30
  17  -3   1   36.50   37.70
 -19  -2   1   91.69   25.20
 -19  -2   1   77.49   25.70
 -18  -2   1  -13.00   24.00
 -18  -2   1    1.70   22.60
 -17  -2   1   37.00   22.90
 -17  -2   1   26.20   23.00
 -16  -2   1   -4.40   21.20
 -16  -2   1   11.60   21.30
 -15  -2   1    6.10   20.30
 -15  -2   1   22.60   19.70
 -14  -2   1  169.48   21.20
 -14  -2   1  150.78   21.70
 -13  -2   1  211.38   19.10
 -13  -2   1  239.88   21.90
 -13  -2   1  222.88   20.90
 -12  -2   1   68.89   16.90
 -12  -2   1   82.89   17.80
 -12  -2   1   77.29   15.40
 -11  -2   1  305.57   23.50
 -11  -2   1  238.28   19.30
 -11  -2   1  318.27   22.00
 -10  -2   1   16.80   13.80
 -10  -2   1   30.70   13.60
 -10  -2   1   19.50   13.00
  -9  -2   1    7.00   12.00
  -9  -2   1   12.50   12.80
  -9  -2   1   -1.50   12.30
  -8  -2   1  487.95   21.80
  -8  -2   1  521.85   23.20
  -8  -2   1  512.95   22.10
  -7  -2   1 1258.67   35.90
  -7  -2   1 1255.27   34.70
  -7  -2   1 1281.77   34.80
  -6  -2   1  209.28   14.20
  -6  -2   1  222.68   16.10
  -6  -2   1  196.58   13.20
  -5  -2   1   -4.40   11.10
  -1  -2   1  136.29    9.10
  -1  -2   1  118.69   10.10
  -1  -2   1  130.39   10.30
   0  -2   1   43.00   10.70
   0  -2   1   50.69   11.00
   0  -2   1   55.99    9.40
   1  -2   1  146.39   13.10
   1  -2   1  198.08   13.80
   1  -2   1  199.58   15.20
  -2   2  -1   16.80   12.10
   2  -2   1    5.70   12.40
   2  -2   1    4.70   13.10
   2  -2   1   29.20   11.50
  -3   2  -1  122.59   14.60
   3  -2   1  100.79   15.00
   3  -2   1  113.09   15.20
   3  -2   1  102.49   13.70
  -4   2  -1  -18.30   14.20
   4  -2   1  -18.40   15.40
   4  -2   1    0.10   15.60
  -5   2  -1  307.67   24.20
   5  -2   1  325.57   21.90
   5  -2   1  325.47   24.30
  -6   2  -1  732.73   30.70
  -6   2  -1  676.43   31.20
   6  -2   1  759.52   34.30
   6  -2   1  774.42   32.20
  -7   2  -1  854.91   34.60
  -7   2  -1  778.72   32.70
   7  -2   1  841.32   36.40
  -8   2  -1  881.01   35.60
  -8   2  -1  831.92   35.40
   8  -2   1  912.31   38.80
  -9   2  -1  105.49   19.70
  -9   2  -1   85.19   19.10
   9  -2   1  108.19   21.80
 -10   2  -1  150.88   21.90
 -10   2  -1  161.28   22.10
  10  -2   1  154.38   23.80
 -11   2  -1   78.89   22.30
 -11   2  -1   65.29   22.80
  11  -2   1   55.29   24.30
 -12   2  -1   65.29   23.70
 -12   2  -1  131.29   25.00
  12  -2   1  104.09   26.40
 -13   2  -1  -31.50   25.10
  13  -2   1   48.60   27.10
 -14   2  -1   33.50   26.70
  14  -2   1   16.30   29.00
 -15   2  -1  -34.50   27.90
  15  -2   1   32.90   31.00
 -16   2  -1   69.69   32.00
  16  -2   1   35.80   33.20
 -17   2  -1   49.70   32.90
  17  -2   1   51.89   34.80
 -18   2  -1   49.90   34.30
 -19  -1   1  -19.90   24.70
 -19  -1   1    1.70   25.30
 -18  -1   1   48.10   24.90
 -18  -1   1  112.79   26.80
 -17  -1   1   85.19   24.00
 -17  -1   1   64.29   24.30
 -16  -1   1   22.10   22.60
 -16  -1   1   -7.10   21.70
 -15  -1   1  -11.30   20.40
 -15  -1   1   -3.50   21.10
 -14  -1   1   25.40   20.40
 -14  -1   1   21.90   19.50
 -13  -1   1  114.79   19.70
 -13  -1   1  111.59   20.30
 -13  -1   1  112.19   16.70
 -12  -1   1  309.37   23.00
 -12  -1   1  310.87   22.30
 -12  -1   1  279.37   21.10
  11   1  -1  221.88   21.30
 -11  -1   1  171.68   17.90
 -11  -1   1  150.78   18.00
 -11  -1   1  129.29   14.90
  10   1  -1   15.50   17.80
 -10  -1   1   -2.60   14.80
 -10  -1   1  -17.20   12.20
 -10  -1   1   23.40   14.50
   9   1  -1  -20.80   16.60
  -9  -1   1   27.90   12.30
  -9  -1   1   15.80   14.60
  -9  -1   1   -2.00   13.60
   8   1  -1  132.09   18.10
  -8  -1   1  122.89   13.90
  -8  -1   1  105.69   15.20
  -8  -1   1  166.78   15.20
   7   1  -1  130.89   19.50
  -7  -1   1  136.49   13.10
  -7  -1   1  149.59   14.20
  -7  -1   1  141.29   14.70
  -6  -1   1    0.90   10.60
  -6  -1   1   -0.10   11.40
  -6  -1   1   10.10   10.10
  -5  -1   1 1394.36   34.80
  -5  -1   1 1342.37   35.30
  -5  -1   1 1308.87   34.80
  -4  -1   1 1822.62   44.00
  -4  -1   1 1828.22   44.30
  -4  -1   1 1862.61   44.10
   0  -1   1   53.99    7.10
   0  -1   1   81.49    7.00
   0  -1   1   50.49    7.10
  -1   1  -1 1792.62   44.00
   1  -1   1 1859.01   44.50
   1  -1   1 1897.01   44.00
   1  -1   1 1768.22   44.30
  -2   1  -1 6443.66  145.09
  -2   1  -1 6340.17  145.59
   2  -1   1 6364.46  145.39
   2  -1   1 6308.17  145.29
   2  -1   1 6347.96  144.99
  -3   1  -1 7271.97  169.68
  -3   1  -1 7391.76  169.48
   3  -1   1 7607.14  169.78
  -4   1  -1 3257.67   78.79
  -4   1  -1 3197.58   78.99
   4  -1   1 3401.86   79.19
  -5   1  -1  762.02   28.10
  -5   1  -1  744.73   28.80
  -6   1  -1  173.38   17.20
  -6   1  -1  165.98   17.90
  -7   1  -1  432.26   27.10
  -7   1  -1  415.56   28.20
  -8   1  -1   48.00   17.30
  -8   1  -1   51.99   18.80
  -9   1  -1  112.49   19.30
  -9   1  -1  107.29   18.20
   9  -1   1  133.09   20.60
 -10   1  -1  177.58   21.00
 -10   1  -1  153.68   19.90
  10  -1   1  135.99   21.40
 -11   1  -1   34.70   19.00
 -11   1  -1   18.30   19.80
  11  -1   1   22.00   20.90
 -12   1  -1  765.32   38.10
 -12   1  -1  762.62   37.90
  12  -1   1  793.72   40.10
 -13   1  -1   51.89   22.90
 -13   1  -1   58.19   22.50
  13  -1   1   19.40   23.80
 -14   1  -1  157.08   26.60
 -14   1  -1  121.29   25.10
  14  -1   1   94.29   26.90
 -15   1  -1  134.39   26.20
 -15   1  -1  279.37   30.70
  15  -1   1  233.88   31.00
 -16   1  -1  239.88   35.00
 -16   1  -1  214.68   30.60
  16  -1   1  238.58   33.60
 -17   1  -1    0.50   29.10
 -18   1  -1  153.88   33.70
 -19   1  -1  -10.60   32.80
 -20   0   1   30.00   36.10
 -20   0   1    4.30   28.50
 -19   0   1   50.29   28.30
 -19   0   1   39.30   26.20
 -18   0   1    7.60   24.70
 -18   0   1    1.20   26.60
 -17   0   1  338.27   31.40
 -17   0   1  317.27   29.20
 -16   0   1    2.70   23.20
 -16   0   1   -1.80   22.50
 -15   0   1   99.79   23.70
 -15   0   1   86.49   23.80
  14   0  -1  -13.40   21.20
 -14   0   1  -22.20   20.20
 -14   0   1    2.80   20.30
 -13   0   1 1544.75   51.59
 -13   0   1 1657.53   51.79
  12   0  -1  -26.30   18.30
 -12   0   1   -8.60   17.80
 -12   0   1  -14.80   17.50
  11   0  -1   34.30   18.00
 -11   0   1   13.70   17.20
 -11   0   1   -1.00   16.40
  10   0  -1  -17.50   16.80
 -10   0   1   20.70   16.90
 -10   0   1  -11.50   15.70
   9   0  -1  -13.40   16.50
  -9   0   1   18.60   16.70
  -9   0   1   18.10   15.40
  -8   0   1  -34.00   16.00
  -8   0   1   -1.20   14.80
  -7   0   1   29.70   13.20
  -7   0   1    9.80   14.60
  -6   0   1   -1.10   13.00
  -6   0   1  -11.90   11.70
  -5   0   1  269.97   16.50
  -5   0   1  258.47   19.30
  -5   0   1  226.28   17.90
   4   0  -1   27.20   10.80
  -4   0   1    2.50   10.10
  -4   0   1   -1.50   10.90
  -4   0   1  -23.10   11.20
   3   0  -1 5264.17  121.29
  -3   0   1 5415.06  121.39
  -3   0   1 5287.07  121.29
   2   0  -1    7.40    5.30
  -2   0   1    5.20    5.20
  -2   0   1    1.10    5.10
  -2   0   1    6.10    5.60
  -1   0  -1 2529.35   57.29
  -1   0  -1 2478.25   57.39
  -1   0  -1 2493.35   57.19
   1   0   1 2574.14   57.29
   1   0   1 2502.25   57.39
   1   0   1 2460.25   57.29
  -2   0  -1    3.90    6.80
  -2   0  -1   -6.20    7.70
   2   0   1   -6.50    7.60
  -3   0  -1   17.30   10.70
  -3   0  -1   -0.40    9.80
   3   0   1   -1.00   10.50
  -4   0  -1  -14.20   12.50
  -4   0  -1    0.50   10.60
   4   0   1   -4.10   12.00
  -5   0  -1   78.69   12.80
  -5   0  -1   48.80   13.80
   5   0   1   53.99   14.50
  -6   0  -1    3.30   12.80
  -6   0  -1   -8.10   14.30
   6   0   1   32.10   15.30
  -7   0  -1   51.89   16.60
  -7   0  -1   65.99   15.70
   7   0   1   62.59   17.60
  -8   0  -1  -22.30   16.80
  -8   0  -1    3.10   15.40
   8   0   1  -17.30   19.00
  -9   0  -1    5.50   15.90
  -9   0  -1  -17.60   16.90
   9   0   1   29.40   19.70
 -10   0  -1   -9.60   17.00
 -10   0  -1   -9.40   16.10
  10   0   1   -9.60   19.80
 -11   0  -1    3.70   17.80
 -11   0  -1   35.20   18.70
  11   0   1   31.60   21.50
 -12   0  -1    5.20   19.30
 -12   0  -1  -10.80   18.50
  12   0   1  -19.90   22.50
 -13   0  -1  109.99   22.20
 -13   0  -1   97.09   21.70
 -14   0  -1   13.10   22.30
 -14   0  -1   12.50   22.00
 -15   0  -1   -2.50   22.30
 -15   0  -1   17.00   23.90
 -16   0  -1    6.30   24.90
 -16   0  -1   20.80   23.70
 -17   0  -1   25.80   27.80
 -17   0  -1    3.60   25.40
 -18   0  -1    6.40   26.40
 -18   0  -1   34.40   28.90
 -19   0  -1   35.70   31.40
 -19   1   1   14.60   30.30
 -18   1   1   53.09   29.00
 -17   1   1  104.69   29.40
 -17   1   1  110.89   28.00
  16  -1  -1    8.70   28.20
 -16   1   1   -8.60   25.30
 -16   1   1    3.90   24.50
  15  -1  -1   66.99   27.10
 -15   1   1    3.30   24.90
 -15   1   1   14.90   23.00
  14  -1  -1   -9.20   24.20
 -14   1   1   12.60   21.60
 -14   1   1   11.60   23.20
  13  -1  -1  118.09   24.70
 -13   1   1  120.49   23.20
 -13   1   1   94.69   21.50
  12  -1  -1  283.47   25.40
 -12   1   1  261.47   23.90
 -12   1   1  263.47   24.00
  11  -1  -1  187.18   22.30
 -11   1   1  137.59   20.50
 -11   1   1  154.28   20.60
  10  -1  -1    7.40   18.50
 -10   1   1   -3.30   16.80
 -10   1   1   -4.80   17.10
   9  -1  -1  -10.10   18.10
  -9   1   1   31.30   17.80
  -9   1   1   16.60   17.00
   8  -1  -1  124.39   19.10
  -8   1   1  133.29   18.30
  -8   1   1  121.49   19.40
   7  -1  -1  115.09   18.30
  -7   1   1  145.19   17.60
  -7   1   1  102.19   18.30
   6  -1  -1   23.10   15.00
  -6   1   1   20.10   15.90
  -6   1   1    2.10   14.40
   5  -1  -1 1429.56   41.20
  -5   1   1 1483.05   41.00
  -5   1   1 1405.36   40.50
   4  -1  -1 1861.41   49.10
  -4   1   1 1878.21   48.90
  -4   1   1 1921.01   49.00
   3  -1  -1  581.54   22.30
   3  -1  -1  552.04   22.90
  -3   1   1  575.54   22.10
  -3   1   1  591.64   22.40
   2  -1  -1  902.21   26.50
   2  -1  -1  905.21   26.80
   2  -1  -1  909.41   27.30
  -2   1   1  873.71   26.20
  -2   1   1  899.81   26.50
   1  -1  -1  936.81   24.60
   1  -1  -1  892.71   25.30
   1  -1  -1  929.91   25.50
   1  -1  -1  829.22   25.60
  -1   1   1  911.11   25.40
  -1   1   1  829.92   27.10
   0  -1  -1   62.29    8.90
   0  -1  -1   81.89    9.60
   0  -1  -1   79.89    9.20
   0   1   1   81.39    9.40
  -1  -1  -1 1770.52   42.50
  -1  -1  -1 1744.33   43.20
  -1  -1  -1 1796.52   42.90
   1   1   1 1794.02   43.00
  -2  -1  -1 6279.97  140.79
  -2  -1  -1 6259.37  141.09
  -2  -1  -1 5817.72  141.09
  -2  -1  -1 6272.67  140.69
   2   1   1 6410.96  140.99
  -3  -1  -1 7364.36  168.78
  -3  -1  -1 7241.58  168.48
  -3  -1  -1 7676.33  168.38
  -3  -1  -1 7382.06  168.38
   3   1   1 7454.75  168.58
  -4  -1  -1 3250.17   74.69
  -4  -1  -1 3195.98   74.59
  -4  -1  -1 3148.19   74.59
  -4  -1  -1 3078.89   74.99
   4   1   1 3123.99   74.89
  -5  -1  -1  698.03   24.20
  -5  -1  -1  700.83   24.80
  -5  -1  -1  689.23   26.00
   5   1   1  719.73   25.10
  -6  -1  -1  183.28   15.50
  -6  -1  -1  160.78   14.50
  -6  -1  -1  133.29   13.40
   6   1   1  143.89   15.10
  -7  -1  -1  385.76   23.50
  -7  -1  -1  373.46   25.30
  -7  -1  -1  398.46   21.60
   7   1   1  384.76   25.30
  -8  -1  -1   16.30   15.10
  -8  -1  -1   28.40   15.80
  -8  -1  -1   -1.00   12.30
   8   1   1   17.80   16.80
  -9  -1  -1  105.99   14.60
  -9  -1  -1  109.29   16.90
  -9  -1  -1  123.19   17.10
   9   1   1  121.39   18.80
 -10  -1  -1  130.19   15.20
 -10  -1  -1  142.69   18.70
 -10  -1  -1  130.09   18.10
  10   1   1  124.09   19.60
 -11  -1  -1   20.80   14.00
 -11  -1  -1   33.30   17.50
 -11  -1  -1  -19.80   16.50
  11   1   1   -6.20   19.80
 -12  -1  -1  597.54   31.00
 -12  -1  -1  751.62   34.50
 -12  -1  -1  753.42   35.00
  12   1   1  641.94   35.50
 -13  -1  -1   35.70   20.30
 -13  -1  -1   11.90   20.70
  13   1   1   29.20   29.90
 -14  -1  -1  120.59   23.10
 -14  -1  -1   66.59   22.50
 -15  -1  -1  174.58   25.60
 -15  -1  -1  202.18   25.30
 -16  -1  -1  292.27   28.10
 -16  -1  -1  259.67   28.30
 -17  -1  -1   22.30   25.00
 -17  -1  -1   78.79   26.40
 -18  -1  -1  101.59   27.30
 -18  -1  -1   75.49   27.30
 -19  -1  -1  -23.90   27.00
 -19  -1  -1  -27.90   25.20
 -19   2   1  172.68   36.10
 -18   2   1   -0.60   31.40
  17  -2  -1  -42.90   32.40
 -17   2   1  -17.50   28.70
  16  -2  -1   15.80   31.40
 -16   2   1   17.30   27.70
  15  -2  -1  -11.30   28.70
 -15   2   1   -8.20   25.70
  14  -2  -1  186.58   30.70
 -14   2   1  139.59   26.40
  13  -2  -1  221.28   29.70
 -13   2   1  283.27   27.70
 -13   2   1  223.58   25.20
  12  -2  -1   78.39   25.30
 -12   2   1   70.19   22.20
 -12   2   1   79.39   21.50
  11  -2  -1  368.86   28.20
 -11   2   1  316.57   25.40
 -11   2   1  327.07   25.30
  10  -2  -1   45.70   20.70
 -10   2   1   14.90   17.70
 -10   2   1   11.10   17.70
   9  -2  -1   15.70   19.40
  -9   2   1   24.60   17.10
  -9   2   1    6.70   16.70
   8  -2  -1  466.55   31.40
  -8   2   1  514.75   28.40
  -8   2   1  513.65   28.70
   7  -2  -1 1305.67   42.60
  -7   2   1 1237.98   40.40
  -7   2   1 1203.28   40.10
   6  -2  -1  214.28   20.20
   6  -2  -1  239.68   20.10
  -6   2   1  201.78   18.30
  -6   2   1  146.19   17.80
   5  -2  -1   21.60   16.70
   5  -2  -1   10.20   16.60
  -5   2   1  -17.90   14.40
  -5   2   1    6.30   14.30
   4  -2  -1   21.50   15.10
   4  -2  -1   27.90   15.20
  -4   2   1   30.80   14.50
   3  -2  -1   64.09   14.80
   3  -2  -1   56.79   13.80
   3  -2  -1   50.99   14.40
  -3   2   1   51.39   13.70
   2  -2  -1  950.20   30.30
   2  -2  -1  896.11   29.30
   2  -2  -1  920.41   30.90
  -2   2   1  906.31   29.40
   1  -2  -1  165.98   14.80
   1  -2  -1  122.79   13.80
   1  -2  -1  167.58   13.80
  -1   2   1  152.68   13.60
   0  -2  -1   53.19   12.30
   0  -2  -1   68.09   12.10
   0  -2  -1   36.10   11.70
  -1  -2  -1  202.78   13.80
  -1  -2  -1  169.08   13.30
  -1  -2  -1  184.68   13.20
  -2  -2  -1   19.00   11.00
  -2  -2  -1   33.90   10.50
  -2  -2  -1   31.60   12.00
  -3  -2  -1  111.79   13.30
  -3  -2  -1  102.19   11.60
  -3  -2  -1  122.19   11.40
  -3  -2  -1  102.49   13.80
  -4  -2  -1  -12.90   12.80
  -4  -2  -1   -0.20   11.30
  -4  -2  -1   -7.30   10.70
  -4  -2  -1   12.70   13.30
  -5  -2  -1  271.47   19.30
  -5  -2  -1  283.67   19.40
  -5  -2  -1  295.47   21.10
  -5  -2  -1  300.37   18.20
  -6  -2  -1  651.73   25.10
  -6  -2  -1  646.44   27.00
  -6  -2  -1  657.13   25.40
  -6  -2  -1  638.74   25.80
  -7  -2  -1  822.42   28.90
  -7  -2  -1  802.22   29.00
  -7  -2  -1  827.22   30.50
  -7  -2  -1  818.32   29.30
  -8  -2  -1  834.72   29.40
  -8  -2  -1  822.82   29.80
  -8  -2  -1  803.42   31.50
  -8  -2  -1  856.51   30.40
  -9  -2  -1   92.99   14.70
  -9  -2  -1   99.79   16.40
  -9  -2  -1  122.09   16.30
  -9  -2  -1   81.49   16.30
 -10  -2  -1  134.19   18.30
 -10  -2  -1  137.19   16.40
 -10  -2  -1  168.18   19.00
 -10  -2  -1  161.88   18.00
 -11  -2  -1   66.59   17.90
 -11  -2  -1   31.90   15.80
 -11  -2  -1   59.59   19.10
 -11  -2  -1   54.29   17.70
 -12  -2  -1   95.29   20.80
 -12  -2  -1   63.59   19.50
 -12  -2  -1   98.39   18.10
 -12  -2  -1   73.99   19.50
 -13  -2  -1   -3.30   19.80
 -13  -2  -1   -1.60   19.20
 -13  -2  -1   45.00   22.40
 -14  -2  -1   27.20   21.20
 -14  -2  -1   40.70   22.20
 -14  -2  -1   17.40   26.30
 -15  -2  -1   -2.40   22.50
 -15  -2  -1   31.80   21.60
 -16  -2  -1   57.49   25.30
 -16  -2  -1   65.09   24.00
 -17  -2  -1   58.59   26.20
 -17  -2  -1  -14.20   23.50
 -18  -2  -1   15.10   25.70
 -18  -2  -1   -1.60   25.50
  18  -3  -1  -45.00   37.40
 -18   3   1   51.89   35.50
  17  -3  -1   57.49   36.90
 -17   3   1   51.29   33.70
  16  -3  -1   -1.10   34.10
 -16   3   1   53.19   31.90
  15  -3  -1   47.50   33.20
 -15   3   1    4.90   28.70
  14  -3  -1   19.00   31.20
 -14   3   1   64.49   27.60
  13  -3  -1   30.30   29.50
 -13   3   1  -25.50   24.20
  12  -3  -1   64.69   28.30
 -12   3   1   95.79   24.80
  11  -3  -1   22.70   26.30
 -11   3   1   10.90   21.50
  10  -3  -1  381.06   30.10
 -10   3   1  413.46   32.60
   9  -3  -1   -9.90   21.60
  -9   3   1   11.80   17.90
  -9   3   1    6.10   18.90
   8  -3  -1  -18.00   19.30
   8  -3  -1   18.40   20.20
  -8   3   1   17.80   17.80
   7  -3  -1  127.49   20.00
   7  -3  -1  159.68   22.50
  -7   3   1  135.29   19.90
   6  -3  -1  520.85   30.10
   6  -3  -1  511.55   33.10
  -6   3   1  502.85   29.30
   5  -3  -1   13.60   17.30
   5  -3  -1   53.99   18.80
  -5   3   1   41.30   16.10
   4  -3  -1  284.47   20.90
   4  -3  -1  309.17   22.90
   4  -3  -1  290.27   22.20
  -4   3   1  245.38   19.20
   3  -3  -1  207.58   18.70
   3  -3  -1  227.38   18.00
   3  -3  -1  187.08   19.80
  -3   3   1  203.58   17.70
   2  -3  -1  116.69   16.90
   2  -3  -1  121.79   15.90
   2  -3  -1   88.19   17.50
  -2   3   1  146.19   16.30
   1  -3  -1  179.38   16.20
   1  -3  -1  139.09   17.10
   1  -3  -1  182.38   17.60
   0  -3  -1  138.29   14.80
   0  -3  -1  116.59   15.40
   0  -3  -1  134.99   15.70
  -1  -3  -1  -12.20   14.00
  -1  -3  -1   19.70   13.30
  -1  -3  -1   -4.30   13.40
  -2  -3  -1   66.29   13.10
  -2  -3  -1   63.79   13.90
  -2  -3  -1   77.99   13.30
  -3  -3  -1  256.27   19.50
  -3  -3  -1  304.27   19.50
  -3  -3  -1  254.17   16.80
  -4  -3  -1  177.58   17.10
  -4  -3  -1  142.39   14.70
  -4  -3  -1  167.18   15.30
  -4  -3  -1  181.28   13.70
  -5  -3  -1    5.30   11.60
  -5  -3  -1    7.40   12.80
  -5  -3  -1   23.50   13.10
  -5  -3  -1   10.40   15.30
  -6  -3  -1   93.89   16.30
  -6  -3  -1  115.99   15.40
  -6  -3  -1   91.39   12.90
  -6  -3  -1   61.39   13.70
  -7  -3  -1  586.64   25.80
  -7  -3  -1  550.54   25.40
  -7  -3  -1  542.95   24.30
  -7  -3  -1  558.64   26.60
  -8  -3  -1  126.49   17.00
  -8  -3  -1  143.79   18.10
  -8  -3  -1  157.08   15.20
  -8  -3  -1  131.19   16.30
  -9  -3  -1  228.88   17.90
  -9  -3  -1  198.78   18.70
  -9  -3  -1  188.38   19.50
  -9  -3  -1  190.18   19.80
 -10  -3  -1   -7.60   17.50
 -10  -3  -1   21.80   16.80
 -10  -3  -1   22.80   17.20
 -10  -3  -1   32.20   17.60
 -11  -3  -1 1003.10   37.70
 -11  -3  -1  941.81   38.20
 -11  -3  -1  994.30   37.00
 -11  -3  -1  929.61   37.30
 -12  -3  -1  157.38   20.60
 -12  -3  -1  169.78   21.30
 -12  -3  -1  215.98   22.40
 -12  -3  -1  165.28   21.10
 -13  -3  -1  -17.80   19.50
 -13  -3  -1    2.90   20.90
 -13  -3  -1  -32.60   18.60
 -14  -3  -1  -26.80   20.70
 -14  -3  -1    2.20   22.60
 -14  -3  -1   -0.70   20.50
 -15  -3  -1   36.80   23.20
 -15  -3  -1   -6.90   20.60
 -16  -3  -1   31.50   23.90
 -16  -3  -1   11.00   21.90
 -17  -3  -1    3.80   22.80
 -17  -3  -1   -6.20   25.20
  16  -4  -1   83.49   39.30
  15  -4  -1  -31.00   36.10
  14  -4  -1   47.30   35.20
  13  -4  -1  -16.30   33.30
  12  -4  -1   18.60   31.70
  11  -4  -1   -1.10   30.10
  10  -4  -1   72.19   30.30
   9  -4  -1    2.90   26.90
  -9   4   1   31.90   23.00
   8  -4  -1  211.98   28.70
  -8   4   1  146.59   23.80
   7  -4  -1   80.79   20.90
   7  -4  -1   62.79   25.10
   7  -4  -1   54.19   22.00
  -7   4   1   93.39   21.30
   6  -4  -1   13.50   21.60
   6  -4  -1   28.50   20.90
   6  -4  -1    3.10   23.00
  -6   4   1   26.60   18.50
   5  -4  -1  369.46   25.50
   5  -4  -1  327.17   22.70
   5  -4  -1  355.06   27.20
  -5   4   1  316.47   23.40
   4  -4  -1   -3.60   15.90
   4  -4  -1  -11.60   20.10
   4  -4  -1  -32.10   18.00
  -4   4   1   36.90   16.90
   3  -4  -1  -11.20   18.10
   3  -4  -1  -19.00   18.50
   3  -4  -1   16.80   15.60
  -3   4   1   -7.40   28.30
   2  -4  -1   -6.60   17.70
   2  -4  -1   -5.30   17.60
   2  -4  -1    6.30   14.90
   1  -4  -1  263.67   20.30
   1  -4  -1  247.58   18.10
   1  -4  -1  232.78   21.10
   0  -4  -1  -12.40   13.80
   0  -4  -1   -7.30   15.50
   0  -4  -1   -4.10   16.60
  -1  -4  -1   47.00   14.20
  -1  -4  -1   68.09   15.50
  -1  -4  -1   45.30   16.90
  -2  -4  -1  129.89   18.00
  -2  -4  -1   69.09   13.60
  -2  -4  -1  123.19   15.50
  -3  -4  -1   80.59   14.60
  -3  -4  -1   51.69   17.20
  -3  -4  -1   35.30   13.50
  -4  -4  -1   31.40   13.20
  -4  -4  -1   43.40   17.80
  -4  -4  -1   12.40   13.10
  -4  -4  -1   53.29   18.50
  -5  -4  -1  669.23   30.20
  -5  -4  -1  670.03   30.90
  -5  -4  -1  609.34   25.00
  -6  -4  -1  447.56   23.30
  -6  -4  -1  488.75   27.60
  -6  -4  -1  483.05   28.90
  -7  -4  -1   90.59   19.10
  -7  -4  -1   46.10   15.60
  -7  -4  -1   81.59   19.70
  -8  -4  -1  184.18   21.10
  -8  -4  -1  144.89   17.40
  -8  -4  -1  168.48   21.90
  -9  -4  -1   60.99   17.10
  -9  -4  -1   64.79   20.90
  -9  -4  -1   81.39   18.90
 -10  -4  -1   17.00   19.00
 -10  -4  -1   60.39   16.80
 -10  -4  -1    6.30   18.20
 -10  -4  -1   30.40   19.60
 -11  -4  -1  136.39   22.20
 -11  -4  -1  146.49   18.60
 -11  -4  -1  139.69   21.70
 -11  -4  -1  169.18   21.60
 -12  -4  -1  -26.10   20.70
 -12  -4  -1   -4.10   20.90
 -12  -4  -1    2.70   17.20
 -12  -4  -1  -16.50   19.50
 -13  -4  -1   51.59   21.20
 -13  -4  -1   43.50   19.10
 -13  -4  -1  -13.00   21.20
 -14  -4  -1   22.00   24.60
 -14  -4  -1  -15.60   21.10
 -14  -4  -1  -15.00   18.40
 -15  -4  -1   12.50   19.40
 -15  -4  -1   32.70   22.80
  13  -5  -1    7.10   36.50
  12  -5  -1   36.20   35.60
  12  -5  -1    2.60   30.10
  11  -5  -1   10.80   28.20
  11  -5  -1   63.49   35.30
  10  -5  -1  -35.60   32.30
  10  -5  -1   36.90   26.70
   9  -5  -1   46.90   31.70
   8  -5  -1   14.20   29.20
   7  -5  -1   93.19   29.50
   6  -5  -1  522.25   42.10
   5  -5  -1  289.57   29.00
   5  -5  -1  300.87   30.50
   4  -5  -1    3.20   23.10
   4  -5  -1    8.60   24.10
   3  -5  -1   21.50   21.60
   3  -5  -1  -21.70   24.00
   2  -5  -1   85.79   21.50
   2  -5  -1   64.69   18.30
   2  -5  -1   66.79   24.30
   1  -5  -1   72.99   23.50
   1  -5  -1   14.00   16.90
   1  -5  -1   22.80   19.90
   0  -5  -1   21.30   18.20
   0  -5  -1   32.80   16.20
   0  -5  -1   17.90   22.70
  -1  -5  -1   61.99   16.20
  -1  -5  -1   53.29   18.00
  -1  -5  -1   16.60   22.10
  -2  -5  -1   82.39   15.90
  -2  -5  -1  123.49   17.40
  -2  -5  -1  107.19   23.50
  -3  -5  -1  264.77   25.50
  -4  -5  -1    9.30   22.30
  -4  -5  -1   44.80   22.20
  -5  -5  -1  107.69   23.50
  -5  -5  -1   92.49   23.60
  -6  -5  -1  214.28   24.60
  -6  -5  -1  238.48   24.70
  -7  -5  -1  -25.90   22.00
  -7  -5  -1   -7.20   23.50
  -8  -5  -1   38.80   22.30
  -8  -5  -1   -7.40   24.30
  -9  -5  -1   68.39   25.20
  -9  -5  -1   71.59   22.70
 -10  -5  -1   37.10   25.70
 -10  -5  -1   46.10   22.40
 -11  -5  -1  -17.40   26.10
 -11  -5  -1   -7.80   21.20
 -12  -5  -1  -11.10   27.00
 -12  -5  -1   55.99   21.80
 -13  -5  -1   50.49   29.00
 -13  -5  -1   53.29   22.00
   9  -6  -1   25.40   33.30
   8  -6  -1   11.20   30.40
   7  -6  -1  126.49   30.50
   6  -6  -1   61.89   28.40
   5  -6  -1  -22.20   25.90
   4  -6  -1   79.79   25.20
   3  -6  -1  216.48   26.00
   2  -6  -1   -4.70   31.30
   2  -6  -1   -0.60   21.90
   1  -6  -1  362.26   33.90
   1  -6  -1  328.87   25.30
   0  -6  -1   60.69   28.90
   0  -6  -1   75.09   20.40
  -1  -6  -1  -20.20   18.60
  -1  -6  -1   10.00   18.10
  -1  -6  -1   -9.40   28.20
  -2  -6  -1   29.40   28.50
  -3  -6  -1  128.89   28.40
  -4  -6  -1   67.89   28.10
  -4  -6  -1   97.29   26.90
  -5  -6  -1    9.70   28.10
  -5  -6  -1   21.40   25.40
  -6  -6  -1   55.69   25.50
  -6  -6  -1   34.80   28.60
  -7  -6  -1   32.60   28.00
  -7  -6  -1    6.30   24.20
  -8  -6  -1   82.09   25.00
  -8  -6  -1  176.98   30.90
  -9  -6  -1  153.68   29.70
  -9  -6  -1   47.10   24.80
  -6  -6   2   17.10   22.30
  -6  -6   2   13.30   21.50
  -5  -6   2   50.99   22.90
  -4  -6   2  148.59   25.10
  -3  -6   2  231.18   27.20
  -2  -6   2   29.10   25.00
  -1  -6   2   13.10   25.50
   0  -6   2  -37.90   26.90
   1  -6   2   99.79   20.40
   1  -6   2   90.49   29.80
   2  -6   2  -14.50   28.00
   2  -6   2   11.30   21.00
   3  -6   2  220.68   25.50
   4  -6   2  -34.70   23.10
   5  -6   2   21.10   25.80
   6  -6   2  -17.70   26.70
   7  -6   2   54.79   30.80
   8  -6   2   20.50   30.40
   9  -6   2   10.20   32.00
 -14  -5   2  -17.40   21.90
 -14  -5   2    1.00   17.60
 -13  -5   2   43.10   17.10
 -13  -5   2   72.09   21.70
 -12  -5   2  106.19   17.90
 -12  -5   2  149.88   21.40
 -11  -5   2  -25.00   21.20
 -11  -5   2    8.90   16.50
 -10  -5   2   14.30   17.60
 -10  -5   2   17.30   20.90
  -9  -5   2  115.99   21.20
  -6  -5   2   52.59   18.00
  -5  -5   2    4.40   18.20
  -4  -5   2  116.59   19.20
  -3  -5   2  281.57   22.10
  -2  -5   2   -7.40   19.10
  -1  -5   2  -37.50   19.50
   0  -5   2  105.99   14.90
   0  -5   2  141.79   17.80
   0  -5   2  129.19   22.20
   1  -5   2   -5.50   22.20
   1  -5   2    9.10   17.70
   1  -5   2   14.90   14.50
   2  -5   2  -20.00   18.90
   2  -5   2   15.70   15.60
   2  -5   2    0.40   22.90
   3  -5   2   -7.10   16.60
   3  -5   2   15.30   23.20
   3  -5   2    6.90   21.60
   4  -5   2  -40.80   22.30
   4  -5   2  -25.60   24.00
   5  -5   2   13.10   26.10
   5  -5   2    8.10   25.10
   6  -5   2    3.70   26.90
   7  -5   2  130.69   29.40
   8  -5   2    5.80   29.00
   9  -5   2  118.29   32.50
  10  -5   2   40.10   32.70
  11  -5   2    4.10   34.80
  12  -5   2    3.00   36.50
  13  -5   2   70.89   39.50
 -16  -4   2  -14.40   19.90
 -16  -4   2   33.60   23.20
 -15  -4   2  127.99   23.10
 -15  -4   2  118.09   20.60
 -14  -4   2   63.79   21.50
 -14  -4   2   34.30   18.20
 -13  -4   2   13.80   16.00
 -13  -4   2   67.69   19.90
 -12  -4   2   -9.20   14.70
 -12  -4   2  -24.20   18.00
 -11  -4   2  109.79   16.10
 -11  -4   2  148.69   18.90
 -10  -4   2   19.70   14.80
 -10  -4   2    6.70   15.50
  -9  -4   2    2.30   14.40
  -9  -4   2    1.50   14.90
  -8  -4   2   82.59   14.30
  -3  -4   2   58.19   13.80
  -2  -4   2  373.56   22.20
  -1  -4   2   71.09   15.30
  -1  -4   2   79.49   13.30
   0  -4   2   44.70   15.80
   0  -4   2   40.40   14.40
   0  -4   2   38.90   12.30
   1  -4   2   16.30   15.80
   1  -4   2    8.80   15.70
   1  -4   2    2.90   13.00
   2  -4   2  210.78   17.10
   2  -4   2  240.68   20.50
   2  -4   2  196.58   20.50
   3  -4   2   -7.40   14.80
   3  -4   2   29.20   18.80
   3  -4   2   13.20   17.90
   4  -4   2   28.50   19.80
   4  -4   2  -27.60   18.60
   4  -4   2    7.60   15.70
  -5   4  -2  221.08   27.70
   5  -4   2  238.98   25.60
   5  -4   2  189.48   20.00
   5  -4   2  241.68   24.50
   6  -4   2   30.50   21.70
   6  -4   2   10.60   22.60
   7  -4   2  288.57   27.20
   7  -4   2  305.27   28.80
   8  -4   2  124.49   27.80
   9  -4   2  104.99   28.40
  10  -4   2   68.99   29.50
  11  -4   2   65.29   31.10
  12  -4   2   79.29   32.80
  13  -4   2  127.29   35.10
  14  -4   2  110.29   36.60
  15  -4   2   85.99   37.90
 -18  -3   2   31.90   21.20
 -18  -3   2    9.10   22.40
 -17  -3   2  -11.70   19.00
 -17  -3   2    5.00   21.30
 -16  -3   2  111.79   22.00
 -16  -3   2   75.09   19.20
 -16  -3   2   83.29   27.20
 -15  -3   2   23.60   17.50
 -15  -3   2   16.60   19.10
 -15  -3   2  -13.30   23.60
 -14  -3   2   90.79   19.30
 -14  -3   2  145.49   18.40
 -14  -3   2  121.89   19.10
 -13  -3   2   75.89   16.30
 -13  -3   2   36.00   17.10
 -13  -3   2   49.10   17.70
 -12  -3   2   11.70   15.20
 -12  -3   2  -33.50   15.50
 -12  -3   2  -23.60   13.80
 -11  -3   2   23.20   12.70
 -11  -3   2   25.20   14.90
 -11  -3   2    9.90   14.20
 -10  -3   2  307.77   21.80
  -9  -3   2   22.00   12.40
  -9  -3   2    8.30   13.60
  -8  -3   2   43.10   12.20
  -8  -3   2   35.90   12.30
  -7  -3   2  157.08   12.20
  -2  -3   2   35.50   10.80
  -1  -3   2   22.30   11.80
   0  -3   2    3.90   10.80
   0  -3   2   -4.10   12.80
   0  -3   2   -0.40   12.50
   1  -3   2  156.68   13.90
   1  -3   2  146.59   15.30
   1  -3   2  136.59   15.90
   2  -3   2  290.97   19.60
   2  -3   2  330.87   20.30
   2  -3   2  289.97   23.00
  -3   3  -2  189.28   16.90
   3  -3   2  161.38   18.30
   3  -3   2  172.98   17.60
   3  -3   2  210.08   16.60
  -4   3  -2  582.84   28.40
   4  -3   2  594.54   29.80
   4  -3   2  582.94   29.40
   4  -3   2  505.45   26.40
  -5   3  -2  988.80   35.50
   5  -3   2  969.50   35.90
   5  -3   2  982.60   38.20
  -6   3  -2  187.78   20.50
   6  -3   2  209.58   20.90
   6  -3   2  212.28   22.50
  -7   3  -2  108.09   19.80
   7  -3   2  125.39   22.20
   7  -3   2  134.29   20.50
  -8   3  -2 1571.44   51.09
   8  -3   2 1486.05   49.00
   8  -3   2 1648.44   53.59
  -9   3  -2   77.59   22.10
   9  -3   2   76.89   25.00
 -10   3  -2  612.04   38.80
  10  -3   2  626.34   43.10
 -11   3  -2   46.30   25.60
  11  -3   2   38.10   27.80
 -12   3  -2  230.88   30.40
  12  -3   2  233.08   32.70
 -13   3  -2   56.69   28.60
  13  -3   2   71.39   31.90
 -14   3  -2   20.70   30.10
  14  -3   2   20.90   32.10
 -15   3  -2   77.39   33.20
  15  -3   2   83.79   35.50
 -16   3  -2  -33.80   33.00
  16  -3   2    3.10   35.50
 -17   3  -2    1.20   39.00
  17  -3   2   68.49   39.20
 -19  -2   2   35.20   22.80
 -19  -2   2   20.10   24.50
 -18  -2   2   31.20   22.80
 -18  -2   2  -12.50   21.10
 -17  -2   2   76.79   22.40
 -17  -2   2   67.49   22.90
 -16  -2   2  100.79   21.10
 -16  -2   2   35.90   20.80
 -15  -2   2   81.39   20.20
 -15  -2   2  105.29   20.90
 -14  -2   2   -2.50   18.50
 -14  -2   2   -3.90   17.30
 -13  -2   2   83.69   16.10
 -13  -2   2  107.49   17.90
 -13  -2   2  122.89   19.00
 -12  -2   2   15.20   13.90
 -12  -2   2   -8.50   14.90
 -12  -2   2   29.50   16.30
 -11  -2   2  111.49   14.40
 -11  -2   2  146.49   15.60
 -11  -2   2  129.39   16.10
 -10  -2   2   -2.10   13.00
 -10  -2   2   20.20   11.80
 -10  -2   2   11.80   13.00
  -9  -2   2   88.29   12.80
  -9  -2   2   91.99   12.00
  -9  -2   2   84.19   13.00
  -8  -2   2    3.40   11.30
  -8  -2   2  -13.20   10.50
  -8  -2   2    7.10   10.70
  -7  -2   2   98.89   10.80
  -7  -2   2   95.69   10.80
  -7  -2   2   90.99   11.70
  -6  -2   2   15.20   10.30
  -1  -2   2  496.45   16.90
   0  -2   2  423.36   15.90
   0  -2   2  375.66   17.90
   0  -2   2  388.06   17.50
   1  -2   2  213.88   14.30
   1  -2   2  196.08   15.80
   1  -2   2  202.78   13.80
  -2   2  -2   12.10   11.60
   2  -2   2   10.70   11.20
   2  -2   2    3.00   13.10
   2  -2   2  -10.70   12.60
  -3   2  -2  329.07   21.10
   3  -2   2  338.77   19.80
   3  -2   2  344.77   23.40
   3  -2   2  348.97   22.90
  -4   2  -2  500.05   26.00
   4  -2   2  501.55   26.50
   4  -2   2  521.95   27.50
  -5   2  -2 2339.37   60.59
   5  -2   2 2250.57   60.39
   5  -2   2 2247.48   61.39
  -6   2  -2 1893.51   55.89
  -6   2  -2 1966.00   53.99
   6  -2   2 1968.80   54.39
   6  -2   2 1897.21   54.59
  -7   2  -2  260.17   20.60
  -7   2  -2  257.77   21.40
   7  -2   2  241.48   22.30
   7  -2   2  196.88   25.30
  -8   2  -2  398.96   28.00
  -8   2  -2  375.66   28.50
   8  -2   2  437.16   31.60
  -9   2  -2  199.18   22.10
  -9   2  -2  235.88   22.70
   9  -2   2  270.57   24.10
 -10   2  -2  121.49   21.00
 -10   2  -2   83.39   20.90
  10  -2   2   99.49   23.10
 -11   2  -2  128.89   22.60
 -11   2  -2  158.68   23.60
  11  -2   2  139.69   26.50
 -12   2  -2   10.80   23.70
 -12   2  -2   27.20   23.70
  12  -2   2   30.20   26.60
 -13   2  -2  650.43   44.50
  13  -2   2  640.64   45.60
 -14   2  -2  374.06   33.70
  14  -2   2  374.36   36.50
 -15   2  -2   24.90   29.00
  15  -2   2    0.40   31.40
 -16   2  -2   52.99   31.40
  16  -2   2   13.40   32.40
 -17   2  -2   17.90   33.80
  17  -2   2   -6.30   34.60
 -18   2  -2   40.10   35.20
 -20  -1   2  -27.40   24.80
 -20  -1   2    8.60   25.80
 -19  -1   2  -20.90   24.10
 -19  -1   2    9.10   24.60
 -18  -1   2   -8.80   22.70
 -18  -1   2    6.10   23.40
 -17  -1   2  115.79   24.50
 -17  -1   2  150.28   24.70
 -16  -1   2    0.30   21.10
 -16  -1   2    0.60   21.60
 -15  -1   2   12.20   20.20
 -15  -1   2   42.60   20.60
 -14  -1   2  796.82   36.20
 -14  -1   2  714.83   36.50
  13   1  -2    5.00   18.70
 -13  -1   2   -4.00   14.20
 -13  -1   2   -1.60   17.50
 -13  -1   2    1.90   17.50
  12   1  -2  -15.00   16.80
 -12  -1   2   -7.20   13.00
 -12  -1   2   15.20   16.20
 -12  -1   2    8.00   16.10
  11   1  -2  579.44   29.10
 -11  -1   2  613.44   28.60
 -11  -1   2  620.94   28.60
 -11  -1   2  603.24   25.80
 -10  -1   2  213.68   17.00
 -10  -1   2  139.09   14.30
 -10  -1   2  142.59   16.90
  -9  -1   2   61.59   14.00
  -9  -1   2   76.19   14.80
  -9  -1   2   55.89   12.60
  -8  -1   2  663.23   26.80
  -8  -1   2  668.33   24.80
  -8  -1   2  649.64   25.80
  -7  -1   2    5.80   12.60
  -7  -1   2   27.20   11.60
  -7  -1   2    1.10   11.40
  -6  -1   2 1026.90   29.30
  -6  -1   2 1024.80   29.00
  -6  -1   2 1015.70   29.30
  -5  -1   2 2201.68   52.79
  -5  -1   2 2165.18   52.89
  -5  -1   2 2271.17   52.89
  -4  -1   2  128.59    8.70
  -4  -1   2  125.09    8.50
  -4  -1   2  111.69    8.30
   0  -1   2  636.34   18.40
   0  -1   2  627.94   18.30
   0  -1   2  627.94   19.20
   0  -1   2  647.34   18.70
  -1   1  -2  102.29    9.60
   1  -1   2  124.19    9.90
   1  -1   2  103.59   10.90
   1  -1   2  120.79   11.50
  -2   1  -2 4947.60  112.59
   2  -1   2 4911.91  112.89
   2  -1   2 4728.23  113.09
   2  -1   2 4967.10  112.59
  -3   1  -2   78.09   12.20
  -3   1  -2   93.99   13.60
   3  -1   2   71.89   14.90
   3  -1   2   68.99   13.80
  -4   1  -2   30.70   12.80
  -4   1  -2   56.19   14.40
   4  -1   2   31.70   15.10
   4  -1   2   60.69   14.90
  -5   1  -2  117.29   15.30
  -5   1  -2  118.79   16.20
   5  -1   2  128.99   17.70
  -6   1  -2   35.80   16.90
  -6   1  -2    7.80   15.40
   6  -1   2   -1.90   18.30
  -7   1  -2   48.00   18.20
  -7   1  -2   75.19   16.70
   7  -1   2   31.30   20.40
  -8   1  -2  184.98   19.70
  -8   1  -2  210.18   21.40
   8  -1   2  221.88   23.60
  -9   1  -2   24.60   17.00
  -9   1  -2   52.49   19.00
   9  -1   2   66.89   21.90
 -10   1  -2   -3.30   18.10
 -10   1  -2   12.70   18.70
 -11   1  -2  125.69   22.00
 -11   1  -2   94.09   21.10
 -12   1  -2  -19.10   21.30
 -12   1  -2   23.90   21.70
 -13   1  -2   13.60   22.80
 -13   1  -2   37.70   23.80
  13  -1   2   40.80   25.50
 -14   1  -2  -16.90   24.80
 -14   1  -2    5.40   23.10
  14  -1   2    0.60   26.20
 -15   1  -2  -10.90   23.90
 -15   1  -2    2.10   26.70
  15  -1   2  -29.50   28.00
 -16   1  -2   24.00   29.20
  16  -1   2   17.80   30.10
 -17   1  -2   58.59   31.20
 -18   1  -2   71.19   32.70
 -19   1  -2   33.80   33.70
 -20   0   2   53.69   27.80
 -20   0   2   49.70   27.30
 -19   0   2    5.90   26.10
 -19   0   2  -21.60   26.00
 -18   0   2  -12.90   24.50
 -18   0   2  -35.10   24.40
 -17   0   2   28.30   23.60
 -17   0   2   38.50   24.20
 -16   0   2   15.80   23.10
 -16   0   2   26.70   22.50
 -15   0   2    9.40   21.70
 -15   0   2    3.00   20.60
  14   0  -2   34.00   22.10
 -14   0   2   23.60   20.50
 -14   0   2   90.09   21.30
  13   0  -2  -50.49   19.10
 -13   0   2   -0.30   18.50
 -13   0   2   29.50   19.00
  12   0  -2   54.59   19.00
 -12   0   2   25.40   17.90
 -12   0   2    8.60   17.80
  11   0  -2  -11.30   16.90
 -11   0   2    5.80   16.10
 -11   0   2   -1.50   16.20
  10   0  -2 1477.65   46.60
 -10   0   2 1617.84   46.70
 -10   0   2 1602.84   47.10
   9   0  -2   -0.80   16.10
  -9   0   2   11.10   16.40
  -9   0   2   17.00   15.60
   8   0  -2    1.60   15.10
  -8   0   2   12.20   14.70
  -8   0   2   -5.30   15.50
   7   0  -2   -6.20   13.70
  -7   0   2   -4.60   13.10
  -7   0   2   -8.00   13.90
   6   0  -2 1046.50   32.50
  -6   0   2 1044.90   32.00
  -6   0   2 1081.29   32.30
  -6   0   2 1048.90   32.20
   5   0  -2    1.70   11.70
  -5   0   2    0.30   11.30
  -5   0   2   11.90   12.10
   4   0  -2   27.40   10.80
  -4   0   2   21.60   11.40
  -4   0   2    7.50    9.70
  -4   0   2   14.20   10.20
   3   0  -2    8.20    8.50
  -3   0   2    5.10    8.50
  -3   0   2   -5.70    8.90
  -3   0   2   -6.50    8.80
   2   0  -2  101.09    7.60
  -2   0   2  100.59    7.40
  -2   0   2  102.79    7.50
  -2   0   2  113.39    7.80
   1   0  -2    6.90    5.70
   1   0  -2    6.10    6.00
   1   0  -2   -3.30    5.10
  -1   0   2   -0.20    5.60
  -1   0   2    6.10    5.50
  -1   0   2   -0.50    5.20
  -1   0   2   -6.20    5.20
   0   0  -2   25.60    5.50
   0   0  -2   28.70    6.20
   0   0   2   36.70    5.80
   0   0   2   23.90    5.40
   0   0   2   35.40    6.20
   0   0   2   26.30    5.30
  -1   0  -2   -0.30    6.50
  -1   0  -2    9.90    7.60
  -1   0  -2   10.20    6.50
   1   0   2    0.50    7.20
   1   0   2   -4.90    6.50
   1   0   2  -10.20    7.00
  -2   0  -2  102.29   10.30
  -2   0  -2   94.19   11.10
  -2   0  -2  107.99    9.90
   2   0   2   96.19   10.60
   2   0   2  117.39   11.30
  -3   0  -2    7.80   12.30
  -3   0  -2    8.40   10.90
  -3   0  -2    5.30   11.50
   3   0   2   11.10   11.60
  -4   0  -2   21.10   13.30
  -4   0  -2   27.20   11.90
   4   0   2    1.60   13.80
  -5   0  -2   -4.60   13.70
  -5   0  -2   -7.50   11.90
   5   0   2   -1.20   14.10
  -6   0  -2   -3.50   15.00
  -6   0  -2   10.60   13.50
   6   0   2   43.90   15.90
  -7   0  -2  -21.10   16.90
  -7   0  -2  -13.20   15.00
   7   0   2   42.00   18.70
  -8   0  -2   21.60   17.80
  -8   0  -2   17.10   16.40
   8   0   2   22.40   18.80
  -9   0  -2    4.50   17.00
  -9   0  -2   17.30   17.10
   9   0   2   -6.30   19.10
 -10   0  -2  282.37   22.60
 -10   0  -2  267.37   22.00
  10   0   2  278.87   24.50
 -11   0  -2    5.20   18.40
 -11   0  -2    0.40   18.90
  11   0   2   25.50   22.00
 -12   0  -2   44.90   19.70
 -12   0  -2   24.60   20.60
  12   0   2   23.90   23.40
 -13   0  -2   27.70   22.00
 -13   0  -2  -13.20   21.40
  13   0   2  -14.20   25.60
 -14   0  -2  813.62   42.10
 -14   0  -2  914.11   44.20
  14   0   2  853.71   43.90
 -15   0  -2    8.20   24.20
 -15   0  -2  -22.40   24.00
 -16   0  -2  104.99   27.00
 -16   0  -2   30.10   27.00
 -17   0  -2   20.90   25.00
 -17   0  -2  -33.00   26.70
 -18   0  -2  305.57   41.60
 -18   0  -2  364.06   36.20
 -19   0  -2  -21.90   30.40
 -20   1   2   20.60   31.00
 -19   1   2  -29.50   28.30
 -18   1   2  -19.20   26.70
 -17   1   2  159.88   28.30
 -17   1   2  169.38   29.00
  16  -1  -2   37.10   27.90
 -16   1   2   43.80   24.90
 -16   1   2   19.00   25.20
  15  -1  -2   21.10   25.40
 -15   1   2    4.10   22.80
 -15   1   2   56.49   24.20
  14  -1  -2  825.62   44.20
 -14   1   2  817.72   42.10
 -14   1   2  785.12   40.40
  13  -1  -2  -17.20   21.70
 -13   1   2  -19.50   19.50
 -13   1   2  -14.30   20.00
  12  -1  -2  -20.40   19.80
 -12   1   2    9.10   18.10
 -12   1   2   13.00   19.40
  11  -1  -2  667.73   35.10
 -11   1   2  686.73   32.60
 -11   1   2  666.33   34.40
  10  -1  -2  173.48   20.60
 -10   1   2  146.49   20.40
 -10   1   2  169.48   19.00
   9  -1  -2   57.89   18.20
  -9   1   2   39.30   17.80
  -9   1   2   57.99   16.90
   8  -1  -2  638.24   31.70
  -8   1   2  649.54   29.60
  -8   1   2  676.43   30.40
   7  -1  -2   40.70   16.30
  -7   1   2  -11.30   14.50
  -7   1   2   21.60   15.80
   6  -1  -2 1032.10   34.90
  -6   1   2 1040.80   34.20
  -6   1   2 1094.79   34.90
   5  -1  -2 2140.89   55.29
  -5   1   2 2113.49   54.69
  -5   1   2 2147.09   54.79
   4  -1  -2   86.09   13.80
  -4   1   2   95.19   13.90
  -4   1   2   86.49   12.70
   3  -1  -2  112.19   13.60
   3  -1  -2  124.29   13.50
  -3   1   2  101.39   13.20
  -3   1   2  131.49   13.60
   2  -1  -2   19.40   12.10
   2  -1  -2   25.20   12.10
   2  -1  -2   16.80   12.10
  -2   1   2    4.50   11.10
  -2   1   2   26.50   11.20
   1  -1  -2 5190.18  120.39
   1  -1  -2 5225.28  120.69
   1  -1  -2 5228.68  120.59
  -1   1   2 5267.37  120.39
  -1   1   2 5346.47  120.69
   0  -1  -2  617.14   21.60
   0  -1  -2  598.44   21.30
   0  -1  -2  599.34   21.00
   0   1   2  593.04   21.20
  -1  -1  -2   86.49   10.90
  -1  -1  -2   91.59   10.80
  -1  -1  -2  109.99   12.20
  -1  -1  -2   92.99   12.30
   1   1   2  106.59   12.00
  -2  -1  -2 4699.23  111.39
  -2  -1  -2 4976.10  110.99
  -2  -1  -2 4774.72  111.19
  -2  -1  -2 4842.52  110.99
   2   1   2 4838.92  111.09
  -3  -1  -2  101.49   11.60
  -3  -1  -2  102.99   13.70
  -3  -1  -2   87.29   11.50
  -3  -1  -2   62.19   12.10
   3   1   2   75.09   12.40
  -4  -1  -2   35.70   11.80
  -4  -1  -2   40.50   11.80
  -4  -1  -2   44.90   13.40
  -4  -1  -2   43.80   11.70
   4   1   2   21.00   12.40
  -5  -1  -2  129.69   13.50
  -5  -1  -2  147.89   14.10
  -5  -1  -2  106.89   13.60
  -5  -1  -2  101.39   15.50
   5   1   2  110.79   14.40
  -6  -1  -2   44.30   15.00
  -6  -1  -2   29.20   13.00
  -6  -1  -2   52.69   14.40
  -6  -1  -2   34.80   15.60
   6   1   2   28.40   14.70
  -7  -1  -2   63.59   16.90
  -7  -1  -2   54.69   15.40
  -7  -1  -2   66.09   16.80
  -7  -1  -2   46.60   13.90
   7   1   2   68.49   16.10
  -8  -1  -2  140.19   15.60
  -8  -1  -2  174.88   17.70
  -8  -1  -2  199.58   18.60
   8   1   2  169.28   19.30
  -9  -1  -2   23.40   14.20
  -9  -1  -2   26.50   16.40
  -9  -1  -2   32.30   16.60
   9   1   2   55.09   18.10
 -10  -1  -2    9.20   16.90
 -10  -1  -2   -1.30   16.90
  10   1   2   20.70   19.30
 -11  -1  -2  100.59   20.40
 -11  -1  -2  150.28   20.60
  11   1   2   78.59   21.80
 -12  -1  -2   -7.20   19.70
 -12  -1  -2   25.20   19.80
  12   1   2  -14.00   22.40
 -13  -1  -2   20.70   21.10
 -13  -1  -2   24.70   21.50
 -14  -1  -2  -13.70   22.20
 -14  -1  -2   25.20   22.80
 -15  -1  -2   -5.30   23.40
 -15  -1  -2  -23.60   23.50
 -16  -1  -2  -20.20   24.50
 -16  -1  -2   -7.60   24.00
 -17  -1  -2  -19.10   25.70
 -17  -1  -2   19.00   26.00
 -18  -1  -2   30.20   27.60
 -18  -1  -2   -9.10   26.40
 -19  -1  -2   55.99   29.70
 -19  -1  -2   53.29   29.10
 -19   2   2   44.60   33.30
 -18   2   2   13.40   30.10
  17  -2  -2   95.29   33.40
 -17   2   2   66.49   29.40
  16  -2  -2   70.49   31.20
 -16   2   2   83.59   27.80
  15  -2  -2   76.89   29.20
 -15   2   2   59.69   25.20
  14  -2  -2   44.30   27.50
 -14   2   2    5.80   22.70
 -14   2   2   57.59   24.40
  13  -2  -2   99.09   27.00
 -13   2   2   82.19   23.30
 -13   2   2   96.49   23.10
  12  -2  -2   65.49   24.00
 -12   2   2    1.20   19.90
 -12   2   2   15.50   19.60
  11  -2  -2  144.69   24.00
 -11   2   2  117.69   20.40
 -11   2   2  107.69   21.00
  10  -2  -2    2.80   20.00
 -10   2   2   23.90   17.80
 -10   2   2   28.80   17.20
   9  -2  -2   75.69   20.00
  -9   2   2  114.89   18.30
  -9   2   2   92.39   17.60
   8  -2  -2  -37.70   17.70
  -8   2   2    4.60   15.70
  -8   2   2    3.40   15.60
   7  -2  -2   42.90   18.50
  -7   2   2   56.49   16.10
  -7   2   2   94.99   17.50
   6  -2  -2   49.10   17.80
   6  -2  -2   24.50   21.10
  -6   2   2   31.30   15.40
  -6   2   2   24.90   17.30
   5  -2  -2  169.18   18.80
   5  -2  -2  205.28   19.00
  -5   2   2  167.48   17.20
  -5   2   2  163.28   17.70
   4  -2  -2    1.20   15.50
   4  -2  -2   24.80   15.50
   4  -2  -2    2.40   15.10
  -4   2   2   -4.30   14.40
   3  -2  -2   31.40   14.10
   3  -2  -2   16.20   15.00
   3  -2  -2   10.80   14.50
  -3   2   2   44.90   13.90
   2  -2  -2   34.80   14.10
   2  -2  -2   33.70   13.90
   2  -2  -2   61.59   12.90
   2  -2  -2   37.50   14.10
  -2   2   2   43.50   13.60
   1  -2  -2  498.55   23.30
   1  -2  -2  543.55   23.80
   1  -2  -2  542.55   23.80
  -1   2   2  582.14   23.70
   0  -2  -2  360.66   20.80
   0  -2  -2  354.16   20.70
   0  -2  -2  396.16   21.20
   0   2   2  351.06   19.60
  -1  -2  -2  219.68   15.20
  -1  -2  -2  187.48   15.60
  -1  -2  -2  184.18   14.40
  -2  -2  -2   22.50   13.40
  -2  -2  -2   20.70   11.70
  -2  -2  -2   19.00   12.80
  -2  -2  -2   10.60   12.20
  -3  -2  -2  273.37   21.20
  -3  -2  -2  333.07   19.50
  -3  -2  -2  297.67   21.40
  -3  -2  -2  312.07   19.60
  -4  -2  -2  472.75   22.50
  -4  -2  -2  472.45   23.90
  -4  -2  -2  487.45   22.60
  -4  -2  -2  461.55   24.60
  -5  -2  -2 2155.58   55.19
  -5  -2  -2 2188.98   55.99
  -5  -2  -2 2130.69   56.99
  -5  -2  -2 2224.98   55.39
  -6  -2  -2 1849.42   51.19
  -6  -2  -2 1867.71   49.90
  -6  -2  -2 1935.91   50.09
  -6  -2  -2 1900.91   50.49
  -7  -2  -2  224.58   19.30
  -7  -2  -2  244.38   16.80
  -7  -2  -2  225.78   16.70
  -7  -2  -2  222.18   17.60
  -8  -2  -2  369.26   24.40
  -8  -2  -2  407.06   24.80
  -8  -2  -2  366.76   26.80
  -8  -2  -2  399.46   24.40
  -9  -2  -2  195.98   19.50
  -9  -2  -2  241.68   19.30
  -9  -2  -2  221.18   17.80
  -9  -2  -2  223.88   18.50
   9   2   2  173.48   22.80
 -10  -2  -2   68.39   18.30
 -10  -2  -2   88.99   18.20
 -10  -2  -2   85.89   18.10
 -10  -2  -2   85.09   16.50
  10   2   2   95.69   20.20
 -11  -2  -2  118.39   20.30
 -11  -2  -2  154.78   20.80
 -11  -2  -2  201.88   21.30
 -11  -2  -2  150.88   18.90
 -12  -2  -2   -0.80   20.20
 -12  -2  -2   -3.00   20.20
 -12  -2  -2    7.60   19.80
 -13  -2  -2  581.64   37.10
 -13  -2  -2  599.74   36.70
 -13  -2  -2  613.24   37.60
 -14  -2  -2  299.77   27.00
 -14  -2  -2  328.67   28.20
 -15  -2  -2   37.70   23.90
 -15  -2  -2   35.20   23.60
 -16  -2  -2  -27.60   23.40
 -16  -2  -2   22.90   26.40
 -17  -2  -2   16.40   26.90
 -17  -2  -2   28.20   25.10
 -18  -2  -2  -34.20   27.60
 -18  -2  -2   17.70   26.10
  18  -3  -2   14.60   37.20
 -18   3   2  -39.00   35.10
  17  -3  -2   10.00   37.10
 -17   3   2  -37.00   32.60
  16  -3  -2  110.29   35.20
 -16   3   2   95.19   33.60
  15  -3  -2   25.00   32.40
 -15   3   2   -9.40   29.20
  14  -3  -2  151.68   34.00
 -14   3   2  152.38   30.40
  13  -3  -2   78.89   30.10
 -13   3   2    0.20   26.10
  12  -3  -2  -11.40   26.60
 -12   3   2    6.40   24.30
  11  -3  -2   24.60   25.40
 -11   3   2   46.40   23.40
  10  -3  -2  347.27   29.50
 -10   3   2  373.46   28.20
 -10   3   2  316.37   29.00
   9  -3  -2   26.80   22.70
  -9   3   2   15.70   17.30
  -9   3   2   -1.90   19.50
   8  -3  -2   68.89   22.60
   8  -3  -2   57.79   19.90
  -8   3   2   43.60   18.80
   7  -3  -2  127.79   20.60
   7  -3  -2  119.39   21.90
  -7   3   2   92.29   18.70
   6  -3  -2  207.88   22.80
   6  -3  -2  228.58   21.80
   6  -3  -2  243.88   21.20
  -6   3   2  200.68   19.80
   5  -3  -2   -4.10   17.10
   5  -3  -2   36.80   19.00
   5  -3  -2  -13.10   16.60
  -5   3   2   13.30   15.90
   4  -3  -2   64.59   16.20
   4  -3  -2   64.99   16.80
   4  -3  -2   54.79   18.90
   4  -3  -2   74.69   17.60
  -4   3   2   63.39   16.20
   3  -3  -2  148.89   17.20
   3  -3  -2  138.49   18.30
   3  -3  -2  112.89   19.00
  -3   3   2  108.29   16.60
   2  -3  -2   51.79   15.30
   2  -3  -2    8.40   16.60
   2  -3  -2   35.00   16.50
  -2   3   2   38.90   14.80
   1  -3  -2   58.49   16.00
   1  -3  -2   29.00   16.70
   1  -3  -2   26.60   15.40
  -1   3   2   22.60   18.50
   0  -3  -2   -1.80   14.90
   0  -3  -2   -9.20   15.20
   0  -3  -2    9.80   14.80
  -1  -3  -2  192.78   17.10
  -1  -3  -2  180.28   16.70
  -1  -3  -2  157.78   16.60
  -2  -3  -2  280.87   18.60
  -2  -3  -2  304.87   22.10
  -2  -3  -2  312.57   19.20
  -3  -3  -2  187.28   18.30
  -3  -3  -2  186.68   16.80
  -3  -3  -2  194.38   16.90
  -3  -3  -2  210.18   15.80
  -4  -3  -2  463.55   26.20
  -4  -3  -2  480.15   24.20
  -4  -3  -2  470.85   24.20
  -4  -3  -2  515.45   23.20
  -5  -3  -2  949.21   32.90
  -5  -3  -2  985.70   34.20
  -5  -3  -2  992.00   32.40
  -5  -3  -2 1013.50   31.70
  -6  -3  -2  186.28   17.80
  -6  -3  -2  143.69   18.50
  -6  -3  -2  196.38   16.60
  -6  -3  -2  192.78   15.40
  -7  -3  -2  110.49   16.10
  -7  -3  -2  168.78   19.10
  -7  -3  -2  151.08   16.10
  -7  -3  -2  176.68   17.90
  -8  -3  -2 1494.35   43.60
  -8  -3  -2 1492.15   46.10
  -8  -3  -2 1492.25   44.50
  -8  -3  -2 1447.26   44.10
  -9  -3  -2  126.99   17.40
  -9  -3  -2  105.99   19.60
  -9  -3  -2   86.99   19.50
  -9  -3  -2  106.69   18.60
 -10  -3  -2  589.24   31.10
 -10  -3  -2  601.94   30.60
 -10  -3  -2  609.74   34.20
 -10  -3  -2  569.44   32.60
 -11  -3  -2   51.79   19.90
 -11  -3  -2   81.09   20.60
 -11  -3  -2   47.50   20.20
 -11  -3  -2   75.19   19.90
 -12  -3  -2  218.48   23.30
 -12  -3  -2  196.88   23.80
 -12  -3  -2  216.68   23.90
 -13  -3  -2   40.30   22.10
 -13  -3  -2   79.09   22.70
 -13  -3  -2   42.90   21.00
 -14  -3  -2   12.70   22.80
 -14  -3  -2  -10.60   21.10
 -15  -3  -2   46.00   24.80
 -15  -3  -2   82.79   23.60
 -16  -3  -2   -9.00   25.30
 -16  -3  -2    0.00   22.50
 -17  -3  -2   46.60   27.50
 -17  -3  -2   22.60   23.60
  16  -4  -2   47.90   39.80
  15  -4  -2  206.78   40.20
  14  -4  -2   94.39   36.70
  13  -4  -2  -53.49   32.20
  12  -4  -2    1.10   31.20
  11  -4  -2  185.88   33.20
 -11   4   2  145.89   41.60
  10  -4  -2  -37.90   28.30
 -10   4   2   26.70   24.40
   9  -4  -2   41.10   24.70
   9  -4  -2   -6.50   26.60
  -9   4   2   -7.80   22.20
   8  -4  -2  127.69   24.00
   8  -4  -2   60.99   27.00
  -8   4   2   89.59   22.60
   7  -4  -2   72.89   23.40
   7  -4  -2   75.29   26.10
   7  -4  -2  102.59   21.70
  -7   4   2  105.09   21.20
   6  -4  -2   28.60   20.90
   6  -4  -2   26.50   18.60
   6  -4  -2   19.80   23.00
  -6   4   2   29.70   18.80
   5  -4  -2    9.00   17.20
   5  -4  -2  -20.20   21.70
   5  -4  -2   -8.20   19.50
  -5   4   2   -0.90   17.90
   4  -4  -2  277.47   23.70
   4  -4  -2  238.98   20.70
   4  -4  -2  269.67   24.40
  -4   4   2  253.57   21.80
   3  -4  -2   58.49   17.40
   3  -4  -2   46.90   19.80
   3  -4  -2   85.09   20.10
  -3   4   2   78.49   17.30
   2  -4  -2  444.76   29.10
   2  -4  -2  367.66   25.30
   2  -4  -2  378.96   28.70
   1  -4  -2   79.79   18.70
   1  -4  -2   74.89   16.70
   1  -4  -2   46.00   17.40
   0  -4  -2   44.00   16.50
   0  -4  -2   42.20   15.30
   0  -4  -2   68.69   18.80
  -1  -4  -2   15.10   15.80
  -1  -4  -2  -20.50   15.00
  -1  -4  -2   17.30   17.60
  -2  -4  -2  220.38   19.70
  -2  -4  -2  209.28   17.90
  -2  -4  -2  221.68   17.90
  -3  -4  -2   37.60   15.10
  -3  -4  -2   14.70   15.30
  -3  -4  -2  -11.40   17.40
  -4  -4  -2   21.20   14.50
  -4  -4  -2   31.20   15.40
  -4  -4  -2   15.30   19.80
  -4  -4  -2   -3.20   18.90
  -5  -4  -2  253.17   21.60
  -5  -4  -2  240.28   18.90
  -5  -4  -2  222.38   17.50
  -5  -4  -2  265.77   22.60
  -6  -4  -2    2.00   18.50
  -6  -4  -2   18.60   19.70
  -6  -4  -2   16.90   16.60
  -6  -4  -2  -17.80   14.10
  -7  -4  -2  391.46   30.50
  -7  -4  -2  368.86   29.50
  -7  -4  -2  318.97   24.50
  -7  -4  -2  291.27   21.10
  -8  -4  -2  180.48   19.70
  -8  -4  -2  164.28   22.10
  -8  -4  -2  159.48   18.20
  -8  -4  -2  147.29   22.50
  -9  -4  -2   32.20   19.60
  -9  -4  -2   66.59   21.90
  -9  -4  -2   53.09   19.60
  -9  -4  -2   18.20   16.30
 -10  -4  -2   37.40   18.10
 -10  -4  -2   72.59   22.20
 -10  -4  -2   71.99   21.30
 -10  -4  -2   87.09   20.90
 -11  -4  -2   36.00   23.30
 -11  -4  -2   67.69   22.60
 -11  -4  -2    5.60   19.00
 -11  -4  -2   26.10   21.40
 -12  -4  -2   47.30   22.60
 -12  -4  -2   45.50   20.00
 -12  -4  -2   28.30   22.10
 -13  -4  -2  119.39   21.80
 -13  -4  -2   72.19   23.50
 -13  -4  -2   91.29   24.60
 -14  -4  -2   18.10   20.80
 -14  -4  -2   46.00   23.20
 -15  -4  -2  -34.70   23.20
 -15  -4  -2  -24.80   20.70
  14  -5  -2    7.50   39.30
  14  -5  -2  -25.40   33.00
  13  -5  -2   38.40   31.90
  13  -5  -2  108.79   38.70
  12  -5  -2  121.99   38.10
  12  -5  -2  187.38   32.50
  11  -5  -2    7.00   28.10
  11  -5  -2   40.30   35.60
  10  -5  -2   18.00   26.30
  10  -5  -2   44.20   33.30
   9  -5  -2   71.49   32.10
   9  -5  -2   85.69   25.20
   8  -5  -2  -26.10   29.30
   7  -5  -2  128.49   30.00
   6  -5  -2   40.80   27.00
   5  -5  -2   -2.00   33.00
   5  -5  -2  -35.00   23.80
   4  -5  -2  202.58   27.80
   4  -5  -2  147.29   25.80
   3  -5  -2  232.48   25.30
   3  -5  -2  362.96   28.80
   2  -5  -2    9.10   21.00
   2  -5  -2   13.60   21.30
   2  -5  -2    5.20   23.50
   1  -5  -2   32.00   23.70
   1  -5  -2  -11.20   19.80
   1  -5  -2   -5.00   17.70
   0  -5  -2  161.48   19.60
   0  -5  -2  190.18   21.70
   0  -5  -2  155.38   25.50
  -1  -5  -2   14.20   17.00
  -1  -5  -2   44.20   22.90
  -1  -5  -2   31.40   18.00
  -2  -5  -2  -11.40   17.40
  -2  -5  -2   -6.00   22.70
  -2  -5  -2    1.40   16.80
  -3  -5  -2    5.00   17.10
  -3  -5  -2    7.90   22.90
  -3  -5  -2   -2.70   15.70
  -4  -5  -2   14.20   24.60
  -4  -5  -2   -1.80   16.20
  -4  -5  -2    1.50   15.90
  -4  -5  -2    1.30   23.10
  -5  -5  -2   23.70   23.40
  -5  -5  -2   33.50   24.00
  -5  -5  -2  -18.00   15.50
  -6  -5  -2   30.40   24.30
  -6  -5  -2   -1.50   23.70
  -7  -5  -2  116.49   26.10
  -7  -5  -2  106.19   24.60
  -8  -5  -2    0.20   25.30
  -8  -5  -2   19.20   23.50
  -9  -5  -2   79.99   24.30
  -9  -5  -2  132.79   27.00
 -10  -5  -2   84.39   27.40
 -10  -5  -2   33.80   23.10
 -11  -5  -2   11.00   22.90
 -11  -5  -2   47.50   27.70
 -12  -5  -2  -34.00   23.00
 -12  -5  -2   29.70   29.30
 -13  -5  -2   28.80   23.60
  10  -6  -2   20.30   35.00
   9  -6  -2  269.87   37.60
   8  -6  -2  200.88   33.00
   7  -6  -2   -1.90   29.30
   6  -6  -2    9.30   28.20
   5  -6  -2   18.80   26.10
   4  -6  -2  111.89   26.40
   3  -6  -2  224.08   26.90
   2  -6  -2  -14.90   21.80
   1  -6  -2   27.90   22.20
   1  -6  -2   41.90   29.80
   0  -6  -2   31.60   29.40
   0  -6  -2   30.50   21.10
  -1  -6  -2   92.59   20.90
  -1  -6  -2  127.99   30.30
  -2  -6  -2  -16.40   18.70
  -2  -6  -2   -9.40   28.30
  -2  -6  -2   29.70   23.60
  -3  -6  -2  205.78   31.70
  -3  -6  -2  176.18   30.10
  -4  -6  -2  -22.70   28.50
  -4  -6  -2   23.30   28.20
  -5  -6  -2   42.40   27.10
  -5  -6  -2   29.80   29.30
  -6  -6  -2   41.50   28.90
  -6  -6  -2   13.00   26.50
  -7  -6  -2   60.69   27.10
  -7  -6  -2   62.09   30.90
  -8  -6  -2   25.80   25.60
  -8  -6  -2   38.50   30.40
  -9  -6  -2   66.59   30.50
  -9  -6  -2   37.50   25.80
  -4  -6   3   26.50   21.90
  -3  -6   3   22.60   22.60
  -2  -6   3  -26.40   23.80
  -1  -6   3   86.69   26.80
   0  -6   3   39.20   26.60
   1  -6   3    1.40   26.90
   1  -6   3   -5.40   16.30
   1  -6   3  -19.50   18.50
   2  -6   3   35.60   28.70
   2  -6   3   13.50   20.20
   3  -6   3   54.39   23.00
   3  -6   3  120.59   44.30
   4  -6   3   83.99   24.20
   5  -6   3   -2.10   26.00
   6  -6   3   38.10   28.20
   7  -6   3    0.80   28.10
   8  -6   3  -10.30   31.00
 -14  -5   3   13.40   16.50
 -14  -5   3   19.20   20.40
 -13  -5   3   16.20   15.60
 -13  -5   3   52.19   19.80
 -12  -5   3   -7.00   14.30
 -12  -5   3    7.10   18.30
  -4  -5   3   77.89   17.50
  -3  -5   3   -6.40   17.40
  -2  -5   3  132.29   20.10
  -1  -5   3   89.69   20.10
   0  -5   3  118.09   22.30
   0  -5   3  123.39   15.00
   1  -5   3   -3.70   14.80
   1  -5   3   42.00   18.20
   1  -5   3  -16.90   20.90
   2  -5   3   59.19   16.90
   2  -5   3   58.59   20.70
   2  -5   3   69.69   22.90
   3  -5   3   70.99   22.90
   3  -5   3  109.79   24.90
   3  -5   3   51.19   19.60
   4  -5   3   86.99   26.00
   4  -5   3   83.19   24.40
   5  -5   3  109.49   27.10
   5  -5   3  108.39   26.40
   6  -5   3   38.30   25.90
   7  -5   3   81.69   29.10
   8  -5   3  160.98   32.40
   9  -5   3   25.90   31.50
  10  -5   3  -13.50   32.30
  11  -5   3  -32.20   32.70
  12  -5   3   37.60   34.30
 -16  -4   3    9.00   23.10
 -16  -4   3   16.10   18.70
 -15  -4   3  155.78   20.30
 -15  -4   3  206.28   24.90
 -14  -4   3   29.60   17.10
 -14  -4   3   69.99   21.20
 -13  -4   3    6.20   18.90
 -13  -4   3    9.20   15.80
 -12  -4   3   -5.40   16.60
 -12  -4   3   -2.20   13.90
 -11  -4   3  202.48   16.20
 -11  -4   3  220.38   18.20
 -10  -4   3   24.90   13.20
 -10  -4   3   17.70   14.70
  -2  -4   3  308.67   20.40
  -1  -4   3  231.18   17.00
   0  -4   3  168.18   17.30
   0  -4   3  181.38   14.00
   0  -4   3  189.88   15.90
   1  -4   3   -9.90   12.60
   1  -4   3   15.60   16.10
   1  -4   3   24.30   16.00
   2  -4   3  389.86   28.10
   2  -4   3  310.27   22.70
   2  -4   3  361.06   26.90
   3  -4   3  -29.70   18.50
   3  -4   3  -13.80   14.50
   3  -4   3   -2.00   18.60
   4  -4   3   30.90   16.00
   4  -4   3   21.30   19.20
   4  -4   3   25.70   20.30
   5  -4   3   28.10   21.40
   5  -4   3  -23.40   16.40
   5  -4   3   15.00   20.80
   6  -4   3  234.58   25.00
   6  -4   3  243.98   26.20
   7  -4   3   32.10   23.90
   7  -4   3    1.60   24.70
   8  -4   3  571.34   41.20
   9  -4   3   -1.30   27.70
  10  -4   3   39.40   28.90
  11  -4   3  140.09   32.90
  12  -4   3  -15.10   32.40
  13  -4   3   81.79   34.90
  14  -4   3   70.59   36.40
  15  -4   3   78.99   38.80
 -18  -3   3   50.39   20.70
 -18  -3   3   -4.80   21.50
 -17  -3   3   17.00   20.70
 -17  -3   3   -9.90   18.20
 -16  -3   3  -10.30   18.40
 -16  -3   3  -42.20   16.70
 -15  -3   3   10.10   25.50
 -15  -3   3   45.60   16.80
 -15  -3   3   71.39   18.90
 -14  -3   3   22.10   17.30
 -14  -3   3   -3.50   16.70
 -14  -3   3   16.30   14.90
 -13  -3   3   66.29   16.70
 -13  -3   3   87.59   14.60
 -13  -3   3   96.89   16.50
 -12  -3   3   36.20   15.10
 -11  -3   3  156.58   15.40
 -10  -3   3   16.90   11.90
  -9  -3   3  453.15   20.40
  -1  -3   3   32.30   11.40
   0  -3   3   91.59   11.40
   0  -3   3   69.49   13.10
   0  -3   3   88.59   13.60
   1  -3   3  474.35   21.10
   1  -3   3  452.25   24.30
   1  -3   3  450.15   23.00
   2  -3   3  112.59   14.30
   2  -3   3  106.79   16.10
   2  -3   3  120.79   16.20
  -3   3  -3   21.30   15.20
   3  -3   3   39.10   13.80
   3  -3   3   42.10   16.50
   3  -3   3   20.10   15.80
  -4   3  -3   33.90   15.50
   4  -3   3   42.80   14.40
   4  -3   3   47.70   17.00
   4  -3   3   45.10   17.80
  -5   3  -3  206.68   19.30
   5  -3   3  219.38   20.10
   5  -3   3  213.08   18.10
   5  -3   3  214.88   21.80
  -6   3  -3  416.16   28.40
   6  -3   3  386.66   30.80
   6  -3   3  366.26   27.30
  -7   3  -3 1031.20   40.60
   7  -3   3 1104.79   40.50
   7  -3   3 1100.19   43.70
  -8   3  -3  145.89   22.10
   8  -3   3  152.28   25.50
   8  -3   3  111.99   21.10
  -9   3  -3  469.75   36.10
   9  -3   3  544.55   40.40
 -10   3  -3  112.09   24.90
  10  -3   3   97.49   28.20
 -11   3  -3   19.20   25.00
  11  -3   3    1.50   27.50
 -12   3  -3  141.39   28.80
  12  -3   3   69.39   30.60
 -13   3  -3  -39.50   27.50
  13  -3   3   22.40   32.20
 -14   3  -3   50.39   31.40
  14  -3   3  110.59   35.80
 -15   3  -3   66.59   34.40
  15  -3   3  114.29   36.90
  16  -3   3   13.40   36.50
 -19  -2   3   36.10   22.20
 -19  -2   3   51.89   23.60
 -18  -2   3    8.80   21.00
 -18  -2   3  -29.20   21.80
 -17  -2   3   33.70   20.70
 -17  -2   3   18.60   19.60
 -16  -2   3   52.89   20.50
 -16  -2   3   66.39   19.60
 -15  -2   3   22.50   19.50
 -15  -2   3   40.30   18.50
 -14  -2   3   13.50   14.80
 -14  -2   3   13.30   17.30
 -14  -2   3   -0.90   16.30
 -13  -2   3   26.20   16.20
 -13  -2   3   24.00   15.60
 -13  -2   3   23.30   13.80
 -12  -2   3  347.27   23.50
 -12  -2   3  365.96   21.60
 -12  -2   3  366.16   24.70
 -11  -2   3   81.69   14.60
 -11  -2   3   73.49   12.30
 -11  -2   3   87.89   13.80
 -10  -2   3    5.70   11.50
 -10  -2   3    2.00   12.50
 -10  -2   3   -0.30   10.90
  -9  -2   3   24.30   10.70
  -9  -2   3   18.50   11.40
  -9  -2   3    2.60   10.20
  -8  -2   3  820.62   25.90
  -8  -2   3  837.52   24.70
  -8  -2   3  816.32   24.70
  -7  -2   3   67.09   10.20
  -1  -2   3  156.78   12.60
   0  -2   3   75.19   11.00
   0  -2   3   87.59   10.10
   0  -2   3   59.29   10.70
   1  -2   3  121.19   11.50
   1  -2   3  122.09   12.90
   1  -2   3  118.09   13.20
  -2   2  -3 1168.28   33.60
   2  -2   3 1157.48   33.30
   2  -2   3 1174.88   34.90
   2  -2   3 1136.59   34.60
  -3   2  -3   -5.90   13.10
   3  -2   3   37.70   13.10
   3  -2   3   -8.00   14.70
   3  -2   3   12.70   14.80
  -4   2  -3  436.26   24.30
   4  -2   3  401.16   25.50
   4  -2   3  424.16   33.40
   4  -2   3  451.55   28.20
  -5   2  -3   23.40   15.30
   5  -2   3   12.00   17.60
   5  -2   3  -17.30   17.10
  -6   2  -3  143.69   18.60
   6  -2   3  144.29   20.10
   6  -2   3  129.29   18.30
  -7   2  -3 1246.58   40.80
  -7   2  -3 1216.98   41.00
   7  -2   3 1191.78   42.40
   7  -2   3 1233.98   42.80
  -8   2  -3   54.79   18.60
  -8   2  -3   59.99   17.90
   8  -2   3   64.79   20.50
  -9   2  -3   48.00   18.40
  -9   2  -3   13.10   19.00
   9  -2   3   16.50   21.70
 -10   2  -3   62.59   21.10
 -10   2  -3   75.19   21.00
  10  -2   3   73.09   23.70
 -11   2  -3  790.72   39.60
 -11   2  -3  859.51   42.90
  11  -2   3  916.71   46.10
 -12   2  -3  142.29   26.50
  12  -2   3  149.49   29.00
 -13   2  -3   -4.40   26.00
  13  -2   3    3.10   27.70
 -14   2  -3   25.20   27.40
  14  -2   3    0.00   30.20
 -15   2  -3   30.40   30.10
  15  -2   3   15.50   32.20
 -16   2  -3   31.40   30.80
  16  -2   3   42.50   34.10
 -17   2  -3   75.79   35.10
  17  -2   3   -5.10   35.30
 -18   2  -3   46.70   36.30
 -20  -1   3   39.70   26.60
 -20  -1   3   18.10   24.70
 -19  -1   3   24.30   24.00
 -19  -1   3   24.20   24.60
 -18  -1   3   90.39   23.70
 -18  -1   3   61.89   23.50
 -17  -1   3    9.30   21.20
 -17  -1   3    6.70   21.70
 -16  -1   3   36.20   21.30
 -16  -1   3    9.90   20.40
 -15  -1   3   41.60   20.20
 -15  -1   3   51.99   19.20
 -14  -1   3  437.46   31.20
 -14  -1   3  478.55   30.80
  13   1  -3  -15.10   17.20
 -13  -1   3  -14.20   16.00
 -13  -1   3   -6.10   17.00
 -13  -1   3   14.50   14.00
  12   1  -3  153.58   18.70
 -12  -1   3  163.08   18.70
 -12  -1   3  168.98   17.70
 -12  -1   3  148.59   15.60
  11   1  -3   50.89   15.80
 -11  -1   3   29.00   15.20
 -11  -1   3   45.10   14.70
 -11  -1   3   84.49   14.20
  10   1  -3   34.50   24.50
 -10  -1   3   72.59   14.50
 -10  -1   3   69.39   12.90
 -10  -1   3   58.89   15.00
  -9  -1   3   52.69   13.30
  -9  -1   3   57.59   12.80
  -9  -1   3   50.99   14.10
  -8  -1   3 2052.99   52.09
  -8  -1   3 2073.19   52.39
  -8  -1   3 2043.00   52.69
  -7  -1   3 1589.34   40.80
  -7  -1   3 1581.34   41.00
  -7  -1   3 1517.35   41.20
  -6  -1   3  319.27   17.00
  -6  -1   3  309.67   16.40
  -6  -1   3  331.97   16.90
  -5  -1   3   45.20    9.30
  -5  -1   3   45.70    8.60
  -5  -1   3   33.90    9.00
  -4  -1   3  958.90   24.70
   2   1  -3 1773.22   43.80
  -1  -1   3  118.09    8.40
  -1  -1   3  107.99    8.20
  -1  -1   3  119.09    8.00
  -1  -1   3  116.79    7.90
   0   1  -3   18.00    8.70
   0  -1   3   24.10    8.20
   0  -1   3   16.00    9.30
   0  -1   3    5.40    8.50
   0  -1   3   14.60    9.00
  -1   1  -3  372.06   16.90
   1  -1   3  311.77   18.00
   1  -1   3  379.26   17.70
   1  -1   3  313.27   17.90
   1  -1   3  363.96   16.80
  -2   1  -3  490.95   20.30
   2  -1   3  489.25   21.40
   2  -1   3  517.15   22.00
   2  -1   3  498.05   20.80
  -3   1  -3 2806.92   66.69
  -3   1  -3 2825.82   67.29
   3  -1   3 2725.93   66.89
   3  -1   3 2606.24   67.09
  -4   1  -3  456.65   23.60
  -4   1  -3  489.95   23.20
   4  -1   3  471.05   23.50
   4  -1   3  469.25   24.40
  -5   1  -3  138.19   16.20
  -5   1  -3  162.38   17.60
   5  -1   3  184.98   18.40
  -6   1  -3   46.30   18.00
  -6   1  -3   90.59   16.90
   6  -1   3   30.80   19.70
  -7   1  -3  112.49   18.10
  -7   1  -3  146.59   19.30
   7  -1   3  114.79   21.40
  -8   1  -3   92.79   18.60
  -8   1  -3   87.99   19.10
   8  -1   3   67.99   21.20
  -9   1  -3   10.10   18.50
  -9   1  -3   24.60   17.40
   9  -1   3   60.19   21.80
 -10   1  -3   35.40   19.30
 -10   1  -3   72.19   20.40
  10  -1   3   69.29   23.50
 -11   1  -3   -2.70   20.90
 -11   1  -3   14.50   19.70
  11  -1   3    0.00   24.70
 -12   1  -3  267.07   26.70
 -12   1  -3  268.67   27.00
 -13   1  -3   28.90   24.00
 -13   1  -3   45.30   23.70
 -14   1  -3  126.49   27.50
 -14   1  -3  138.49   26.90
 -15   1  -3  158.18   30.00
  15  -1   3  144.39   31.50
 -16   1  -3  329.47   34.80
  16  -1   3  346.57   36.50
 -17   1  -3   70.69   31.60
 -18   1  -3  -15.80   32.60
 -20   0   3    9.80   27.40
 -20   0   3  -66.29   25.70
 -19   0   3   42.30   26.60
 -19   0   3   47.60   27.30
 -18   0   3    8.10   25.10
 -18   0   3   54.69   26.10
 -17   0   3   -6.40   23.70
 -17   0   3   30.40   23.10
 -16   0   3   16.40   21.50
 -16   0   3   28.00   22.40
 -15   0   3  249.68   25.50
 -15   0   3  270.57   25.30
  14   0  -3  -53.19   20.30
 -14   0   3  -28.60   18.40
 -14   0   3   22.80   20.10
  13   0  -3  701.53   36.10
 -13   0   3  738.73   35.00
 -13   0   3  732.43   33.90
  12   0  -3  -20.30   17.90
 -12   0   3   -0.10   16.70
 -12   0   3    8.70   16.10
  11   0  -3  310.97   21.80
 -11   0   3  312.97   24.50
 -11   0   3  293.27   21.00
  10   0  -3    4.40   16.40
 -10   0   3   -5.90   14.60
 -10   0   3  -22.60   15.80
   9   0  -3 1620.44   46.90
  -9   0   3 1564.74   45.70
  -9   0   3 1654.53   46.60
   8   0  -3    3.10   15.10
  -8   0   3  -29.30   13.40
  -8   0   3  -30.60   20.90
  -8   0   3  -11.00   14.60
   7   0  -3   54.99   14.00
  -7   0   3   91.49   14.90
  -7   0   3   64.29   13.50
   6   0  -3  -13.60   12.10
  -6   0   3    6.00   12.10
  -6   0   3   -3.90   12.90
  -6   0   3   -0.60   10.80
   5   0  -3 1730.43   45.00
  -5   0   3 1716.03   44.60
  -5   0   3 1733.43   44.30
  -5   0   3 1761.52   44.70
   4   0  -3   -4.10   10.50
  -4   0   3  -15.20   10.70
  -4   0   3    3.80   10.80
  -4   0   3   12.50   10.20
   3   0  -3 6583.84  148.99
   3   0  -3 6448.85  150.18
  -3   0   3 6496.45  148.89
  -3   0   3 6659.73  148.99
  -3   0   3 6503.35  148.89
   2   0  -3    9.20    9.20
   2   0  -3   -4.10   10.50
   2   0  -3    0.50    8.40
  -2   0   3   -0.30    9.20
  -2   0   3    3.20    8.90
  -2   0   3   -6.90    8.70
   1   0  -3 2670.23   60.39
   1   0  -3 2538.75   60.19
  -1   0   3 2578.94   60.39
  -1   0   3 2545.85   60.49
  -1   0   3 2537.75   60.19
  -1   0   3 2560.64   60.39
   0   0  -3    7.50    9.70
   0   0  -3    1.10    7.80
   0   0   3    4.90    8.20
   0   0   3   -2.40    9.40
   0   0   3   -0.90    8.60
   0   0   3    7.10    9.50
  -1   0  -3 9740.43  222.28
  -1   0  -3 9917.71  222.48
   1   0   3 9999.00  222.28
   1   0   3 9806.72  222.38
   1   0   3 9725.73  222.38
  -2   0  -3   17.60   12.50
  -2   0  -3  -10.20   10.50
   2   0   3   -3.70   11.70
   2   0   3  -23.80   11.80
  -3   0  -3 1422.86   38.70
  -3   0  -3 1441.76   39.80
   3   0   3 1417.06   39.10
  -4   0  -3  -16.00   12.50
  -4   0  -3  -21.50   14.30
   4   0   3  -22.60   13.30
  -5   0  -3   27.10   13.90
  -5   0  -3   27.90   14.90
   5   0   3  -15.30   14.40
  -6   0  -3  -10.50   16.40
  -6   0  -3   -5.60   14.40
   6   0   3   14.80   17.20
  -7   0  -3   17.50   15.40
  -7   0  -3   10.40   17.30
   7   0   3    7.30   18.00
  -8   0  -3    6.80   18.00
  -8   0  -3  -12.20   16.10
   8   0   3   -0.40   19.00
  -9   0  -3    5.90   17.70
  -9   0  -3   29.90   17.40
   9   0   3   -1.70   19.70
 -10   0  -3   30.50   19.00
 -10   0  -3  -19.10   18.20
  10   0   3   27.30   20.80
 -11   0  -3  426.36   32.10
 -11   0  -3  321.27   25.90
  11   0   3  347.07   27.50
 -12   0  -3   13.20   21.40
 -12   0  -3    4.70   20.60
  12   0   3  -24.70   24.90
 -13   0  -3  318.77   28.50
 -13   0  -3  288.47   27.80
  13   0   3  342.67   31.10
 -14   0  -3   10.90   24.00
 -14   0  -3   -7.80   24.50
  14   0   3   53.19   28.70
 -15   0  -3    6.30   24.60
 -15   0  -3   24.70   25.60
 -16   0  -3   48.80   28.00
 -16   0  -3   80.19   27.00
 -17   0  -3   80.59   29.00
 -17   0  -3    6.10   29.00
 -18   0  -3  -11.90   30.30
 -20   1   3   14.90   30.60
 -19   1   3   10.90   28.60
 -18   1   3   85.79   27.50
 -18   1   3   62.79   28.40
 -17   1   3  -31.80   23.40
 -17   1   3    1.90   25.60
  16  -1  -3  -13.30   26.80
 -16   1   3   -8.00   23.50
 -16   1   3    7.90   22.90
  15  -1  -3   66.99   25.90
 -15   1   3   47.90   23.10
 -15   1   3   81.19   23.50
  14  -1  -3  411.36   30.50
 -14   1   3  483.35   35.30
 -14   1   3  457.45   34.20
  13  -1  -3  -30.70   20.50
 -13   1   3  -29.10   18.40
 -13   1   3   -5.40   19.80
  12  -1  -3  142.39   22.00
 -12   1   3  166.08   21.20
 -12   1   3  154.98   20.20
  11  -1  -3   81.69   19.30
 -11   1   3   44.30   17.80
 -11   1   3   66.79   17.50
  10  -1  -3   55.89   18.20
 -10   1   3   55.49   17.80
 -10   1   3   76.39   17.10
   9  -1  -3   52.59   18.20
  -9   1   3   39.80   17.10
  -9   1   3   60.69   16.50
   8  -1  -3 2112.79   57.99
  -8   1   3 2084.59   57.09
  -8   1   3 2088.29   56.79
   7  -1  -3 1590.64   46.10
  -7   1   3 1513.45   45.50
  -7   1   3 1596.64   46.10
   6  -1  -3  362.26   24.60
  -6   1   3  339.67   22.80
  -6   1   3  338.47   22.90
   5  -1  -3   16.00   14.00
  -5   1   3   20.60   13.80
  -5   1   3   20.00   13.60
   4  -1  -3 1028.20   32.50
  -4   1   3  995.80   31.40
  -4   1   3 1003.10   31.90
   3  -1  -3 1479.15   41.50
   3  -1  -3 1547.75   42.00
  -3   1   3 1479.55   40.60
  -3   1   3 1533.85   41.20
   2  -1  -3 1636.64   42.90
   2  -1  -3 1677.13   43.20
   2  -1  -3 1564.74   42.80
  -2   1   3 1644.74   43.10
  -2   1   3 1616.14   42.60
   1  -1  -3   84.49   12.60
   1  -1  -3   84.49   12.40
  -1   1   3   93.69   12.50
  -1   1   3  106.49   13.30
   0  -1  -3   27.10   12.10
   0  -1  -3   11.10   12.80
   0  -1  -3   21.40   12.20
   0  -1  -3   13.80   15.00
   0   1   3   27.40   12.30
   0   1   3   13.70   11.10
  -1  -1  -3  372.26   19.20
  -1  -1  -3  326.57   19.30
  -1  -1  -3  308.97   20.50
  -1  -1  -3  321.57   19.60
   1   1   3  389.76   21.80
   1   1   3  345.47   19.80
  -2  -1  -3  474.95   23.70
  -2  -1  -3  525.45   21.30
  -2  -1  -3  497.95   22.00
  -2  -1  -3  484.05   21.70
   2   1   3  509.85   22.50
  -3  -1  -3 2834.62   68.79
  -3  -1  -3 2927.91   69.99
  -3  -1  -3 2880.21   68.69
  -3  -1  -3 2770.82   68.99
   3   1   3 2812.92   69.09
  -4  -1  -3  427.56   23.90
  -4  -1  -3  477.55   22.90
  -4  -1  -3  514.15   22.10
  -4  -1  -3  441.16   21.80
   4   1   3  479.35   23.20
  -5  -1  -3  121.89   14.70
  -5  -1  -3  159.58   17.30
  -5  -1  -3  149.69   15.50
  -5  -1  -3  176.58   14.90
   5   1   3  142.59   16.80
  -6  -1  -3   53.09   18.00
  -6  -1  -3   45.00   15.30
  -6  -1  -3   34.40   17.50
  -6  -1  -3   52.29   15.20
   6   1   3   58.09   16.30
  -7  -1  -3  169.08   17.60
  -7  -1  -3  136.79   17.70
  -7  -1  -3  181.68   19.20
   7   1   3  170.18   18.40
  -8  -1  -3   91.79   16.90
  -8  -1  -3   59.09   18.20
  -8  -1  -3   84.79   16.80
   8   1   3   90.59   17.50
  -9  -1  -3   37.70   18.20
  -9  -1  -3   24.10   16.60
  -9  -1  -3   16.00   16.50
   9   1   3   25.80   18.60
 -10  -1  -3   76.09   19.20
 -10  -1  -3   35.10   18.30
 -10  -1  -3   89.59   19.60
  10   1   3   56.19   20.20
 -11  -1  -3   42.80   19.30
 -11  -1  -3    7.40   19.10
 -11  -1  -3   37.10   20.20
  11   1   3    9.30   21.50
 -12  -1  -3  306.87   26.30
 -12  -1  -3  269.47   24.60
 -12  -1  -3  269.87   25.70
  12   1   3  321.57   27.80
 -13  -1  -3   94.49   23.80
 -13  -1  -3   68.19   23.20
 -14  -1  -3  157.58   26.20
 -14  -1  -3  153.98   26.00
 -15  -1  -3  150.58   27.00
 -15  -1  -3  126.79   27.00
 -16  -1  -3  300.67   31.70
 -16  -1  -3  271.97   31.20
 -17  -1  -3   81.59   27.90
 -17  -1  -3   42.80   27.30
 -18  -1  -3    9.90   28.10
 -18  -1  -3   36.40   28.80
 -19   2   3  -39.70   31.80
 -18   2   3   12.70   31.30
  17  -2  -3   48.70   31.70
 -17   2   3   10.80   29.40
  16  -2  -3   83.39   31.30
 -16   2   3  103.29   29.10
  15  -2  -3   41.50   28.60
 -15   2   3   48.70   25.80
  14  -2  -3   32.80   26.70
 -14   2   3   13.70   22.10
 -14   2   3   23.80   24.10
  13  -2  -3   94.59   26.60
 -13   2   3   21.70   21.60
 -13   2   3   37.60   22.50
  12  -2  -3  387.36   29.90
 -12   2   3  314.77   25.30
 -12   2   3  393.46   28.00
  11  -2  -3   44.10   21.40
 -11   2   3   33.30   20.00
 -11   2   3   65.79   18.80
  10  -2  -3  -29.20   19.40
 -10   2   3    5.40   16.40
 -10   2   3   -3.20   18.10
   9  -2  -3   18.80   19.30
  -9   2   3    3.20   17.40
  -9   2   3   11.00   16.10
   8  -2  -3  919.91   37.40
  -8   2   3  922.71   36.10
  -8   2   3  920.81   35.40
   7  -2  -3   46.10   19.10
  -7   2   3   48.40   16.10
  -7   2   3   93.39   17.50
   6  -2  -3  170.88   20.20
  -6   2   3  176.98   19.20
  -6   2   3  172.08   18.50
   5  -2  -3  114.69   18.10
   5  -2  -3   77.99   18.10
   5  -2  -3  113.89   18.80
  -5   2   3  110.19   16.20
  -5   2   3   97.59   17.00
   4  -2  -3   25.30   16.10
   4  -2  -3   59.39   16.30
   4  -2  -3   85.69   17.10
  -4   2   3   26.40   14.70
  -4   2   3   41.90   15.30
   3  -2  -3  682.73   29.30
   3  -2  -3  719.33   27.50
   3  -2  -3  668.53   28.60
  -3   2   3  693.03   28.30
   2  -2  -3  365.16   23.30
   2  -2  -3  354.96   23.50
   2  -2  -3  391.16   23.30
  -2   2   3  366.56   23.50
   1  -2  -3  150.48   15.30
   1  -2  -3  119.19   15.50
   1  -2  -3  149.99   15.80
  -1   2   3  121.79   14.40
   0  -2  -3  108.19   15.50
   0  -2  -3   80.09   14.40
   0  -2  -3   67.79   13.90
   0   2   3   92.49   14.70
  -1  -2  -3   86.19   14.80
  -1  -2  -3   92.59   14.00
  -1  -2  -3   90.69   14.90
   1   2   3   92.79   14.10
  -2  -2  -3 1032.10   34.00
  -2  -2  -3 1050.19   33.10
  -2  -2  -3 1023.10   34.30
  -2  -2  -3 1168.98   33.50
   2   2   3 1093.39   33.00
  -3  -2  -3  -35.20   16.30
  -3  -2  -3   -1.90   13.40
  -3  -2  -3  -10.70   13.40
  -3  -2  -3   16.00   15.10
   3   2   3   13.30   14.40
  -4  -2  -3  437.46   23.70
  -4  -2  -3  406.06   24.40
  -4  -2  -3  409.16   27.30
  -4  -2  -3  391.26   23.60
   4   2   3  403.06   24.10
  -5  -2  -3   23.10   15.80
  -5  -2  -3    3.70   14.10
  -5  -2  -3    7.80   17.40
  -5  -2  -3    9.80   14.30
   5   2   3    3.70   15.10
  -6  -2  -3  124.49   17.90
  -6  -2  -3  127.99   16.80
  -6  -2  -3  124.49   15.80
  -6  -2  -3  118.29   16.10
   6   2   3  177.98   17.30
  -7  -2  -3 1247.28   38.50
  -7  -2  -3 1225.78   40.60
  -7  -2  -3 1214.48   38.90
  -7  -2  -3 1250.07   38.90
  -8  -2  -3   46.40   18.30
  -8  -2  -3  114.19   16.50
  -8  -2  -3  102.49   16.70
  -8  -2  -3   59.99   15.70
   8   2   3   73.79   16.70
  -9  -2  -3   36.30   16.70
  -9  -2  -3   40.90   15.90
  -9  -2  -3  -26.00   17.70
  -9  -2  -3   25.80   15.80
   9   2   3   13.30   17.00
 -10  -2  -3   90.19   19.00
 -10  -2  -3   99.69   20.70
 -10  -2  -3   57.69   16.70
 -10  -2  -3   60.99   18.40
  10   2   3  110.29   21.60
 -11  -2  -3  893.11   37.20
 -11  -2  -3  811.12   37.60
 -11  -2  -3  807.92   38.00
 -11  -2  -3  831.62   39.40
 -12  -2  -3  140.79   22.70
 -12  -2  -3  174.38   24.00
 -12  -2  -3  136.89   23.30
 -13  -2  -3   34.00   22.90
 -13  -2  -3   25.20   22.70
 -14  -2  -3   32.60   23.60
 -14  -2  -3    1.70   24.60
 -15  -2  -3   19.70   24.20
 -15  -2  -3   47.40   25.70
 -16  -2  -3   -4.50   25.60
 -16  -2  -3    7.30   25.50
 -17  -2  -3   83.59   29.60
 -17  -2  -3   42.70   27.30
 -18  -2  -3   16.10   26.70
 -18  -2  -3  -35.30   28.80
  18  -3  -3   57.99   38.70
 -18   3   3   92.69   36.30
  17  -3  -3   33.80   35.10
 -17   3   3   10.00   33.80
  16  -3  -3   42.00   33.40
 -16   3   3  -18.30   30.50
  15  -3  -3   58.69   33.30
 -15   3   3   39.00   30.00
  14  -3  -3   31.10   30.40
 -14   3   3   48.70   27.80
  13  -3  -3   95.49   29.80
 -13   3   3   94.39   27.50
  12  -3  -3   78.89   27.80
 -12   3   3   49.60   24.80
  11  -3  -3  136.29   28.10
 -11   3   3  181.88   25.50
  10  -3  -3   36.80   24.90
 -10   3   3   35.50   20.90
 -10   3   3   24.60   18.70
   9  -3  -3  502.05   36.50
  -9   3   3  431.16   29.20
  -9   3   3  414.96   33.10
   8  -3  -3   48.10   21.80
   8  -3  -3   78.39   32.30
  -8   3   3   97.39   17.30
  -8   3   3   70.19   19.60
   7  -3  -3   13.50   20.60
   7  -3  -3  -15.00   17.90
   7  -3  -3  -10.10   19.10
  -7   3   3  -12.20   17.00
   6  -3  -3   96.09   21.00
   6  -3  -3   89.29   18.90
   6  -3  -3   88.79   19.30
  -6   3   3   88.89   18.10
   5  -3  -3  286.27   22.30
   5  -3  -3  320.57   23.70
   5  -3  -3  315.07   21.50
  -5   3   3  289.07   21.30
   4  -3  -3    7.00   17.10
   4  -3  -3   10.50   15.00
   4  -3  -3  -38.90   17.70
  -4   3   3   -3.80   15.60
   3  -3  -3  137.29   18.90
   3  -3  -3  147.19   17.60
   3  -3  -3  170.78   19.10
  -3   3   3  120.79   17.40
   2  -3  -3   43.10   16.80
   2  -3  -3    5.40   16.40
   2  -3  -3    6.20   17.20
  -2   3   3    0.60   15.40
   1  -3  -3  -14.60   15.70
   1  -3  -3  -17.90   15.90
   1  -3  -3   15.00   16.40
  -1   3   3   -5.10   14.30
   0  -3  -3   75.29   16.60
   0  -3  -3   72.19   16.80
   0  -3  -3   88.99   16.20
   0   3   3  104.59   19.60
  -1  -3  -3  466.45   25.80
  -1  -3  -3  400.96   25.80
  -1  -3  -3  429.56   25.70
  -2  -3  -3  152.48   16.40
  -2  -3  -3  130.79   18.90
  -2  -3  -3  124.19   17.50
  -2  -3  -3  151.18   18.10
  -3  -3  -3   36.30   14.80
  -3  -3  -3   19.40   15.60
  -3  -3  -3   21.00   17.30
  -3  -3  -3   18.90   15.70
  -4  -3  -3   67.09   17.80
  -4  -3  -3   34.10   14.50
  -4  -3  -3   53.79   15.90
  -4  -3  -3   74.49   16.00
  -5  -3  -3  203.38   19.00
  -5  -3  -3  158.78   19.40
  -5  -3  -3  164.88   17.30
  -5  -3  -3  177.18   16.30
  -6  -3  -3  377.26   27.60
  -6  -3  -3  382.66   24.90
  -6  -3  -3  353.76   24.10
  -6  -3  -3  358.56   25.80
  -7  -3  -3  986.00   36.00
  -7  -3  -3 1121.99   38.90
  -7  -3  -3 1017.30   35.30
  -7  -3  -3 1013.90   36.50
  -8  -3  -3  106.69   20.70
  -8  -3  -3  135.49   19.80
  -8  -3  -3  132.69   17.30
  -8  -3  -3  158.18   18.60
  -9  -3  -3  462.55   31.10
  -9  -3  -3  463.85   33.40
  -9  -3  -3  458.55   29.70
  -9  -3  -3  412.26   29.20
 -10  -3  -3  117.09   19.60
 -10  -3  -3  129.89   20.70
 -10  -3  -3  112.29   22.80
 -10  -3  -3   87.59   20.70
 -11  -3  -3  -35.10   20.40
 -11  -3  -3   38.30   19.80
 -11  -3  -3  -12.80   21.40
 -12  -3  -3  146.89   24.40
 -12  -3  -3  112.89   22.80
 -12  -3  -3  118.69   23.80
 -13  -3  -3   44.60   23.30
 -13  -3  -3   -5.40   22.20
 -14  -3  -3   64.99   24.30
 -14  -3  -3   55.29   23.80
 -15  -3  -3   50.39   26.30
 -15  -3  -3   41.60   24.20
 -16  -3  -3    6.90   24.60
 -16  -3  -3    4.20   27.40
  16  -4  -3   22.60   38.50
  15  -4  -3  286.87   41.60
  14  -4  -3   50.09   35.10
  13  -4  -3  -56.99   31.10
  12  -4  -3   45.80   31.90
 -12   4   3  -43.20   33.70
  11  -4  -3  192.78   33.30
 -11   4   3  224.98   30.10
  10  -4  -3  -32.40   25.20
  10  -4  -3   -7.00   28.80
 -10   4   3    8.40   24.20
   9  -4  -3   52.89   28.80
   9  -4  -3   18.80   24.80
  -9   4   3  -10.00   22.60
   8  -4  -3   16.10   22.30
   8  -4  -3    5.40   26.20
  -8   4   3   12.50   21.40
   7  -4  -3  483.25   38.60
   7  -4  -3  497.05   32.70
   7  -4  -3  414.46   29.20
  -7   4   3  395.96   28.10
   6  -4  -3   50.79   18.40
   6  -4  -3   36.20   23.50
   6  -4  -3   74.69   21.30
  -6   4   3   40.90   20.20
   5  -4  -3  127.79   23.60
   5  -4  -3  103.59   21.70
   5  -4  -3   73.29   19.60
  -5   4   3  112.19   20.40
   4  -4  -3  136.79   21.40
   4  -4  -3  121.69   20.00
   4  -4  -3  149.29   22.60
  -4   4   3  136.19   19.50
   3  -4  -3   72.09   18.20
   3  -4  -3  102.39   20.70
   3  -4  -3  122.89   21.00
  -3   4   3  133.09   18.90
   2  -4  -3  431.26   27.10
   2  -4  -3  406.46   29.80
   2  -4  -3  427.96   30.00
  -2   4   3  425.86   26.60
   1  -4  -3  288.37   20.70
   1  -4  -3  282.67   22.80
   1  -4  -3  296.17   22.30
   0  -4  -3  194.48   19.20
   0  -4  -3  201.98   19.60
   0  -4  -3  165.78   20.50
  -1  -4  -3   -1.40   16.40
  -1  -4  -3   -9.30   16.50
  -1  -4  -3    4.30   18.10
  -2  -4  -3  368.36   25.80
  -2  -4  -3  415.26   29.30
  -2  -4  -3  378.56   26.10
  -3  -4  -3   -0.70   20.40
  -3  -4  -3  -16.40   16.50
  -3  -4  -3   -1.60   17.60
  -3  -4  -3    5.60   16.40
  -4  -4  -3    6.00   19.30
  -4  -4  -3   -3.50   20.60
  -4  -4  -3   22.10   17.20
  -4  -4  -3   25.60   16.00
  -5  -4  -3   -1.80   19.20
  -5  -4  -3   11.20   18.00
  -5  -4  -3   -4.60   20.90
  -5  -4  -3   13.50   16.10
  -6  -4  -3  244.78   24.70
  -6  -4  -3  178.38   20.60
  -6  -4  -3  218.98   18.90
  -6  -4  -3  218.18   22.40
  -7  -4  -3   25.90   18.70
  -7  -4  -3   19.60   22.00
  -7  -4  -3   47.50   21.30
  -7  -4  -3   69.39   17.30
  -8  -4  -3  565.24   29.40
  -8  -4  -3  584.14   34.50
  -8  -4  -3  522.65   30.70
  -8  -4  -3  551.84   35.70
  -9  -4  -3   28.40   18.60
  -9  -4  -3   12.50   23.00
  -9  -4  -3   11.40   21.40
  -9  -4  -3   12.00   22.60
 -10  -4  -3   37.80   20.90
 -10  -4  -3   18.20   22.90
 -10  -4  -3   50.29   18.90
 -11  -4  -3  124.39   25.20
 -11  -4  -3  138.99   21.70
 -11  -4  -3  127.09   23.60
 -12  -4  -3   35.40   23.80
 -12  -4  -3   22.20   21.80
 -12  -4  -3   60.29   23.50
 -13  -4  -3   43.90   24.90
 -13  -4  -3  100.79   23.00
 -14  -4  -3   25.40   24.40
 -14  -4  -3   25.50   22.50
 -15  -4  -3   12.30   25.70
 -15  -4  -3    4.40   23.10
  14  -5  -3   41.90   33.60
  14  -5  -3  -92.49   37.00
  13  -5  -3   92.39   38.80
  13  -5  -3   13.00   32.10
  12  -5  -3   48.70   30.20
  12  -5  -3   25.60   35.80
  11  -5  -3   16.50   33.40
  11  -5  -3   91.09   29.50
  10  -5  -3   26.30   33.20
  10  -5  -3   33.20   26.50
   9  -5  -3  308.67   37.00
   9  -5  -3  274.07   27.40
   8  -5  -3   18.50   29.90
   7  -5  -3   64.49   28.60
   6  -5  -3  423.36   32.80
   5  -5  -3  136.59   27.20
   4  -5  -3   35.00   24.10
   4  -5  -3   40.20   24.90
   3  -5  -3    1.60   24.50
   3  -5  -3   -0.70   22.70
   2  -5  -3  199.98   24.50
   2  -5  -3  212.28   26.90
   1  -5  -3  136.79   22.10
   1  -5  -3  154.08   26.20
   1  -5  -3   93.59   22.20
   0  -5  -3  105.29   25.20
   0  -5  -3  110.19   21.80
   0  -5  -3   94.99   20.20
  -1  -5  -3   33.30   19.00
  -1  -5  -3   21.10   18.30
  -1  -5  -3   11.40   24.30
  -2  -5  -3  107.59   19.90
  -2  -5  -3   97.99   25.00
  -2  -5  -3   73.59   19.00
  -3  -5  -3  110.29   19.60
  -3  -5  -3   98.89   26.40
  -3  -5  -3   87.29   25.10
  -3  -5  -3   77.99   19.10
  -4  -5  -3   45.40   18.50
  -4  -5  -3   62.99   25.40
  -4  -5  -3   70.69   18.50
  -4  -5  -3   55.09   25.90
  -5  -5  -3  217.58   26.50
  -5  -5  -3  131.49   20.10
  -5  -5  -3  161.68   19.30
  -5  -5  -3  170.28   26.30
  -6  -5  -3  -13.70   25.70
  -6  -5  -3  -25.10   24.00
  -6  -5  -3   -7.50   17.20
  -6  -5  -3   33.20   18.50
  -7  -5  -3   38.40   26.80
  -7  -5  -3   44.00   19.50
  -7  -5  -3   73.59   25.80
  -7  -5  -3   23.90   17.90
  -8  -5  -3  101.99   18.40
  -8  -5  -3  166.28   28.80
  -8  -5  -3  156.68   27.40
  -8  -5  -3  145.09   21.00
  -9  -5  -3  103.39   28.40
  -9  -5  -3   49.00   27.20
  -9  -5  -3   70.49   18.90
  -9  -5  -3   42.80   25.30
 -10  -5  -3   31.10   18.90
 -10  -5  -3   28.00   24.60
 -10  -5  -3   18.80   27.60
 -11  -5  -3   11.10   19.80
 -11  -5  -3  -16.40   29.00
 -11  -5  -3    6.20   24.80
 -12  -5  -3   -0.90   25.80
 -12  -5  -3   13.10   20.10
  10  -6  -3  131.89   37.00
   9  -6  -3   47.80   32.10
   8  -6  -3   61.69   31.70
   7  -6  -3  -17.40   29.50
   6  -6  -3    6.00   28.40
   5  -6  -3   26.90   27.20
   4  -6  -3   -4.90   26.20
   3  -6  -3   74.59   25.10
   2  -6  -3   32.20   23.10
   1  -6  -3   97.19   24.10
   0  -6  -3   33.70   21.10
   0  -6  -3   84.39   30.70
  -1  -6  -3   13.60   20.40
  -1  -6  -3  -21.80   29.10
  -2  -6  -3   14.10   20.40
  -2  -6  -3   39.70   29.90
  -3  -6  -3   95.39   20.70
  -3  -6  -3  113.09   31.90
  -3  -6  -3  114.29   30.00
  -4  -6  -3   95.99   28.80
  -4  -6  -3   70.49   31.00
  -4  -6  -3   51.89   19.10
  -5  -6  -3  -16.40   30.00
  -5  -6  -3   13.30   27.20
  -6  -6  -3   49.90   27.20
  -6  -6  -3   38.30   30.70
  -7  -6  -3   32.30   28.10
  -7  -6  -3   14.00   31.40
  -8  -6  -3   64.79   31.20
  -8  -6  -3   49.50   27.90
  -3  -6   4   23.10   22.80
  -2  -6   4  -18.70   23.30
  -1  -6   4   23.40   24.00
   0  -6   4   50.39   26.70
   1  -6   4    8.20   28.00
   2  -6   4  -24.40   20.00
   2  -6   4  -24.20   28.30
   3  -6   4    6.00   21.50
   4  -6   4   94.69   25.70
   5  -6   4   48.80   27.00
   6  -6   4  153.68   29.40
   7  -6   4  -20.90   28.40
   8  -6   4    5.10   30.60
 -14  -5   4   35.70   19.70
 -14  -5   4    6.00   15.80
 -13  -5   4  145.69   19.90
  -3  -5   4   66.99   16.90
  -2  -5   4   15.10   18.30
  -1  -5   4   26.40   19.20
   0  -5   4    1.60   19.70
   1  -5   4   35.20   15.20
   1  -5   4   41.60   21.80
   1  -5   4   22.10   17.30
   2  -5   4   59.49   23.50
   2  -5   4   67.69   16.50
   2  -5   4   46.60   20.90
   3  -5   4    0.30   23.80
   3  -5   4   21.50   22.20
   4  -5   4   69.29   24.10
   4  -5   4  116.69   25.50
   5  -5   4  197.58   27.60
   5  -5   4  178.38   33.80
   6  -5   4    2.90   26.40
   7  -5   4    0.60   28.60
   8  -5   4  -20.40   28.60
   9  -5   4   11.00   29.80
  10  -5   4   48.40   32.40
  11  -5   4   15.10   32.40
  12  -5   4  129.29   36.50
 -16  -4   4   26.40   22.60
 -16  -4   4   -2.90   18.10
 -15  -4   4  -16.30   16.50
 -15  -4   4   20.50   20.90
 -14  -4   4   12.30   15.90
 -14  -4   4  -18.50   19.50
 -13  -4   4   77.59   19.20
 -13  -4   4   56.59   15.40
 -12  -4   4  -19.50   16.40
 -12  -4   4    4.20   13.40
 -11  -4   4   57.69   12.80
  -2  -4   4   22.20   12.70
  -1  -4   4    3.50   14.00
   0  -4   4   23.70   15.20
   0  -4   4   54.99   14.60
   0  -4   4   40.90   11.80
   1  -4   4   -8.50   12.40
   1  -4   4   26.30   16.50
   1  -4   4    6.20   15.80
   2  -4   4   55.89   18.10
   2  -4   4   87.69   18.70
   2  -4   4   51.29   14.20
   3  -4   4  411.26   29.00
   3  -4   4  333.37   24.00
   3  -4   4  309.57   23.90
   4  -4   4   32.70   20.10
   4  -4   4   31.40   15.80
   4  -4   4   79.99   20.10
   5  -4   4   34.60   21.90
   5  -4   4   18.90   20.30
   5  -4   4   -8.90   16.20
   6  -4   4  232.58   26.70
   6  -4   4  211.28   25.40
   7  -4   4  363.36   30.70
   8  -4   4  274.17   30.90
   9  -4   4  -27.00   28.30
  10  -4   4  688.93   48.90
  11  -4   4   28.60   32.00
  12  -4   4   86.19   34.60
  13  -4   4   50.59   35.30
  14  -4   4   65.59   38.20
 -18  -3   4   14.00   18.70
 -18  -3   4    6.40   21.10
 -17  -3   4    2.70   19.80
 -17  -3   4  -31.60   17.10
 -16  -3   4   31.60   16.60
 -16  -3   4   -3.00   18.60
 -15  -3   4   22.40   15.90
 -15  -3   4   30.30   17.30
 -15  -3   4   28.80   16.50
 -14  -3   4   14.00   15.50
 -14  -3   4   -5.50   15.70
 -14  -3   4    9.60   14.50
 -13  -3   4   67.89   15.70
 -12  -3   4   34.40   14.00
 -11  -3   4   24.00   12.80
 -10  -3   4    2.70   11.20
  -1  -3   4    8.90   11.10
   0  -3   4  824.62   27.10
   0  -3   4  774.22   25.00
   0  -3   4  765.12   27.10
   1  -3   4  135.79   13.30
   1  -3   4  123.29   15.10
   1  -3   4  156.88   15.70
   2  -3   4  579.84   23.70
   2  -3   4  564.94   27.10
   2  -3   4  580.44   26.10
  -3   3  -4  234.88   18.80
   3  -3   4  261.27   19.90
   3  -3   4  219.38   16.50
   3  -3   4  251.47   19.10
  -4   3  -4  534.65   27.60
   4  -3   4  534.15   30.80
   4  -3   4  489.85   24.90
   4  -3   4  503.65   26.80
  -5   3  -4   24.80   16.50
   5  -3   4   -3.70   14.20
   5  -3   4   46.70   19.20
   5  -3   4   24.10   17.60
  -6   3  -4   30.80   17.70
   6  -3   4  -14.20   18.10
   6  -3   4   14.60   20.10
  -7   3  -4    7.90   18.60
   7  -3   4  -30.10   21.00
   7  -3   4   32.30   19.50
  -8   3  -4  112.69   21.70
   8  -3   4  120.79   25.00
   8  -3   4   63.19   21.70
  -9   3  -4    1.00   22.10
   9  -3   4  -13.50   24.60
 -10   3  -4   96.39   24.70
  10  -3   4   98.19   28.50
 -11   3  -4   15.00   25.60
  11  -3   4  -11.10   28.10
 -12   3  -4   26.20   27.50
  12  -3   4   22.80   30.40
 -13   3  -4  -17.90   28.40
  13  -3   4   14.30   31.10
 -14   3  -4  164.08   37.80
  14  -3   4  171.58   37.10
  15  -3   4   52.89   36.50
  16  -3   4    3.30   38.00
 -19  -2   4   20.60   23.00
 -19  -2   4   30.90   21.60
 -18  -2   4   29.60   21.80
 -18  -2   4   13.00   20.30
 -17  -2   4   16.10   20.00
 -17  -2   4   52.49   20.90
 -16  -2   4   31.20   20.10
 -16  -2   4   73.49   19.60
 -15  -2   4   32.50   18.50
 -14  -2   4   27.70   16.30
 -14  -2   4   29.20   14.60
 -14  -2   4   24.20   16.90
 -13  -2   4   35.60   16.10
 -13  -2   4   42.00   15.60
 -13  -2   4   63.79   13.80
 -12  -2   4   45.70   12.70
 -12  -2   4   67.09   15.00
 -12  -2   4   66.49   14.70
 -11  -2   4  452.55   22.50
 -11  -2   4  462.25   21.10
 -11  -2   4  433.06   23.40
 -10  -2   4   70.79   10.80
 -10  -2   4   43.70   11.80
 -10  -2   4   64.89   12.50
  -9  -2   4   22.80   10.50
  -9  -2   4   38.60   11.30
  -9  -2   4   26.50    9.30
  -8  -2   4  101.99   11.20
  -7  -2   4  402.46   16.80
  -1  -2   4   42.70    9.50
  -1  -2   4   34.40    8.80
  -1  -2   4   42.20    8.40
  -1  -2   4   23.20    9.10
   0  -2   4  310.77   16.60
   0  -2   4  312.17   17.20
   1  -2   4  440.56   19.60
   1  -2   4  419.06   21.00
  -2   2  -4  129.39   14.40
   2  -2   4  127.89   16.00
   2  -2   4  153.98   14.00
  -3   2  -4  342.27   22.50
   3  -2   4  300.97   21.30
   3  -2   4  337.27   23.50
   3  -2   4  371.66   21.40
  -4   2  -4  506.95   26.80
   4  -2   4  483.65   30.30
   4  -2   4  574.34   28.40
  -5   2  -4  189.88   18.40
   5  -2   4  196.28   20.50
   5  -2   4  177.88   21.20
  -6   2  -4   65.99   16.80
   6  -2   4   88.79   18.40
  -7   2  -4   23.10   17.40
  -7   2  -4   25.00   17.20
   7  -2   4   12.80   17.10
  -8   2  -4   60.29   18.70
  -8   2  -4   55.39   18.00
  -9   2  -4   57.59   20.20
  -9   2  -4   54.99   19.60
 -10   2  -4   11.40   21.40
 -10   2  -4    1.30   19.50
 -11   2  -4   15.10   23.00
  11  -2   4   23.90   26.60
 -12   2  -4  204.78   28.10
  12  -2   4  227.38   31.10
 -13   2  -4  201.38   30.60
  13  -2   4  218.18   33.40
 -14   2  -4   13.70   28.60
  14  -2   4  -33.40   29.80
 -15   2  -4   16.30   30.10
  15  -2   4  -10.20   31.10
 -16   2  -4  -37.10   31.20
  16  -2   4   25.30   35.10
 -17   2  -4   -2.20   34.30
  17  -2   4  -14.80   35.30
 -20  -1   4   -8.10   24.00
 -20  -1   4   22.90   26.60
 -19  -1   4  -12.80   23.40
 -19  -1   4   21.90   24.30
 -18  -1   4  103.09   24.90
 -18  -1   4   45.50   22.70
 -17  -1   4   68.19   21.80
 -17  -1   4   85.09   22.90
 -16  -1   4  246.38   24.60
 -16  -1   4  191.48   23.10
 -15  -1   4  129.39   20.10
 -15  -1   4  133.49   21.30
 -14  -1   4   -1.60   22.30
 -14  -1   4  -32.90   16.60
 -14  -1   4  -19.00   17.50
  13   1  -4  -28.30   18.70
 -13  -1   4   11.20   15.70
 -13  -1   4   -7.70   16.30
 -13  -1   4    5.90   14.60
  12   1  -4  -18.90   16.70
 -12  -1   4   22.10   13.40
 -12  -1   4   11.50   14.50
 -12  -1   4    8.50   15.30
 -11  -1   4   76.29   14.30
 -11  -1   4   51.09   14.90
 -11  -1   4   35.80   12.20
 -10  -1   4   28.50   12.10
 -10  -1   4    9.00   13.20
 -10  -1   4    8.00   13.60
  -9  -1   4    0.40   13.00
  -9  -1   4  -11.40   11.10
  -9  -1   4   19.50   12.60
  -8  -1   4   31.70   13.10
  -8  -1   4   58.19   11.80
  -8  -1   4   26.00   12.30
  -7  -1   4 1170.78   33.40
  -7  -1   4 1213.08   33.50
  -7  -1   4 1193.78   33.50
  -6  -1   4  204.98   15.60
  -6  -1   4  207.08   15.80
  -6  -1   4  179.68   12.30
  -5  -1   4  901.61   26.10
  -5  -1   4  935.31   25.80
  -4  -1   4 2320.17   55.09
  -4  -1   4 2369.96   55.09
  -4  -1   4 2379.06   55.49
   3   1  -4  -11.60   12.30
  -3  -1   4   -8.10    7.60
  -3  -1   4    4.10    8.00
  -3  -1   4   12.10    8.10
  -2  -1   4  510.05   17.10
  -2  -1   4  532.55   17.60
  -2  -1   4  526.35   17.50
  -2  -1   4  511.15   17.20
  -1  -1   4 1162.58   30.60
  -1  -1   4 1143.89   30.30
  -1  -1   4 1147.29   30.40
  -1  -1   4 1198.18   30.70
   0   1  -4 3082.59   72.49
   0  -1   4 3123.79   72.59
   0  -1   4 3071.49   72.49
   0  -1   4 3077.69   72.69
   0  -1   4 3112.89   72.39
  -1   1  -4  296.97   17.50
   1  -1   4  294.57   19.10
   1  -1   4  305.47   19.10
   1  -1   4  319.87   18.60
   1  -1   4  288.97   16.90
  -2   1  -4  409.56   20.30
   2  -1   4  367.26   21.80
   2  -1   4  394.16   19.60
   2  -1   4  368.96   21.60
  -3   1  -4  202.38   15.20
  -3   1  -4  183.38   16.20
   3  -1   4  196.58   16.40
   3  -1   4  182.88   16.00
  -4   1  -4  538.05   24.60
  -4   1  -4  527.65   26.10
   4  -1   4  530.75   26.30
   4  -1   4  574.34   27.40
  -5   1  -4  134.99   18.40
  -5   1  -4  114.39   16.50
   5  -1   4  176.98   19.90
  -6   1  -4    5.10   17.70
  -6   1  -4   32.80   16.00
   6  -1   4   30.50   19.10
  -7   1  -4  263.37   20.70
  -7   1  -4  271.27   22.20
   7  -1   4  292.17   23.10
  -8   1  -4   93.09   18.30
  -8   1  -4   67.39   19.00
   8  -1   4  127.39   22.00
  -9   1  -4  464.45   32.40
  -9   1  -4  486.65   31.90
   9  -1   4  491.45   35.00
 -10   1  -4   23.00   20.00
 -10   1  -4    7.00   19.90
  10  -1   4   37.40   23.50
 -11   1  -4  -14.00   21.30
 -11   1  -4   31.20   21.50
  11  -1   4   10.50   24.70
 -12   1  -4    0.70   22.40
 -12   1  -4   22.90   23.00
  12  -1   4    8.50   27.90
 -13   1  -4  870.71   46.00
 -13   1  -4  839.42   45.60
  13  -1   4  884.81   48.40
 -14   1  -4   92.99   28.70
 -15   1  -4   53.89   28.70
 -16   1  -4   20.30   30.50
  16  -1   4   -1.30   32.10
 -17   1  -4   26.60   32.60
 -18   1  -4   52.99   34.20
 -20   0   4   48.00   27.60
 -20   0   4   57.29   28.40
 -19   0   4   -3.90   26.20
 -19   0   4  -36.90   25.00
 -18   0   4  129.39   26.30
 -18   0   4  130.59   26.70
 -17   0   4   -7.90   23.40
 -17   0   4   27.00   23.00
 -16   0   4   51.69   23.50
 -16   0   4   82.19   22.50
 -15   0   4   15.20   21.60
 -15   0   4  -12.70   19.60
  14   0  -4   28.90   20.80
 -14   0   4   24.80   20.60
 -14   0   4   11.70   18.40
  13   0  -4  -19.00   19.00
 -13   0   4  -11.70   18.20
 -13   0   4    5.20   17.00
 -12   0   4 1752.62   52.49
 -12   0   4 1770.52   51.29
  11   0  -4  -13.90   15.70
 -11   0   4   21.40   15.30
 -11   0   4   19.20   16.50
  10   0  -4  246.18   19.80
 -10   0   4  279.37   20.60
 -10   0   4  297.97   19.70
   9   0  -4   -4.40   15.10
  -9   0   4   -3.50   17.80
  -9   0   4   19.90   15.20
  -9   0   4    8.70   16.00
   8   0  -4 1200.68   38.20
  -8   0   4 1270.47   38.40
  -8   0   4 1251.97   38.00
   7   0  -4   11.10   13.20
  -7   0   4    4.00   11.50
  -7   0   4   11.20   13.20
  -7   0   4    4.40   13.10
   6   0  -4   82.79   13.30
  -6   0   4   88.69   13.90
  -6   0   4   91.99   12.40
  -6   0   4   95.49   13.40
   5   0  -4    8.10   11.60
  -5   0   4   -2.30   12.00
  -5   0   4   -6.80   11.60
  -5   0   4   -1.80   10.80
   4   0  -4   35.30   14.70
   4   0  -4    4.80   11.60
  -4   0   4   31.50   12.10
  -4   0   4   19.80   12.00
  -4   0   4   36.30   11.20
   3   0  -4   12.80   14.00
   3   0  -4   -6.60   10.70
  -3   0   4   12.00   11.40
  -3   0   4   15.40   10.90
  -3   0   4  -11.80   11.10
   2   0  -4 2881.51   69.59
   2   0  -4 2975.50   68.09
   2   0  -4 2828.62   68.09
  -2   0   4 2881.81   68.29
  -2   0   4 2834.32   68.29
  -2   0   4 2853.91   68.09
  -2   0   4 2844.92   68.19
   1   0  -4   -8.90   10.50
   1   0  -4    2.20   11.40
  -1   0   4  -19.40   10.70
  -1   0   4   -8.20   10.20
  -1   0   4   -6.90   11.30
  -1   0   4   14.80   11.10
   0   0  -4 2324.87   56.99
   0   0  -4 2387.66   57.59
   0   0   4 2380.86   57.39
   0   0   4 2410.86   57.69
   0   0   4 2314.37   57.59
  -1   0  -4   42.00   13.40
  -1   0  -4   -9.80   10.60
   1   0   4   23.40   11.70
   1   0   4  -13.90   12.20
   1   0   4   -7.10   12.00
  -2   0  -4  213.68   14.10
  -2   0  -4  217.88   16.20
   2   0   4  189.98   14.90
   2   0   4  222.68   15.20
  -3   0  -4  -21.20   14.30
  -3   0  -4   23.40   12.80
   3   0   4   28.70   13.70
   3   0   4   -8.20   13.90
  -4   0  -4   22.20   13.40
  -4   0  -4   11.90   15.10
   4   0   4  -15.70   13.80
  -5   0  -4    2.80   14.40
  -5   0  -4  -23.80   16.60
   5   0   4   -3.90   15.60
  -6   0  -4  483.45   27.00
  -6   0  -4  418.86   28.20
   6   0   4  416.76   29.40
  -7   0  -4   14.80   16.00
  -7   0  -4   11.30   18.20
   7   0   4   11.00   18.90
  -8   0  -4  245.78   20.20
  -8   0  -4  236.68   21.70
   8   0   4  259.77   22.90
  -9   0  -4   13.70   17.40
  -9   0  -4    3.50   18.50
   9   0   4   -4.10   20.20
 -10   0  -4    2.60   19.10
 -10   0  -4   -3.00   18.80
  10   0   4    7.40   21.90
 -11   0  -4  -14.90   20.70
 -11   0  -4  -20.40   20.50
  11   0   4   39.90   23.40
 -12   0  -4  -29.20   22.70
 -12   0  -4   11.90   22.10
  12   0   4   -5.50   25.70
 -13   0  -4   40.70   24.30
 -13   0  -4    6.20   23.60
  13   0   4    3.30   28.30
 -14   0  -4   28.60   25.80
 -14   0  -4   43.10   25.40
  14   0   4   32.30   29.00
 -15   0  -4    7.10   26.50
 -15   0  -4   13.90   25.50
 -16   0  -4   22.20   26.60
 -16   0  -4  -36.20   28.10
 -17   0  -4    1.70   30.10
 -18   0  -4  775.12   54.09
 -20   1   4   47.20   31.40
 -19   1   4   19.20   28.40
 -18   1   4   67.89   29.10
 -18   1   4  112.09   26.90
 -17   1   4   84.19   27.50
 -17   1   4   53.39   24.70
  16  -1  -4  243.78   30.70
 -16   1   4  169.98   26.40
 -16   1   4  200.78   27.90
  15  -1  -4   98.79   26.20
 -15   1   4   52.69   23.90
 -15   1   4  163.78   25.10
  14  -1  -4  -21.00   22.30
 -14   1   4   21.10   20.70
 -14   1   4   24.70   20.90
  13  -1  -4   28.90   21.10
 -13   1   4   -3.80   19.40
 -13   1   4    4.10   19.60
  12  -1  -4    5.50   18.90
 -12   1   4   19.70   18.30
 -12   1   4   12.00   18.40
  11  -1  -4   53.19   18.50
 -11   1   4   56.59   17.90
 -11   1   4   38.60   18.30
  10  -1  -4   11.10   17.50
 -10   1   4   17.20   16.40
 -10   1   4   12.20   16.40
   9  -1  -4   11.50   17.20
  -9   1   4    9.40   15.90
  -9   1   4  -19.70   15.40
   8  -1  -4  -20.60   16.20
  -8   1   4   14.60   16.30
  -8   1   4   21.10   15.70
   7  -1  -4 1229.28   39.50
  -7   1   4 1136.59   38.20
  -7   1   4 1228.98   38.90
   6  -1  -4  245.38   18.50
  -6   1   4  251.87   18.30
  -6   1   4  232.38   17.90
   5  -1  -4  938.61   32.50
   5  -1  -4  946.21   34.40
  -5   1   4  952.80   31.60
  -5   1   4  901.71   31.00
   4  -1  -4 2449.35   61.09
   4  -1  -4 2445.26   61.89
  -4   1   4 2347.27   60.19
  -4   1   4 2331.37   60.39
   3  -1  -4   21.10   14.40
   3  -1  -4    6.50   12.90
  -3   1   4    0.50   12.50
  -3   1   4    8.80   13.60
   2  -1  -4  564.14   24.30
   2  -1  -4  589.74   26.40
  -2   1   4  598.14   25.00
  -2   1   4  545.75   23.80
   1  -1  -4 1109.29   34.00
   1  -1  -4 1163.38   34.20
  -1   1   4 1209.68   34.50
  -1   1   4 1172.98   34.50
   0  -1  -4 3369.16   79.59
   0  -1  -4 3260.77   79.09
   0  -1  -4 3325.97   79.09
   0   1   4 3239.18   78.49
   0   1   4 3305.27   79.29
  -1  -1  -4  329.27   22.50
  -1  -1  -4  375.56   21.10
  -1  -1  -4  311.77   20.40
   1   1   4  342.07   20.30
   1   1   4  363.86   22.10
  -2  -1  -4  406.66   21.60
  -2  -1  -4  361.56   21.70
  -2  -1  -4  350.06   23.20
   2   1   4  423.86   22.40
   2   1   4  398.06   21.50
  -3  -1  -4  189.28   17.80
  -3  -1  -4  211.28   15.30
  -3  -1  -4  182.88   15.30
   3   1   4  172.48   15.60
  -4  -1  -4  538.55   25.20
  -4  -1  -4  603.04   26.30
  -4  -1  -4  596.64   27.00
   4   1   4  564.84   26.90
  -5  -1  -4  127.59   16.10
  -5  -1  -4   88.59   18.60
  -5  -1  -4  112.79   15.70
   5   1   4  109.69   17.80
  -6  -1  -4   20.70   14.90
  -6  -1  -4    8.60   15.80
  -6  -1  -4   25.90   18.60
   6   1   4   -2.00   17.00
  -7  -1  -4  289.57   19.80
  -7  -1  -4  263.87   21.70
  -7  -1  -4  256.77   20.00
   7   1   4  274.57   20.60
  -8  -1  -4  120.89   19.60
  -8  -1  -4  115.99   18.00
  -8  -1  -4   90.19   17.10
   8   1   4   84.69   18.10
  -9  -1  -4  473.65   31.40
  -9  -1  -4  428.26   28.70
  -9  -1  -4  455.15   29.10
   9   1   4  458.45   30.10
 -10  -1  -4   25.90   18.20
 -10  -1  -4   30.60   18.70
 -10  -1  -4   15.40   19.60
  10   1   4   26.10   21.10
 -11  -1  -4    6.20   18.90
 -11  -1  -4  -27.30   19.90
 -11  -1  -4   10.10   20.80
  11   1   4    5.90   22.10
 -12  -1  -4   18.60   23.10
 -12  -1  -4   26.70   22.60
  12   1   4   21.40   24.70
 -13  -1  -4  895.61   44.20
 -13  -1  -4  837.52   44.80
 -14  -1  -4   84.29   26.10
 -14  -1  -4   79.19   25.90
 -15  -1  -4   25.60   26.50
 -15  -1  -4   95.49   27.60
 -16  -1  -4   20.50   27.50
 -16  -1  -4   -7.30   27.50
 -17  -1  -4   -0.30   27.40
 -17  -1  -4   67.89   29.40
 -18  -1  -4   89.49   30.90
 -18  -1  -4  133.39   31.40
 -19   2   4   -4.60   32.10
 -18   2   4   81.19   31.70
  17  -2  -4    8.00   31.60
 -17   2   4   -7.90   28.60
  16  -2  -4   99.99   31.70
 -16   2   4   50.19   28.30
  15  -2  -4  -17.40   26.80
 -15   2   4   -0.70   24.10
 -15   2   4   35.20   26.80
  14  -2  -4   52.89   26.60
 -14   2   4   15.00   21.50
 -14   2   4   42.60   25.10
  13  -2  -4   37.80   24.90
 -13   2   4   40.60   22.80
 -13   2   4   37.70   20.20
  12  -2  -4   32.10   22.90
 -12   2   4   69.29   19.70
 -12   2   4   81.49   21.80
  11  -2  -4  447.96   34.60
 -11   2   4  469.05   32.60
 -11   2   4  454.45   31.10
  10  -2  -4   49.60   20.20
 -10   2   4   86.69   19.30
 -10   2   4   64.69   17.90
   9  -2  -4   50.69   19.50
  -9   2   4   55.69   17.10
  -9   2   4   51.89   17.70
   8  -2  -4   84.99   19.60
  -8   2   4   85.59   18.50
  -8   2   4   90.79   17.40
   7  -2  -4  398.56   29.50
  -7   2   4  453.35   28.80
  -7   2   4  380.46   25.80
   6  -2  -4 2860.31   75.19
   6  -2  -4 2934.01   74.89
  -6   2   4 2799.92   72.99
  -6   2   4 2797.42   73.49
   5  -2  -4 1249.57   41.30
   5  -2  -4 1212.38   41.70
   5  -2  -4 1197.58   40.70
  -5   2   4 1196.68   40.60
  -5   2   4 1214.88   39.30
   4  -2  -4 1367.16   42.40
   4  -2  -4 1400.76   42.10
   4  -2  -4 1287.97   42.10
  -4   2   4 1301.77   40.30
  -4   2   4 1400.36   42.00
   3  -2  -4  402.66   24.80
   3  -2  -4  415.56   26.30
  -3   2   4  412.06   25.60
  -3   2   4  413.06   24.30
   2  -2  -4  678.03   29.20
   2  -2  -4  711.13   29.10
  -2   2   4  739.83   28.70
   1  -2  -4   59.39   15.00
   1  -2  -4   26.70   16.10
   1  -2  -4   51.59   15.00
  -1   2   4    7.60   14.80
   0  -2  -4  283.67   23.00
   0  -2  -4  333.67   24.50
   0  -2  -4  330.37   21.80
   0   2   4  310.37   22.20
  -1  -2  -4  421.36   25.30
  -1  -2  -4  461.25   25.80
  -1  -2  -4  446.66   25.00
  -1  -2  -4  461.25   26.70
   1   2   4  468.15   24.00
  -2  -2  -4  126.69   18.40
  -2  -2  -4  153.38   16.20
  -2  -2  -4  148.79   15.90
  -2  -2  -4  136.89   18.10
   2   2   4  136.69   16.60
  -3  -2  -4  324.87   23.80
  -3  -2  -4  335.07   21.30
  -3  -2  -4  341.37   24.50
  -3  -2  -4  316.47   24.40
   3   2   4  353.26   24.70
  -4  -2  -4  507.55   27.20
  -4  -2  -4  530.25   28.90
  -4  -2  -4  547.25   26.60
  -4  -2  -4  574.24   26.90
   4   2   4  528.05   27.20
  -5  -2  -4  182.18   20.40
  -5  -2  -4  219.88   18.60
  -5  -2  -4  197.28   17.40
  -5  -2  -4  198.18   17.90
   5   2   4  188.48   18.60
  -6  -2  -4   84.39   16.90
  -6  -2  -4   87.59   19.10
  -6  -2  -4   88.89   16.30
  -6  -2  -4   85.19   16.10
   6   2   4  111.29   17.50
  -7  -2  -4   67.39   16.60
  -7  -2  -4   61.09   18.90
  -7  -2  -4   62.39   16.30
  -7  -2  -4   56.79   16.20
   7   2   4   45.00   17.50
  -8  -2  -4   33.90   16.70
  -8  -2  -4   15.50   16.40
  -8  -2  -4   22.20   19.00
  -8  -2  -4   45.10   16.60
   8   2   4   46.10   17.90
  -9  -2  -4   28.70   17.50
  -9  -2  -4   30.60   17.10
  -9  -2  -4   58.99   18.40
  -9  -2  -4   61.69   20.60
   9   2   4   48.50   18.40
 -10  -2  -4   17.90   19.10
 -10  -2  -4   -8.20   18.10
 -10  -2  -4    8.30   17.30
 -10  -2  -4   -5.90   20.20
  10   2   4  -36.50   18.60
 -11  -2  -4   31.40   20.20
 -11  -2  -4   -2.30   20.30
 -11  -2  -4   50.09   22.70
 -12  -2  -4  203.58   26.00
 -12  -2  -4  193.98   25.20
 -13  -2  -4  181.98   26.90
 -13  -2  -4  149.59   26.00
 -14  -2  -4   31.70   25.50
 -14  -2  -4   24.70   25.90
 -15  -2  -4  -31.80   25.90
 -15  -2  -4  -11.50   25.50
 -16  -2  -4   34.20   27.40
 -16  -2  -4    4.60   27.00
 -17  -2  -4   18.10   28.90
 -17  -2  -4  -23.30   26.60
  18  -3  -4   -2.70   36.70
 -18   3   4   50.19   34.80
  17  -3  -4    3.20   35.40
 -17   3   4   35.10   33.50
  16  -3  -4    5.50   35.00
 -16   3   4   33.80   31.90
  15  -3  -4   66.39   33.30
 -15   3   4   -3.30   29.50
  14  -3  -4   29.40   30.70
 -14   3   4   -5.80   27.10
  13  -3  -4   81.99   31.00
 -13   3   4   49.00   26.00
  12  -3  -4   13.30   27.30
 -12   3   4  -41.20   23.00
  11  -3  -4   16.30   25.20
 -11   3   4   30.20   22.80
  10  -3  -4    1.60   23.30
 -10   3   4   45.30   21.00
 -10   3   4   15.50   18.00
   9  -3  -4  407.76   29.60
  -9   3   4  394.46   27.10
  -9   3   4  393.86   27.80
   8  -3  -4    9.00   20.80
   8  -3  -4   -2.40   21.50
  -8   3   4    2.80   18.40
  -8   3   4  -14.60   16.30
   7  -3  -4  214.68   24.90
   7  -3  -4  207.18   21.90
   7  -3  -4  253.87   23.40
  -7   3   4  218.88   21.50
   6  -3  -4   -3.60   18.30
   6  -3  -4   20.80   18.40
   6  -3  -4   20.10   20.10
  -6   3   4   10.60   17.50
   5  -3  -4  101.99   19.30
   5  -3  -4  134.19   21.30
   5  -3  -4  108.39   18.10
  -5   3   4   82.59   18.60
   4  -3  -4   53.39   18.40
   4  -3  -4   34.30   17.90
  -4   3   4   24.30   16.70
   3  -3  -4  170.18   19.70
   3  -3  -4  133.59   19.30
   3  -3  -4  163.48   19.20
  -3   3   4  121.49   18.20
   2  -3  -4   40.30   17.70
   2  -3  -4   22.70   16.80
   2  -3  -4   -3.30   16.90
  -2   3   4   38.20   15.70
   1  -3  -4    7.50   16.90
   1  -3  -4  -22.10   16.70
   1  -3  -4   -8.90   16.50
  -1   3   4    5.40   15.30
   0  -3  -4  831.32   33.00
   0  -3  -4  843.02   32.80
   0  -3  -4  817.42   33.50
   0   3   4  911.41   32.60
  -1  -3  -4  142.69   18.40
  -1  -3  -4  126.49   17.40
  -1  -3  -4  122.19   17.10
   1   3   4  121.09   16.70
  -2  -3  -4  553.54   30.30
  -2  -3  -4  649.14   28.80
  -2  -3  -4  637.14   29.70
  -2  -3  -4  600.64   28.70
  -3  -3  -4  240.18   21.60
  -3  -3  -4  247.58   19.50
  -3  -3  -4  219.28   18.50
  -3  -3  -4  222.38   19.10
  -4  -3  -4  543.35   28.30
  -4  -3  -4  589.14   27.50
  -4  -3  -4  582.74   28.20
  -4  -3  -4  531.95   30.50
  -5  -3  -4   21.90   19.00
  -5  -3  -4   22.10   17.40
  -5  -3  -4   39.30   15.70
  -5  -3  -4   43.10   16.80
  -6  -3  -4   50.89   20.10
  -6  -3  -4   39.30   17.30
  -6  -3  -4   25.80   16.00
  -6  -3  -4   25.70   17.70
  -7  -3  -4   -5.30   18.30
  -7  -3  -4   52.39   16.50
  -7  -3  -4   50.09   17.40
  -7  -3  -4   16.00   20.00
  -8  -3  -4   94.89   20.30
  -8  -3  -4   96.89   18.50
  -8  -3  -4   69.19   21.70
  -8  -3  -4   78.99   18.80
  -9  -3  -4   32.90   22.10
  -9  -3  -4    4.50   18.90
  -9  -3  -4  -19.80   17.20
  -9  -3  -4  -26.70   20.70
 -10  -3  -4   92.19   24.20
 -10  -3  -4   86.59   20.90
 -10  -3  -4  107.69   21.30
 -11  -3  -4    2.90   21.30
 -11  -3  -4    7.40   23.00
 -11  -3  -4   13.80   21.50
 -12  -3  -4   24.20   21.80
 -12  -3  -4   32.80   24.40
 -13  -3  -4   26.30   23.40
 -13  -3  -4  -20.80   24.00
 -14  -3  -4  148.79   28.60
 -14  -3  -4  127.59   26.80
 -15  -3  -4   41.60   26.00
 -15  -3  -4   50.29   27.90
 -16  -3  -4  -27.80   25.60
 -16  -3  -4  -43.30   27.70
  16  -4  -4    2.90   38.30
  15  -4  -4   34.70   36.80
  14  -4  -4   -7.80   34.50
  13  -4  -4  141.49   32.40
  13  -4  -4   85.99   35.20
 -13   4   4   41.90   40.30
  12  -4  -4   11.40   33.10
  12  -4  -4    4.80   29.00
 -12   4   4  -28.80   26.50
  11  -4  -4   63.19   31.90
  11  -4  -4   36.70   27.60
 -11   4   4   64.59   26.50
  10  -4  -4   46.00   30.00
  10  -4  -4   58.19   27.10
 -10   4   4   26.00   24.80
   9  -4  -4   -6.20   27.40
   9  -4  -4    8.80   24.00
  -9   4   4   40.80   23.70
   8  -4  -4   89.29   28.00
   8  -4  -4   23.10   22.80
  -8   4   4   38.00   23.00
   7  -4  -4   39.80   20.90
   7  -4  -4   27.00   23.00
   7  -4  -4   89.79   26.10
  -7   4   4   36.50   21.40
   6  -4  -4  -28.10   19.00
   6  -4  -4   11.10   23.30
   6  -4  -4  -11.00   21.10
  -6   4   4  -18.50   19.70
   5  -4  -4  131.79   22.20
   5  -4  -4  178.98   24.60
  -5   4   4  163.98   21.70
   4  -4  -4  458.35   34.10
   4  -4  -4  462.35   30.30
   4  -4  -4  418.96   31.40
  -4   4   4  431.66   29.70
   3  -4  -4   75.39   18.50
   3  -4  -4   64.09   21.10
   3  -4  -4   83.59   20.90
  -3   4   4   57.09   18.40
   2  -4  -4   39.80   19.50
   2  -4  -4    6.40   19.60
   2  -4  -4   -5.20   17.70
  -2   4   4   16.60   16.80
   1  -4  -4   22.20   18.10
   1  -4  -4   -7.50   18.90
   1  -4  -4    2.70   18.30
  -1   4   4  -21.20   16.90
   0  -4  -4   65.89   19.20
   0  -4  -4   46.70   17.60
   0  -4  -4   35.80   19.30
  -1  -4  -4   -2.50   17.80
  -1  -4  -4   -5.00   17.20
  -1  -4  -4  -49.90   18.20
  -2  -4  -4   88.69   20.50
  -2  -4  -4   74.49   22.30
  -2  -4  -4   33.80   18.40
  -2  -4  -4   60.79   17.80
  -3  -4  -4  359.16   27.80
  -3  -4  -4  369.66   27.50
  -3  -4  -4  363.26   28.80
  -3  -4  -4  356.76   27.00
  -4  -4  -4   71.09   19.80
  -4  -4  -4   54.49   17.60
  -4  -4  -4   44.00   20.90
  -4  -4  -4   66.29   22.50
  -5  -4  -4   13.50   19.20
  -5  -4  -4   -9.80   22.20
  -5  -4  -4   -0.80   17.00
  -5  -4  -4   -7.60   20.60
  -6  -4  -4  241.28   22.50
  -6  -4  -4  277.77   24.70
  -6  -4  -4  305.37   26.80
  -6  -4  -4  223.88   20.80
  -7  -4  -4  421.46   27.90
  -7  -4  -4  323.47   22.70
  -7  -4  -4  409.46   31.10
  -7  -4  -4  384.76   29.10
  -8  -4  -4  283.57   27.00
  -8  -4  -4  245.38   24.90
  -8  -4  -4  261.67   26.60
  -8  -4  -4  295.47   22.80
  -9  -4  -4   -7.40   18.50
  -9  -4  -4   -8.60   23.40
  -9  -4  -4   21.90   24.50
 -10  -4  -4  501.35   34.60
 -10  -4  -4  564.14   40.70
 -10  -4  -4  593.74   36.50
 -11  -4  -4   29.20   21.90
 -11  -4  -4   24.10   22.70
 -11  -4  -4   73.79   25.70
 -12  -4  -4   69.39   25.90
 -12  -4  -4   19.30   22.60
 -13  -4  -4   27.20   23.40
 -13  -4  -4    2.90   26.30
 -14  -4  -4   80.69   25.60
 -14  -4  -4   19.20   27.40
  14  -5  -4   47.80   33.10
  14  -5  -4   74.69   40.60
  13  -5  -4   92.69   31.80
  13  -5  -4  154.98   39.40
  12  -5  -4   -9.60   35.40
  12  -5  -4   -4.50   30.10
  11  -5  -4    0.20   35.10
  11  -5  -4   12.00   28.40
  10  -5  -4  136.19   27.30
  10  -5  -4  201.28   36.80
   9  -5  -4   46.20   24.70
   9  -5  -4   64.99   32.50
   8  -5  -4   -4.50   29.00
   7  -5  -4   14.60   27.10
   6  -5  -4    4.10   26.80
   5  -5  -4  281.57   29.50
   4  -5  -4  178.28   34.60
   4  -5  -4  101.19   25.60
   3  -5  -4   62.79   23.90
   3  -5  -4   71.49   25.70
   2  -5  -4   46.30   23.30
   2  -5  -4    8.00   24.90
   1  -5  -4   60.59   22.30
   1  -5  -4   45.60   24.70
   0  -5  -4  -18.80   25.20
   0  -5  -4   15.70   20.80
  -1  -5  -4   23.50   21.40
  -1  -5  -4   20.60   25.10
  -1  -5  -4   32.40   20.30
  -2  -5  -4   70.69   20.60
  -2  -5  -4   88.99   27.50
  -2  -5  -4   89.49   25.60
  -2  -5  -4   37.50   20.30
  -3  -5  -4    2.70   19.60
  -3  -5  -4   27.30   25.00
  -3  -5  -4    5.90   19.30
  -3  -5  -4   23.90   27.10
  -4  -5  -4   60.89   20.80
  -4  -5  -4   98.39   26.90
  -4  -5  -4  126.39   20.30
  -4  -5  -4   80.79   26.70
  -5  -5  -4  151.48   22.60
  -5  -5  -4  230.78   29.00
  -5  -5  -4  185.78   21.20
  -5  -5  -4  264.87   28.00
  -6  -5  -4   -3.00   25.10
  -6  -5  -4   18.90   27.40
  -6  -5  -4   13.70   28.60
  -6  -5  -4    0.20   18.70
  -7  -5  -4   37.80   27.70
  -7  -5  -4   34.40   26.50
  -7  -5  -4   13.80   18.50
  -8  -5  -4   23.60   28.20
  -8  -5  -4   39.60   27.70
  -8  -5  -4    4.20   19.20
  -9  -5  -4    9.40   26.40
  -9  -5  -4   35.00   28.40
  -9  -5  -4    6.40   19.70
 -10  -5  -4   25.40   20.60
 -10  -5  -4   -1.30   26.10
 -10  -5  -4   84.69   39.40
 -11  -5  -4   22.90   27.10
 -11  -5  -4   25.70   21.40
 -12  -5  -4  128.49   23.90
 -12  -5  -4  138.99   29.60
  10  -6  -4   49.00   33.90
   9  -6  -4   10.50   32.80
   8  -6  -4   49.50   33.10
   7  -6  -4   72.59   30.90
   6  -6  -4   78.69   29.90
   5  -6  -4   19.90   27.40
   4  -6  -4   28.20   26.30
   3  -6  -4   40.50   25.20
   2  -6  -4   80.59   24.70
   1  -6  -4   36.20   23.40
   0  -6  -4   39.50   21.80
  -1  -6  -4   65.89   21.80
  -2  -6  -4    7.30   31.50
  -2  -6  -4    5.90   21.60
  -2  -6  -4   -9.60   30.50
  -3  -6  -4  -14.90   20.90
  -3  -6  -4   -9.70   30.70
  -3  -6  -4   30.10   30.70
  -4  -6  -4   83.89   21.00
  -4  -6  -4   87.99   30.30
  -4  -6  -4  151.78   32.70
  -5  -6  -4   -3.30   28.80
  -5  -6  -4    3.90   31.30
  -5  -6  -4   22.10   19.30
  -6  -6  -4  109.09   34.40
  -6  -6  -4  164.78   30.40
  -6  -6  -4   65.79   19.10
  -7  -6  -4   53.19   28.80
  -8  -6  -4   45.20   29.20
  -3  -6   5   43.00   21.10
  -2  -6   5  138.09   24.40
  -1  -6   5    5.60   23.90
   0  -6   5   33.10   26.30
   1  -6   5  -33.50   26.40
   2  -6   5   21.70   28.60
   2  -6   5   75.39   20.80
   3  -6   5  -11.80   22.20
   4  -6   5  105.59   25.90
   5  -6   5  -10.80   25.90
   6  -6   5   -1.40   27.70
   7  -6   5   -4.20   29.00
  -3  -5   5   31.90   16.10
  -2  -5   5   36.90   17.50
  -1  -5   5    9.10   19.50
   0  -5   5   35.40   20.90
   1  -5   5  144.89   16.40
   1  -5   5  156.08   19.70
   1  -5   5  152.08   23.60
   2  -5   5   31.00   23.10
   2  -5   5   12.60   15.70
   2  -5   5   46.00   20.50
   3  -5   5   18.00   22.00
   3  -5   5   49.80   24.20
   4  -5   5   33.20   24.90
   4  -5   5   23.30   22.90
   5  -5   5   48.20   26.30
   6  -5   5   -9.10   26.20
   7  -5   5   -3.70   26.60
   8  -5   5  106.19   30.50
   9  -5   5  -44.50   29.70
  10  -5   5   63.59   32.80
  11  -5   5   63.39   34.70
 -16  -4   5   49.40   23.30
 -16  -4   5   37.10   17.60
 -15  -4   5   23.90   16.20
 -15  -4   5    6.50   21.10
 -14  -4   5  225.38   22.20
 -14  -4   5  151.08   17.10
 -13  -4   5  107.19   14.90
 -12  -4   5   22.10   16.10
 -12  -4   5   21.30   12.60
  -2  -4   5   88.99   13.40
  -1  -4   5   94.79   15.60
   0  -4   5   52.59   12.20
   0  -4   5   63.19   14.90
   0  -4   5   60.79   16.20
   1  -4   5   32.40   16.30
   1  -4   5   14.50   16.80
   1  -4   5   26.10   12.60
   2  -4   5   14.70   17.70
   2  -4   5   21.90   14.50
   2  -4   5   21.70   17.10
   3  -4   5  206.98   18.30
   3  -4   5  196.68   21.60
   3  -4   5  235.98   21.90
   4  -4   5   45.90   21.20
   4  -4   5   80.59   21.50
   4  -4   5   47.70   16.20
   5  -4   5  -10.60   21.70
   5  -4   5   -8.80   22.40
   6  -4   5    7.90   22.80
   6  -4   5  -21.90   23.50
   7  -4   5  101.99   27.10
   8  -4   5  127.49   28.10
   9  -4   5   31.70   28.50
  10  -4   5   -3.80   29.30
  11  -4   5  -32.80   31.00
  12  -4   5   27.70   33.70
  13  -4   5  -50.19   34.60
  14  -4   5   16.60   37.40
 -18  -3   5   26.00   20.20
 -18  -3   5   43.80   18.30
 -17  -3   5   27.80   18.90
 -17  -3   5    5.10   16.60
 -16  -3   5    2.90   19.60
 -16  -3   5   11.50   17.80
 -16  -3   5    9.80   15.70
 -15  -3   5   22.20   16.90
 -14  -3   5   25.30   15.70
 -13  -3   5   63.09   15.10
 -12  -3   5   71.99   14.10
 -11  -3   5    1.90   11.70
 -10  -3   5   50.39   11.10
  -1  -3   5  956.40   28.30
   0  -3   5  151.58   12.30
   0  -3   5  116.29   14.00
   0  -3   5  149.59   14.40
   1  -3   5   27.70   14.10
   1  -3   5   25.90   11.60
   1  -3   5   15.40   13.80
   2  -3   5    7.20   15.10
   2  -3   5   17.80   15.50
   2  -3   5   -9.40   12.10
  -3   3  -5   18.90   15.50
   3  -3   5   -7.40   16.60
   3  -3   5   17.80   16.20
   3  -3   5  -11.80   13.10
  -4   3  -5   71.29   17.20
   4  -3   5   87.59   18.90
   4  -3   5   62.89   17.60
   4  -3   5   58.49   14.80
  -5   3  -5  715.43   32.90
   5  -3   5  790.22   35.10
   5  -3   5  618.44   29.80
   5  -3   5  716.73   32.30
  -6   3  -5  493.55   31.60
   6  -3   5  492.35   31.20
   6  -3   5  526.95   34.30
  -7   3  -5    3.10   19.40
   7  -3   5   91.89   22.90
   7  -3   5   39.40   20.30
  -8   3  -5  -20.00   20.40
   8  -3   5   -3.70   23.40
  -9   3  -5   14.60   22.70
   9  -3   5   50.49   25.90
 -10   3  -5  144.59   27.20
  10  -3   5  136.49   29.80
 -11   3  -5   -8.00   25.40
  11  -3   5    7.30   29.00
 -12   3  -5   79.39   28.90
  12  -3   5  124.09   33.30
  13  -3   5   43.80   32.90
  14  -3   5   13.30   34.60
  15  -3   5  -13.60   35.20
  16  -3   5   77.39   37.80
 -19  -2   5  131.59   24.70
 -19  -2   5  148.99   23.20
 -18  -2   5   17.20   19.80
 -18  -2   5   13.90   21.40
 -17  -2   5   22.10   19.20
 -17  -2   5   24.40   20.10
 -16  -2   5    9.60   17.80
 -16  -2   5   10.00   18.70
 -15  -2   5  162.78   18.80
 -15  -2   5  123.09   19.60
 -14  -2   5   33.30   15.60
 -14  -2   5   23.30   14.10
 -14  -2   5   17.70   16.20
 -13  -2   5   26.60   12.80
 -13  -2   5   20.60   14.60
 -13  -2   5   16.70   15.10
 -12  -2   5   10.60   12.90
 -12  -2   5   12.90   11.80
 -12  -2   5   -1.70   14.00
 -11  -2   5  202.98   15.80
 -11  -2   5  192.38   14.50
 -11  -2   5  166.48   13.30
 -10  -2   5   71.29   10.50
 -10  -2   5   75.39   11.70
 -10  -2   5   54.79   12.30
  -9  -2   5   50.79   11.10
  -8  -2   5  314.27   16.30
   5   2  -5   -9.10   14.10
  -2  -2   5  269.37   14.80
  -2  -2   5  312.47   14.40
  -1  -2   5  714.83   23.50
  -1  -2   5  725.73   23.60
  -1  -2   5  770.82   22.80
  -1  -2   5  721.13   23.40
   0  -2   5 2236.78   55.09
   0  -2   5 2217.78   55.49
   0  -2   5 2253.67   55.89
   0  -2   5 2296.87   55.69
   1  -2   5  265.87   19.60
   1  -2   5  296.47   17.40
   1  -2   5  284.27   21.10
  -2   2  -5  984.40   31.40
   2  -2   5  945.21   30.80
   2  -2   5  966.20   33.40
   2  -2   5  976.60   32.40
  -3   2  -5  257.07   17.90
   3  -2   5  235.28   16.70
   3  -2   5  249.28   18.90
   3  -2   5  326.57   20.70
  -4   2  -5   49.80   15.60
   4  -2   5   59.69   18.20
   4  -2   5   21.80   16.40
  -5   2  -5  374.56   26.30
   5  -2   5  414.46   29.10
   5  -2   5  412.76   27.00
  -6   2  -5  359.36   26.70
   6  -2   5  390.26   26.60
   6  -2   5  381.16   30.30
  -7   2  -5   19.70   17.50
  -7   2  -5   22.50   22.60
   7  -2   5   19.80   21.00
   7  -2   5   16.20   17.90
  -8   2  -5  -21.60   19.20
  -8   2  -5  -13.00   18.10
   8  -2   5   -4.10   22.30
  -9   2  -5  253.07   24.40
  -9   2  -5  280.47   24.60
   9  -2   5  294.87   28.80
 -10   2  -5  295.77   26.90
 -11   2  -5  273.67   29.00
 -12   2  -5   41.30   26.70
 -13   2  -5   -4.70   26.80
  13  -2   5   55.49   30.70
 -14   2  -5  209.28   33.00
  14  -2   5  219.38   34.50
 -15   2  -5   17.90   30.80
  15  -2   5   21.90   33.80
 -16   2  -5  344.37   38.20
  16  -2   5  210.18   39.10
 -17   2  -5   48.70   35.60
  17  -2   5   40.00   38.20
 -20  -1   5   24.00   23.90
 -20  -1   5   42.50   26.30
 -19  -1   5   53.09   23.30
 -19  -1   5   31.40   25.00
 -18  -1   5  -10.80   21.20
 -18  -1   5   22.00   24.10
 -17  -1   5   30.20   22.20
 -17  -1   5   11.10   20.10
 -16  -1   5    9.60   19.60
 -16  -1   5   17.30   20.90
 -15  -1   5   25.20   19.50
 -15  -1   5   27.30   18.70
 -14  -1   5   31.80   17.00
 -14  -1   5   34.70   15.70
 -14  -1   5   10.80   18.20
 -13  -1   5  208.68   20.20
 -13  -1   5  169.38   16.30
 -13  -1   5  215.88   19.20
 -12  -1   5    1.80   14.70
 -12  -1   5    9.40   12.70
 -12  -1   5   -8.40   14.80
 -11  -1   5   36.00   12.50
 -11  -1   5   41.20   14.00
 -11  -1   5   58.79   15.00
 -10  -1   5  525.75   23.00
 -10  -1   5  557.24   25.20
 -10  -1   5  555.64   24.70
  -9  -1   5  207.98   14.90
  -9  -1   5  177.88   14.90
  -9  -1   5  152.88   15.70
  -8  -1   5  104.69   13.60
  -8  -1   5  139.99   14.60
  -8  -1   5  145.99   13.40
  -7  -1   5  383.86   20.10
  -7  -1   5  376.16   19.50
  -6  -1   5  736.83   23.90
  -6  -1   5  730.23   24.50
  -6  -1   5  753.62   23.20
   5   1  -5  416.16   24.40
  -5  -1   5  423.66   17.30
  -5  -1   5  400.66   17.30
  -5  -1   5  418.96   18.30
   4   1  -5  139.99   15.70
  -4  -1   5  138.29   11.00
  -4  -1   5  150.68   11.60
  -4  -1   5  151.48   11.50
  -4  -1   5  162.08   10.70
   3   1  -5  389.06   20.90
  -3  -1   5  361.26   17.10
  -3  -1   5  375.46   17.00
  -3  -1   5  380.46   16.80
  -3  -1   5  358.36   16.50
  -2  -1   5  671.13   22.00
  -2  -1   5  630.74   21.50
  -2  -1   5  683.43   21.50
  -2  -1   5  640.24   21.40
  -1  -1   5  547.55   20.30
  -1  -1   5  538.45   20.10
  -1  -1   5  510.65   20.80
  -1  -1   5  546.95   20.80
   0   1  -5  439.66   19.80
   0  -1   5  493.25   20.90
   0  -1   5  506.65   21.10
   0  -1   5  508.75   20.10
   0  -1   5  490.45   21.10
  -1   1  -5   64.39   12.10
   1  -1   5   56.29   12.70
   1  -1   5   77.39   13.60
   1  -1   5   84.79   13.20
   1  -1   5   56.59   11.30
  -2   1  -5   77.89   13.30
   2  -1   5   61.49   14.10
   2  -1   5   63.79   14.10
   2  -1   5   51.39   14.10
  -3   1  -5   93.39   14.50
  -3   1  -5   81.49   16.20
   3  -1   5  104.19   15.60
   3  -1   5   92.79   16.70
  -4   1  -5  109.79   18.00
  -4   1  -5  107.29   16.30
   4  -1   5  114.79   17.70
   4  -1   5   98.79   16.60
  -5   1  -5  360.56   28.30
  -5   1  -5  335.07   25.00
   5  -1   5  368.56   23.10
  -6   1  -5  418.46   27.50
  -6   1  -5  387.96   27.80
   6  -1   5  444.16   30.40
  -7   1  -5   15.70   16.20
  -7   1  -5   26.20   18.30
   7  -1   5   21.30   20.30
  -8   1  -5  111.39   19.60
  -8   1  -5  124.59   20.20
   8  -1   5  111.29   22.10
  -9   1  -5   16.70   19.30
  -9   1  -5   -2.70   18.80
   9  -1   5   32.10   22.50
 -10   1  -5  347.37   26.80
 -10   1  -5  359.36   27.40
  10  -1   5  384.66   29.80
 -11   1  -5   11.00   23.50
 -11   1  -5   16.50   22.60
  11  -1   5   32.60   27.50
 -12   1  -5   76.49   25.90
 -12   1  -5   80.79   25.00
  12  -1   5   71.99   28.20
 -13   1  -5  -29.60   25.60
  13  -1   5    8.60   30.20
 -14   1  -5   65.89   28.20
  14  -1   5    6.60   31.00
 -15   1  -5  124.19   31.60
 -16   1  -5   73.19   32.70
 -17   1  -5  -29.00   32.40
 -20   0   5   11.70   26.10
 -20   0   5    9.80   26.20
 -19   0   5  186.28   28.10
 -19   0   5  200.78   28.80
 -18   0   5  -21.60   22.40
 -18   0   5  -13.70   23.50
 -17   0   5  237.58   27.30
 -17   0   5  206.68   26.40
 -16   0   5  -38.60   20.50
 -16   0   5    0.80   21.30
 -15   0   5  220.28   23.70
 -15   0   5  174.38   23.80
  14   0  -5   17.20   19.70
 -14   0   5   27.50   19.20
 -14   0   5   18.00   19.10
 -13   0   5 1723.13   51.99
 -13   0   5 1694.53   52.19
  12   0  -5   23.60   16.70
 -12   0   5    2.50   16.30
 -12   0   5   -2.00   16.00
  11   0  -5   79.49   17.10
 -11   0   5  119.19   17.00
 -11   0   5   87.09   17.00
  10   0  -5   33.30   15.50
 -10   0   5   19.10   15.20
 -10   0   5   22.60   15.20
   9   0  -5  470.05   26.10
  -9   0   5  496.45   23.70
  -9   0   5  481.15   25.40
  -9   0   5  482.85   26.10
   8   0  -5  -15.10   14.30
  -8   0   5   -7.60   14.00
  -8   0   5   -3.20   14.70
  -8   0   5    1.10   12.40
   7   0  -5  162.58   16.30
  -7   0   5  191.28   15.20
  -7   0   5  199.18   16.20
  -7   0   5  190.28   16.40
   6   0  -5    1.00   12.70
  -6   0   5    5.30   11.60
  -6   0   5  -14.50   12.50
  -6   0   5    8.40   12.80
   5   0  -5  387.96   25.40
   5   0  -5  375.26   20.80
  -5   0   5  383.26   21.10
  -5   0   5  392.16   20.40
  -5   0   5  398.06   20.60
   4   0  -5   -1.60   11.60
   4   0  -5  -18.20   14.90
  -4   0   5  -11.70   11.90
  -4   0   5   -4.30   12.40
  -4   0   5    6.20   12.00
   3   0  -5 1443.36   38.40
   3   0  -5 1386.06   40.60
  -3   0   5 1446.06   38.40
  -3   0   5 1413.86   38.80
  -3   0   5 1414.46   38.40
   2   0  -5  -18.70   12.90
   2   0  -5   -9.30   11.30
  -2   0   5   17.70   12.90
  -2   0   5    2.90   11.60
  -2   0   5   -0.50   12.40
  -2   0   5  -14.00   12.80
   1   0  -5   -1.90   13.40
   1   0  -5    8.90   11.70
  -1   0   5   13.90   12.90
  -1   0   5  -12.70   12.20
  -1   0   5  -14.30   12.20
   0   0  -5    7.40   13.60
   0   0  -5   16.40   11.70
   0   0   5    4.90   12.40
   0   0   5    8.70   13.10
   0   0   5  -18.70   12.30
  -1   0  -5  483.55   22.70
  -1   0  -5  452.55   22.80
   1   0   5  470.95   22.70
   1   0   5  455.25   23.20
   1   0   5  495.25   23.00
  -2   0  -5    6.40   14.70
  -2   0  -5   -6.40   12.50
   2   0   5   -4.00   12.90
   2   0   5    1.70   13.80
  -3   0  -5   -4.50   15.50
  -3   0  -5    7.00   13.70
   3   0   5   -8.90   14.90
   3   0   5    3.10   14.40
  -4   0  -5    4.70   14.50
  -4   0  -5   15.00   16.00
   4   0   5   11.60   16.00
   4   0   5  -20.90   15.60
  -5   0  -5 1559.54   47.50
  -5   0  -5 1570.64   46.50
   5   0   5 1632.34   47.80
  -6   0  -5   50.19   16.90
  -6   0  -5    7.80   18.30
   6   0   5   27.10   18.30
  -7   0  -5  313.87   21.80
  -7   0  -5  300.97   22.80
   7   0   5  371.46   29.60
  -8   0  -5   13.30   17.20
  -8   0  -5   16.50   18.90
   8   0   5    3.50   19.50
  -9   0  -5  120.79   21.00
  -9   0  -5  139.19   19.90
   9   0   5  168.88   23.00
 -10   0  -5    1.60   20.50
 -10   0  -5   25.00   20.00
  10   0   5  -18.60   22.60
 -11   0  -5  303.47   27.20
 -11   0  -5  338.57   27.20
  11   0   5  388.86   30.70
 -12   0  -5  -10.80   22.50
 -12   0  -5   13.90   24.20
  12   0   5   14.20   25.80
 -13   0  -5   15.90   25.90
 -13   0  -5    1.30   25.50
  13   0   5  -19.90   28.20
 -14   0  -5   18.00   25.90
 -14   0  -5  -10.90   26.70
  14   0   5    4.80   29.90
 -15   0  -5  728.23   46.20
 -15   0  -5  844.32   50.19
 -16   0  -5   25.10   29.60
 -17   0  -5  117.39   33.40
 -18   0  -5  -17.00   32.00
 -20   1   5    9.30   29.90
 -19   1   5   22.50   28.80
 -19   1   5   27.20   31.50
 -18   1   5   62.69   27.00
 -18   1   5   22.00   25.70
 -17   1   5  -25.30   23.30
 -17   1   5    7.80   24.80
  16  -1  -5  -47.60   32.40
 -16   1   5   53.99   23.40
 -16   1   5   24.10   23.80
  15  -1  -5   34.00   24.50
 -15   1   5   29.30   22.80
 -15   1   5    6.80   21.90
  14  -1  -5   19.80   22.70
 -14   1   5   60.79   21.40
 -14   1   5   26.00   21.20
  13  -1  -5  194.28   24.00
 -13   1   5  204.38   23.20
 -13   1   5  245.08   24.10
  12  -1  -5   15.50   19.20
 -12   1   5   -7.80   17.70
 -12   1   5   -3.40   17.70
  11  -1  -5   38.10   18.40
 -11   1   5   68.29   17.70
 -11   1   5   56.59   17.60
  10  -1  -5  577.94   31.40
 -10   1   5  565.34   29.40
 -10   1   5  559.04   29.40
   9  -1  -5  184.78   19.90
  -9   1   5  202.28   19.20
  -9   1   5  160.48   18.90
   8  -1  -5   90.29   18.40
  -8   1   5  123.89   17.50
  -8   1   5  113.29   17.40
   7  -1  -5  409.56   26.70
  -7   1   5  329.17   25.20
  -7   1   5  400.96   25.50
   6  -1  -5  796.32   31.90
   6  -1  -5  784.92   34.40
  -6   1   5  804.82   29.80
  -6   1   5  795.12   31.50
   5  -1  -5  439.86   25.30
   5  -1  -5  452.95   27.60
  -5   1   5  441.36   25.20
  -5   1   5  427.16   24.10
   4  -1  -5  135.69   15.60
   4  -1  -5  134.19   17.90
  -4   1   5  159.48   15.30
  -4   1   5  144.89   16.10
   3  -1  -5  363.56   25.10
   3  -1  -5  409.36   23.00
  -3   1   5  397.56   22.80
  -3   1   5  393.86   22.80
   2  -1  -5  665.83   26.80
  -2   1   5  698.93   26.80
  -2   1   5  658.73   27.60
   1  -1  -5  560.54   25.70
   1  -1  -5  574.54   24.70
  -1   1   5  551.54   24.80
  -1   1   5  568.34   25.20
   0  -1  -5  523.05   24.40
   0  -1  -5  498.05   24.20
   0  -1  -5  535.95   26.30
   0   1   5  471.35   25.20
   0   1   5  536.45   24.30
  -1  -1  -5   96.29   14.10
  -1  -1  -5   81.69   16.40
  -1  -1  -5   88.19   14.60
   1   1   5   74.79   15.30
   1   1   5   91.39   14.90
  -2  -1  -5   50.39   13.80
  -2  -1  -5   46.50   17.00
  -2  -1  -5   35.50   13.70
   2   1   5   50.39   14.40
   2   1   5   55.69   15.20
  -3  -1  -5   56.69   17.90
  -3  -1  -5   73.09   15.00
  -3  -1  -5   73.49   15.00
   3   1   5   84.09   15.80
   3   1   5  104.19   15.60
  -4  -1  -5  109.79   16.00
  -4  -1  -5   75.79   18.70
  -4  -1  -5   54.29   15.30
   4   1   5   82.89   17.40
   4   1   5  110.79   17.90
  -5  -1  -5  309.47   24.70
  -5  -1  -5  348.67   23.30
  -5  -1  -5  342.27   27.00
   5   1   5  356.96   27.60
  -6  -1  -5  452.65   26.90
  -6  -1  -5  488.45   28.50
  -6  -1  -5  470.45   31.20
   6   1   5  450.95   29.60
  -7  -1  -5    5.20   18.70
  -7  -1  -5   -3.80   15.50
  -7  -1  -5    9.80   16.80
   7   1   5    3.00   17.30
  -8  -1  -5   98.09   18.70
  -8  -1  -5  102.79   17.20
  -8  -1  -5  109.59   20.60
   8   1   5  119.19   19.60
  -9  -1  -5   12.60   17.00
  -9  -1  -5  -13.90   18.10
  -9  -1  -5   13.00   20.30
   9   1   5    5.80   18.80
 -10  -1  -5  392.86   31.20
 -10  -1  -5  337.57   26.50
 -10  -1  -5  304.17   23.80
  10   1   5  384.96   28.20
 -11  -1  -5   66.69   21.90
 -11  -1  -5   28.00   22.30
 -11  -1  -5   29.90   29.80
  11   1   5   44.70   23.80
 -12  -1  -5   66.99   24.30
 -12  -1  -5   35.00   24.50
  12   1   5   73.49   25.70
 -13  -1  -5  -25.30   24.30
 -13  -1  -5    4.40   25.20
 -14  -1  -5   68.99   25.90
 -14  -1  -5   54.19   27.90
 -15  -1  -5  117.09   27.90
 -15  -1  -5  120.49   29.40
 -16  -1  -5   71.09   28.90
 -16  -1  -5   45.30   30.30
 -17  -1  -5   20.60   28.90
 -17  -1  -5   43.50   29.90
 -19   2   5  143.49   34.60
 -18   2   5   13.20   31.10
  17  -2  -5    1.20   30.80
 -17   2   5  -32.10   28.70
  16  -2  -5  -31.10   28.70
 -16   2   5   13.80   27.10
  15  -2  -5  146.99   29.90
 -15   2   5  114.59   24.60
 -15   2   5  159.68   28.10
  14  -2  -5   27.70   26.00
 -14   2   5   32.50   24.00
 -14   2   5   20.70   21.30
  13  -2  -5   43.60   25.20
 -13   2   5   -5.00   20.20
 -13   2   5   37.00   22.40
  12  -2  -5   51.39   23.20
 -12   2   5    3.00   18.90
 -12   2   5   -9.20   20.50
  11  -2  -5  209.78   24.60
 -11   2   5  188.18   21.70
 -11   2   5  223.98   23.90
  10  -2  -5  114.29   22.00
 -10   2   5   85.69   18.50
 -10   2   5   73.79   19.10
   9  -2  -5   62.59   19.90
  -9   2   5   61.79   18.40
  -9   2   5   37.50   17.10
   8  -2  -5  340.27   24.40
   8  -2  -5  365.96   26.40
  -8   2   5  344.17   27.70
  -8   2   5  323.87   25.80
   7  -2  -5   13.10   18.40
   7  -2  -5   -5.40   19.50
  -7   2   5    2.30   15.80
  -7   2   5  -16.00   16.40
   6  -2  -5  201.68   21.80
   6  -2  -5  215.88   21.00
  -6   2   5  183.38   19.20
  -6   2   5  188.18   20.00
   5  -2  -5   -1.00   18.70
   5  -2  -5   -6.20   17.60
  -5   2   5   28.30   15.20
  -5   2   5    8.50   16.50
   4  -2  -5  311.17   26.70
   4  -2  -5  295.47   21.70
   4  -2  -5  262.07   20.60
  -4   2   5  316.47   20.10
  -4   2   5  290.97   21.40
   3  -2  -5  476.15   27.30
   3  -2  -5  506.75   28.60
  -3   2   5  541.15   27.00
  -3   2   5  528.75   28.20
   2  -2  -5  248.78   19.70
   2  -2  -5  253.67   19.40
  -2   2   5  276.47   19.50
  -2   2   5  284.57   28.90
   1  -2  -5  765.72   30.70
   1  -2  -5  771.92   30.90
  -1   2   5  712.23   30.90
   0  -2  -5 2233.48   59.59
   0  -2  -5 2277.27   60.79
   0  -2  -5 2381.36   60.79
   0   2   5 2228.98   59.49
  -1  -2  -5  264.07   21.30
  -1  -2  -5  285.67   21.40
  -1  -2  -5  290.67   20.00
  -1  -2  -5  277.37   20.10
   1   2   5  278.77   20.60
  -2  -2  -5  993.20   34.80
  -2  -2  -5  939.71   36.70
  -2  -2  -5  994.80   34.00
  -2  -2  -5  997.50   35.40
   2   2   5 1014.70   35.30
  -3  -2  -5  278.57   22.00
  -3  -2  -5  265.47   19.20
  -3  -2  -5  273.47   20.80
  -3  -2  -5  248.98   19.40
   3   2   5  266.37   19.80
  -4  -2  -5   46.40   16.20
  -4  -2  -5   81.99   16.50
  -4  -2  -5   26.30   17.60
  -4  -2  -5   59.89   19.50
   4   2   5   54.99   17.00
  -5  -2  -5  363.26   29.10
  -5  -2  -5  399.96   26.10
  -5  -2  -5  414.86   25.80
  -5  -2  -5  437.76   26.80
   5   2   5  435.26   27.70
  -6  -2  -5  401.06   29.40
  -6  -2  -5  338.87   25.40
  -6  -2  -5  408.16   26.50
  -6  -2  -5  411.76   27.30
   6   2   5  414.96   27.90
  -7  -2  -5   14.50   19.90
  -7  -2  -5   43.60   16.90
  -7  -2  -5    1.40   16.50
  -7  -2  -5    0.30   16.30
   7   2   5   18.00   18.50
  -8  -2  -5    0.40   16.90
  -8  -2  -5    3.00   17.80
  -8  -2  -5  -24.20   20.20
  -8  -2  -5   -3.80   17.30
   8   2   5   23.90   18.90
  -9  -2  -5  226.48   22.10
  -9  -2  -5  282.17   25.10
  -9  -2  -5  216.88   21.40
  -9  -2  -5  229.38   21.90
   9   2   5  208.68   22.70
 -10  -2  -5  331.77   25.90
 -10  -2  -5  305.87   26.70
 -10  -2  -5  292.57   24.50
  10   2   5  353.06   30.90
 -11  -2  -5  213.58   24.70
 -11  -2  -5  254.77   27.20
 -11  -2  -5  274.27   27.80
 -12  -2  -5   40.40   24.40
 -12  -2  -5   71.59   24.10
 -13  -2  -5   39.40   25.40
 -13  -2  -5    7.60   24.70
 -14  -2  -5  173.08   29.10
 -14  -2  -5  264.87   30.90
 -15  -2  -5   15.00   27.60
 -15  -2  -5   22.70   27.70
 -16  -2  -5  166.38   30.70
 -16  -2  -5  223.28   31.50
 -17  -2  -5   33.50   30.10
 -17  -2  -5   42.80   28.60
  18  -3  -5  -14.80   37.60
 -18   3   5   36.10   34.60
  17  -3  -5  -21.40   36.70
 -17   3   5   17.90   31.70
  16  -3  -5  -29.80   33.80
 -16   3   5  -11.80   30.30
  15  -3  -5   14.40   32.60
 -15   3   5  129.09   31.60
  14  -3  -5   16.00   30.40
 -14   3   5   23.20   27.50
  13  -3  -5  144.19   30.30
 -13   3   5   92.79   27.70
  12  -3  -5  124.89   28.90
 -12   3   5   90.99   25.40
  11  -3  -5  -35.50   24.70
 -11   3   5   -0.20   22.70
  10  -3  -5   52.69   25.70
  10  -3  -5   64.39   24.70
 -10   3   5   81.89   19.50
 -10   3   5   79.49   22.60
   9  -3  -5    6.30   23.70
   9  -3  -5    8.80   22.50
  -9   3   5    2.70   20.10
  -9   3   5   39.80   17.80
   8  -3  -5   74.59   22.50
   8  -3  -5   68.29   22.00
  -8   3   5  108.39   19.10
  -8   3   5   94.99   20.70
   7  -3  -5   14.20   23.40
   7  -3  -5  -12.80   19.80
   7  -3  -5  -19.30   20.60
  -7   3   5   -4.70   18.10
  -7   3   5    9.60   15.50
   6  -3  -5   41.10   20.60
   6  -3  -5   16.70   18.00
   6  -3  -5    3.20   18.10
  -6   3   5   23.00   17.50
   5  -3  -5  -12.90   17.50
   5  -3  -5  -18.80   18.30
   5  -3  -5  -30.70   17.10
  -5   3   5    1.00   16.90
   4  -3  -5  107.69   20.00
   4  -3  -5  115.59   19.30
  -4   3   5  115.49   18.60
   3  -3  -5  757.12   33.40
   3  -3  -5  759.12   34.10
  -3   3   5  737.93   31.90
   2  -3  -5   57.09   18.50
   2  -3  -5   73.69   17.80
   2  -3  -5   84.99   19.00
  -2   3   5   73.69   17.00
   1  -3  -5 1099.19   38.00
   1  -3  -5 1024.60   37.80
   1  -3  -5 1002.40   36.90
  -1   3   5 1066.69   37.50
   0  -3  -5  151.88   19.70
   0  -3  -5  171.88   19.90
   0  -3  -5  138.19   19.00
   0   3   5  170.48   18.40
  -1  -3  -5   29.20   18.90
  -1  -3  -5   15.90   15.90
  -1  -3  -5   10.70   17.70
  -1  -3  -5   75.99   16.80
   1   3   5   18.90   16.30
  -2  -3  -5   17.30   18.80
  -2  -3  -5   -4.30   16.10
  -2  -3  -5   41.00   17.40
  -2  -3  -5   -1.90   17.20
   2   3   5  -12.20   15.80
  -3  -3  -5   -8.90   16.30
  -3  -3  -5   20.20   16.80
  -3  -3  -5  -13.40   18.60
  -3  -3  -5   -8.40   17.10
   3   3   5    4.00   16.40
  -4  -3  -5   44.70   19.90
  -4  -3  -5   93.59   18.80
  -4  -3  -5   61.39   17.00
  -4  -3  -5   41.60   16.90
   4   3   5   67.19   17.00
  -5  -3  -5  751.82   35.70
  -5  -3  -5  688.63   33.10
  -5  -3  -5  719.83   31.50
  -5  -3  -5  737.13   31.70
   5   3   5  655.93   32.20
  -6  -3  -5  548.55   35.00
  -6  -3  -5  491.05   29.70
  -6  -3  -5  495.55   29.90
  -6  -3  -5  452.35   29.00
   6   3   5  389.66   31.30
  -7  -3  -5   61.39   17.90
  -7  -3  -5   68.39   20.40
  -7  -3  -5   63.89   22.20
  -7  -3  -5   29.10   18.10
  -8  -3  -5   14.80   23.10
  -8  -3  -5   22.80   19.20
  -8  -3  -5  -20.50   18.50
  -8  -3  -5   43.60   20.90
  -9  -3  -5    9.40   23.40
  -9  -3  -5   29.70   18.80
  -9  -3  -5   22.70   20.00
 -10  -3  -5   89.69   21.90
 -10  -3  -5  122.69   26.10
 -10  -3  -5   87.09   21.60
 -11  -3  -5  -21.40   21.70
 -11  -3  -5   28.20   24.90
 -12  -3  -5   49.50   23.50
 -12  -3  -5   32.60   26.00
 -13  -3  -5   42.50   24.60
 -13  -3  -5   41.40   27.90
 -14  -3  -5   32.00   28.10
 -14  -3  -5  -15.60   25.90
 -15  -3  -5   36.30   28.90
 -15  -3  -5   -1.80   26.80
 -16  -3  -5   22.70   29.70
 -16  -3  -5   33.50   26.60
  16  -4  -5   44.40   34.00
  16  -4  -5   69.39   39.80
  15  -4  -5   -7.30   31.60
  15  -4  -5  -78.29   35.80
  14  -4  -5  224.38   39.90
  14  -4  -5  229.28   35.50
 -14   4   5  141.19   49.20
  13  -4  -5  128.89   36.00
  13  -4  -5  170.68   32.70
 -13   4   5  119.79   32.80
  12  -4  -5   14.30   29.00
  12  -4  -5  -25.40   32.60
 -12   4   5    9.60   28.00
  11  -4  -5   18.70   28.00
  11  -4  -5   22.40   31.10
 -11   4   5   -1.20   26.50
  10  -4  -5   30.50   26.30
  10  -4  -5   33.20   29.40
 -10   4   5   57.99   26.80
   9  -4  -5   15.40   28.60
   9  -4  -5  -16.90   24.30
  -9   4   5    3.70   23.50
   8  -4  -5   45.40   22.40
   8  -4  -5   13.20   26.70
  -8   4   5  -61.09   22.60
   7  -4  -5  660.63   41.80
   7  -4  -5  625.84   35.30
  -7   4   5  591.14   37.10
   6  -4  -5   32.20   21.90
   6  -4  -5   67.79   24.10
  -6   4   5   55.89   21.00
   5  -4  -5   84.19   23.70
   5  -4  -5  119.59   22.60
  -5   4   5   71.09   20.60
   4  -4  -5  -32.70   20.80
   4  -4  -5   17.60   20.80
   4  -4  -5   28.80   19.30
  -4   4   5    9.30   19.00
   3  -4  -5  395.06   27.50
   3  -4  -5  415.86   31.50
   3  -4  -5  394.56   30.10
  -3   4   5  425.16   29.40
   2  -4  -5   82.79   20.30
   2  -4  -5  126.49   22.00
   2  -4  -5   89.59   21.40
  -2   4   5  127.59   19.40
   1  -4  -5  119.79   20.90
   1  -4  -5  109.99   20.10
   1  -4  -5  113.59   21.10
  -1   4   5   94.59   20.00
   0  -4  -5   79.69   20.40
   0  -4  -5   77.19   19.90
   0  -4  -5   83.29   20.60
   0   4   5   55.69   18.20
  -1  -4  -5   16.10   23.00
  -1  -4  -5  -17.30   18.50
  -1  -4  -5   23.80   19.60
  -1  -4  -5   19.10   19.80
  -2  -4  -5   54.79   20.40
  -2  -4  -5   59.29   20.60
  -2  -4  -5   50.59   19.30
  -2  -4  -5   63.59   23.60
  -3  -4  -5  255.27   24.50
  -3  -4  -5  190.08   25.90
  -3  -4  -5  225.48   21.70
  -3  -4  -5  256.07   23.00
  -4  -4  -5    7.90   23.60
  -4  -4  -5   73.69   19.20
  -4  -4  -5   69.49   21.00
  -4  -4  -5   43.90   22.10
  -5  -4  -5  -24.40   20.10
  -5  -4  -5  -37.10   23.10
  -5  -4  -5   17.40   22.00
  -5  -4  -5  -29.10   18.20
  -6  -4  -5    3.10   24.90
  -6  -4  -5    6.80   20.70
  -6  -4  -5   24.10   22.40
  -6  -4  -5   -1.20   18.60
  -7  -4  -5   99.29   24.40
  -7  -4  -5   71.69   20.20
  -7  -4  -5   90.09   26.90
  -8  -4  -5   82.59   20.70
  -8  -4  -5  102.69   26.00
  -8  -4  -5   78.69   24.70
  -9  -4  -5   49.50   25.30
  -9  -4  -5  -18.40   25.80
  -9  -4  -5   25.30   20.00
 -10  -4  -5   56.79   32.20
 -10  -4  -5   34.10   21.90
 -10  -4  -5    6.60   26.10
 -11  -4  -5   20.10   22.60
 -11  -4  -5  -26.40   26.20
 -12  -4  -5   81.19   27.60
 -12  -4  -5   75.39   24.50
 -13  -4  -5   21.80   24.80
 -13  -4  -5   -0.60   27.50
 -14  -4  -5   18.60   25.80
 -14  -4  -5  -29.50   28.20
  14  -5  -5    9.60   39.60
  14  -5  -5  -22.60   32.30
  13  -5  -5  109.59   39.50
  13  -5  -5   35.60   32.10
  12  -5  -5   66.89   37.60
  12  -5  -5   77.39   30.70
  11  -5  -5   34.00   27.70
  11  -5  -5   19.10   34.40
  10  -5  -5   -8.10   25.30
  10  -5  -5  -18.20   32.60
   9  -5  -5   90.29   32.20
   9  -5  -5   93.99   25.80
   8  -5  -5  206.08   32.60
   7  -5  -5   59.89   29.60
   6  -5  -5   23.40   27.20
   5  -5  -5   31.80   26.10
   4  -5  -5  -14.80   24.60
   3  -5  -5   26.90   28.40
   3  -5  -5   28.90   24.30
   2  -5  -5   69.39   26.20
   2  -5  -5   48.30   23.30
   1  -5  -5  -12.10   22.00
   1  -5  -5  -23.90   24.60
   0  -5  -5   42.10   22.10
   0  -5  -5   62.09   26.70
  -1  -5  -5  150.38   23.60
  -1  -5  -5  174.18   27.70
  -1  -5  -5  188.78   30.20
  -2  -5  -5   46.50   26.40
  -2  -5  -5   27.40   20.80
  -2  -5  -5   28.60   27.40
  -3  -5  -5  -25.50   26.70
  -3  -5  -5  -37.00   25.90
  -3  -5  -5    5.30   20.70
  -4  -5  -5    7.50   19.90
  -4  -5  -5  -17.90   26.60
  -4  -5  -5  -16.70   25.90
  -5  -5  -5   17.90   20.30
  -5  -5  -5    5.80   26.20
  -5  -5  -5   51.99   27.80
  -6  -5  -5    5.00   28.80
  -6  -5  -5    3.40   27.90
  -6  -5  -5   -7.70   19.80
  -7  -5  -5   54.19   28.90
  -7  -5  -5   -9.90   19.70
  -7  -5  -5   20.30   27.60
  -8  -5  -5   53.29   29.30
  -8  -5  -5   54.29   21.00
  -8  -5  -5   59.79   31.90
  -9  -5  -5   52.39   20.60
  -9  -5  -5   20.40   27.90
 -10  -5  -5  107.79   29.00
 -10  -5  -5  108.39   23.20
 -11  -5  -5   39.80   23.40
 -11  -5  -5   57.89   29.10
  10  -6  -5   36.00   34.70
   9  -6  -5  135.69   35.40
   8  -6  -5   41.30   32.30
   7  -6  -5  133.19   32.30
   6  -6  -5   73.59   30.10
   5  -6  -5  -26.50   27.80
   4  -6  -5   11.20   26.60
   3  -6  -5   65.69   26.80
   2  -6  -5  163.98   27.40
   1  -6  -5   66.39   24.80
   0  -6  -5  -56.59   22.30
  -1  -6  -5  -13.40   22.20
  -1  -6  -5  -18.50   31.50
  -2  -6  -5   61.89   23.40
  -2  -6  -5   78.49   32.70
  -3  -6  -5  -16.90   31.10
  -3  -6  -5   10.80   22.40
  -4  -6  -5   98.99   22.40
  -4  -6  -5  146.09   31.90
  -5  -6  -5   30.40   31.10
  -5  -6  -5   35.20   20.50
  -6  -6  -5    3.00   30.10
  -6  -6  -5  -22.60   20.00
  -7  -6  -5   39.40   30.50
  -7  -6  -5  -13.50   20.00
  -3  -6   6   -7.10   20.60
  -2  -6   6   -1.10   22.20
  -1  -6   6   71.29   24.00
   0  -6   6   45.50   25.90
   1  -6   6   35.10   27.00
   2  -6   6    5.70   19.60
   2  -6   6   24.00   28.80
   3  -6   6  -15.20   22.20
   4  -6   6    6.30   24.00
   5  -6   6   26.50   26.60
   6  -6   6   -3.90   28.10
  -2  -5   6   16.80   17.60
  -1  -5   6   76.79   19.60
   0  -5   6  137.89   22.10
   1  -5   6   -6.00   18.00
   1  -5   6    6.40   21.90
   1  -5   6   37.10   15.10
   2  -5   6   76.79   21.10
   2  -5   6   49.20   23.90
   2  -5   6    1.80   16.10
   3  -5   6   30.60   25.30
   3  -5   6    1.20   22.20
   4  -5   6   32.10   24.70
   4  -5   6   20.00   26.50
   5  -5   6  204.78   27.20
   6  -5   6   48.60   26.40
   7  -5   6   28.20   27.90
   8  -5   6   23.10   29.20
   9  -5   6  106.69   32.20
  10  -5   6   31.80   32.50
  11  -5   6   66.49   34.00
 -16  -4   6  170.38   19.30
 -15  -4   6   -9.50   14.80
 -14  -4   6   37.80   14.50
 -13  -4   6  -13.80   12.60
  -2  -4   6  102.59   14.40
  -1  -4   6  338.87   23.00
   0  -4   6  131.89   16.10
   0  -4   6   98.79   13.20
   0  -4   6  113.99   17.40
   1  -4   6  443.96   28.50
   1  -4   6  471.85   26.60
   1  -4   6  392.46   23.30
   2  -4   6   31.50   19.40
   2  -4   6   67.29   18.70
   2  -4   6   63.39   14.70
   3  -4   6  258.97   23.60
   3  -4   6  201.58   22.80
   3  -4   6  226.28   18.40
   4  -4   6   42.60   16.70
   4  -4   6   16.20   21.30
   4  -4   6   85.89   22.70
   5  -4   6    1.10   22.20
   5  -4   6    2.30   22.10
   6  -4   6   50.89   27.00
   6  -4   6   26.60   24.40
   7  -4   6  158.38   28.70
   8  -4   6   54.59   28.20
   9  -4   6  100.39   30.50
  10  -4   6   -9.90   30.40
  11  -4   6   16.30   32.10
  12  -4   6   16.90   34.30
  13  -4   6  -12.50   36.10
 -18  -3   6   -4.30   20.10
 -18  -3   6    6.10   16.50
 -17  -3   6   57.49   16.30
 -17  -3   6   81.39   19.70
 -16  -3   6   61.99   18.10
 -15  -3   6  -31.40   15.90
 -14  -3   6   10.10   14.20
 -13  -3   6   34.80   14.30
 -12  -3   6  434.06   22.10
 -11  -3   6   79.89   12.40
  -2  -3   6   75.99   11.50
  -1  -3   6  113.69   13.50
  -1  -3   6   88.09   12.00
   0  -3   6   46.20   14.00
   0  -3   6   77.89   13.50
   0  -3   6   59.89   11.70
   1  -3   6   75.69   15.20
   1  -3   6   75.59   13.00
   1  -3   6   66.09   15.20
   2  -3   6  100.39   17.40
   2  -3   6   93.09   14.40
   2  -3   6  105.79   17.00
  -3   3  -6    0.20   14.50
   3  -3   6  -11.00   16.90
   3  -3   6    8.80   13.30
   3  -3   6   19.10   16.80
  -4   3  -6   46.60   16.20
   4  -3   6   45.80   14.40
   4  -3   6   38.70   18.00
   4  -3   6   46.30   18.90
  -5   3  -6  500.25   28.40
   5  -3   6  438.96   29.00
   5  -3   6  390.06   25.80
   5  -3   6  485.35   32.80
  -6   3  -6   58.09   18.60
   6  -3   6   93.59   20.30
   6  -3   6   77.69   22.70
  -7   3  -6   77.39   21.60
   7  -3   6  118.09   24.60
   7  -3   6  113.79   22.00
  -8   3  -6  111.89   23.90
   8  -3   6  155.88   27.40
  -9   3  -6   56.39   24.20
   9  -3   6   35.30   27.50
 -10   3  -6  -29.70   25.00
  10  -3   6  -12.00   27.80
  11  -3   6  -12.60   29.80
  12  -3   6   30.10   32.20
  13  -3   6   18.00   33.20
  14  -3   6   44.00   35.90
  15  -3   6   50.89   37.70
 -19  -2   6    3.10   20.20
 -19  -2   6  -16.40   22.90
 -18  -2   6   30.40   19.40
 -18  -2   6   40.60   22.10
 -17  -2   6   98.09   19.80
 -17  -2   6  111.29   22.40
 -16  -2   6  -38.50   17.80
 -16  -2   6   17.20   16.90
 -15  -2   6  107.59   16.50
 -15  -2   6  137.59   19.70
 -15  -2   6  109.49   18.00
 -14  -2   6   13.80   13.60
 -14  -2   6   22.00   15.50
 -14  -2   6   29.90   16.40
 -13  -2   6   41.60   12.70
 -13  -2   6   37.20   14.30
 -13  -2   6   47.30   15.60
 -12  -2   6  -14.00   11.10
 -12  -2   6    5.20   13.70
 -12  -2   6   19.80   12.70
 -11  -2   6  149.88   13.70
 -11  -2   6  136.79   14.70
 -11  -2   6  121.09   12.30
 -10  -2   6   -3.70    9.20
 -10  -2   6   15.70   11.50
  -9  -2   6  109.39   12.00
  -8  -2   6   21.30   10.20
   6   2  -6   19.40   16.00
   5   2  -6   32.70   15.00
   4   2  -6   90.39   14.30
  -3  -2   6  485.15   18.40
  -2  -2   6   98.99   10.50
  -2  -2   6   84.89   10.30
  -2  -2   6   95.59   11.50
  -2  -2   6   89.39   11.20
  -1  -2   6  347.47   18.30
  -1  -2   6  347.37   18.80
  -1  -2   6  319.27   18.80
  -1  -2   6  342.17   19.60
   0  -2   6   50.09   11.80
   0  -2   6   37.00   13.00
   0  -2   6   27.60   13.00
   0  -2   6   56.29   13.90
   1  -2   6  321.07   23.10
   1  -2   6  352.46   20.80
   1  -2   6  324.77   22.20
  -2   2  -6  391.06   23.50
   2  -2   6  422.46   25.20
   2  -2   6  371.06   22.20
   2  -2   6  442.56   25.10
  -3   2  -6  308.67   23.20
   3  -2   6  334.67   24.90
   3  -2   6  344.07   22.70
   3  -2   6  325.27   25.50
  -4   2  -6    6.00   14.40
   4  -2   6    7.40   17.20
   4  -2   6   38.10   16.50
  -5   2  -6   13.60   15.80
   5  -2   6   36.40   18.90
   5  -2   6  -23.30   16.50
  -6   2  -6   23.90   16.60
   6  -2   6    6.30   18.40
   6  -2   6   28.60   20.10
  -7   2  -6   93.79   19.40
   7  -2   6   97.79   20.60
   7  -2   6   77.29   22.30
  -8   2  -6  279.57   25.00
  -8   2  -6  324.37   25.50
   8  -2   6  347.17   28.40
  -9   2  -6   -4.50   21.50
   9  -2   6  -22.80   24.90
 -10   2  -6   34.30   23.40
  10  -2   6  -26.10   26.60
 -11   2  -6  -35.40   24.00
  11  -2   6   47.80   29.90
 -12   2  -6   22.20   26.10
 -13   2  -6    3.60   28.60
 -14   2  -6  -22.50   30.00
  14  -2   6   -8.60   32.30
 -15   2  -6   23.90   32.90
  15  -2   6   22.10   33.70
 -16   2  -6   33.20   34.00
  16  -2   6  -43.80   34.00
 -20  -1   6  -11.80   22.80
 -20  -1   6  -29.40   24.30
 -19  -1   6   51.79   23.50
 -19  -1   6   60.29   23.80
 -18  -1   6   11.00   22.60
 -18  -1   6   50.09   21.80
 -17  -1   6   70.99   22.40
 -17  -1   6   47.90   20.60
 -16  -1   6   14.70   20.60
 -16  -1   6    9.50   19.10
 -15  -1   6  -10.10   18.90
 -15  -1   6   -4.70   17.90
 -14  -1   6   32.10   16.80
 -14  -1   6   -6.40   18.00
 -14  -1   6    0.00   14.00
 -13  -1   6  543.35   30.00
 -13  -1   6  650.33   29.00
 -13  -1   6  585.44   26.70
 -12  -1   6  203.78   16.20
 -12  -1   6  234.58   18.00
 -12  -1   6  219.68   19.40
 -11  -1   6  281.77   20.00
 -11  -1   6  343.37   22.60
 -11  -1   6  332.47   22.90
 -10  -1   6  554.94   24.30
 -10  -1   6  555.94   24.10
 -10  -1   6  549.85   24.70
  -9  -1   6  689.13   25.60
  -9  -1   6  665.13   25.50
  -9  -1   6  624.64   25.20
  -8  -1   6  594.34   23.90
  -8  -1   6  562.74   23.90
  -7  -1   6 1834.12   47.30
  -7  -1   6 1802.12   47.10
  -7  -1   6 1827.52   46.50
   6   1  -6   99.39   18.20
  -6  -1   6  131.69   13.00
  -6  -1   6  111.59   11.70
  -6  -1   6  151.88   13.00
   5   1  -6    2.40   15.30
  -5  -1   6   29.30   10.40
  -5  -1   6   25.60   11.70
  -5  -1   6   17.90   11.10
   4   1  -6   56.79   14.50
  -4  -1   6   67.49   11.90
  -4  -1   6   44.80   11.00
  -4  -1   6   52.29   11.80
  -4  -1   6   42.90   11.30
  -3  -1   6 1670.83   42.90
  -3  -1   6 1671.53   42.90
  -3  -1   6 1658.73   43.20
  -3  -1   6 1753.72   43.10
  -2  -1   6   90.89   12.10
  -2  -1   6   86.79   11.70
  -2  -1   6   98.69   11.60
  -2  -1   6   90.09   12.20
   1   1  -6 5442.36  125.49
  -1  -1   6 5384.76  125.59
  -1  -1   6 5513.55  125.69
  -1  -1   6 5509.75  125.59
  -1  -1   6 5387.26  125.59
   0   1  -6 1699.43   44.60
   0  -1   6 1713.73   44.40
   0  -1   6 1719.73   45.10
   0  -1   6 1728.83   45.10
   0  -1   6 1683.43   45.10
  -1   1  -6 1345.67   37.60
   1  -1   6 1295.17   37.00
   1  -1   6 1284.67   37.90
   1  -1   6 1348.27   37.90
   1  -1   6 1287.07   37.50
  -2   1  -6  273.37   17.40
   2  -1   6  235.38   18.20
   2  -1   6  258.07   18.10
   2  -1   6  222.38   18.00
  -3   1  -6  763.02   29.80
  -3   1  -6  717.83   33.10
   3  -1   6  766.82   31.80
   3  -1   6  736.03   31.50
   3  -1   6  728.13   31.40
  -4   1  -6 1780.72   51.29
  -4   1  -6 1808.92   50.09
   4  -1   6 1768.02   51.69
   4  -1   6 1696.93   50.19
  -5   1  -6    9.50   18.10
  -5   1  -6  -10.80   16.00
   5  -1   6  -24.10   17.70
  -6   1  -6   74.39   18.90
  -6   1  -6   63.19   17.40
   6  -1   6   59.79   19.70
  -7   1  -6  198.68   19.70
  -7   1  -6  170.38   21.10
   7  -1   6  220.78   23.10
  -8   1  -6   30.00   17.50
  -8   1  -6   15.80   19.60
   8  -1   6   -2.60   21.40
  -9   1  -6    0.50   20.00
  -9   1  -6   40.60   19.80
   9  -1   6   34.70   23.40
 -10   1  -6   40.40   22.80
 -10   1  -6   22.30   22.70
  10  -1   6   17.20   25.80
 -11   1  -6   -0.70   24.30
 -11   1  -6   24.40   23.30
  11  -1   6   27.10   28.50
 -12   1  -6  -12.40   25.80
 -12   1  -6    2.20   43.90
  12  -1   6   71.79   29.80
 -13   1  -6  286.57   32.40
  13  -1   6  282.57   33.90
 -14   1  -6  -22.50   28.40
  14  -1   6   20.90   32.60
 -15   1  -6   14.40   30.20
  15  -1   6    1.50   32.40
 -16   1  -6   -4.60   31.90
 -17   1  -6  146.59   36.40
 -20   0   6   36.30   26.80
 -20   0   6   35.00   26.20
 -19   0   6   33.40   24.60
 -19   0   6    9.80   25.00
 -18   0   6  -21.90   23.20
 -18   0   6   -9.90   23.00
 -17   0   6   14.00   22.50
 -17   0   6  -10.30   21.50
 -16   0   6   35.90   21.90
 -16   0   6   58.69   21.70
 -15   0   6   28.10   20.20
 -15   0   6  -25.00   19.10
  14   0  -6   49.40   20.00
 -14   0   6   51.19   19.80
 -14   0   6   42.50   19.10
  13   0  -6  -23.60   17.60
 -13   0   6   -8.50   17.60
 -13   0   6  -34.90   16.30
  12   0  -6   46.20   17.50
 -12   0   6   41.00   18.90
 -12   0   6   30.70   17.50
 -12   0   6   37.30   16.60
  11   0  -6  -10.40   15.30
 -11   0   6   15.40   15.20
 -11   0   6  -20.30   15.10
  10   0  -6  123.29   17.10
 -10   0   6   97.99   16.80
 -10   0   6  106.09   14.30
 -10   0   6  112.39   16.70
   9   0  -6    0.80   14.80
  -9   0   6   -1.80   14.70
  -9   0   6   -3.10   14.40
  -9   0   6    5.80   12.30
   8   0  -6 1012.10   34.50
  -8   0   6 1020.60   34.40
  -8   0   6  996.40   33.50
  -8   0   6  960.60   34.50
   7   0  -6   -5.60   14.10
  -7   0   6   -2.40   13.90
  -7   0   6  -31.20   13.30
  -7   0   6  -10.00   12.70
   6   0  -6   90.79   18.00
   6   0  -6   79.49   14.50
  -6   0   6   43.30   13.00
  -6   0   6   50.29   14.50
  -6   0   6   85.29   14.10
   5   0  -6   -6.00   16.20
   5   0  -6    2.90   12.20
  -5   0   6   -8.20   12.70
  -5   0   6    2.70   13.00
  -5   0   6   -4.50   12.90
   4   0  -6  326.47   19.70
   4   0  -6  254.07   20.10
  -4   0   6  288.17   17.10
  -4   0   6  249.88   20.00
  -4   0   6  306.17   17.70
   3   0  -6    1.70   12.30
  -3   0   6  -17.50   13.00
  -3   0   6  -32.00   12.70
  -3   0   6   28.10   13.30
   2   0  -6  655.73   25.50
   2   0  -6  667.43   29.80
  -2   0   6  646.94   26.80
  -2   0   6  685.03   26.10
  -2   0   6  611.84   26.10
   1   0  -6    8.40   12.90
   1   0  -6    0.30   14.70
  -1   0   6   -3.20   13.70
  -1   0   6    3.30   13.40
  -1   0   6   15.60   13.60
   0   0  -6  -11.10   12.60
   0   0  -6    4.90   14.60
   0   0   6    3.50   13.60
   0   0   6  -27.30   13.70
   0   0   6    3.40   13.60
  -1   0  -6   21.90   13.20
  -1   0  -6  -27.10   14.50
   1   0   6   33.90   14.40
   1   0   6   12.30   14.10
   1   0   6    2.50   14.30
  -2   0  -6   71.99   14.90
  -2   0  -6   94.89   17.10
   2   0   6  100.29   15.40
   2   0   6   92.99   16.00
  -3   0  -6   12.70   17.50
  -3   0  -6   14.50   14.90
   3   0   6    3.20   15.90
   3   0   6    0.70   15.80
  -4   0  -6  634.04   31.70
  -4   0  -6  708.53   30.30
   4   0   6  668.63   31.10
   4   0   6  649.74   31.40
  -5   0  -6  -15.50   18.60
  -5   0  -6   23.00   16.90
   5   0   6   -8.90   17.70
  -6   0  -6   19.00   19.40
  -6   0  -6   12.10   17.10
   6   0   6  -16.80   17.80
  -7   0  -6   -2.30   19.20
  -7   0  -6    4.40   17.60
   7   0   6  -30.10   18.30
  -8   0  -6  970.20   38.70
  -8   0  -6  984.30   40.00
   8   0   6  954.80   39.70
  -9   0  -6   -1.80   18.60
  -9   0  -6   -7.20   19.80
   9   0   6   10.20   21.50
 -10   0  -6  138.29   24.10
 -10   0  -6  115.09   22.00
  10   0   6  115.99   25.40
 -11   0  -6   39.20   23.20
 -11   0  -6   42.10   23.30
  11   0   6  -45.40   25.50
 -12   0  -6  215.98   28.10
 -12   0  -6  182.68   28.20
  12   0   6  263.57   31.90
 -13   0  -6   21.20   27.00
 -13   0  -6   18.90   25.90
  13   0   6  -24.50   28.30
 -14   0  -6   46.40   27.40
 -14   0  -6   14.00   29.60
  14   0   6  -14.60   31.70
 -15   0  -6   38.00   31.00
 -16   0  -6   -1.90   30.60
 -17   0  -6  -10.60   32.70
 -20   1   6    6.60   29.40
 -19   1   6   91.09   28.20
 -19   1   6  105.39   30.40
 -18   1   6   34.30   25.00
 -18   1   6   64.49   27.00
 -17   1   6   63.89   25.60
 -17   1   6   70.69   24.90
 -16   1   6   17.30   22.60
 -16   1   6   25.10   24.50
  15  -1  -6  -51.69   22.20
 -15   1   6  -23.20   20.90
 -15   1   6  -12.30   22.40
  14  -1  -6    6.90   21.80
 -14   1   6   28.00   21.30
 -14   1   6   44.90   20.40
  13  -1  -6  662.03   37.10
 -13   1   6  662.13   36.50
 -13   1   6  623.04   34.70
  12  -1  -6  204.58   22.40
 -12   1   6  194.78   21.70
 -12   1   6  211.28   21.40
  11  -1  -6  316.87   23.70
 -11   1   6  329.27   22.60
 -11   1   6  317.77   23.00
  10  -1  -6  561.84   30.10
 -10   1   6  562.84   29.10
 -10   1   6  564.24   29.70
   9  -1  -6  639.44   31.30
  -9   1   6  645.14   30.90
  -9   1   6  704.13   31.70
   8  -1  -6  590.64   31.80
  -8   1   6  611.64   29.00
  -8   1   6  612.34   30.70
   7  -1  -6 1781.22   55.19
   7  -1  -6 1829.02   52.39
  -7   1   6 1884.91   51.99
  -7   1   6 1839.02   51.99
   6  -1  -6  123.19   20.10
   6  -1  -6  109.09   17.60
  -6   1   6  135.29   17.80
  -6   1   6  122.99   17.70
   5  -1  -6    6.80   17.70
   5  -1  -6    6.70   14.60
  -5   1   6   20.70   15.60
  -5   1   6   25.00   14.60
   4  -1  -6   40.20   14.70
   4  -1  -6   36.00   16.40
  -4   1   6   58.19   15.90
  -4   1   6   29.60   14.50
   3  -1  -6 1713.33   48.20
  -3   1   6 1807.02   49.00
  -3   1   6 1711.13   47.80
   2  -1  -6  103.39   16.10
   2  -1  -6  102.59   15.30
  -2   1   6  143.99   16.30
  -2   1   6   97.59   16.30
   1  -1  -6 5872.81  132.99
   1  -1  -6 5608.94  132.59
  -1   1   6 5610.14  132.09
  -1   1   6 5535.25  132.39
   0  -1  -6 1819.72   50.29
   0  -1  -6 1679.83   48.40
   0   1   6 1795.12   49.00
   0   1   6 1809.42   48.30
  -1  -1  -6 1306.17   39.80
  -1  -1  -6 1406.96   52.99
  -1  -1  -6 1268.17   41.40
   1   1   6 1412.86   40.20
   1   1   6 1321.57   41.00
  -2  -1  -6  226.28   18.10
  -2  -1  -6  219.98   17.50
  -2  -1  -6  255.77   20.80
   2   1   6  270.17   19.10
   2   1   6  209.38   18.60
  -3  -1  -6  813.02   34.60
  -3  -1  -6  762.82   31.60
  -3  -1  -6  790.72   30.80
   3   1   6  785.62   31.60
   3   1   6  817.52   33.00
  -4  -1  -6 1815.62   51.99
  -4  -1  -6 1771.42   50.19
  -4  -1  -6 1750.22   49.00
   4   1   6 1655.63   49.60
   4   1   6 1677.93   49.90
  -5  -1  -6    6.60   19.50
  -5  -1  -6   -7.90   15.40
  -5  -1  -6   13.80   17.10
   5   1   6   -2.40   17.60
   5   1   6   -9.80   17.40
  -6  -1  -6   68.29   17.80
  -6  -1  -6   78.49   17.10
  -6  -1  -6   83.69   20.50
   6   1   6   71.99   19.70
  -7  -1  -6  192.68   19.20
  -7  -1  -6  196.78   21.80
  -7  -1  -6  199.18   20.50
   7   1   6  180.98   21.30
  -8  -1  -6  -22.50   19.40
  -8  -1  -6    0.80   16.60
  -8  -1  -6   -0.90   18.10
   8   1   6    4.90   18.90
  -9  -1  -6   -5.50   17.90
  -9  -1  -6   12.00   21.60
  -9  -1  -6  -21.60   19.00
   9   1   6  -33.30   19.70
 -10  -1  -6   14.50   21.20
 -10  -1  -6   -3.60   21.80
 -10  -1  -6   24.30   20.40
  10   1   6   36.30   24.80
 -11  -1  -6    4.60   23.10
 -11  -1  -6   31.60   24.30
  11   1   6   59.59   26.30
 -12  -1  -6  -40.80   24.20
 -12  -1  -6    8.90   23.70
  12   1   6   21.50   27.40
 -13  -1  -6  231.88   30.30
 -13  -1  -6  260.37   30.00
 -14  -1  -6   20.70   28.40
 -14  -1  -6    6.00   26.10
 -15  -1  -6  -47.20   28.50
 -15  -1  -6  -16.50   26.30
 -16  -1  -6   14.10   29.00
 -16  -1  -6   -6.50   30.40
 -17  -1  -6  111.69   33.10
 -19   2   6  -32.40   31.60
 -18   2   6   42.80   30.40
  17  -2  -6   91.19   35.20
 -17   2   6  106.99   31.30
  16  -2  -6    6.00   29.00
 -16   2   6   36.50   28.00
  15  -2  -6  129.59   29.80
 -15   2   6  140.89   27.60
 -15   2   6   90.09   24.20
  14  -2  -6   43.40   26.70
 -14   2   6   44.30   21.80
 -14   2   6   34.80   23.90
  13  -2  -6   22.90   24.30
 -13   2   6   48.90   23.40
 -13   2   6   37.00   20.90
  12  -2  -6   35.70   23.20
 -12   2   6   -1.00   21.20
 -12   2   6    2.20   18.80
  11  -2  -6  158.08   24.20
 -11   2   6  174.28   23.00
 -11   2   6  146.89   21.00
  10  -2  -6   37.50   21.00
 -10   2   6   35.30   19.00
 -10   2   6   -2.60   17.80
   9  -2  -6  118.09   23.00
   9  -2  -6  142.49   21.80
  -9   2   6  150.58   17.90
  -9   2   6  129.89   20.70
   8  -2  -6    0.90   20.50
   8  -2  -6   21.50   19.00
  -8   2   6   71.39   18.30
  -8   2   6   13.90   16.80
   7  -2  -6  481.65   32.00
   7  -2  -6  426.16   30.80
  -7   2   6  464.75   28.50
  -7   2   6  425.16   29.00
   6  -2  -6   -1.70   18.50
   6  -2  -6   25.30   19.90
  -6   2   6    8.20   17.40
  -6   2   6   -3.90   15.60
   5  -2  -6   14.00   18.30
   5  -2  -6   28.70   17.60
  -5   2   6   27.00   16.90
  -5   2   6   10.40   17.60
   4  -2  -6   83.59   18.20
  -4   2   6   81.19   18.10
  -4   2   6  123.19   17.90
   3  -2  -6  566.54   30.50
   3  -2  -6  551.54   29.50
  -3   2   6  526.15   28.40
  -3   2   6  504.45   28.10
   2  -2  -6  100.09   18.20
   2  -2  -6   93.79   18.10
  -2   2   6  108.69   17.90
  -2   2   6  103.69   18.90
   1  -2  -6  411.16   30.00
   1  -2  -6  402.16   28.20
   1  -2  -6  422.26   27.00
  -1   2   6  398.56   27.60
   0  -2  -6   60.09   18.50
   0  -2  -6   52.89   18.90
   0  -2  -6   47.30   17.60
   0   2   6   54.19   17.60
  -1  -2  -6  385.16   27.70
  -1  -2  -6  369.56   24.30
  -1  -2  -6  364.26   27.30
   1   2   6  373.56   27.00
  -2  -2  -6  450.85   28.10
  -2  -2  -6  417.86   25.70
  -2  -2  -6  414.86   30.70
   2   2   6  404.46   28.10
  -3  -2  -6  330.27   24.10
  -3  -2  -6  319.47   25.90
  -3  -2  -6  336.57   26.80
   3   2   6  346.47   22.00
  -4  -2  -6   44.90   16.20
  -4  -2  -6   20.00   16.70
  -4  -2  -6   31.00   20.20
   4   2   6   26.40   17.20
  -5  -2  -6   22.40   17.10
  -5  -2  -6  -15.60   19.10
  -5  -2  -6   30.20   16.50
   5   2   6   -5.10   17.50
  -6  -2  -6   20.80   17.60
  -6  -2  -6   20.50   19.90
  -6  -2  -6   19.80   16.40
   6   2   6   15.40   18.50
  -7  -2  -6   98.79   22.10
  -7  -2  -6  124.89   19.60
  -7  -2  -6   94.49   17.90
   7   2   6  106.59   20.70
  -8  -2  -6  315.57   26.20
  -8  -2  -6  290.27   22.40
  -8  -2  -6  289.67   23.60
   8   2   6  285.97   24.70
  -9  -2  -6  -11.40   19.30
  -9  -2  -6   49.30   24.20
  -9  -2  -6   13.70   19.10
   9   2   6   -3.50   21.40
 -10  -2  -6   -9.20   23.80
 -10  -2  -6   -9.40   21.30
 -10  -2  -6  -44.00   20.90
 -11  -2  -6  -24.00   22.80
 -11  -2  -6   -6.10   24.90
 -12  -2  -6   28.30   26.10
 -12  -2  -6   17.20   24.30
 -13  -2  -6  -14.00   25.30
 -13  -2  -6   29.00   26.70
 -14  -2  -6  -27.40   28.00
 -14  -2  -6  -18.00   26.70
 -15  -2  -6   32.30   28.40
 -15  -2  -6   31.20   29.50
 -16  -2  -6   33.80   30.10
 -16  -2  -6  -30.00   28.60
  18  -3  -6   53.49   37.90
 -18   3   6   20.70   34.20
  17  -3  -6   97.49   37.70
 -17   3   6  143.19   34.50
  16  -3  -6  118.59   35.90
 -16   3   6   87.89   32.20
  15  -3  -6   46.90   32.10
 -15   3   6  -46.50   27.70
  14  -3  -6   -8.90   30.90
 -14   3   6  -21.70   26.70
  13  -3  -6   13.10   30.20
 -13   3   6   20.50   26.60
  12  -3  -6  580.54   46.50
  12  -3  -6  599.14   43.80
 -12   3   6  682.63   44.20
  11  -3  -6   96.09   26.70
  11  -3  -6  119.29   27.80
 -11   3   6   86.99   24.60
  10  -3  -6  106.49   26.50
  10  -3  -6   84.69   26.00
 -10   3   6   86.49   23.50
 -10   3   6  101.09   20.80
   9  -3  -6   18.70   23.00
   9  -3  -6   30.90   22.90
  -9   3   6   34.10   21.20
  -9   3   6   19.60   18.60
   8  -3  -6  520.25   38.30
   8  -3  -6  511.85   35.90
  -8   3   6  519.45   33.70
  -8   3   6  513.45   29.30
   7  -3  -6  485.85   32.20
   7  -3  -6  446.06   34.30
  -7   3   6  480.45   28.90
  -7   3   6  446.96   30.80
   6  -3  -6  581.94   32.20
   6  -3  -6  595.24   30.90
   6  -3  -6  541.45   34.60
  -6   3   6  589.74   33.00
  -6   3   6  563.64   40.00
   5  -3  -6  288.77   23.40
   5  -3  -6  270.87   24.20
  -5   3   6  265.27   22.60
   4  -3  -6  790.32   36.50
   4  -3  -6  843.52   35.30
  -4   3   6  756.12   33.10
   3  -3  -6  -17.40   17.60
   3  -3  -6   -5.30   18.30
  -3   3   6   -1.70   16.90
   2  -3  -6   51.39   18.90
   2  -3  -6   56.39   18.30
  -2   3   6   30.10   18.40
   1  -3  -6  110.69   19.00
   1  -3  -6  113.39   19.50
   1  -3  -6  147.09   25.00
  -1   3   6  139.59   19.20
   0  -3  -6   85.89   21.10
   0  -3  -6   92.99   18.60
   0  -3  -6   92.79   18.70
   0  -3  -6   55.99   19.20
   0   3   6   39.70   16.90
  -1  -3  -6   62.19   18.00
  -1  -3  -6   75.09   20.60
  -1  -3  -6   90.09   19.10
  -1  -3  -6   84.79   18.80
   1   3   6   67.29   17.70
  -2  -3  -6   88.59   19.30
  -2  -3  -6   60.79   17.90
  -2  -3  -6   68.99   18.20
  -2  -3  -6   68.19   20.80
   2   3   6   96.59   18.50
  -3  -3  -6   -6.00   20.80
  -3  -3  -6   13.90   18.40
  -3  -3  -6   10.40   17.60
  -3  -3  -6    7.50   17.50
   3   3   6   18.60   17.60
  -4  -3  -6   71.29   17.80
  -4  -3  -6    5.10   19.30
  -4  -3  -6   50.79   21.20
  -4  -3  -6   32.60   17.90
   4   3   6   27.90   17.50
  -5  -3  -6  443.26   33.60
  -5  -3  -6  504.65   30.60
  -5  -3  -6  534.35   30.70
  -5  -3  -6  476.75   30.70
   5   3   6  509.05   30.70
  -6  -3  -6   62.49   23.50
  -6  -3  -6   61.49   20.60
  -6  -3  -6  100.19   20.20
  -6  -3  -6   79.99   19.40
   6   3   6   68.69   20.80
  -7  -3  -6   93.19   22.00
  -7  -3  -6  121.69   21.30
  -7  -3  -6  106.59   24.10
  -7  -3  -6   92.29   20.40
  -8  -3  -6  164.88   22.00
  -8  -3  -6  140.19   26.00
  -8  -3  -6  128.89   21.60
  -9  -3  -6   39.90   21.00
  -9  -3  -6   47.50   21.70
  -9  -3  -6   31.00   25.50
 -10  -3  -6    2.10   20.90
 -10  -3  -6  -29.90   25.40
 -11  -3  -6   32.90   27.40
 -11  -3  -6   55.59   23.70
 -12  -3  -6   55.29   24.30
 -12  -3  -6   13.80   27.10
 -13  -3  -6   -7.30   25.60
 -13  -3  -6   53.09   29.80
 -14  -3  -6   26.90   27.60
 -14  -3  -6  -39.70   28.20
 -15  -3  -6   37.90   28.80
 -15  -3  -6   21.20   30.30
  16  -4  -6  469.55   48.30
  16  -4  -6  312.27   39.40
  15  -4  -6   83.59   39.40
  15  -4  -6   38.80   32.40
  14  -4  -6   53.39   36.80
  14  -4  -6   77.99   33.40
 -14   4   6   88.89   34.00
  13  -4  -6   18.00   31.00
  13  -4  -6   -1.10   33.90
 -13   4   6   -9.40   30.20
  12  -4  -6  -14.30   32.00
  12  -4  -6   24.20   29.00
 -12   4   6  -15.90   28.40
  11  -4  -6   51.59   31.90
  11  -4  -6   33.40   28.50
 -11   4   6  124.69   29.40
  10  -4  -6   66.69   26.90
  10  -4  -6  106.99   31.30
 -10   4   6   58.69   26.80
   9  -4  -6   34.70   24.00
   9  -4  -6    2.70   28.00
  -9   4   6   16.30   24.30
   8  -4  -6    6.70   26.50
   8  -4  -6    7.90   22.40
  -8   4   6   19.70   23.30
   7  -4  -6  155.08   27.20
  -7   4   6  151.78   24.80
   6  -4  -6   17.50   24.70
   6  -4  -6  -21.20   23.40
  -6   4   6    2.30   21.10
   5  -4  -6   34.90   23.40
   5  -4  -6   56.69   22.40
  -5   4   6   33.00   20.80
   4  -4  -6   27.10   22.40
   4  -4  -6  -20.70   20.80
  -4   4   6  -10.20   18.80
   3  -4  -6  281.57   24.80
   3  -4  -6  211.08   25.30
   3  -4  -6  277.77   24.80
  -3   4   6  237.18   23.00
   2  -4  -6  134.19   22.70
   2  -4  -6  101.89   21.30
   2  -4  -6  125.99   22.90
  -2   4   6   89.29   20.80
   1  -4  -6  384.76   31.00
   1  -4  -6  447.46   33.80
   1  -4  -6  436.16   31.20
  -1   4   6  388.56   25.80
   0  -4  -6  149.69   22.00
   0  -4  -6   54.29   21.50
   0  -4  -6  117.29   22.00
   0   4   6   88.79   19.70
  -1  -4  -6  469.25   33.00
  -1  -4  -6  431.26   27.80
  -1  -4  -6  443.46   30.80
  -1  -4  -6  457.45   33.10
  -2  -4  -6   15.60   24.30
  -2  -4  -6   43.20   21.10
  -2  -4  -6   40.00   19.80
  -2  -4  -6   73.09   21.40
  -3  -4  -6  229.88   23.40
  -3  -4  -6  253.87   25.00
  -3  -4  -6  330.77   29.00
  -3  -4  -6  301.37   26.20
  -4  -4  -6   50.19   20.00
  -4  -4  -6   14.70   25.80
  -4  -4  -6   71.59   22.60
  -4  -4  -6   93.29   23.90
  -5  -4  -6  -19.60   19.90
  -5  -4  -6  -27.00   22.50
  -5  -4  -6  -14.40   25.20
  -6  -4  -6  111.99   24.40
  -6  -4  -6   32.00   26.10
  -6  -4  -6   28.40   19.90
  -7  -4  -6  174.48   28.90
  -7  -4  -6  145.19   22.70
  -7  -4  -6  186.68   26.20
  -8  -4  -6   42.20   20.70
  -8  -4  -6   47.60   27.20
  -8  -4  -6   54.89   26.00
  -9  -4  -6  109.29   22.90
  -9  -4  -6  134.69   29.00
 -10  -4  -6  -37.50   26.80
 -10  -4  -6  -12.90   21.00
 -11  -4  -6    1.80   28.10
 -11  -4  -6   18.50   24.00
 -12  -4  -6  -13.50   23.20
 -12  -4  -6  -28.20   28.10
 -13  -4  -6   -1.20   25.40
 -13  -4  -6  -36.40   28.70
  14  -5  -6   85.09   42.00
  14  -5  -6   43.00   33.50
  13  -5  -6   30.90   31.80
  13  -5  -6   36.20   38.30
  12  -5  -6   62.39   29.40
  12  -5  -6   41.20   37.30
  11  -5  -6   42.10   27.70
  11  -5  -6  -25.50   34.70
  10  -5  -6   10.20   26.20
  10  -5  -6    2.20   32.40
   9  -5  -6  -66.69   29.60
   8  -5  -6   30.60   30.80
   7  -5  -6  -32.00   28.50
   6  -5  -6   23.90   27.90
   5  -5  -6   45.80   27.20
   4  -5  -6   41.70   25.70
   3  -5  -6   89.59   25.80
   2  -5  -6    1.60   23.90
   1  -5  -6   61.79   24.20
   1  -5  -6   70.29   27.40
   0  -5  -6  179.68   24.90
   0  -5  -6  206.28   28.50
  -1  -5  -6    1.80   28.60
  -1  -5  -6  -47.40   21.60
  -1  -5  -6    5.20   26.10
  -2  -5  -6   -6.90   26.20
  -2  -5  -6   37.20   22.20
  -2  -5  -6   32.00   29.80
  -3  -5  -6   -0.50   21.80
  -3  -5  -6   32.20   27.10
  -3  -5  -6   10.50   28.40
  -4  -5  -6   49.30   29.20
  -4  -5  -6   26.30   21.90
  -4  -5  -6   38.40   27.80
  -5  -5  -6  255.77   30.50
  -5  -5  -6  185.38   24.20
  -5  -5  -6  271.27   31.90
  -6  -5  -6  135.19   39.00
  -6  -5  -6   74.09   22.40
  -6  -5  -6   63.79   29.70
  -7  -5  -6   36.00   21.70
  -7  -5  -6    8.60   29.40
  -8  -5  -6   27.10   21.50
  -8  -5  -6   47.20   30.60
  -9  -5  -6  136.79   30.80
  -9  -5  -6  112.99   23.30
 -10  -5  -6   73.19   23.70
 -10  -5  -6   10.00   29.80
 -11  -5  -6   86.19   24.70
 -11  -5  -6   93.79   31.30
   9  -6  -6  134.49   35.70
   8  -6  -6   11.20   32.10
   7  -6  -6   -8.90   30.70
   6  -6  -6   56.29   30.60
   5  -6  -6  175.28   31.30
   4  -6  -6   46.40   28.20
   3  -6  -6  -19.40   25.70
   2  -6  -6    9.10   26.00
   1  -6  -6   43.60   24.50
   0  -6  -6   87.19   25.60
   0  -6  -6   67.59   34.50
  -1  -6  -6    7.70   23.70
  -1  -6  -6   48.80   33.70
  -2  -6  -6  -18.00   22.90
  -2  -6  -6   15.20   32.80
  -3  -6  -6   35.50   32.50
  -3  -6  -6   26.60   23.20
  -4  -6  -6    7.30   22.70
  -4  -6  -6   18.10   32.00
  -5  -6  -6  105.19   31.80
  -5  -6  -6   79.89   22.70
  -6  -6  -6   59.19   32.70
  -6  -6  -6    5.60   21.90
  -3  -6   7   -5.40   20.50
  -2  -6   7  -18.00   22.10
  -1  -6   7    8.50   24.40
   0  -6   7   72.29   26.80
   1  -6   7   52.19   27.80
   2  -6   7   98.09   30.20
   2  -6   7   92.39   21.30
   3  -6   7  -11.10   22.60
   4  -6   7  -26.70   24.30
   5  -6   7  -34.50   26.40
  -3  -5   7   15.50   16.60
  -2  -5   7  191.98   20.60
  -1  -5   7   43.10   20.40
   0  -5   7   -4.50   21.30
   1  -5   7   15.70   15.40
   1  -5   7   46.20   23.30
   1  -5   7   26.70   19.00
   2  -5   7  260.97   27.70
   2  -5   7  270.87   23.90
   2  -5   7  226.68   20.00
   3  -5   7   53.29   26.10
   3  -5   7   49.99   23.50
   4  -5   7   12.40   30.30
   4  -5   7  -17.10   22.80
   5  -5   7   18.00   24.50
   6  -5   7  143.49   28.80
   7  -5   7   -7.90   28.00
   8  -5   7   56.79   30.30
   9  -5   7  -33.70   30.30
  10  -5   7    0.70   32.80
 -16  -4   7   99.39   18.00
 -15  -4   7   25.70   15.20
 -14  -4   7   41.00   14.50
  -2  -4   7   96.59   15.50
  -1  -4   7  112.09   17.40
   0  -4   7   84.49   15.70
   0  -4   7   67.39   13.10
   0  -4   7   80.79   17.90
   1  -4   7   11.00   17.00
   1  -4   7    0.80   13.80
   1  -4   7    5.60   18.70
   2  -4   7   26.40   20.00
   2  -4   7   -4.50   14.80
   2  -4   7   -4.40   18.60
   3  -4   7   38.40   16.10
   3  -4   7   79.39   22.90
   3  -4   7  -26.70   19.60
   4  -4   7   81.19   23.30
   4  -4   7   40.00   22.10
   5  -4   7   27.90   22.60
   5  -4   7   49.99   24.10
   6  -4   7    7.20   25.10
   7  -4   7  292.77   31.10
   8  -4   7   12.50   27.70
   9  -4   7   81.59   30.50
  10  -4   7   16.40   31.00
  11  -4   7  156.88   35.10
  12  -4   7    7.00   35.30
  13  -4   7   46.70   37.30
 -18  -3   7   18.30   20.40
 -17  -3   7   48.80   19.70
 -16  -3   7   29.30   18.40
 -15  -3   7  218.28   20.00
 -14  -3   7   13.60   15.30
 -13  -3   7  350.16   23.20
 -12  -3   7    8.10   12.80
 -11  -3   7   14.20   11.80
   8   3  -7  789.52   32.80
  -3  -3   7   70.19   10.20
  -2  -3   7  271.47   17.50
  -2  -3   7  289.07   18.40
  -1  -3   7  330.77   19.20
  -1  -3   7  307.27   18.00
  -1  -3   7  297.77   20.50
   0  -3   7   21.10   11.20
   0  -3   7   20.50   13.80
   0  -3   7   13.20   13.80
   1  -3   7   19.20   12.50
   1  -3   7   32.10   15.30
   2  -3   7  192.68   16.00
   2  -3   7  223.28   19.00
  -3   3  -7    9.60   15.50
   3  -3   7    5.20   13.50
   3  -3   7   -2.00   16.60
  -4   3  -7  -13.50   16.30
   4  -3   7   15.10   14.90
   4  -3   7  -27.60   17.30
  -5   3  -7  106.49   19.30
   5  -3   7  117.49   20.70
   5  -3   7   69.39   16.80
  -6   3  -7   -0.10   18.80
   6  -3   7   -7.40   20.30
  -7   3  -7  -21.20   20.20
  -8   3  -7   41.60   22.60
   8  -3   7  120.09   27.20
   9  -3   7   -3.60   26.80
  10  -3   7   30.80   29.70
  11  -3   7  111.39   32.70
  12  -3   7  -18.70   31.80
  13  -3   7    0.20   34.10
  14  -3   7  -25.00   34.70
  15  -3   7   47.70   38.10
 -19  -2   7   -9.50   18.70
 -19  -2   7    9.30   22.30
 -18  -2   7   -3.90   18.20
 -18  -2   7   -3.30   20.40
 -17  -2   7   54.09   18.20
 -17  -2   7   60.79   20.50
 -16  -2   7  212.68   19.80
 -16  -2   7  228.38   22.40
 -15  -2   7   -2.20   15.20
 -15  -2   7   -7.00   17.20
 -15  -2   7   -0.20   13.80
 -14  -2   7   92.59   17.70
 -14  -2   7   89.89   14.60
 -14  -2   7  110.49   16.10
 -13  -2   7  138.89   15.40
 -13  -2   7  141.09   17.70
 -13  -2   7  125.79   13.90
 -12  -2   7   41.90   13.20
 -12  -2   7   46.10   14.40
 -12  -2   7   35.70   12.20
 -11  -2   7  104.09   14.00
 -11  -2   7  102.59   12.30
 -11  -2   7   96.19   12.60
 -10  -2   7  749.23   25.90
  -9  -2   7  337.77   18.10
   8   2  -7  233.68   20.60
  -8  -2   7  230.48   15.70
   7   2  -7  858.11   33.80
  -7  -2   7  803.22   24.80
   6   2  -7  797.82   32.20
   5   2  -7 1602.74   44.60
  -5  -2   7 1538.65   39.70
  -4  -2   7  184.58   12.90
  -4  -2   7  173.38   12.80
  -3  -2   7   41.00   11.10
  -3  -2   7   31.70   10.40
  -3  -2   7   36.30   11.50
  -2  -2   7    7.10   12.20
  -2  -2   7   -9.50   11.20
  -2  -2   7   -2.00   12.00
  -2  -2   7    1.20   10.70
  -1  -2   7 1487.45   41.10
  -1  -2   7 1518.75   40.40
  -1  -2   7 1470.85   40.10
  -1  -2   7 1524.85   40.70
   0  -2   7   20.30   12.10
   0  -2   7    5.40   13.10
   0  -2   7   32.70   14.20
   0  -2   7    4.00   13.80
  -1   2  -7  327.27   22.30
   1  -2   7  339.77   21.20
   1  -2   7  383.76   23.60
   1  -2   7  363.36   23.80
   1  -2   7  326.77   23.00
  -2   2  -7   29.20   14.50
   2  -2   7   28.70   13.10
   2  -2   7  -24.50   15.10
   2  -2   7  -13.00   14.90
  -3   2  -7   20.40   14.90
   3  -2   7   10.70   13.30
   3  -2   7    4.50   16.60
   3  -2   7    8.60   15.90
  -4   2  -7   99.79   16.50
   4  -2   7   80.79   17.80
   4  -2   7   87.29   18.50
  -5   2  -7  102.39   17.10
   5  -2   7   96.39   19.50
   5  -2   7   71.99   18.10
  -6   2  -7  165.48   19.70
   6  -2   7  157.88   22.30
   6  -2   7  152.18   20.60
  -7   2  -7   80.99   20.00
   7  -2   7   79.49   23.00
   7  -2   7   25.70   19.80
  -8   2  -7   14.40   20.50
   8  -2   7   24.60   24.50
  -9   2  -7   47.90   23.30
   9  -2   7   39.20   26.40
 -10   2  -7   18.80   24.70
  10  -2   7  -17.20   27.90
 -11   2  -7   -2.10   26.20
  11  -2   7   36.70   30.90
 -12   2  -7   37.80   28.60
  12  -2   7  148.49   34.10
 -13   2  -7    2.40   29.20
 -14   2  -7  185.08   35.30
 -15   2  -7   -5.50   32.10
  15  -2   7   54.69   35.40
 -16   2  -7  111.69   36.20
  16  -2   7  -28.50   35.60
 -20  -1   7   69.99   24.00
 -20  -1   7   60.09   24.70
 -19  -1   7   -6.00   21.80
 -19  -1   7   -6.80   22.70
 -18  -1   7  106.59   23.60
 -18  -1   7  121.69   23.10
 -17  -1   7  177.88   22.70
 -17  -1   7  202.48   24.10
 -16  -1   7   67.29   19.60
 -16  -1   7   88.99   20.80
 -15  -1   7  175.88   20.70
 -15  -1   7  176.18   21.40
 -14  -1   7  521.25   29.60
 -14  -1   7  468.15   30.10
 -14  -1   7  456.45   26.20
 -13  -1   7   12.20   16.10
 -13  -1   7    7.00   15.20
 -13  -1   7   -3.60   12.80
 -12  -1   7   34.80   14.10
 -12  -1   7   55.29   14.90
 -12  -1   7   55.69   15.60
 -11  -1   7   42.30   13.70
 -11  -1   7   29.60   14.30
 -11  -1   7   27.50   13.00
 -10  -1   7   84.29   14.60
 -10  -1   7   81.79   13.90
  -9  -1   7  193.58   15.60
  -9  -1   7  208.48   16.20
  -9  -1   7  209.88   14.30
  -8  -1   7    6.00   12.60
  -8  -1   7    6.20   12.50
  -8  -1   7    4.60   10.90
   7   1  -7   60.49   19.10
  -7  -1   7   82.49   12.50
  -7  -1   7   58.29   13.40
  -7  -1   7   64.59   12.90
   6   1  -7  184.18   20.50
  -6  -1   7  185.88   14.90
  -6  -1   7  197.58   13.80
  -6  -1   7  188.48   15.20
   5   1  -7  515.75   27.60
  -5  -1   7  521.35   22.20
  -5  -1   7  510.35   23.10
  -5  -1   7  458.55   22.00
  -4  -1   7  711.73   26.30
  -4  -1   7  765.22   25.70
  -4  -1   7  758.52   26.40
  -4  -1   7  731.53   26.30
  -3  -1   7  366.76   21.50
  -3  -1   7  385.26   20.50
  -3  -1   7  348.27   20.10
  -3  -1   7  346.57   20.20
   2   1  -7  296.47   17.70
  -2  -1   7  249.28   15.60
  -2  -1   7  244.98   15.80
  -2  -1   7  251.47   16.20
  -2  -1   7  257.37   15.80
   1   1  -7   20.20   11.40
  -1  -1   7   26.80   12.70
  -1  -1   7   19.40   13.10
  -1  -1   7   10.90   13.40
  -1  -1   7   23.40   11.50
   0   1  -7  998.90   31.90
   0  -1   7  988.00   33.10
   0  -1   7  983.60   31.20
   0  -1   7  993.20   32.20
   0  -1   7 1006.00   32.70
  -1   1  -7 1016.70   33.30
   1  -1   7 1006.10   33.60
   1  -1   7 1017.40   34.10
   1  -1   7  946.71   32.30
   1  -1   7  997.40   33.60
  -2   1  -7  466.45   26.30
   2  -1   7  419.86   25.90
   2  -1   7  516.45   27.50
   2  -1   7  480.15   27.50
  -3   1  -7   29.40   16.70
   3  -1   7   -0.20   17.40
   3  -1   7   39.20   16.40
   3  -1   7   20.80   17.30
  -4   1  -7  975.60   35.00
  -4   1  -7  974.80   36.60
   4  -1   7  928.31   36.20
   4  -1   7  899.61   35.00
  -5   1  -7   30.00   16.90
  -5   1  -7   33.80   18.30
   5  -1   7   19.90   19.60
  -6   1  -7  222.98   21.90
  -6   1  -7  182.68   20.50
   6  -1   7  207.38   22.40
  -7   1  -7   15.70   18.00
  -7   1  -7   45.90   19.50
   7  -1   7   29.50   20.50
  -8   1  -7   34.90   19.10
  -8   1  -7   -2.80   19.70
   8  -1   7   40.60   22.70
  -9   1  -7   52.09   22.10
  -9   1  -7   -0.40   20.50
   9  -1   7   -4.80   25.00
 -10   1  -7  358.86   29.30
 -10   1  -7  381.26   30.20
  10  -1   7  491.95   33.00
 -11   1  -7   43.60   26.20
  11  -1   7   32.60   28.10
 -12   1  -7   80.19   28.60
  12  -1   7   72.59   30.70
 -13   1  -7   28.00   29.40
  13  -1   7    9.50   32.00
 -14   1  -7    5.60   31.10
  14  -1   7   97.69   33.40
 -15   1  -7    5.10   31.70
  15  -1   7   42.10   33.90
 -16   1  -7  -17.60   32.90
 -20   0   7   12.90   26.10
 -20   0   7   32.60   25.40
 -19   0   7   -3.90   25.10
 -19   0   7   50.89   24.40
 -18   0   7   -2.50   23.60
 -18   0   7   -1.20   22.80
 -17   0   7   74.89   23.20
 -17   0   7   54.39   23.60
 -16   0   7    4.10   20.60
 -16   0   7   12.30   21.60
 -15   0   7   22.20   19.50
 -15   0   7   32.80   20.30
  14   0  -7  -36.50   18.70
 -14   0   7    7.60   18.60
 -14   0   7   -8.40   17.90
  13   0  -7   11.40   18.30
 -13   0   7   22.20   17.60
 -13   0   7    2.90   17.30
 -13   0   7  -10.40   16.00
  12   0  -7  -15.80   16.30
 -12   0   7   -3.10   15.90
 -12   0   7   21.10   16.30
  11   0  -7 1015.30   36.60
 -11   0   7 1081.89   37.10
 -11   0   7 1046.90   34.70
 -11   0   7 1075.69   37.20
  10   0  -7   17.20   15.30
 -10   0   7    6.30   15.00
 -10   0   7   22.00   15.00
 -10   0   7    6.70   12.30
   9   0  -7  969.70   34.80
  -9   0   7 1013.80   34.60
  -9   0   7 1012.50   34.70
  -9   0   7  975.60   33.50
   8   0  -7   22.20   19.20
   8   0  -7    2.00   14.60
  -8   0   7   -6.70   14.80
  -8   0   7   -1.90   14.90
  -8   0   7   24.50   13.60
   7   0  -7   34.50   14.80
   7   0  -7   26.10   19.60
  -7   0   7   26.70   13.70
  -7   0   7   22.30   15.60
  -7   0   7    5.50   14.70
   6   0  -7   -2.60   18.40
   6   0  -7   25.50   13.60
  -6   0   7   11.30   14.20
  -6   0   7   27.90   15.00
  -6   0   7   -6.80   13.60
   5   0  -7  877.71   34.40
   5   0  -7  905.11   30.60
  -5   0   7  858.81   31.90
  -5   0   7  931.11   31.10
  -5   0   7  927.61   31.10
   4   0  -7    4.90   13.00
   4   0  -7   26.00   16.10
  -4   0   7   -4.60   14.00
  -4   0   7  -11.80   13.00
  -4   0   7    3.40   14.10
   3   0  -7  147.79   14.80
  -3   0   7  121.19   15.80
  -3   0   7  125.39   15.60
  -3   0   7  161.38   16.70
   2   0  -7  -11.40   22.70
   2   0  -7    6.60   13.60
  -2   0   7   16.80   13.50
  -2   0   7  -23.70   14.50
  -2   0   7    8.20   14.30
   1   0  -7  216.48   16.40
   1   0  -7  262.07   18.50
  -1   0   7  223.18   17.90
  -1   0   7  169.58   15.90
  -1   0   7  191.28   16.30
   0   0  -7   15.40   15.60
   0   0  -7  -15.80   13.10
   0   0   7  -10.20   15.00
   0   0   7   -3.70   14.30
   0   0   7    8.00   14.80
  -1   0  -7 1114.69   37.40
  -1   0  -7 1078.19   36.00
   1   0   7 1089.59   43.90
   1   0   7 1165.68   36.70
   1   0   7 1114.09   36.90
  -2   0  -7   13.10   17.60
  -2   0  -7    9.40   14.90
   2   0   7   29.00   17.10
   2   0   7   11.30   15.90
  -3   0  -7  888.91   35.20
  -3   0  -7  846.02   33.40
   3   0   7  856.71   34.60
   3   0   7  800.42   34.10
  -4   0  -7   -3.70   16.90
  -4   0  -7  -16.50   19.00
   4   0   7  -17.90   18.00
   4   0   7   16.60   19.00
  -5   0  -7 1864.41   54.79
  -5   0  -7 1892.61   53.99
   5   0   7 1836.22   54.39
  -6   0  -7   47.50   18.00
  -6   0  -7   28.60   19.70
   6   0   7   15.00   18.60
  -7   0  -7 1499.95   48.50
  -7   0  -7 1509.15   47.80
   7   0   7 1465.65   48.40
  -8   0  -7  -23.10   19.90
  -8   0  -7  -30.20   18.70
   8   0   7  -28.70   22.50
  -9   0  -7   78.99   22.00
  -9   0  -7   97.39   23.00
   9   0   7   98.49   24.90
 -10   0  -7   -1.60   21.90
 -10   0  -7   32.60   23.60
  10   0   7  -27.90   24.20
 -11   0  -7  124.49   25.70
 -11   0  -7  192.78   27.10
  11   0   7  261.77   31.00
 -12   0  -7   -1.00   26.50
 -12   0  -7    4.30   24.50
  12   0   7    5.10   29.70
 -13   0  -7   16.80   26.60
 -13   0  -7  -84.89   27.10
  13   0   7  -16.10   29.60
 -14   0  -7    0.10   30.90
  14   0   7   15.90   46.10
 -15   0  -7   11.10   31.40
 -16   0  -7  -13.10   33.50
 -17   0  -7   -5.90   33.20
 -20   1   7  108.49   30.50
 -19   1   7   -7.70   24.40
 -19   1   7  -21.20   26.90
 -18   1   7   80.39   27.00
 -18   1   7  106.99   25.90
 -17   1   7  185.38   28.00
 -17   1   7  224.18   27.80
 -16   1   7   61.09   24.40
 -16   1   7  101.29   23.10
  15  -1  -7  154.78   26.70
 -15   1   7  176.08   24.60
 -15   1   7  204.08   25.80
  14  -1  -7  552.34   36.90
 -14   1   7  559.34   35.80
 -14   1   7  518.85   37.00
  13  -1  -7   18.90   20.40
 -13   1   7  -15.60   19.20
 -13   1   7   13.30   18.90
  12  -1  -7   71.09   19.60
 -12   1   7   20.70   18.40
 -12   1   7   25.40   18.00
  11  -1  -7   50.19   18.10
 -11   1   7   34.60   17.60
 -11   1   7   28.30   17.60
  10  -1  -7  126.29   19.60
 -10   1   7  121.49   18.90
 -10   1   7  109.19   18.30
   9  -1  -7  227.08   24.30
   9  -1  -7  198.18   20.70
  -9   1   7  232.18   20.20
  -9   1   7  238.18   20.60
   8  -1  -7  -12.90   19.80
   8  -1  -7   23.40   16.90
  -8   1   7    7.70   16.20
  -8   1   7   15.20   16.30
   7  -1  -7   57.09   20.10
   7  -1  -7   80.29   18.20
  -7   1   7   60.99   17.90
  -7   1   7   82.79   18.20
   6  -1  -7  175.38   22.10
   6  -1  -7  168.38   18.80
  -6   1   7  200.98   19.60
  -6   1   7  172.68   18.40
   5  -1  -7  560.94   30.90
   5  -1  -7  530.35   28.20
  -5   1   7  574.34   28.60
  -5   1   7  584.24   29.10
   4  -1  -7  755.52   31.60
  -4   1   7  773.52   31.50
  -4   1   7  788.62   31.40
   3  -1  -7  381.66   26.00
   3  -1  -7  377.16   26.50
  -3   1   7  361.86   25.40
  -3   1   7  351.46   26.60
   2  -1  -7  235.98   18.70
   2  -1  -7  284.17   19.60
  -2   1   7  241.38   19.20
  -2   1   7  217.28   18.70
   1  -1  -7   15.50   17.20
   1  -1  -7   33.10   15.80
  -1   1   7   27.50   17.40
  -1   1   7   24.40   16.00
   0  -1  -7 1036.80   37.90
   0  -1  -7 1043.80   35.60
   0   1   7  999.80   34.60
   0   1   7 1006.70   36.40
  -1  -1  -7 1067.79   37.40
  -1  -1  -7 1048.40   38.70
   1   1   7 1057.49   37.00
   1   1   7 1101.79   38.00
  -2  -1  -7  447.96   28.00
  -2  -1  -7  455.85   30.80
   2   1   7  491.55   29.50
   2   1   7  458.95   28.80
  -3  -1  -7   18.00   19.80
  -3  -1  -7   25.60   17.30
   3   1   7   37.80   17.90
   3   1   7   26.90   17.20
  -4  -1  -7  994.60   39.50
  -4  -1  -7 1002.20   37.10
   4   1   7  918.91   36.90
   4   1   7  909.01   37.50
  -5  -1  -7    3.20   22.00
  -5  -1  -7  -31.50   19.80
  -5  -1  -7   32.70   17.60
   5   1   7   -3.00   18.30
   5   1   7   25.20   18.90
  -6  -1  -7  204.68   20.70
  -6  -1  -7  204.38   21.10
  -6  -1  -7  226.08   22.90
   6   1   7  199.88   22.20
  -7  -1  -7   10.50   20.70
  -7  -1  -7   31.90   18.00
  -7  -1  -7    4.30   18.60
   7   1   7   15.30   19.80
  -8  -1  -7   43.20   19.20
  -8  -1  -7   14.00   21.50
  -8  -1  -7   53.39   20.10
   8   1   7   60.59   20.70
  -9  -1  -7    6.80   21.10
  -9  -1  -7   18.10   20.70
  -9  -1  -7   39.70   23.40
   9   1   7   45.80   22.30
 -10  -1  -7  356.96   30.10
 -10  -1  -7  364.46   28.50
  10   1   7  337.67   28.70
 -11  -1  -7   24.40   25.40
 -11  -1  -7   72.49   24.80
  11   1   7   67.39   28.20
 -12  -1  -7   56.09   26.00
 -12  -1  -7   74.89   27.20
 -13  -1  -7   33.80   27.20
 -13  -1  -7  -19.10   27.20
 -14  -1  -7   24.90   29.50
 -14  -1  -7   32.80   28.90
 -15  -1  -7   29.30   28.60
 -15  -1  -7   11.00   30.80
 -16  -1  -7   -6.00   31.80
 -19   2   7   -0.50   31.30
 -18   2   7    4.60   30.30
 -17   2   7   62.39   29.40
  16  -2  -7  298.77   34.50
 -16   2   7  369.16   34.20
  15  -2  -7  -24.70   27.10
 -15   2   7   -8.50   24.80
 -15   2   7    8.30   22.70
  14  -2  -7   71.29   27.10
 -14   2   7  111.19   23.70
 -14   2   7  147.49   27.70
  13  -2  -7  122.19   27.00
 -13   2   7  133.49   25.30
 -13   2   7  164.88   24.40
  12  -2  -7   98.89   24.80
 -12   2   7   23.80   20.10
 -12   2   7   54.99   22.20
  11  -2  -7  149.99   25.50
  11  -2  -7  139.99   23.90
 -11   2   7  101.09   21.70
 -11   2   7   75.19   19.20
  10  -2  -7  855.21   40.60
  10  -2  -7  916.41   42.20
 -10   2   7  839.82   36.50
 -10   2   7  863.01   39.30
   9  -2  -7  400.86   26.90
   9  -2  -7  406.36   29.20
  -9   2   7  402.06   30.60
  -9   2   7  398.96   29.40
   8  -2  -7  266.77   25.20
   8  -2  -7  250.97   23.50
  -8   2   7  250.67   21.40
  -8   2   7  260.37   22.40
   7  -2  -7  767.12   35.70
   7  -2  -7  864.11   38.20
  -7   2   7  782.62   33.00
  -7   2   7  812.72   35.00
   6  -2  -7  698.23   33.70
   6  -2  -7  733.63   35.00
  -6   2   7  752.32   33.30
  -6   2   7  726.33   33.40
   5  -2  -7 1628.44   49.80
   5  -2  -7 1635.94   49.70
  -5   2   7 1520.15   48.20
  -5   2   7 1524.65   48.00
   4  -2  -7  191.58   21.00
  -4   2   7  192.08   19.60
  -4   2   7  176.48   19.90
   3  -2  -7   26.70   18.00
  -3   2   7   43.80   18.00
  -3   2   7   17.10   18.30
   2  -2  -7   -9.60   17.00
   2  -2  -7  -30.70   19.60
   2  -2  -7    4.70   17.20
  -2   2   7    8.90   18.40
  -2   2   7    0.40   17.30
   1  -2  -7 1521.15   47.60
   1  -2  -7 1506.35   46.10
   1  -2  -7 1552.04   49.10
  -1   2   7 1551.64   46.20
  -1   2   7 1608.64   47.60
   0  -2  -7   20.50   19.80
   0  -2  -7   11.90   17.40
   0  -2  -7   21.00   18.10
   0   2   7    3.20   29.50
   0   2   7   34.60   18.70
  -1  -2  -7  357.76   26.80
  -1  -2  -7  352.26   27.40
  -1  -2  -7  422.56   26.30
   1   2   7  361.96   29.20
  -2  -2  -7  -19.60   19.60
  -2  -2  -7   26.50   16.80
  -2  -2  -7   23.50   17.30
   2   2   7    5.20   18.50
  -3  -2  -7   11.20   16.90
  -3  -2  -7    4.50   20.30
  -3  -2  -7   50.69   17.60
   3   2   7   17.50   17.90
  -4  -2  -7   91.39   17.60
  -4  -2  -7   54.19   21.30
  -4  -2  -7   98.19   18.60
   4   2   7   70.19   18.70
  -5  -2  -7  116.39   18.60
  -5  -2  -7   58.89   21.10
  -5  -2  -7   78.19   19.00
   5   2   7   94.79   20.20
  -6  -2  -7  127.09   20.90
  -6  -2  -7  182.98   23.40
  -6  -2  -7  197.08   20.20
   6   2   7  187.88   22.30
  -7  -2  -7  122.19   23.80
  -7  -2  -7   81.39   20.30
  -7  -2  -7   19.80   18.40
   7   2   7   75.19   21.40
  -8  -2  -7   -4.80   18.70
  -8  -2  -7   -9.70   23.50
  -8  -2  -7   -5.30   20.20
   8   2   7  -18.80   21.90
  -9  -2  -7   47.70   22.00
  -9  -2  -7   89.39   23.40
  -9  -2  -7   -0.90   24.90
   9   2   7    0.00   22.60
 -10  -2  -7   18.30   22.30
 -10  -2  -7  -12.30   25.50
 -11  -2  -7   20.00   26.90
 -11  -2  -7   30.60   24.90
 -12  -2  -7   95.09   26.20
 -12  -2  -7  127.79   29.70
 -13  -2  -7   31.60   27.00
 -13  -2  -7   36.90   29.20
 -14  -2  -7  178.68   31.40
 -14  -2  -7  161.28   31.80
 -15  -2  -7   22.10   30.20
 -15  -2  -7   27.80   30.30
 -16  -2  -7   24.10   31.90
 -16  -2  -7   27.30   32.00
  18  -3  -7   70.09   45.40
 -18   3   7   80.19   35.00
  17  -3  -7  188.18   39.20
 -17   3   7   69.29   34.30
  16  -3  -7   65.59   36.00
 -16   3   7   11.70   30.40
  15  -3  -7  245.48   37.30
  15  -3  -7  289.47   35.30
 -15   3   7  239.48   34.20
  14  -3  -7   -4.70   29.00
  14  -3  -7  -20.20   31.50
 -14   3   7   -3.90   29.50
  13  -3  -7  405.86   37.80
  13  -3  -7  432.36   36.30
 -13   3   7  406.56   35.20
  12  -3  -7   36.70   28.10
  12  -3  -7   13.10   27.70
 -12   3   7   25.90   25.60
  11  -3  -7   18.40   26.30
  11  -3  -7   -1.40   26.00
 -11   3   7   42.10   24.70
  10  -3  -7   93.99   26.70
  10  -3  -7   66.79   24.80
 -10   3   7   81.09   20.50
 -10   3   7   22.40   23.00
   9  -3  -7   78.99   24.70
   9  -3  -7   98.29   25.10
  -9   3   7  126.59   23.30
  -9   3   7   60.39   18.90
   8  -3  -7  806.02   39.60
   8  -3  -7  735.93   42.10
  -8   3   7  792.12   35.60
  -8   3   7  776.72   38.50
   7  -3  -7   20.70   20.80
   7  -3  -7  -15.70   19.40
  -7   3   7    3.70   17.60
  -7   3   7    7.00   19.70
   6  -3  -7  427.46   34.10
  -6   3   7  362.26   27.70
  -6   3   7  376.96   29.80
   5  -3  -7  -46.00   18.90
   5  -3  -7   15.70   18.60
  -5   3   7   14.80   18.20
   4  -3  -7  213.38   21.90
   4  -3  -7  168.48   22.20
  -4   3   7  186.58   20.40
   3  -3  -7   22.20   19.50
   3  -3  -7    7.80   17.90
  -3   3   7   41.90   18.70
   2  -3  -7  258.57   23.00
   2  -3  -7  307.87   22.90
  -2   3   7  272.67   23.00
   1  -3  -7  343.27   26.30
   1  -3  -7  321.07   24.60
   1  -3  -7  344.27   27.40
  -1   3   7  344.77   27.10
   0  -3  -7   33.90   18.00
   0  -3  -7   66.09   19.30
   0  -3  -7   43.40   21.10
   0   3   7   56.49   18.50
  -1  -3  -7   34.40   20.60
  -1  -3  -7   59.09   21.60
  -1  -3  -7   29.10   18.90
  -1  -3  -7   27.90   18.80
   1   3   7   25.40   18.30
  -2  -3  -7  245.98   22.10
  -2  -3  -7  234.78   22.00
  -2  -3  -7  231.18   24.70
  -2  -3  -7  215.98   21.80
   2   3   7  215.68   21.80
  -3  -3  -7    3.00   19.30
  -3  -3  -7   -2.60   18.40
  -3  -3  -7  -22.30   21.50
  -3  -3  -7   35.50   19.30
   3   3   7   33.10   19.00
  -4  -3  -7  -16.90   18.30
  -4  -3  -7   -3.70   23.10
  -4  -3  -7   27.60   19.00
  -4  -3  -7   31.00   20.50
   4   3   7   10.50   18.50
  -5  -3  -7  121.19   20.80
  -5  -3  -7  119.39   21.40
  -5  -3  -7  129.79   22.40
  -5  -3  -7   71.79   24.40
   5   3   7  160.98   22.10
  -6  -3  -7   49.50   25.70
  -6  -3  -7   24.50   20.10
  -6  -3  -7   34.90   20.00
  -6  -3  -7   11.40   22.90
   6   3   7   35.00   26.60
  -7  -3  -7   12.50   20.90
  -7  -3  -7   57.09   25.40
  -7  -3  -7   20.70   20.90
  -8  -3  -7   58.49   21.60
  -8  -3  -7   65.69   26.30
  -8  -3  -7   81.19   22.60
  -9  -3  -7   14.20   22.50
  -9  -3  -7   31.80   27.50
 -10  -3  -7   21.00   27.60
 -10  -3  -7   37.10   22.60
 -11  -3  -7   91.99   29.20
 -11  -3  -7   10.40   25.00
 -12  -3  -7   14.30   24.70
 -12  -3  -7  -11.60   28.90
 -13  -3  -7   53.89   31.60
 -13  -3  -7   15.50   26.50
 -14  -3  -7  -56.89   29.50
 -14  -3  -7   24.10   28.20
 -15  -3  -7   46.20   29.50
 -15  -3  -7   43.50   32.50
  16  -4  -7  220.38   42.60
  16  -4  -7  261.67   39.40
  15  -4  -7  -32.10   36.60
  15  -4  -7   88.29   34.20
 -15   4   7   66.49   36.90
  14  -4  -7   67.19   32.10
  14  -4  -7   93.29   36.40
 -14   4   7   41.60   32.50
  13  -4  -7   33.50   30.50
  13  -4  -7   24.50   35.00
 -13   4   7   25.60   30.90
  12  -4  -7   67.39   34.10
  12  -4  -7   69.19   30.30
 -12   4   7   46.60   30.60
  11  -4  -7   63.49   28.70
  11  -4  -7  -15.30   30.90
 -11   4   7   47.90   27.70
  10  -4  -7  418.56   32.50
  10  -4  -7  422.46   38.30
 -10   4   7  360.96   33.70
   9  -4  -7   87.69   25.00
   9  -4  -7  110.39   29.10
  -9   4   7   62.09   26.40
   8  -4  -7   42.10   23.80
   8  -4  -7   -3.70   27.20
  -8   4   7    1.40   23.50
   7  -4  -7  115.49   28.00
  -7   4   7   66.69   24.20
   6  -4  -7  203.28   27.70
  -6   4   7  183.78   24.90
   5  -4  -7  -18.50   23.20
   5  -4  -7   -5.40   23.20
  -5   4   7  -38.20   20.20
   4  -4  -7  269.57   26.30
   4  -4  -7  277.27   28.10
  -4   4   7  324.27   25.70
   3  -4  -7  -42.30   20.90
   3  -4  -7    2.60   22.40
  -3   4   7   -3.50   20.90
   2  -4  -7  130.89   24.00
   2  -4  -7  105.49   22.50
  -2   4   7  137.79   22.20
   1  -4  -7   76.49   26.10
   1  -4  -7  118.09   22.70
   1  -4  -7   61.89   23.30
  -1   4   7   93.39   20.60
   0  -4  -7  104.59   26.30
   0  -4  -7   70.69   21.90
   0  -4  -7  112.99   22.10
   0  -4  -7  100.29   24.60
   0   4   7  104.39   33.10
  -1  -4  -7   30.70   21.40
  -1  -4  -7   47.30   25.70
  -1  -4  -7   31.50   21.60
  -1  -4  -7   12.60   26.10
  -2  -4  -7   18.50   20.90
  -2  -4  -7    1.10   21.60
  -2  -4  -7   11.80   25.40
  -3  -4  -7   60.39   24.20
  -3  -4  -7   34.00   26.40
  -3  -4  -7   -5.50   21.00
  -4  -4  -7   84.09   22.20
  -4  -4  -7   16.50   26.30
  -4  -4  -7   86.49   24.70
  -5  -4  -7   36.30   21.40
  -5  -4  -7   64.29   25.00
  -5  -4  -7   21.00   27.60
  -6  -4  -7   65.69   25.10
  -6  -4  -7  -22.10   26.90
  -6  -4  -7   10.50   21.10
  -7  -4  -7  356.36   40.80
  -7  -4  -7  294.27   26.60
  -7  -4  -7  360.66   33.80
  -8  -4  -7  -11.30   22.00
  -8  -4  -7   34.10   27.90
  -9  -4  -7   28.60   28.90
  -9  -4  -7   50.09   23.10
 -10  -4  -7   14.30   22.60
 -10  -4  -7   37.10   29.60
 -11  -4  -7  156.18   26.90
 -11  -4  -7  223.78   33.20
 -12  -4  -7  -16.80   30.20
 -12  -4  -7  -15.40   24.90
 -13  -4  -7   22.80   26.90
 -13  -4  -7   39.20   31.30
  14  -5  -7   31.40   32.60
  14  -5  -7   48.80   40.80
  13  -5  -7   -1.60   39.70
  13  -5  -7   50.79   31.00
  12  -5  -7   91.69   37.70
  12  -5  -7  107.49   30.80
  11  -5  -7   20.80   28.60
  11  -5  -7   -8.40   33.60
  10  -5  -7    2.00   33.10
   9  -5  -7   68.99   33.40
   8  -5  -7   56.49   31.10
   7  -5  -7   12.30   29.40
   6  -5  -7   25.80   28.60
   5  -5  -7   18.20   27.00
   4  -5  -7  105.59   28.00
   3  -5  -7   -3.40   25.20
   2  -5  -7  180.28   27.90
   1  -5  -7   18.00   24.70
   0  -5  -7    8.60   23.40
   0  -5  -7   -5.70   29.70
  -1  -5  -7   -3.20   22.70
  -1  -5  -7   72.39   31.70
  -2  -5  -7  238.28   26.50
  -2  -5  -7  231.68   32.10
  -3  -5  -7   84.89   23.70
  -3  -5  -7   96.19   30.40
  -4  -5  -7   63.59   31.40
  -4  -5  -7   44.10   22.90
  -5  -5  -7   22.50   30.20
  -5  -5  -7   42.80   23.20
  -6  -5  -7  225.08   25.50
  -6  -5  -7  179.98   33.40
  -7  -5  -7  -28.70   30.50
  -7  -5  -7   22.70   22.40
  -8  -5  -7    8.70   22.10
  -8  -5  -7   65.89   31.20
  -9  -5  -7  -10.00   23.20
  -9  -5  -7   11.50   30.50
 -10  -5  -7   39.30   23.20
 -10  -5  -7    3.20   31.20
   9  -6  -7  105.29   35.80
   8  -6  -7  -10.20   32.90
   7  -6  -7   17.70   31.60
   6  -6  -7   12.50   30.40
   5  -6  -7  101.79   30.70
   4  -6  -7  -10.40   27.70
   3  -6  -7   -1.70   27.60
   2  -6  -7  -25.70   25.50
   1  -6  -7   16.60   36.00
   1  -6  -7   52.99   26.00
   0  -6  -7   91.69   35.90
   0  -6  -7   70.89   26.00
  -1  -6  -7    7.60   24.00
  -1  -6  -7   32.20   35.40
  -2  -6  -7   89.49   25.70
  -2  -6  -7   97.59   34.80
  -3  -6  -7   20.00   24.40
  -3  -6  -7   18.20   33.40
  -4  -6  -7  -27.00   23.20
  -4  -6  -7  -12.40   33.30
  -5  -6  -7   27.30   32.80
  -5  -6  -7   42.60   23.20
  -3  -6   8   15.20   21.30
  -2  -6   8   -4.00   23.20
  -1  -6   8    2.20   25.00
   0  -6   8   28.50   26.60
   1  -6   8  -18.10   28.30
   2  -6   8   56.09   21.70
   3  -6   8   20.00   22.90
   4  -6   8  216.88   27.90
  -3  -5   8   -7.70   17.30
  -2  -5   8   24.00   19.60
  -1  -5   8   19.20   20.90
   0  -5   8   74.59   23.70
   1  -5   8   94.49   25.10
   1  -5   8  137.19   20.30
   1  -5   8   85.39   16.10
   2  -5   8  111.49   22.70
   2  -5   8   90.59   25.90
   3  -5   8   30.60   26.20
   3  -5   8   29.10   22.60
   4  -5   8   33.40   24.10
   5  -5   8   -9.80   24.90
   6  -5   8    6.50   27.00
   7  -5   8   12.70   28.50
   8  -5   8   46.70   30.70
   9  -5   8   94.49   33.40
 -16  -4   8   -0.10   15.90
 -15  -4   8    0.80   14.70
 -14  -4   8   12.20   13.60
  12   4  -8    1.50   22.70
  -3  -4   8    5.90   14.00
  -2  -4   8  245.78   18.50
  -1  -4   8   14.40   16.50
   0  -4   8  118.09   19.70
   0  -4   8  152.48   17.60
   0  -4   8  107.39   15.20
   1  -4   8    0.70   17.30
   1  -4   8   -0.30   13.80
   1  -4   8   19.90   19.00
   2  -4   8   69.79   16.60
   2  -4   8   74.39   20.60
   2  -4   8   91.89   21.50
   3  -4   8   -1.90   21.20
   3  -4   8   -1.70   16.00
   3  -4   8  -18.30   21.20
   4  -4   8  115.09   24.80
   4  -4   8  113.09   23.70
   5  -4   8   31.00   24.20
   5  -4   8   -0.70   26.60
   6  -4   8   34.50   25.80
   7  -4   8   32.90   27.50
   8  -4   8   95.69   30.10
   9  -4   8   -1.90   30.10
  10  -4   8    1.50   31.30
  11  -4   8   27.90   34.00
  12  -4   8  -18.80   34.30
 -18  -3   8   -4.00   19.30
 -17  -3   8    8.50   18.50
 -16  -3   8   25.70   17.30
 -15  -3   8   22.00   16.00
 -14  -3   8  103.69   16.30
 -13  -3   8   -6.70   13.40
 -12  -3   8    7.70   12.30
 -11  -3   8   13.20   11.50
  10   3  -8   33.60   20.80
   9   3  -8   13.50   19.40
   8   3  -8   35.90   17.70
  -3  -3   8  121.39   11.60
  -3  -3   8  132.59   13.50
  -2  -3   8  443.66   22.00
  -2  -3   8  426.16   20.90
  -2  -3   8  462.55   18.80
  -1  -3   8  101.09   15.40
  -1  -3   8  103.79   12.60
   0  -3   8  103.99   16.60
   0  -3   8  118.89   13.80
   1  -3   8  137.19   14.80
   1  -3   8  172.28   18.70
   1  -3   8  157.58   18.00
   2  -3   8  402.96   27.90
   2  -3   8  381.56   23.40
   2  -3   8  421.76   29.00
  -3   3  -8   36.50   16.50
   3  -3   8   20.50   19.10
   3  -3   8   53.19   15.00
   3  -3   8   24.60   19.00
  -4   3  -8    7.00   17.30
   4  -3   8   14.10   20.00
   4  -3   8  -16.40   19.70
   4  -3   8   18.10   15.50
  -5   3  -8   54.39   19.60
   5  -3   8   27.40   21.20
   5  -3   8   45.00   22.50
  -6   3  -8  257.97   28.30
   6  -3   8  263.77   26.00
  11  -3   8   36.50   31.50
  12  -3   8   14.80   33.80
  13  -3   8   94.49   36.70
  14  -3   8   15.80   36.40
 -19  -2   8   80.69   22.80
 -19  -2   8   12.30   19.20
 -18  -2   8   22.50   20.50
 -18  -2   8    1.00   18.20
 -17  -2   8   78.49   20.60
 -17  -2   8   97.59   18.40
 -16  -2   8    3.10   16.00
 -16  -2   8    8.10   18.00
 -15  -2   8    2.20   15.40
 -15  -2   8   -5.80   13.60
 -15  -2   8   24.40   17.10
 -14  -2   8   88.79   15.50
 -14  -2   8   88.69   17.30
 -14  -2   8   65.59   14.50
 -13  -2   8   40.70   15.80
 -13  -2   8   28.20   13.90
 -13  -2   8   77.79   13.50
 -12  -2   8  100.29   13.80
 -12  -2   8   98.59   15.60
 -12  -2   8  113.19   12.60
 -11  -2   8   48.30   10.90
 -11  -2   8   60.89   13.70
 -11  -2   8   51.29   11.90
 -10  -2   8   37.50    9.80
 -10  -2   8   31.70   11.40
 -10  -2   8   42.40   12.80
   9   2  -8   37.60   19.10
  -9  -2   8    2.80   11.40
   8   2  -8    9.20   18.10
  -8  -2   8    6.90   10.90
   7   2  -8  136.99   19.10
  -7  -2   8  123.49   12.30
   6   2  -8  287.97   24.20
  -6  -2   8  247.18   17.50
  -6  -2   8  250.87   18.30
  -5  -2   8  356.96   19.70
  -5  -2   8  378.46   19.50
  -4  -2   8  232.18   15.00
  -4  -2   8  214.18   16.00
  -4  -2   8  249.48   14.90
  -3  -2   8   31.10   11.90
  -3  -2   8  -18.70   11.20
  -3  -2   8   24.40   11.10
  -3  -2   8   15.40   11.80
  -2  -2   8  704.53   26.60
  -2  -2   8  772.42   26.00
  -2  -2   8  770.12   25.70
  -2  -2   8  704.13   26.50
  -1  -2   8  923.41   29.30
  -1  -2   8  902.11   30.50
  -1  -2   8  913.71   30.60
  -1  -2   8  903.81   31.10
   0  -2   8   66.89   15.30
   0  -2   8  125.29   14.40
   0  -2   8  119.79   15.60
   0  -2   8  112.29   15.70
  -1   2  -8  729.93   28.60
   1  -2   8  743.83   29.40
   1  -2   8  737.83   30.20
   1  -2   8  654.13   29.20
   1  -2   8  719.63   27.90
  -2   2  -8   90.19   15.70
   2  -2   8   84.29   17.00
   2  -2   8   88.79   16.90
   2  -2   8   95.49   14.40
  -3   2  -8    3.30   15.70
   3  -2   8   32.40   16.80
   3  -2   8   36.10   13.80
   3  -2   8   48.30   16.80
  -4   2  -8   76.29   17.30
   4  -2   8   74.09   18.90
   4  -2   8   87.09   18.00
  -5   2  -8    7.00   16.20
   5  -2   8   25.80   19.80
   5  -2   8   -9.70   17.60
  -6   2  -8   28.10   18.00
   6  -2   8   70.29   21.00
   6  -2   8    6.60   19.00
  -7   2  -8  185.78   23.10
   7  -2   8  263.07   26.10
   7  -2   8  255.07   27.30
  -8   2  -8   21.90   22.00
   8  -2   8   14.20   25.10
  -9   2  -8    5.60   24.00
   9  -2   8  -21.10   26.60
 -10   2  -8   47.70   26.70
  10  -2   8  103.09   29.90
 -11   2  -8   31.30   28.00
  11  -2   8   13.70   29.90
 -12   2  -8  245.88   34.00
  12  -2   8  286.07   36.40
 -13   2  -8   14.40   30.60
  13  -2   8  108.99   35.10
 -14   2  -8   -0.40   31.50
 -15   2  -8   71.59   35.80
 -20  -1   8   -3.30   24.90
 -20  -1   8  -16.90   20.80
 -19  -1   8   41.20   21.10
 -19  -1   8    7.80   23.80
 -18  -1   8    9.90   19.90
 -18  -1   8    1.20   22.20
 -17  -1   8   31.50   21.30
 -17  -1   8  -19.40   18.40
 -16  -1   8   20.00   20.80
 -16  -1   8  -13.90   17.60
 -15  -1   8   20.70   17.40
 -15  -1   8   25.80   19.20
 -14  -1   8   41.50   18.00
 -14  -1   8   51.59   14.60
 -14  -1   8   38.40   16.90
 -13  -1   8  119.99   16.70
 -13  -1   8  122.89   18.10
 -13  -1   8  104.69   16.80
 -12  -1   8   -0.20   14.90
 -12  -1   8   29.00   14.30
 -12  -1   8   -5.20   13.50
 -11  -1   8   -3.00   14.20
 -11  -1   8    7.10   13.60
 -10  -1   8  347.17   22.10
 -10  -1   8  387.46   23.10
 -10  -1   8  370.06   20.30
   9   1  -8  347.27   25.20
  -9  -1   8  277.57   21.50
  -9  -1   8  292.67   21.10
  -9  -1   8  326.67   19.50
   8   1  -8   90.69   20.90
  -8  -1   8  132.89   14.30
  -8  -1   8  118.49   13.40
  -8  -1   8  135.69   15.00
   7   1  -8 1119.29   40.90
  -7  -1   8 1088.19   34.30
  -7  -1   8 1123.99   34.90
  -7  -1   8 1135.59   33.50
   6   1  -8  433.26   29.30
  -6  -1   8  491.95   23.80
  -6  -1   8  475.65   23.50
  -6  -1   8  479.85   22.70
   5   1  -8  389.86   27.90
  -5  -1   8  359.06   23.30
  -5  -1   8  358.06   23.20
  -5  -1   8  392.66   23.00
  -5  -1   8  409.36   22.60
  -4  -1   8  198.68   16.90
  -4  -1   8  249.78   16.90
  -4  -1   8  186.68   16.20
  -4  -1   8  223.48   16.40
  -3  -1   8   81.19   14.90
  -3  -1   8   72.59   14.10
  -3  -1   8   51.59   14.00
  -3  -1   8   64.69   14.10
   2   1  -8   14.70   12.90
  -2  -1   8   -8.90   13.80
  -2  -1   8   -8.80   14.30
  -2  -1   8    0.80   14.10
  -2  -1   8   14.30   13.20
   1   1  -8  183.88   14.90
  -1  -1   8  131.99   16.00
  -1  -1   8  117.29   16.10
  -1  -1   8  147.19   17.40
  -1  -1   8  121.59   14.40
   0   1  -8   39.90   14.60
   0  -1   8   18.30   15.30
   0  -1   8   47.60   13.90
   0  -1   8   48.50   14.60
   0  -1   8   51.79   16.40
  -1   1  -8  778.92   31.00
   1  -1   8  805.92   32.20
   1  -1   8  815.42   33.00
   1  -1   8  857.31   32.10
  -2   1  -8  102.29   17.50
   2  -1   8   91.99   17.20
   2  -1   8   77.19   18.00
   2  -1   8   85.29   18.00
  -3   1  -8  301.17   20.80
   3  -1   8  233.88   21.00
   3  -1   8  261.57   20.50
   3  -1   8  296.97   22.70
  -4   1  -8   32.50   17.00
  -4   1  -8   23.60   18.00
   4  -1   8   -7.30   17.80
   4  -1   8   -7.60   16.70
  -5   1  -8  383.16   29.00
  -5   1  -8  371.66   29.90
   5  -1   8  442.46   31.50
  -6   1  -8  350.56   24.40
  -6   1  -8  375.66   30.20
   6  -1   8  361.76   26.10
  -7   1  -8  646.54   35.10
  -7   1  -8  600.24   35.30
   7  -1   8  612.94   36.90
  -8   1  -8  253.17   25.10
  -8   1  -8  246.78   24.40
   8  -1   8  262.27   27.70
  -9   1  -8  104.59   23.60
  -9   1  -8   26.80   22.00
   9  -1   8   53.99   26.00
 -10   1  -8  201.88   27.10
  10  -1   8  278.57   32.20
 -11   1  -8   42.90   27.20
  11  -1   8   66.99   29.20
 -12   1  -8   65.39   29.50
  12  -1   8   29.50   30.40
 -13   1  -8  172.78   34.00
  13  -1   8   45.10   33.40
 -14   1  -8   29.70   33.60
  14  -1   8  -50.79   32.90
 -15   1  -8  -45.60   32.80
  15  -1   8    0.30   35.00
 -16   1  -8  -13.60   33.80
 -20   0   8    1.10   25.10
 -20   0   8   26.60   24.90
 -19   0   8    4.90   23.90
 -19   0   8   -5.40   23.30
 -18   0   8  619.44   40.40
 -18   0   8  579.84   39.80
 -17   0   8   35.80   21.70
 -17   0   8    0.40   22.10
 -16   0   8  481.15   36.40
 -16   0   8  574.94   36.00
 -15   0   8   -4.40   19.80
 -15   0   8  -22.30   19.20
 -14   0   8  541.85   34.10
 -14   0   8  586.64   33.10
  13   0  -8   -0.70   17.50
 -13   0   8    9.90   17.20
 -13   0   8   20.90   17.80
  12   0  -8 1370.46   44.90
 -12   0   8 1365.66   42.50
 -12   0   8 1471.45   45.50
 -12   0   8 1434.36   45.90
  11   0  -8   -0.90   15.80
 -11   0   8  -14.40   15.70
 -11   0   8  -11.30   12.20
 -11   0   8   -5.90   15.00
  10   0  -8  807.52   38.10
  10   0  -8  789.32   32.50
 -10   0   8  763.02   32.50
 -10   0   8  761.72   29.80
 -10   0   8  812.22   31.50
   9   0  -8   42.70   20.10
   9   0  -8   15.90   15.40
  -9   0   8   41.40   15.40
  -9   0   8   16.50   15.20
  -9   0   8    0.90   13.50
   8   0  -8  942.71   33.90
   8   0  -8  923.91   40.00
  -8   0   8  919.11   33.40
  -8   0   8  906.91   32.80
  -8   0   8  929.01   34.00
   7   0  -8   -2.70   19.80
   7   0  -8  -18.60   14.10
  -7   0   8   -7.00   15.20
  -7   0   8   -4.60   14.10
  -7   0   8   12.70   15.10
   6   0  -8  571.54   26.60
   6   0  -8  551.04   32.10
  -6   0   8  576.44   27.10
  -6   0   8  581.94   28.60
  -6   0   8  535.55   27.60
   5   0  -8    6.10   17.60
   5   0  -8    4.50   14.70
  -5   0   8    1.00   14.90
  -5   0   8   -0.80   15.50
  -5   0   8    8.90   15.60
   4   0  -8  135.09   16.50
  -4   0   8  129.79   16.80
  -4   0   8  144.39   17.40
  -4   0   8  135.79   20.50
   3   0  -8  -21.40   14.40
  -3   0   8    6.50   14.60
  -3   0   8   15.70   16.50
  -3   0   8   -6.10   15.80
   2   0  -8 1785.12   48.10
  -2   0   8 1732.43   48.10
  -2   0   8 1675.63   48.00
  -2   0   8 1765.52   48.90
   1   0  -8   -1.20   14.70
   1   0  -8    2.10   17.70
  -1   0   8    1.70   14.10
  -1   0   8  -14.70   14.70
  -1   0   8   24.60   16.50
   0   0  -8  315.47   24.60
   0   0  -8  359.26   27.00
   0   0   8  313.17   25.00
   0   0   8  317.87   20.50
   0   0   8  345.27   21.40
  -1   0  -8   33.00   18.50
  -1   0  -8  -14.60   15.80
   1   0   8   21.30   17.20
   1   0   8   10.20   17.50
  -2   0  -8  129.39   20.70
  -2   0  -8  117.99   18.20
   2   0   8  116.49   19.10
   2   0   8  132.99   19.20
  -3   0  -8   21.20   17.10
  -3   0  -8   38.60   19.90
   3   0   8   35.30   18.80
   3   0   8  -12.20   18.00
  -4   0  -8    7.20   20.00
  -4   0  -8   28.50   18.20
   4   0   8   22.20   19.40
   4   0   8  -15.80   18.40
  -5   0  -8    1.10   18.60
  -5   0  -8   42.70   18.30
   5   0   8  -17.70   18.50
   5   0   8    8.50   19.60
  -6   0  -8  930.21   37.70
  -6   0  -8  930.71   38.40
   6   0   8  889.11   38.20
  -7   0  -8  -28.00   20.70
  -7   0  -8  -31.40   18.90
   7   0   8  -21.80   20.00
  -8   0  -8  -37.40   21.50
  -8   0  -8  -27.80   20.60
   8   0   8   14.50   22.00
  -9   0  -8  -15.70   22.40
  -9   0  -8   35.80   22.90
   9   0   8   -0.70   24.70
 -10   0  -8   61.69   24.80
 -10   0  -8   70.59   26.00
  10   0   8  102.29   28.60
 -11   0  -8    6.70   25.00
 -11   0  -8  -41.60   24.80
  11   0   8   42.10   28.20
 -12   0  -8  105.69   29.30
 -12   0  -8  128.19   27.90
  12   0   8   65.99   30.00
 -13   0  -8  -35.90   28.80
  13   0   8    5.10   32.30
 -14   0  -8   35.60   31.40
 -15   0  -8   32.20   34.10
 -16   0  -8  159.08   37.40
 -20   1   8  -58.39   27.60
 -19   1   8   31.50   26.10
 -19   1   8   13.90   27.50
 -18   1   8   27.60   24.00
 -18   1   8   23.70   25.40
 -17   1   8  -11.30   23.30
 -17   1   8  -17.60   24.40
 -16   1   8  -15.20   21.90
 -16   1   8   22.30   23.50
  15  -1  -8   25.20   23.40
 -15   1   8    4.60   21.10
 -15   1   8   54.59   23.10
  14  -1  -8   70.79   23.10
 -14   1   8    3.40   21.00
 -14   1   8   51.69   21.40
  13  -1  -8   88.09   22.10
 -13   1   8   97.49   21.60
 -13   1   8  113.49   21.60
  12  -1  -8    1.20   19.60
 -12   1   8   22.70   18.40
 -12   1   8   -5.30   18.10
  11  -1  -8   16.40   21.40
  11  -1  -8  -29.20   18.00
 -11   1   8   27.30   17.70
 -11   1   8   28.20   17.50
  10  -1  -8  388.66   28.60
  10  -1  -8  377.26   28.90
 -10   1   8  383.16   24.10
 -10   1   8  342.97   27.30
   9  -1  -8  355.46   28.50
   9  -1  -8  336.77   27.70
  -9   1   8  396.66   24.10
  -9   1   8  367.86   23.30
   8  -1  -8  151.18   19.20
   8  -1  -8   98.99   21.90
  -8   1   8  146.09   18.90
  -8   1   8  142.69   19.20
   7  -1  -8 1118.29   38.20
   7  -1  -8 1113.09   42.80
  -7   1   8 1084.39   38.60
  -7   1   8 1120.69   38.90
   6  -1  -8  494.45   28.30
   6  -1  -8  451.75   31.00
  -6   1   8  474.35   29.20
  -6   1   8  504.75   28.90
   5  -1  -8  397.76   27.30
   5  -1  -8  397.76   30.50
  -5   1   8  386.86   27.50
  -5   1   8  421.96   29.00
   4  -1  -8  197.58   19.50
   4  -1  -8  205.18   21.70
  -4   1   8  209.88   20.60
  -4   1   8  205.48   19.60
   3  -1  -8   81.69   17.10
   3  -1  -8   55.79   17.50
  -3   1   8   55.69   18.20
  -3   1   8   40.50   17.70
   2  -1  -8   14.90   16.80
   2  -1  -8   -9.20   18.10
  -2   1   8  -14.00   17.70
  -2   1   8   -4.40   16.90
   1  -1  -8  148.29   22.10
   1  -1  -8  133.49   17.90
  -1   1   8  152.78   19.60
  -1   1   8  149.88   19.60
   0  -1  -8   55.29   17.50
   0  -1  -8   36.90   20.20
   0   1   8   43.70   18.80
   0   1   8   74.29   18.20
  -1  -1  -8  808.72   34.00
  -1  -1  -8  772.92   36.00
   1   1   8  809.42   34.90
   1   1   8  777.22   34.30
  -2  -1  -8   84.89   17.80
  -2  -1  -8   85.99   21.10
   2   1   8   98.89   20.10
   2   1   8  107.19   19.20
  -3  -1  -8  271.37   23.80
  -3  -1  -8  285.37   22.20
   3   1   8  298.67   22.50
   3   1   8  234.58   21.10
  -4  -1  -8   19.10   18.20
  -4  -1  -8  -13.00   20.10
   4   1   8   16.60   19.30
   4   1   8   -4.20   18.30
  -5  -1  -8  363.86   25.80
  -5  -1  -8  290.67   23.80
   5   1   8  364.56   24.80
   5   1   8  317.17   23.30
  -6  -1  -8  335.27   26.00
  -6  -1  -8  466.75   31.70
   6   1   8  326.27   24.80
   6   1   8  360.56   26.10
  -7  -1  -8  609.24   35.50
  -7  -1  -8  624.44   38.30
   7   1   8  611.84   36.10
  -8  -1  -8  261.57   25.50
  -8  -1  -8  257.67   26.40
   8   1   8  216.18   25.40
  -9  -1  -8   69.79   22.80
  -9  -1  -8   71.59   25.10
   9   1   8   22.60   24.20
 -10  -1  -8  227.58   28.10
 -10  -1  -8  240.88   29.80
  10   1   8  235.68   29.20
 -11  -1  -8   51.99   27.20
 -11  -1  -8   49.50   26.50
  11   1   8  130.29   31.00
 -12  -1  -8    3.40   27.90
 -12  -1  -8   30.80   27.80
 -13  -1  -8   92.29   29.40
 -13  -1  -8  104.39   29.90
 -14  -1  -8   23.40   31.20
 -14  -1  -8   45.80   30.30
 -15  -1  -8   20.10   32.80
 -16  -1  -8   27.20   35.10
 -19   2   8   21.80   32.10
 -18   2   8   -6.80   30.10
 -17   2   8  117.99   30.60
  16  -2  -8   22.50   29.90
 -16   2   8   -2.70   26.30
  15  -2  -8    1.20   28.20
 -15   2   8  -12.60   22.50
 -15   2   8  -16.00   25.60
  14  -2  -8   79.89   28.40
  14  -2  -8   58.59   28.90
 -14   2   8  115.89   24.40
 -14   2   8  108.39   26.60
  13  -2  -8   69.29   27.20
  13  -2  -8   58.09   25.90
 -13   2   8   94.99   23.10
 -13   2   8   46.60   23.90
  12  -2  -8  143.19   25.60
  12  -2  -8  123.19   27.30
 -12   2   8  162.18   22.60
 -12   2   8  160.98   24.60
  11  -2  -8   65.39   22.30
  11  -2  -8   57.39   24.60
 -11   2   8   76.49   22.50
 -11   2   8   51.09   20.30
  10  -2  -8   85.99   23.80
  10  -2  -8   39.60   21.80
 -10   2   8   51.49   19.20
 -10   2   8   72.99   20.60
   9  -2  -8   28.30   20.10
   9  -2  -8   27.10   21.80
  -9   2   8   -2.30   19.20
  -9   2   8   17.90   17.30
   8  -2  -8    5.90   20.70
   8  -2  -8    4.40   18.60
  -8   2   8   34.00   17.60
  -8   2   8    8.90   19.00
   7  -2  -8  106.69   20.70
   7  -2  -8  139.19   21.20
  -7   2   8  141.99   19.30
  -7   2   8  124.39   20.00
   6  -2  -8  326.57   25.20
   6  -2  -8  347.47   23.40
  -6   2   8  315.77   23.70
  -6   2   8  368.66   23.30
   5  -2  -8  394.96   29.40
  -5   2   8  385.66   27.70
  -5   2   8  350.36   23.70
   4  -2  -8  209.78   21.60
  -4   2   8  232.68   22.50
  -4   2   8  233.78   20.50
   3  -2  -8   -9.80   17.80
   3  -2  -8   -8.50   19.10
  -3   2   8   21.50   19.20
  -3   2   8    9.20   17.50
   2  -2  -8  813.22   36.00
   2  -2  -8  820.42   36.10
  -2   2   8  765.72   32.90
  -2   2   8  748.43   33.90
   1  -2  -8  923.41   37.40
   1  -2  -8  992.40   38.40
   1  -2  -8  893.41   37.30
  -1   2   8  958.00   37.00
  -1   2   8  896.81   34.80
   0  -2  -8   85.09   19.80
   0  -2  -8  113.29   20.00
   0  -2  -8   93.69   22.20
   0   2   8   55.19   17.90
   0   2   8  100.59   19.80
  -1  -2  -8  704.73   33.00
  -1  -2  -8  720.23   35.40
  -1  -2  -8  728.73   34.10
   1   2   8  730.53   34.90
   1   2   8  624.54   40.30
  -2  -2  -8   65.99   18.80
  -2  -2  -8   62.59   17.70
  -2  -2  -8   83.09   22.30
   2   2   8   87.19   20.20
  -3  -2  -8   45.00   18.20
  -3  -2  -8   32.80   17.80
  -3  -2  -8   39.80   21.70
   3   2   8    9.60   18.30
  -4  -2  -8   53.69   19.20
  -4  -2  -8  108.99   23.30
  -4  -2  -8   89.79   18.70
   4   2   8   77.89   19.60
  -5  -2  -8   -8.20   21.30
  -5  -2  -8   -2.90   17.20
  -5  -2  -8  -15.00   18.50
   5   2   8    4.50   20.00
  -6  -2  -8   70.79   24.30
  -6  -2  -8   65.29   19.40
  -6  -2  -8   14.30   20.00
   6   2   8  -34.10   20.80
  -7  -2  -8  230.48   27.60
  -7  -2  -8  194.48   23.80
  -7  -2  -8  230.08   22.10
   7   2   8  253.07   25.80
  -8  -2  -8   19.10   21.40
  -8  -2  -8    8.20   25.20
  -8  -2  -8   63.29   34.80
   8   2   8   -0.80   24.20
  -9  -2  -8  -31.00   26.10
  -9  -2  -8    2.50   23.20
   9   2   8   24.20   29.30
 -10  -2  -8   56.89   24.30
 -10  -2  -8   50.79   27.60
 -11  -2  -8   19.80   25.80
 -11  -2  -8   17.80   28.00
 -12  -2  -8  190.58   29.90
 -12  -2  -8  190.58   32.40
 -13  -2  -8   20.80   30.00
 -13  -2  -8   63.99   29.10
 -14  -2  -8  -12.30   30.80
 -14  -2  -8  -30.50   28.50
 -15  -2  -8   71.19   33.70
 -15  -2  -8  125.49   33.20
  18  -3  -8    4.90   33.20
 -18   3   8    1.80   34.70
  17  -3  -8   -9.40   32.30
  17  -3  -8   37.60   37.50
 -17   3   8   39.80   33.30
  16  -3  -8   36.40   32.00
  16  -3  -8  -26.00   34.60
 -16   3   8   -6.70   31.50
  15  -3  -8   -6.30   32.90
  15  -3  -8   59.09   31.50
 -15   3   8   51.29   31.30
  14  -3  -8  186.58   34.60
  14  -3  -8  159.38   32.90
 -14   3   8  188.38   32.30
  13  -3  -8   -2.40   29.10
  13  -3  -8  -19.50   29.00
 -13   3   8   61.99   27.40
  12  -3  -8  -10.60   26.20
  12  -3  -8   28.10   28.40
 -12   3   8   13.70   25.80
  11  -3  -8   29.50   27.20
  11  -3  -8   26.20   26.90
 -11   3   8   52.49   24.50
  10  -3  -8   29.10   25.40
  10  -3  -8   40.90   26.20
 -10   3   8   36.60   23.80
 -10   3   8   42.90   21.30
   9  -3  -8   25.00   23.60
   9  -3  -8   36.80   23.20
  -9   3   8   17.40   22.60
  -9   3   8   -8.10   18.10
   8  -3  -8   -5.50   21.70
   8  -3  -8   37.40   22.40
  -8   3   8   13.90   21.30
  -8   3   8   11.40   19.30
   7  -3  -8    3.60   21.40
   7  -3  -8   49.40   21.50
  -7   3   8   34.20   18.80
  -7   3   8   10.80   20.30
   6  -3  -8   -8.60   21.00
  -6   3   8   44.90   18.10
  -6   3   8  -27.00   19.10
   5  -3  -8   30.90   21.30
  -5   3   8   73.59   19.70
  -5   3   8   48.50   17.60
   4  -3  -8  480.15   34.60
   4  -3  -8  514.15   32.50
  -4   3   8  513.65   32.80
   3  -3  -8  119.49   21.80
   3  -3  -8  137.09   20.90
  -3   3   8  120.99   21.50
   2  -3  -8  557.84   35.90
   2  -3  -8  541.75   31.30
   2  -3  -8  515.85   33.50
  -2   3   8  503.25   32.50
   1  -3  -8   88.19   21.60
   1  -3  -8   89.29   19.70
   1  -3  -8   38.30   20.00
  -1   3   8   81.19   19.60
   0  -3  -8  130.19   22.40
   0  -3  -8   92.09   19.60
   0  -3  -8  119.49   20.80
   0   3   8  121.99   21.00
  -1  -3  -8  152.58   21.70
  -1  -3  -8  133.19   21.60
  -1  -3  -8  167.98   24.50
   1   3   8  211.08   22.40
  -2  -3  -8  467.25   30.40
  -2  -3  -8  391.76   30.80
  -2  -3  -8  471.25   32.20
   2   3   8  414.66   31.70
  -3  -3  -8   64.89   20.40
  -3  -3  -8   43.50   20.20
  -3  -3  -8   59.99   23.50
   3   3   8   52.79   21.20
  -4  -3  -8   -2.50   19.90
  -4  -3  -8    4.20   19.80
  -4  -3  -8   53.29   25.10
  -4  -3  -8   43.20   27.50
   4   3   8    3.60   20.10
  -5  -3  -8   33.00   21.20
  -5  -3  -8   23.10   25.50
  -5  -3  -8   36.20   20.90
   5   3   8   67.09   22.10
  -6  -3  -8  224.28   25.10
  -6  -3  -8  201.98   23.90
  -6  -3  -8  217.28   28.80
  -7  -3  -8   23.00   26.60
  -7  -3  -8   22.90   22.30
  -7  -3  -8   56.49   27.90
  -8  -3  -8   58.39   23.00
  -8  -3  -8   86.79   28.30
  -9  -3  -8   31.40   23.70
  -9  -3  -8   65.69   29.00
 -10  -3  -8   33.00   24.40
 -10  -3  -8   40.20   29.50
 -11  -3  -8  -47.50   25.00
 -11  -3  -8    3.10   29.40
 -12  -3  -8   38.20   27.30
 -12  -3  -8    0.80   29.90
 -13  -3  -8   90.59   33.00
 -13  -3  -8   48.40   27.40
 -14  -3  -8   11.50   28.80
 -14  -3  -8   24.20   32.00
  16  -4  -8   -3.70   39.60
  16  -4  -8   -3.10   32.40
 -16   4   8  -24.80   41.30
  15  -4  -8   -7.80   39.10
  15  -4  -8   59.89   33.00
 -15   4   8   49.10   35.10
  14  -4  -8  -23.60   31.20
  14  -4  -8   12.60   36.70
 -14   4   8  -10.90   32.20
  13  -4  -8  163.18   34.10
  13  -4  -8  251.67   39.20
 -13   4   8  199.48   34.40
  12  -4  -8  -51.29   32.30
  12  -4  -8   20.50   29.10
 -12   4   8  -17.00   29.20
  11  -4  -8   36.40   26.80
  11  -4  -8   20.70   31.10
 -11   4   8  -23.20   27.80
  10  -4  -8  288.17   31.40
  10  -4  -8  361.46   35.90
 -10   4   8  398.66   34.50
   9  -4  -8   51.99   26.10
   9  -4  -8   77.99   29.90
  -9   4   8   61.69   27.10
   8  -4  -8  -10.70   27.40
  -8   4   8  -13.00   24.20
   7  -4  -8   -1.30   26.40
  -7   4   8  -11.40   23.10
   6  -4  -8  550.04   41.90
  -6   4   8  555.14   38.20
   5  -4  -8    3.00   24.70
  -5   4   8   -3.00   21.30
   4  -4  -8   84.39   34.80
   4  -4  -8  102.29   25.30
  -4   4   8   84.49   24.20
   3  -4  -8    6.30   23.10
   3  -4  -8  -12.90   21.90
  -3   4   8   11.00   21.90
   2  -4  -8  308.57   27.90
   2  -4  -8  231.78   26.10
  -2   4   8  232.88   25.60
   1  -4  -8   -2.50   23.20
   1  -4  -8    8.60   26.60
   1  -4  -8   36.30   22.30
  -1   4   8  -18.80   22.40
   0  -4  -8  137.89   24.00
   0  -4  -8  142.99   24.20
   0  -4  -8  146.79   29.00
  -1  -4  -8   13.90   22.80
  -1  -4  -8    2.00   25.30
  -1  -4  -8  -17.30   21.60
  -2  -4  -8  160.38   24.40
  -2  -4  -8  118.99   24.10
  -2  -4  -8  206.68   29.10
  -3  -4  -8  -16.80   22.30
  -3  -4  -8  -16.70   24.30
  -3  -4  -8   16.70   27.90
  -4  -4  -8   67.09   28.00
  -4  -4  -8   68.19   23.40
  -4  -4  -8  134.79   26.80
  -5  -4  -8   -2.10   22.70
  -5  -4  -8   -5.20   29.00
  -6  -4  -8   16.00   29.60
  -6  -4  -8   -7.70   22.20
  -7  -4  -8   42.80   23.40
  -7  -4  -8    5.80   29.10
  -8  -4  -8  112.59   30.40
  -8  -4  -8  126.59   25.30
  -9  -4  -8    0.00   24.20
  -9  -4  -8   82.59   30.80
 -10  -4  -8  -11.50   31.00
 -10  -4  -8    1.30   23.90
 -11  -4  -8   50.89   32.60
 -11  -4  -8   13.30   24.60
 -12  -4  -8   35.20   26.80
 -12  -4  -8    5.90   32.10
  13  -5  -8  -18.50   29.60
  13  -5  -8  -54.79   36.60
  12  -5  -8   -2.20   35.60
  12  -5  -8   29.20   30.50
  11  -5  -8  240.38   39.80
  10  -5  -8   63.39   35.10
   9  -5  -8   17.10   33.20
   8  -5  -8  208.88   33.70
   7  -5  -8  263.87   34.50
   6  -5  -8   68.79   29.90
   5  -5  -8  -28.50   28.00
   4  -5  -8   87.59   28.10
   3  -5  -8   13.30   26.40
   2  -5  -8  -11.60   26.40
   1  -5  -8   37.60   25.80
   1  -5  -8   43.90   32.00
   0  -5  -8  117.89   26.50
   0  -5  -8   63.39   32.20
  -1  -5  -8  136.09   26.20
  -1  -5  -8  141.89   33.30
  -2  -5  -8   84.79   24.90
  -2  -5  -8  151.78   33.10
  -3  -5  -8   41.70   31.80
  -3  -5  -8   73.69   24.70
  -4  -5  -8   31.30   30.90
  -4  -5  -8   21.40   23.50
  -5  -5  -8   11.80   32.20
  -5  -5  -8   17.20   24.10
  -6  -5  -8    6.30   23.10
  -6  -5  -8    0.40   31.40
  -7  -5  -8   53.69   24.40
  -7  -5  -8   17.60   32.60
  -8  -5  -8   22.30   23.80
  -8  -5  -8    6.50   31.40
  -9  -5  -8   39.10   32.40
  -9  -5  -8   17.60   24.90
   8  -6  -8   28.50   33.60
   7  -6  -8    5.10   32.00
   6  -6  -8   80.39   31.90
   5  -6  -8   90.59   31.20
   4  -6  -8  110.29   30.40
   3  -6  -8  -28.80   28.70
   2  -6  -8   53.89   27.80
   1  -6  -8    1.50   26.00
   1  -6  -8   62.19   36.30
   0  -6  -8   61.49   37.30
   0  -6  -8   21.20   25.80
  -1  -6  -8  -40.90   34.60
  -1  -6  -8    8.80   25.30
  -2  -6  -8   36.60   25.70
  -2  -6  -8  -29.40   33.60
  -3  -6  -8  -10.00   25.00
  -3  -6  -8    9.90   35.00
  -4  -6  -8  202.38   28.10
  -4  -6  -8  244.78   36.70
  -3  -6   9   15.50   21.50
  -2  -6   9   11.40   23.90
  -1  -6   9   62.19   25.10
   0  -6   9   77.49   27.80
   1  -6   9  -52.39   27.90
   2  -6   9   41.40   21.20
   3  -6   9   -3.10   23.30
  -3  -5   9    7.60   18.20
  -2  -5   9   32.80   20.50
  -1  -5   9  145.09   23.30
   0  -5   9   70.39   23.80
   1  -5   9    4.90   16.40
   1  -5   9   47.30   24.60
   1  -5   9   20.70   20.10
   2  -5   9   26.40   21.50
   2  -5   9   72.59   26.10
   3  -5   9  -35.10   28.10
   3  -5   9  -17.50   22.40
   4  -5   9    8.20   24.90
   5  -5   9   16.50   26.40
   6  -5   9   65.19   29.10
   7  -5   9   52.09   29.40
   8  -5   9  -11.50   30.00
 -16  -4   9   47.50   16.40
  15   4  -9   24.50   28.50
 -15  -4   9   13.10   14.50
  14   4  -9   14.50   26.80
  13   4  -9  465.15   39.00
  12   4  -9   16.10   23.10
  -3  -4   9  156.58   17.30
  -2  -4   9   81.99   17.70
  -1  -4   9   24.60   18.70
   0  -4   9   93.29   21.20
   0  -4   9   95.89   17.90
   0  -4   9  103.79   15.70
   1  -4   9   89.49   16.30
   1  -4   9   43.30   19.30
   1  -4   9   65.89   21.90
   2  -4   9   49.90   16.30
   2  -4   9  102.09   21.50
   2  -4   9   88.29   23.30
   3  -4   9   -0.60   22.00
   3  -4   9   42.40   23.50
   4  -4   9  221.18   26.40
   4  -4   9  223.88   27.50
   5  -4   9   12.40   24.60
   6  -4   9  -29.00   25.50
   7  -4   9  -14.30   27.50
   8  -4   9  130.39   31.30
   9  -4   9   -3.60   30.00
  10  -4   9   86.69   33.80
  11  -4   9   27.00   34.60
 -18  -3   9  103.89   21.30
 -17  -3   9    3.80   18.10
 -16  -3   9   17.60   17.50
 -15  -3   9  131.89   18.10
 -14  -3   9    6.00   14.80
 -13  -3   9  -13.40   13.80
  12   3  -9   29.00   23.60
 -12  -3   9   19.70   13.70
  11   3  -9  158.98   24.60
 -11  -3   9  106.39   14.00
  10   3  -9   -5.00   20.50
   9   3  -9   31.80   19.00
   8   3  -9    2.60   16.80
  -4  -3   9  349.77   19.50
  -4  -3   9  386.46   21.00
  -3  -3   9   98.59   12.60
  -3  -3   9   95.09   14.60
  -2  -3   9   22.30   12.60
  -2  -3   9   39.30   13.00
  -2  -3   9   27.50   11.40
  -2  -3   9   34.20   14.70
  -1  -3   9  151.38   16.10
  -1  -3   9  148.49   14.20
  -1  -3   9  153.38   17.50
  -1  -3   9  184.08   16.00
   0  -3   9   11.40   13.50
   0  -3   9    5.50   15.30
   0  -3   9   23.80   16.00
   1  -3   9   16.80   14.10
   1  -3   9   24.50   16.70
   1  -3   9    1.40   16.70
   2  -3   9  -12.70   17.70
   2  -3   9   20.90   14.20
   2  -3   9  -10.30   17.90
  -3   3  -9   83.59   21.70
   3  -3   9   68.89   20.20
   3  -3   9   59.09   19.40
   3  -3   9   33.40   15.30
   4  -3   9    8.80   21.10
   4  -3   9   26.90   20.70
   4  -3   9  -14.80   19.20
   5  -3   9  -13.70   20.90
   5  -3   9  -26.50   22.10
   6  -3   9  273.17   28.40
   7  -3   9   31.80   26.60
   8  -3   9   85.49   29.00
  12  -3   9   39.00   33.60
  13  -3   9    5.70   35.20
 -19  -2   9  202.68   21.80
 -19  -2   9  204.78   25.40
 -18  -2   9  171.68   20.90
 -18  -2   9  228.98   24.60
 -17  -2   9  170.38   19.50
 -17  -2   9  198.88   22.60
 -16  -2   9   24.40   18.70
 -16  -2   9    9.50   16.00
 -15  -2   9   90.69   16.20
 -15  -2   9   88.29   15.70
 -15  -2   9   70.89   18.50
 -14  -2   9   22.40   13.40
 -14  -2   9    0.50   14.00
 -14  -2   9    4.50   16.20
 -13  -2   9    4.60   13.10
 -13  -2   9   -1.00   15.80
 -13  -2   9    9.40   11.80
 -12  -2   9   45.20   15.40
 -12  -2   9   51.69   11.90
 -12  -2   9   39.70   12.90
  11   2  -9   53.39   22.00
 -11  -2   9   35.50   10.70
 -11  -2   9   50.19   14.30
 -11  -2   9   35.50   12.50
  10   2  -9   -9.30   20.50
 -10  -2   9    8.40   13.00
 -10  -2   9    7.40   10.30
 -10  -2   9   -6.60   11.70
   9   2  -9  179.58   22.20
  -9  -2   9  127.39   14.10
   8   2  -9  151.48   20.10
  -8  -2   9   82.69   12.70
   7   2  -9  183.58   19.00
  -7  -2   9  166.98   14.40
  -6  -2   9   87.39   14.20
  -6  -2   9  113.39   13.50
  -5  -2   9   72.09   11.70
  -5  -2   9   68.59   13.30
  -5  -2   9   70.19   13.50
  -4  -2   9   24.40   13.10
  -4  -2   9   -4.90   11.10
  -4  -2   9   20.90   12.90
  -4  -2   9    8.40   11.10
  -3  -2   9  336.67   21.60
  -3  -2   9  280.77   21.70
  -3  -2   9  379.76   20.30
  -3  -2   9  351.76   20.30
  -2  -2   9  139.19   14.70
  -2  -2   9  152.08   14.30
  -2  -2   9  150.08   15.60
  -2  -2   9  164.88   15.10
  -1  -2   9  448.46   24.20
  -1  -2   9  407.26   22.50
  -1  -2   9  408.16   23.40
  -1  -2   9  421.06   24.40
   0  -2   9  123.79   16.60
   0  -2   9  112.69   16.60
   0  -2   9  119.99   16.30
   0  -2   9  157.18   15.00
  -1   2  -9   -4.00   14.70
   1  -2   9   -0.90   15.60
   1  -2   9    1.80   13.40
   1  -2   9   21.10   16.10
   1  -2   9   36.90   16.40
  -2   2  -9   15.50   15.40
   2  -2   9  -28.00   16.70
   2  -2   9    4.90   16.50
   2  -2   9  -12.30   15.90
   2  -2   9    2.60   13.50
  -3   2  -9  175.98   19.00
   3  -2   9  171.28   19.90
   3  -2   9  230.48   20.60
   3  -2   9  141.49   17.80
  -4   2  -9  100.59   18.80
   4  -2   9   92.79   19.20
   4  -2   9  126.59   19.90
  -5   2  -9   64.79   18.90
   5  -2   9   76.99   21.10
   5  -2   9   87.09   20.30
  -6   2  -9   56.69   19.60
   6  -2   9   47.70   23.00
   6  -2   9    6.00   20.30
  -7   2  -9  -21.40   20.00
   7  -2   9   45.80   24.10
  -8   2  -9  143.49   25.40
   8  -2   9  138.79   27.40
  -9   2  -9  186.98   27.80
   9  -2   9  164.38   30.50
 -10   2  -9   76.69   27.90
  10  -2   9   33.60   30.50
 -11   2  -9   -2.80   28.90
  11  -2   9  -14.60   31.00
 -12   2  -9   46.10   32.70
  12  -2   9   86.89   34.10
 -13   2  -9   44.00   33.50
  13  -2   9  -17.50   33.90
 -14   2  -9   19.40   39.60
  14  -2   9   39.80   35.60
 -20  -1   9    5.40   22.30
 -20  -1   9   29.50   24.50
 -19  -1   9   33.40   21.40
 -19  -1   9  -26.80   22.10
 -18  -1   9   43.00   22.20
 -18  -1   9   16.80   20.00
 -17  -1   9   38.70   19.60
 -17  -1   9   28.50   21.20
 -16  -1   9   -0.10   20.40
 -16  -1   9   19.40   18.50
 -15  -1   9  174.68   21.80
 -15  -1   9  150.08   19.90
 -14  -1   9    0.60   17.50
 -14  -1   9    2.20   16.80
 -14  -1   9  -29.40   16.00
 -13  -1   9   59.59   15.60
 -13  -1   9   63.19   18.10
 -13  -1   9   37.70   16.10
 -12  -1   9  508.05   28.40
 -12  -1   9  488.15   26.70
  11   1  -9  206.78   24.70
 -11  -1   9  203.58   18.30
 -11  -1   9  170.08   16.70
 -11  -1   9  188.98   15.40
  10   1  -9  531.95   34.40
 -10  -1   9  504.55   23.40
 -10  -1   9  533.05   26.10
 -10  -1   9  541.55   24.80
   9   1  -9   26.50   20.00
  -9  -1   9   76.19   14.90
  -9  -1   9   74.39   14.00
  -9  -1   9   54.19   12.70
   8   1  -9  771.92   37.00
  -8  -1   9  790.52   29.70
  -8  -1   9  867.51   30.10
  -8  -1   9  845.62   28.70
   7   1  -9   12.20   18.20
  -7  -1   9   32.00   13.70
  -7  -1   9   12.30   12.50
  -7  -1   9   11.70   14.00
   6   1  -9  183.08   20.40
  -6  -1   9  155.88   16.80
  -6  -1   9  157.98   15.70
  -6  -1   9  209.68   17.60
  -5  -1   9   49.40   14.10
  -5  -1   9   38.70   14.80
  -5  -1   9   37.00   14.70
  -5  -1   9   23.90   14.70
  -4  -1   9   84.69   14.80
  -4  -1   9  122.69   16.60
  -4  -1   9  127.59   16.70
  -4  -1   9  113.19   15.50
   3   1  -9  101.09   15.40
  -3  -1   9  100.09   15.30
  -3  -1   9   81.89   16.00
  -3  -1   9  102.09   15.80
  -3  -1   9   88.09   15.70
   2   1  -9  833.72   30.30
  -2  -1   9  768.12   31.20
  -2  -1   9  872.01   30.40
  -2  -1   9  796.42   30.90
  -2  -1   9  828.12   31.60
   1   1  -9  271.87   18.40
  -1  -1   9  240.18   19.50
  -1  -1   9  219.28   18.10
  -1  -1   9  258.77   18.90
  -1  -1   9  203.38   16.80
   0   1  -9  393.06   25.50
   0  -1   9  424.16   27.80
   0  -1   9  458.95   27.30
   0  -1   9  450.25   26.00
   0  -1   9  435.66   24.80
  -1   1  -9  143.79   17.40
   1  -1   9  154.08   18.90
   1  -1   9  113.99   16.70
   1  -1   9  135.59   18.90
  -2   1  -9   92.29   18.30
   2  -1   9  111.59   17.10
   2  -1   9   94.79   18.80
   2  -1   9  111.69   18.90
  -3   1  -9    6.80   16.70
   3  -1   9   43.60   18.50
   3  -1   9   23.90   16.60
   3  -1   9   56.39   18.60
  -4   1  -9    6.30   17.20
  -4   1  -9   18.80   18.80
   4  -1   9   19.50   18.70
   4  -1   9   35.20   20.30
   4  -1   9    5.60   17.10
  -5   1  -9   16.80   19.10
  -5   1  -9   -6.20   17.80
   5  -1   9   -5.80   20.00
  -6   1  -9  -15.90   20.20
  -6   1  -9  -14.80   18.80
   6  -1   9  -30.70   21.80
  -7   1  -9   37.80   21.30
  -7   1  -9   56.69   22.20
   7  -1   9   63.99   24.50
  -8   1  -9   -5.20   22.50
  -8   1  -9    8.70   22.10
   8  -1   9  -10.30   25.60
  -9   1  -9   58.49   23.70
   9  -1   9   18.50   26.90
 -10   1  -9  -13.70   24.40
  10  -1   9   42.20   29.00
 -11   1  -9   25.80   27.80
  11  -1   9   34.60   30.10
 -12   1  -9   62.39   30.50
  12  -1   9   60.49   32.40
 -13   1  -9   11.70   31.50
  13  -1   9  -90.09   33.00
 -14   1  -9   97.39   36.30
  14  -1   9   95.39   37.00
 -15   1  -9   45.00   36.80
  15  -1   9   20.20   35.60
 -20   0   9    4.80   25.40
 -20   0   9    4.40   23.60
 -19   0   9   32.50   24.90
 -19   0   9    1.10   22.50
 -18   0   9   -5.00   22.00
 -18   0   9   -1.30   22.40
 -17   0   9    4.00   22.60
 -17   0   9   40.90   21.60
 -16   0   9   15.90   20.80
 -16   0   9   -7.50   20.60
 -15   0   9   12.20   19.40
 -15   0   9   41.10   21.10
 -14   0   9   -5.70   18.90
 -14   0   9   -4.10   17.90
  13   0  -9   -1.90   18.30
 -13   0   9    0.70   18.00
 -13   0   9   -5.20   16.60
  12   0  -9    0.80   17.30
  12   0  -9    7.70   22.10
 -12   0   9  -19.50   16.90
 -12   0   9  -17.10   13.10
 -12   0   9   -8.10   16.20
  11   0  -9  373.76   26.70
  11   0  -9  364.16   28.80
 -11   0   9  396.66   24.10
 -11   0   9  308.47   23.30
 -11   0   9  332.47   27.00
  10   0  -9  -22.90   20.20
  10   0  -9   23.50   15.60
 -10   0   9  -20.40   15.20
 -10   0   9  -26.00   14.60
 -10   0   9   11.40   13.90
   9   0  -9  320.67   24.00
   9   0  -9  326.07   26.40
  -9   0   9  398.26   22.30
  -9   0   9  326.07   25.40
  -9   0   9  306.67   23.20
   8   0  -9    3.50   14.30
   8   0  -9   11.90   19.90
  -8   0   9   22.20   15.60
  -8   0   9    6.30   14.10
  -8   0   9   14.70   14.70
   7   0  -9  152.78   21.30
   7   0  -9  152.48   17.10
  -7   0   9  155.28   18.20
  -7   0   9  156.18   17.00
  -7   0   9  143.79   17.90
   6   0  -9   10.90   18.10
   6   0  -9   20.20   15.30
  -6   0   9   19.80   16.20
  -6   0   9    2.80   16.00
  -6   0   9  -17.20   15.20
   5   0  -9  952.20   34.00
  -5   0   9  935.11   34.80
  -5   0   9  924.21   35.20
  -5   0   9  952.30   39.90
   4   0  -9   -9.30   15.20
  -4   0   9   -8.20   17.40
  -4   0   9   -0.90   17.60
   3   0  -9 1876.51   52.19
  -3   0   9 1964.40   52.59
  -3   0   9 1836.12   52.69
  -3   0   9 1841.22   52.59
   2   0  -9   30.70   16.70
  -2   0   9   25.30   17.30
  -2   0   9    4.80   17.20
  -2   0   9    0.80   15.90
   1   0  -9   36.20   19.20
   1   0  -9   39.00   16.00
  -1   0   9   25.00   15.50
  -1   0   9    4.40   17.50
  -1   0   9   32.20   17.10
   0   0  -9    0.70   18.60
   0   0  -9    7.10   16.20
   0   0   9  -16.50   17.90
   0   0   9   -1.40   17.70
   0   0   9   -1.80   17.10
  -1   0  -9  155.88   18.80
  -1   0  -9  164.98   21.20
   1   0   9  141.89   20.30
   1   0   9  148.69   20.70
  -2   0  -9   -3.30   17.10
  -2   0  -9   39.60   19.70
   2   0   9  -15.80   18.20
   2   0   9   30.00   18.40
  -3   0  -9 1709.73   52.19
  -3   0  -9 1802.82   51.39
   3   0   9 1716.73   51.79
   3   0   9 1733.93   51.49
  -4   0  -9  -13.90   19.80
  -4   0  -9   23.50   19.00
   4   0   9  -13.00   19.60
   4   0   9    0.60   18.50
  -5   0  -9  737.53   35.60
  -5   0  -9  811.92   36.20
   5   0   9  781.32   36.40
   5   0   9  739.13   35.30
  -6   0  -9   -3.70   19.50
  -6   0  -9    6.30   20.90
   6   0   9   17.00   21.00
  -7   0  -9  202.58   24.20
  -7   0  -9  182.18   24.90
   7   0   9  201.68   24.80
  -8   0  -9  -14.00   21.70
  -8   0  -9    6.00   23.50
   8   0   9   12.00   24.30
  -9   0  -9  246.88   28.20
  -9   0  -9  230.48   28.00
   9   0   9  222.98   31.80
 -10   0  -9    8.50   25.50
 -10   0  -9    6.50   25.60
  10   0   9  -10.00   27.90
 -11   0  -9   -7.80   30.40
 -11   0  -9   -6.80   26.30
  11   0   9   17.60   30.90
 -12   0  -9  -29.90   27.40
  12   0   9  -11.40   30.70
 -13   0  -9   46.50   31.40
  13   0   9   12.10   33.80
 -14   0  -9   -5.10   33.30
 -15   0  -9  -20.10   34.70
 -20   1   9   48.30   31.80
 -20   1   9   10.30   27.40
 -19   1   9    7.00   25.50
 -19   1   9  -27.40   26.10
 -18   1   9  -40.00   23.00
 -18   1   9   -7.70   24.70
 -17   1   9    2.40   24.30
 -17   1   9   11.80   23.90
 -16   1   9   15.30   23.10
 -16   1   9    4.10   23.20
 -15   1   9  246.68   27.00
 -15   1   9  188.08   25.80
  14  -1  -9  -11.00   22.10
 -14   1   9   29.40   21.20
 -14   1   9   20.50   20.80
  13  -1  -9   25.80   24.20
  13  -1  -9   58.79   22.20
 -13   1   9   51.49   20.70
 -13   1   9   33.10   20.50
  12  -1  -9  549.35   34.00
  12  -1  -9  456.55   37.90
 -12   1   9  501.55   32.90
 -12   1   9  462.15   32.10
  11  -1  -9  205.28   25.90
  11  -1  -9  191.88   22.30
 -11   1   9  215.88   21.80
 -11   1   9  232.68   22.20
  10  -1  -9  531.05   36.20
  10  -1  -9  596.94   32.30
 -10   1   9  559.24   31.00
 -10   1   9  554.74   31.90
   9  -1  -9   55.89   21.70
   9  -1  -9   52.69   17.60
  -9   1   9   50.79   17.40
  -9   1   9   72.69   17.60
   8  -1  -9  794.72   38.40
   8  -1  -9  869.51   34.40
  -8   1   9  812.72   34.70
  -8   1   9  755.32   33.60
   7  -1  -9   10.40   18.60
   7  -1  -9    3.50   16.20
  -7   1   9   31.00   17.70
  -7   1   9    1.00   16.40
   6  -1  -9  168.68   21.80
   6  -1  -9  138.49   19.10
  -6   1   9  167.78   20.00
  -6   1   9  152.08   19.70
   5  -1  -9   46.60   19.20
   5  -1  -9   40.20   17.40
  -5   1   9   16.70   18.20
  -5   1   9   34.80   18.10
   4  -1  -9  119.79   18.70
   4  -1  -9   98.99   21.20
  -4   1   9   95.19   20.00
  -4   1   9   83.79   19.60
   3  -1  -9   82.99   18.50
   3  -1  -9   70.89   19.90
  -3   1   9   98.79   19.50
  -3   1   9  115.29   19.40
   2  -1  -9  778.82   34.60
   2  -1  -9  864.31   35.40
  -2   1   9  780.52   36.20
  -2   1   9  843.02   34.50
   1  -1  -9  196.98   22.20
   1  -1  -9  184.48   20.90
  -1   1   9  206.58   22.00
  -1   1   9  185.68   20.50
   0  -1  -9  472.65   30.10
   0  -1  -9  479.85   32.40
   0   1   9  488.85   30.90
   0   1   9  521.35   32.10
  -1  -1  -9  152.98   22.20
  -1  -1  -9  134.69   19.40
   1   1   9  132.49   20.80
   1   1   9  128.19   20.70
  -2  -1  -9  129.69   22.40
  -2  -1  -9   92.39   18.30
   2   1   9   87.39   20.10
   2   1   9  108.49   21.00
  -3  -1  -9   -0.70   20.10
  -3  -1  -9   35.80   18.30
   3   1   9   -1.60   19.80
   3   1   9   43.30   19.50
  -4  -1  -9    7.80   21.10
  -4  -1  -9   57.09   19.50
   4   1   9   41.00   19.10
   4   1   9   56.59   20.10
  -5  -1  -9   38.30   19.60
  -5  -1  -9   49.60   22.20
   5   1   9  -19.30   20.00
   5   1   9   12.90   19.30
  -6  -1  -9    4.30   20.40
  -6  -1  -9    5.10   21.90
   6   1   9   40.00   20.90
   6   1   9    0.80   22.00
  -7  -1  -9   95.89   24.80
  -7  -1  -9   45.30   22.00
   7   1   9   45.20   24.00
  -8  -1  -9   47.50   22.80
  -8  -1  -9   36.40   25.10
   8   1   9   18.10   23.90
  -9  -1  -9   47.70   24.60
  -9  -1  -9   32.60   27.00
   9   1   9   18.90   25.40
 -10  -1  -9    2.60   26.00
 -10  -1  -9  -37.30   27.00
  10   1   9  -16.50   27.20
 -11  -1  -9   18.80   27.30
 -11  -1  -9  -73.89   26.60
  11   1   9    0.90   31.30
 -12  -1  -9  109.39   29.40
 -12  -1  -9   63.89   29.80
 -13  -1  -9   10.00   30.10
 -13  -1  -9   22.70   30.40
 -14  -1  -9  103.49   33.10
 -15  -1  -9   15.60   33.60
 -19   2   9  288.87   38.10
  18  -2  -9  250.47   36.90
 -18   2   9  252.37   35.30
  17  -2  -9  182.38   34.10
 -17   2   9  203.58   33.50
  16  -2  -9  -16.50   28.70
  16  -2  -9   15.40   30.70
 -16   2   9   43.50   28.00
  15  -2  -9  132.19   30.90
  15  -2  -9   46.40   29.80
 -15   2   9   90.89   27.00
 -15   2   9   95.79   25.50
  14  -2  -9   -9.50   27.00
  14  -2  -9   24.70   28.60
 -14   2   9   52.29   25.60
 -14   2   9   14.20   21.80
  13  -2  -9  -22.90   24.30
  13  -2  -9   31.00   27.00
 -13   2   9  -16.30   22.00
 -13   2   9   18.10   23.30
  12  -2  -9   37.50   24.70
  12  -2  -9   65.79   27.10
 -12   2   9   61.09   23.40
 -12   2   9   79.79   23.30
  11  -2  -9   16.90   24.00
  11  -2  -9   28.30   22.60
 -11   2   9   17.60   21.80
 -11   2   9   40.00   21.20
  10  -2  -9   22.20   23.10
  10  -2  -9    7.10   21.10
 -10   2   9   10.20   20.30
 -10   2   9    3.00   18.00
   9  -2  -9  162.08   24.50
   9  -2  -9  144.09   22.10
  -9   2   9  144.59   20.90
  -9   2   9  139.49   22.30
   8  -2  -9  115.79   21.90
   8  -2  -9  131.39   21.30
  -8   2   9   96.09   20.70
  -8   2   9  102.89   19.80
   7  -2  -9  195.88   23.10
   7  -2  -9  177.18   21.80
  -7   2   9  201.38   22.30
  -7   2   9  163.58   20.10
   6  -2  -9  138.79   20.70
  -6   2   9  118.79   20.30
  -6   2   9   99.69   19.60
   5  -2  -9   80.19   19.50
  -5   2   9   80.99   18.40
  -5   2   9   64.29   19.80
   4  -2  -9  -17.40   18.50
   4  -2  -9   -6.60   19.30
  -4   2   9   24.90   19.40
  -4   2   9    3.40   18.60
   3  -2  -9  368.46   24.60
   3  -2  -9  366.96   25.20
  -3   2   9  396.26   31.00
  -3   2   9  362.06   28.50
   2  -2  -9  212.28   22.30
   2  -2  -9  183.98   22.20
  -2   2   9  167.18   21.00
  -2   2   9  198.18   21.30
   1  -2  -9  433.66   30.20
   1  -2  -9  396.66   31.10
  -1   2   9  396.76   31.00
  -1   2   9  378.26   28.20
   0  -2  -9  145.39   23.00
   0  -2  -9  126.99   20.80
   0   2   9  185.38   22.20
   0   2   9  185.98   21.00
  -1  -2  -9  -12.20   21.00
  -1  -2  -9  -12.20   18.30
  -1  -2  -9    1.70   19.00
   1   2   9  -21.60   18.20
   1   2   9    4.40   19.60
  -2  -2  -9   -3.60   17.30
  -2  -2  -9   -4.70   18.70
  -2  -2  -9   -8.90   21.50
   2   2   9    7.20   19.60
   2   2   9    8.40   22.80
  -3  -2  -9  179.48   19.80
  -3  -2  -9  160.78   21.10
  -3  -2  -9  163.28   24.10
   3   2   9  193.78   22.50
  -4  -2  -9  116.89   24.50
  -4  -2  -9  135.19   21.50
  -4  -2  -9  112.19   19.90
   4   2   9  108.69   21.80
  -5  -2  -9   55.99   23.90
  -5  -2  -9   58.49   19.30
  -5  -2  -9   88.09   21.60
   5   2   9   98.09   22.80
  -6  -2  -9   -1.40   18.60
  -6  -2  -9   31.90   21.90
  -6  -2  -9  -39.40   24.20
   6   2   9  -10.10   23.10
  -7  -2  -9    0.30   22.70
  -7  -2  -9   17.40   25.60
   7   2   9   51.39   24.20
  -8  -2  -9  126.99   28.60
  -8  -2  -9  167.78   25.60
   8   2   9   98.59   27.30
  -9  -2  -9  181.88   30.90
  -9  -2  -9  125.79   26.80
 -10  -2  -9   62.29   26.10
 -10  -2  -9  127.39   30.20
 -11  -2  -9  -17.50   27.20
 -11  -2  -9  -11.40   29.60
 -12  -2  -9   93.19   32.70
 -12  -2  -9   88.69   30.00
 -13  -2  -9    8.50   28.30
 -13  -2  -9   17.90   30.60
 -14  -2  -9   19.30   32.00
 -14  -2  -9   44.30   31.10
 -15  -2  -9  -17.40   32.50
 -15  -2  -9   23.80   34.60
  18  -3  -9  150.18   36.60
 -18   3   9   82.69   36.10
  17  -3  -9   32.60   33.40
  17  -3  -9  -30.60   35.80
 -17   3   9   28.00   34.10
  16  -3  -9    0.40   32.30
  16  -3  -9   40.30   35.70
 -16   3   9   72.69   32.60
  15  -3  -9  221.88   36.90
  15  -3  -9  190.68   35.50
 -15   3   9  145.39   33.00
  14  -3  -9    2.60   32.00
  14  -3  -9   -5.70   29.10
 -14   3   9   17.70   29.20
  13  -3  -9  -33.10   27.80
  13  -3  -9   42.50   30.40
 -13   3   9   20.10   27.10
  12  -3  -9   21.70   29.40
  12  -3  -9   43.10   28.20
 -12   3   9   93.39   27.90
  11  -3  -9  136.49   28.90
  11  -3  -9  174.68   31.10
 -11   3   9  173.68   29.00
  10  -3  -9   12.20   24.10
  10  -3  -9   16.80   24.80
 -10   3   9    6.60   24.60
   9  -3  -9   -2.80   22.50
   9  -3  -9  -14.30   23.90
  -9   3   9   10.10   22.70
  -9   3   9   44.50   21.30
   8  -3  -9   -8.00   23.80
   8  -3  -9    0.50   22.70
  -8   3   9  -35.50   21.50
  -8   3   9   -4.20   19.90
   7  -3  -9  403.26   30.10
  -7   3   9  395.46   28.40
  -7   3   9  377.16   27.00
   6  -3  -9  185.78   24.70
  -6   3   9  159.68   21.30
  -6   3   9  199.98   23.70
   5  -3  -9  719.53   39.30
  -5   3   9  669.93   34.50
  -5   3   9  659.83   36.10
   4  -3  -9  425.76   29.30
  -4   3   9  468.05   29.30
  -4   3   9  407.06   31.40
   3  -3  -9   81.79   21.70
   3  -3  -9   97.39   20.50
   3  -3  -9   77.19   23.30
  -3   3   9   85.89   21.70
   2  -3  -9   43.30   21.70
   2  -3  -9   39.60   19.60
   2  -3  -9   -1.90   22.70
  -2   3   9   40.00   20.20
   1  -3  -9  143.29   21.30
   1  -3  -9  131.79   23.10
   1  -3  -9  139.19   24.70
  -1   3   9  175.98   23.00
   0  -3  -9    5.80   20.50
   0  -3  -9   39.30   19.20
   0  -3  -9   -8.50   22.50
   0   3   9  -38.50   20.00
  -1  -3  -9   -1.20   20.50
  -1  -3  -9   48.60   24.10
  -1  -3  -9   22.10   20.80
   1   3   9   22.40   21.10
  -2  -3  -9   27.90   20.80
  -2  -3  -9  -17.10   23.40
  -2  -3  -9   -1.60   20.90
   2   3   9  -34.30   20.90
  -3  -3  -9   74.59   26.30
  -3  -3  -9   65.59   21.90
  -3  -3  -9   88.09   22.40
   3   3   9   31.70   21.50
  -4  -3  -9   16.10   21.10
  -4  -3  -9    1.30   25.70
  -4  -3  -9  -12.80   21.50
   4   3   9    0.30   22.20
  -5  -3  -9    7.40   27.40
  -5  -3  -9   25.10   22.70
  -5  -3  -9  -16.10   21.30
   5   3   9    7.50   25.70
  -6  -3  -9  225.98   26.10
  -6  -3  -9  273.77   30.70
  -7  -3  -9  -14.10   27.50
  -7  -3  -9   25.70   24.10
  -8  -3  -9   26.30   28.70
  -8  -3  -9   -8.60   23.70
  -9  -3  -9  117.49   26.80
  -9  -3  -9   72.59   31.00
 -10  -3  -9   45.80   26.40
 -10  -3  -9   28.90   31.20
 -11  -3  -9  197.28   29.00
 -11  -3  -9  253.77   34.50
 -12  -3  -9  -38.50   30.70
 -12  -3  -9    7.60   27.90
 -13  -3  -9  -14.50   32.20
 -13  -3  -9   22.60   29.00
  16  -4  -9  121.39   42.00
  16  -4  -9   95.39   35.80
 -16   4   9   58.59   37.70
  15  -4  -9   29.90   38.30
  15  -4  -9   -3.00   32.70
 -15   4   9   44.30   34.30
  14  -4  -9   41.10   32.10
  14  -4  -9  -25.20   36.20
 -14   4   9  -12.90   32.10
  13  -4  -9  429.46   38.30
  13  -4  -9  514.85   44.20
 -13   4   9  463.25   40.20
  12  -4  -9   14.30   32.40
  12  -4  -9  -12.40   27.70
 -12   4   9   29.30   31.20
  11  -4  -9  -12.00   26.40
  11  -4  -9  -31.80   30.90
 -11   4   9  -47.80   28.20
  10  -4  -9  170.38   29.70
  10  -4  -9  225.08   35.00
 -10   4   9  218.68   31.40
   9  -4  -9   45.50   30.40
  -9   4   9   66.59   28.20
   8  -4  -9   32.10   29.10
  -8   4   9    5.90   25.40
   7  -4  -9   44.80   27.90
  -7   4   9   39.90   25.30
   6  -4  -9  154.08   29.50
  -6   4   9  147.99   25.90
   5  -4  -9   36.80   26.30
  -5   4   9   10.70   24.50
   4  -4  -9   27.00   25.80
  -4   4   9   -7.00   24.20
   3  -4  -9  187.78   27.10
  -3   4   9  189.08   26.10
   2  -4  -9   81.29   28.60
   2  -4  -9  148.79   27.30
  -2   4   9   91.19   25.00
   1  -4  -9   26.30   27.80
   1  -4  -9   25.50   24.40
   0  -4  -9  122.69   26.00
   0  -4  -9  105.99   29.90
   0  -4  -9  123.99   37.60
  -1  -4  -9  101.39   29.20
  -1  -4  -9   51.49   24.40
  -2  -4  -9   79.19   25.20
  -2  -4  -9   90.89   30.00
  -3  -4  -9   34.10   23.90
  -3  -4  -9    1.40   28.40
  -4  -4  -9  296.27   33.90
  -4  -4  -9  241.78   28.10
  -5  -4  -9   46.90   30.50
  -5  -4  -9   25.40   24.20
  -6  -4  -9    8.00   24.20
  -6  -4  -9   33.00   31.80
  -7  -4  -9  -28.50   29.10
  -7  -4  -9   24.50   24.60
  -8  -4  -9  209.68   33.80
  -8  -4  -9  145.39   27.10
  -9  -4  -9  -16.70   31.40
  -9  -4  -9  -17.90   24.50
 -10  -4  -9   26.30   26.20
 -10  -4  -9   28.60   32.90
 -11  -4  -9   42.00   33.60
 -11  -4  -9   -4.50   25.20
  13  -5  -9  -29.00   31.00
  13  -5  -9   65.49   39.30
  12  -5  -9   51.09   38.20
  11  -5  -9  118.99   38.00
  10  -5  -9   38.80   34.30
   9  -5  -9   44.30   33.70
   8  -5  -9   69.19   32.80
   7  -5  -9  -24.00   30.40
   6  -5  -9  -29.90   29.30
   5  -5  -9   47.20   29.50
   4  -5  -9   17.80   27.70
   3  -5  -9   18.00   28.60
   2  -5  -9   81.69   34.00
   2  -5  -9   51.39   27.70
   1  -5  -9  204.18   29.00
   1  -5  -9  173.58   34.70
   0  -5  -9  114.89   34.90
   0  -5  -9   68.89   27.30
  -1  -5  -9   20.70   25.60
  -1  -5  -9    3.20   32.10
  -2  -5  -9   69.09   26.50
  -2  -5  -9   51.09   32.50
  -3  -5  -9  -34.00   24.40
  -3  -5  -9  -11.40   32.80
  -4  -5  -9   13.00   32.40
  -4  -5  -9  -13.70   23.80
  -5  -5  -9   61.69   26.00
  -5  -5  -9   27.60   32.60
  -6  -5  -9   66.49   25.60
  -6  -5  -9  111.99   34.40
  -7  -5  -9   -0.40   25.10
  -7  -5  -9   12.60   34.50
  -8  -5  -9   15.10   33.20
  -8  -5  -9  -14.30   24.40
   8  -6  -9   56.29   35.00
   7  -6  -9    8.80   34.00
   6  -6  -9    2.00   31.60
   5  -6  -9   73.69   31.80
   4  -6  -9   55.09   31.00
   3  -6  -9   52.79   29.80
   2  -6  -9   11.50   28.00
   2  -6  -9   45.90   37.10
   1  -6  -9  -39.50   27.20
   1  -6  -9   90.09   38.30
   0  -6  -9  136.39   39.10
   0  -6  -9   95.29   28.30
  -1  -6  -9   42.20   36.20
  -1  -6  -9   42.70   27.30
  -2  -6  -9   15.70   26.20
  -2  -6  -9   48.40   35.50
  -3  -6  -9   35.60   26.60
  -3  -6  -9   -9.00   35.60
  -3  -6  10    1.50   22.80
  -2  -6  10  -27.80   24.70
  -1  -6  10   27.70   26.90
   0  -6  10   -6.60   27.50
   1  -6  10   -8.60   37.00
  -3  -5  10   45.50   20.40
  -2  -5  10   48.30   21.70
  -1  -5  10   88.09   24.30
   0  -5  10   -9.10   24.70
   1  -5  10   28.60   25.90
   1  -5  10  -16.80   19.30
   2  -5  10   30.70   22.00
   2  -5  10  109.59   28.50
   3  -5  10  279.47   27.00
   4  -5  10    2.10   25.30
   5  -5  10   37.00   27.30
   6  -5  10   28.90   27.90
   7  -5  10   63.39   29.80
  16   4 -10  129.99   32.20
 -16  -4  10  106.69   17.80
  15   4 -10   76.79   30.30
 -15  -4  10    8.90   15.20
  14   4 -10   -1.40   26.10
  13   4 -10  171.68   27.70
  12   4 -10    3.60   23.00
  -4  -4  10  -32.90   16.30
  -3  -4  10  187.88   19.90
  -2  -4  10   19.70   18.40
  -1  -4  10   14.00   14.10
  -1  -4  10   18.70   19.80
  -1  -4  10   30.00   15.90
   0  -4  10   58.89   15.70
   0  -4  10   21.90   20.80
   0  -4  10   37.20   18.40
   1  -4  10  152.98   23.70
   1  -4  10  139.39   17.70
   1  -4  10  100.69   20.90
   2  -4  10   54.89   21.60
   2  -4  10   37.20   23.00
   3  -4  10    2.50   24.00
   3  -4  10   -2.80   23.40
   4  -4  10   28.40   25.00
   5  -4  10   11.10   26.20
   6  -4  10  -17.60   27.00
   7  -4  10   31.00   29.70
   8  -4  10  210.68   33.50
   9  -4  10   -7.10   31.00
  10  -4  10   49.90   33.00
  11  -4  10   -3.80   34.80
 -18  -3  10   52.09   20.40
 -17  -3  10   15.60   18.80
 -16  -3  10   58.79   18.50
  15   3 -10   14.30   27.60
 -15  -3  10    3.60   16.80
  14   3 -10  248.98   30.80
 -14  -3  10  181.88   18.90
  13   3 -10   37.60   25.70
 -13  -3  10    6.60   14.90
  12   3 -10   41.90   24.10
 -12  -3  10   -1.60   13.80
  11   3 -10  100.09   24.00
 -11  -3  10   88.59   14.20
  10   3 -10  187.98   24.00
 -10  -3  10  125.19   14.10
   9   3 -10  159.98   21.00
  -6  -3  10   45.20   13.90
  -6  -3  10   22.20   12.20
  -5  -3  10   52.29   14.30
  -5  -3  10   60.29   13.00
  -4  -3  10   20.90   13.10
  -4  -3  10   -5.10   13.70
  -3  -3  10  501.25   23.50
  -3  -3  10  491.25   25.70
  -2  -3  10  386.76   25.70
  -2  -3  10  331.17   20.90
  -2  -3  10  355.16   20.90
  -2  -3  10  357.06   23.20
  -1  -3  10   46.60   14.00
  -1  -3  10   37.10   14.30
  -1  -3  10   43.90   17.00
  -1  -3  10   30.80   15.40
   0  -3  10    5.70   17.80
   0  -3  10   17.70   14.00
   0  -3  10   37.20   15.90
   1  -3  10   39.90   17.00
   1  -3  10   22.20   15.20
   1  -3  10    1.80   19.10
   2  -3  10  130.69   17.70
   2  -3  10  142.99   20.50
   2  -3  10  136.59   21.50
   3  -3  10   31.40   20.50
   3  -3  10   49.90   16.90
   3  -3  10   25.00   20.10
   4  -3  10   18.50   22.40
   4  -3  10   13.00   21.40
   5  -3  10  123.89   25.50
   6  -3  10  102.59   26.30
   7  -3  10  148.69   28.80
   8  -3  10  -63.59   27.70
   9  -3  10  -32.00   31.00
  13  -3  10   31.70   36.60
 -19  -2  10  108.59   24.00
 -19  -2  10   65.99   19.20
 -18  -2  10   16.30   17.00
 -18  -2  10    7.90   21.00
 -17  -2  10   84.79   21.00
 -17  -2  10   74.79   17.60
 -16  -2  10   92.89   20.20
 -16  -2  10   46.90   16.40
 -15  -2  10   -2.00   14.50
 -15  -2  10    6.80   18.00
 -15  -2  10    7.90   13.40
  14   2 -10   46.20   26.80
 -14  -2  10   83.69   14.90
 -14  -2  10  103.09   14.30
 -14  -2  10   47.80   18.20
  13   2 -10  -15.10   24.10
 -13  -2  10   23.50   14.50
 -13  -2  10   32.00   12.60
 -13  -2  10   -4.20   16.50
  12   2 -10    7.00   24.00
 -12  -2  10   19.20   13.60
 -12  -2  10   11.20   15.30
 -12  -2  10   15.40   11.50
  11   2 -10  -36.90   21.50
 -11  -2  10   -8.70   11.10
 -11  -2  10   12.30   12.90
 -11  -2  10  -10.80   14.00
  10   2 -10  551.94   35.80
 -10  -2  10  580.34   25.80
   9   2 -10   10.50   19.90
  -9  -2  10   15.60    9.80
  -9  -2  10    5.10   13.20
  -9  -2  10   29.60   12.70
   8   2 -10  352.66   24.10
  -8  -2  10  321.67   22.20
   7   2 -10  202.78   20.70
  -7  -2  10  151.98   15.80
  -7  -2  10  172.48   14.20
  -6  -2  10   39.50   13.90
  -6  -2  10    9.70   12.00
  -6  -2  10   19.20   11.30
  -6  -2  10   -0.30   13.40
  -5  -2  10  785.52   28.70
  -5  -2  10  798.22   28.90
  -5  -2  10  764.62   26.90
  -5  -2  10  840.22   27.00
  -4  -2  10  266.97   19.90
  -4  -2  10  283.87   21.70
  -4  -2  10  299.57   20.00
  -4  -2  10  279.27   22.20
  -3  -2  10 1834.02   48.40
  -3  -2  10 1832.82   49.20
  -3  -2  10 1747.93   48.90
  -3  -2  10 1883.71   48.70
  -2  -2  10  232.78   16.80
  -2  -2  10  245.28   17.90
  -2  -2  10  314.57   19.50
  -2  -2  10  282.87   18.00
  -1  -2  10   48.20   15.20
  -1  -2  10   38.90   15.40
  -1  -2  10   52.69   15.70
  -1  -2  10   30.80   12.60
   0   2 -10  263.77   19.30
   0  -2  10  239.58   19.50
   0  -2  10  217.28   18.90
   0  -2  10  239.98   18.60
   0  -2  10  211.78   16.70
  -1   2 -10  632.44   29.20
   1  -2  10  538.75   27.20
   1  -2  10  619.84   30.20
   1  -2  10  634.94   30.90
   1  -2  10  642.84   30.40
  -2   2 -10    8.60   16.40
   2  -2  10  -14.70   17.50
   2  -2  10  -14.20   16.70
   2  -2  10   14.80   14.40
   2  -2  10   23.90   18.20
  -3   2 -10  -10.70   16.80
   3  -2  10    5.10   17.80
   3  -2  10   24.70   19.00
  -4   2 -10  207.08   21.80
   4  -2  10  173.68   22.40
   4  -2  10  179.98   21.50
  -5   2 -10  181.18   22.70
   5  -2  10  188.68   23.90
   5  -2  10  211.68   23.10
  -6   2 -10   50.29   21.10
   6  -2  10   29.00   23.70
  -7   2 -10   -1.20   21.80
   7  -2  10  -23.90   25.40
  -8   2 -10   15.40   23.30
   8  -2  10  -53.99   26.30
  -9   2 -10   35.00   26.90
   9  -2  10   47.60   29.00
 -10   2 -10   17.70   28.80
  10  -2  10  -23.30   30.60
 -11   2 -10   50.99   31.10
  11  -2  10   45.10   33.80
 -12   2 -10  104.49   53.59
  12  -2  10   -9.90   32.80
  13  -2  10  113.79   37.90
  14  -2  10   66.59   37.00
 -20  -1  10   47.20   21.70
 -20  -1  10   82.29   25.30
 -19  -1  10  114.09   25.50
 -19  -1  10  138.29   22.50
 -18  -1  10  113.19   21.80
 -18  -1  10  110.49   24.10
 -17  -1  10  246.28   23.20
 -17  -1  10  205.98   24.80
 -16  -1  10  639.14   33.90
 -16  -1  10  652.03   37.00
 -15  -1  10  739.03   34.20
 -15  -1  10  724.83   36.20
  14   1 -10  -11.80   25.30
 -14  -1  10    8.20   18.50
 -14  -1  10  -12.90   15.90
  13   1 -10  346.47   30.30
 -13  -1  10  344.47   23.80
 -13  -1  10  299.37   21.40
  12   1 -10   14.00   23.00
 -12  -1  10   34.10   16.60
 -12  -1  10    3.80   12.60
 -12  -1  10   20.00   14.60
  11   1 -10   89.79   23.80
 -11  -1  10   95.39   17.00
 -11  -1  10   78.19   15.10
 -11  -1  10   95.09   14.40
  10   1 -10   49.90   21.30
 -10  -1  10   15.40   15.20
 -10  -1  10   37.90   14.50
 -10  -1  10   18.50   12.90
   9   1 -10  310.67   26.00
  -9  -1  10  295.77   19.90
  -9  -1  10  311.27   18.10
  -9  -1  10  308.97   23.20
   8   1 -10   10.60   18.60
  -8  -1  10   15.70   15.10
  -8  -1  10   22.20   13.00
  -8  -1  10    1.60   13.80
   7   1 -10   35.70   18.60
  -7  -1  10   53.19   14.00
  -7  -1  10   73.39   15.70
  -7  -1  10   54.79   15.40
  -6  -1  10  187.78   16.80
  -6  -1  10  189.88   17.70
  -6  -1  10  183.48   17.90
  -5  -1  10  205.08   17.60
  -5  -1  10  198.88   17.60
  -5  -1  10  188.38   16.80
  -5  -1  10  178.08   18.90
   4   1 -10   69.69   16.20
  -4  -1  10   63.79   15.00
  -4  -1  10   69.29   16.70
  -4  -1  10   66.79   15.10
  -4  -1  10   34.00   16.20
   3   1 -10   14.10   14.20
  -3  -1  10   -4.50   15.80
  -3  -1  10   10.80   14.60
  -3  -1  10   16.40   15.80
  -3  -1  10   18.10   14.90
   2   1 -10  174.88   17.20
  -2  -1  10  207.08   18.90
  -2  -1  10  198.98   18.30
  -2  -1  10  188.88   19.30
  -2  -1  10  171.78   17.00
   1   1 -10 1030.10   36.10
  -1  -1  10 1078.19   37.50
  -1  -1  10 1064.69   37.00
  -1  -1  10 1089.79   37.00
  -1  -1  10 1055.69   35.10
   0   1 -10  127.59   17.10
   0  -1  10  118.79   18.00
   0  -1  10   60.59   16.30
   0  -1  10   76.89   19.80
   0  -1  10   93.59   18.60
  -1   1 -10   50.99   16.50
   1  -1  10   41.20   18.10
   1  -1  10   14.10   15.40
   1  -1  10   -2.80   17.50
  -2   1 -10    8.80   17.60
   2  -1  10   -3.00   17.90
   2  -1  10   12.00   15.10
   2  -1  10   29.60   18.30
  -3   1 -10    6.80   17.30
   3  -1  10   -9.20   15.10
   3  -1  10   -3.90   18.90
   3  -1  10    0.20   18.40
  -4   1 -10   25.20   18.60
  -4   1 -10  -25.40   21.70
   4  -1  10  -26.70   19.30
   4  -1  10   10.40   19.60
   4  -1  10    7.30   18.30
  -5   1 -10   56.29   20.30
  -5   1 -10   48.30   20.50
   5  -1  10   40.40   21.20
  -6   1 -10  -11.70   20.50
  -6   1 -10   29.30   21.20
   6  -1  10   34.90   23.20
  -7   1 -10   -3.00   22.00
  -7   1 -10  -45.50   30.60
   7  -1  10    0.30   25.30
  -8   1 -10   21.80   24.00
   8  -1  10    1.40   25.80
  -9   1 -10    2.10   25.00
   9  -1  10   38.60   28.00
 -10   1 -10   69.89   27.40
  10  -1  10  112.19   32.00
 -11   1 -10   23.80   28.20
  11  -1  10   76.79   31.90
 -12   1 -10    6.40   30.90
  12  -1  10   -9.50   31.70
 -13   1 -10   17.40   33.50
  13  -1  10  -43.30   34.40
 -14   1 -10  -48.90   34.80
  14  -1  10   26.60   37.40
 -15   1 -10  133.29   40.60
  15  -1  10   94.09   42.00
 -20   0  10   60.69   25.90
 -20   0  10   59.49   25.40
 -19   0  10   -5.00   22.70
 -19   0  10  -28.30   23.60
 -18   0  10   39.20   23.00
 -18   0  10   68.59   23.00
 -17   0  10   13.30   21.10
 -17   0  10  -21.80   21.80
 -16   0  10   34.60   21.80
 -16   0  10   51.19   20.90
 -15   0  10    7.10   20.40
 -15   0  10   26.60   19.50
  14   0 -10   16.70   25.60
 -14   0  10   53.69   19.20
 -14   0  10   27.70   19.90
  13   0 -10  -41.30   23.50
 -13   0  10   31.00   18.90
 -13   0  10    4.30   17.70
  12   0 -10  624.24   39.60
  12   0 -10  540.85   31.50
 -12   0  10  634.34   28.60
 -12   0  10  594.64   31.90
 -12   0  10  587.64   31.90
  11   0 -10    5.30   22.70
  11   0 -10   17.20   16.50
 -11   0  10    6.60   14.00
 -11   0  10   -2.70   16.70
 -11   0  10   -2.80   16.10
  10   0 -10  378.36   25.50
  10   0 -10  356.76   27.70
 -10   0  10  365.26   27.50
 -10   0  10  314.87   24.10
 -10   0  10  342.87   26.10
   9   0 -10  -10.50   14.90
   9   0 -10   -8.50   19.90
  -9   0  10  -24.60   14.70
  -9   0  10    3.00   15.60
  -9   0  10   22.90   14.30
   8   0 -10 2395.56   68.09
   8   0 -10 2412.66   64.09
  -8   0  10 2452.35   64.89
  -8   0  10 2393.96   63.89
  -8   0  10 2422.36   64.59
   7   0 -10   -3.60   18.40
   7   0 -10  -18.80   14.90
  -7   0  10    5.20   15.20
  -7   0  10   29.40   16.50
  -7   0  10    3.00   16.20
   6   0 -10   81.89   16.90
  -6   0  10   65.79   20.50
  -6   0  10  122.79   18.80
  -6   0  10   86.59   17.70
   5   0 -10   22.80   15.60
  -5   0  10  -28.30   17.10
  -5   0  10   11.60   17.10
   4   0 -10  193.38   19.50
  -4   0  10  191.58   20.80
  -4   0  10  176.58   19.10
  -4   0  10  190.98   21.00
   3   0 -10   -6.50   15.80
  -3   0  10   -1.90   15.80
  -3   0  10  -16.10   17.50
  -3   0  10    1.80   17.80
   2   0 -10  661.73   31.50
  -2   0  10  640.74   30.10
  -2   0  10  644.24   31.70
  -2   0  10  685.73   33.50
   1   0 -10    9.00   16.30
   1   0 -10   15.40   19.50
  -1   0  10   12.30   18.40
  -1   0  10    6.30   15.20
  -1   0  10   -7.80   17.30
   0   0 -10   88.99   17.40
   0   0 -10   36.30   19.70
   0   0  10   95.99   19.50
   0   0  10   64.69   19.90
   0   0  10   50.69   16.00
  -1   0 -10  -32.10   19.60
  -1   0 -10   16.00   17.20
   1   0  10   16.10   19.50
   1   0  10  -18.20   18.30
  -2   0 -10  723.93   35.10
  -2   0 -10  673.63   33.80
   2   0  10  740.13   34.00
   2   0  10  689.23   34.40
  -3   0 -10   16.00   20.60
  -3   0 -10   -5.90   17.80
   3   0  10   32.60   20.00
   3   0  10   -5.10   18.70
  -4   0 -10  417.66   27.80
  -4   0 -10  396.36   31.80
   4   0  10  332.57   26.00
   4   0  10  357.36   26.30
  -5   0 -10   -0.50   19.80
  -5   0 -10  -11.60   21.10
   5   0  10   12.30   20.30
   5   0  10   21.50   21.30
  -6   0 -10  630.14   36.70
  -6   0 -10  650.83   38.00
   6   0  10  633.54   37.80
  -7   0 -10  -25.90   22.10
  -7   0 -10    4.00   23.60
   7   0  10   -3.70   24.00
  -8   0 -10  -44.90   24.10
  -8   0 -10   17.10   23.60
   8   0  10  -13.70   25.20
  -9   0 -10   -2.70   25.50
  -9   0 -10  -22.70   25.60
   9   0  10   29.20   27.10
 -10   0 -10   83.49   29.50
  10   0  10  192.68   33.10
 -11   0 -10   19.50   28.10
  11   0  10   24.90   31.30
 -12   0 -10    9.00   30.30
  12   0  10    3.30   30.90
 -13   0 -10    5.10   31.70
  13   0  10   43.70   34.90
 -14   0 -10   -4.80   33.80
 -15   0 -10  -76.19   34.80
 -20   1  10   41.70   28.10
 -20   1  10   30.50   28.40
 -19   1  10  112.59   28.70
 -19   1  10  158.28   28.70
  18  -1 -10   60.29   31.90
 -18   1  10  130.99   27.80
 -18   1  10   70.59   26.20
  17  -1 -10  174.38   32.80
 -17   1  10  281.77   29.70
 -17   1  10  270.57   29.50
  16  -1 -10  557.94   45.30
 -16   1  10  616.24   40.60
 -16   1  10  613.64   42.40
  15  -1 -10  603.44   45.50
 -15   1  10  718.43   39.60
 -15   1  10  799.72   41.80
  14  -1 -10  -31.80   25.50
  14  -1 -10   -4.70   22.00
 -14   1  10   29.10   20.70
 -14   1  10   36.20   21.80
  13  -1 -10  383.76   29.00
  13  -1 -10  366.86   33.30
 -13   1  10  397.46   28.30
 -13   1  10  386.26   28.20
  12  -1 -10   16.00   20.50
  12  -1 -10   16.50   25.10
 -12   1  10   24.30   19.80
 -12   1  10   37.90   20.10
  11  -1 -10   97.59   20.40
  11  -1 -10   78.09   24.10
 -11   1  10   77.69   20.30
 -11   1  10   72.89   20.60
  10  -1 -10   40.10   22.20
  10  -1 -10    7.30   17.30
 -10   1  10   31.20   18.00
 -10   1  10   26.70   18.00
   9  -1 -10  295.37   27.50
   9  -1 -10  324.87   23.40
  -9   1  10  314.27   23.50
  -9   1  10  311.77   24.10
   8  -1 -10   17.50   19.20
   8  -1 -10   12.50   16.50
  -8   1  10   15.80   17.10
  -8   1  10   31.70   17.80
   7  -1 -10   20.80   19.50
   7  -1 -10   76.39   18.10
  -7   1  10   65.79   18.30
  -7   1  10  102.89   19.00
   6  -1 -10  194.38   21.00
   6  -1 -10  212.58   20.70
  -6   1  10  169.18   21.40
  -6   1  10  214.98   20.80
   5  -1 -10  173.38   20.40
   5  -1 -10  162.08   21.10
  -5   1  10  148.39   20.10
  -5   1  10  193.38   21.30
   4  -1 -10   41.40   17.50
   4  -1 -10   73.09   20.20
  -4   1  10   78.69   19.20
  -4   1  10   64.99   19.20
   3  -1 -10   25.60   19.20
   3  -1 -10  -16.90   17.50
  -3   1  10   13.40   19.60
  -3   1  10   15.80   19.40
   2  -1 -10  177.48   22.20
   2  -1 -10  165.58   20.00
  -2   1  10  172.68   21.40
  -2   1  10  154.68   21.30
   1  -1 -10 1118.49   40.40
   1  -1 -10 1114.19   41.20
  -1   1  10 1053.19   41.10
  -1   1  10 1094.19   40.20
   0  -1 -10  108.09   19.60
   0  -1 -10  118.69   22.10
   0   1  10  119.39   21.10
   0   1  10  124.89   21.60
  -1  -1 -10   34.90   18.40
  -1  -1 -10   -8.20   20.70
   1   1  10   12.00   19.10
   1   1  10   18.20   19.80
  -2  -1 -10    8.20   17.10
  -2  -1 -10   39.00   21.10
   2   1  10    9.20   19.70
   2   1  10  -14.90   18.80
  -3  -1 -10    5.90   19.20
  -3  -1 -10    7.00   20.80
   3   1  10  -18.90   20.90
   3   1  10  -29.70   19.40
  -4  -1 -10    8.70   22.50
  -4  -1 -10   19.90   20.30
   4   1  10   12.40   21.70
   4   1  10   26.60   19.90
  -5  -1 -10   32.30   21.20
  -5  -1 -10   34.20   23.10
   5   1  10   82.59   21.80
   5   1  10   48.40   22.30
  -6  -1 -10    5.90   23.70
  -6  -1 -10   26.30   22.60
   6   1  10   37.00   22.10
   6   1  10   -5.70   23.80
  -7  -1 -10   13.00   22.70
  -7  -1 -10  -17.50   25.80
   7   1  10   -8.10   24.70
  -8  -1 -10  -31.90   23.90
  -8  -1 -10  -26.80   25.60
   8   1  10   45.30   26.30
  -9  -1 -10  -31.50   26.90
  -9  -1 -10  -11.20   25.50
   9   1  10   12.40   27.10
 -10  -1 -10   91.09   29.00
 -10  -1 -10   65.59   29.50
  10   1  10   46.50   29.30
 -11  -1 -10   47.00   29.80
 -11  -1 -10   64.39   29.30
  11   1  10   85.39   41.70
 -12  -1 -10   -3.50   30.30
 -12  -1 -10  -11.70   39.20
 -13  -1 -10  -78.59   29.70
 -14  -1 -10   61.89   33.70
 -15  -1 -10   40.60   35.90
  19  -2 -10   67.79   34.40
 -19   2  10  100.59   33.40
  18  -2 -10    5.00   32.50
 -18   2  10   17.50   30.10
  17  -2 -10  113.49   33.60
 -17   2  10  112.49   30.60
  16  -2 -10   85.39   31.70
 -16   2  10  138.79   30.80
  15  -2 -10  -11.70   27.90
  15  -2 -10   13.80   29.80
 -15   2  10   10.60   24.30
 -15   2  10   58.89   26.40
  14  -2 -10   83.99   29.00
  14  -2 -10   40.20   29.40
 -14   2  10   73.19   26.80
 -14   2  10   66.69   24.40
  13  -2 -10    2.00   26.10
  13  -2 -10    9.30   25.70
 -13   2  10   42.50   23.80
 -13   2  10   20.70   24.30
  12  -2 -10   15.20   25.90
  12  -2 -10   26.30   24.10
 -12   2  10    6.90   21.30
 -12   2  10   10.70   23.50
  11  -2 -10   11.50   22.20
  11  -2 -10  -19.30   24.00
 -11   2  10    1.90   21.70
 -11   2  10   20.30   20.20
  10  -2 -10  571.34   39.80
  10  -2 -10  628.94   37.90
 -10   2  10  602.34   36.30
 -10   2  10  542.55   36.10
   9  -2 -10   15.30   21.00
   9  -2 -10   44.80   21.30
  -9   2  10   18.40   19.70
  -9   2  10    7.70   20.20
   8  -2 -10  363.36   26.80
   8  -2 -10  388.16   28.70
  -8   2  10  341.07   25.80
  -8   2  10  400.16   26.50
   7  -2 -10  179.28   23.50
  -7   2  10  204.88   21.60
  -7   2  10  197.98   22.40
   6  -2 -10   -8.80   19.00
  -6   2  10   -1.70   19.50
  -6   2  10   22.30   18.80
   5  -2 -10  865.41   37.80
   5  -2 -10  838.32   39.40
  -5   2  10  849.61   37.50
  -5   2  10  886.91   38.80
   4  -2 -10  383.36   26.60
   4  -2 -10  329.17   24.40
  -4   2  10  335.87   24.30
  -4   2  10  328.57   25.40
   3  -2 -10 1932.41   57.59
   3  -2 -10 2001.70   58.49
  -3   2  10 1932.31   57.29
  -3   2  10 1848.92   55.99
   2  -2 -10  280.67   25.90
   2  -2 -10  262.27   23.70
  -2   2  10  286.27   24.90
  -2   2  10  305.87   23.50
   1  -2 -10   29.70   21.60
   1  -2 -10   50.99   20.20
  -1   2  10   64.29   20.60
  -1   2  10   70.39   20.40
   0  -2 -10  250.47   23.30
   0  -2 -10  226.28   24.70
   0   2  10  226.08   22.90
   0   2  10  218.88   24.40
  -1  -2 -10  653.23   37.10
  -1  -2 -10  721.83   35.90
   1   2  10  663.53   36.10
   1   2  10  656.63   34.90
  -2  -2 -10    7.90   20.40
  -2  -2 -10   19.40   23.60
   2   2  10   27.00   19.20
   2   2  10   42.20   21.00
  -3  -2 -10   -2.20   19.80
  -3  -2 -10   -7.50   23.90
   3   2  10   29.10   21.60
   3   2  10   33.10   22.40
  -4  -2 -10  168.68   24.20
  -4  -2 -10  203.08   24.60
  -4  -2 -10  234.58   27.90
   4   2  10  203.48   24.90
  -5  -2 -10  186.78   27.40
  -5  -2 -10  201.78   25.50
  -5  -2 -10  177.18   27.30
   5   2  10  249.38   26.70
  -6  -2 -10   19.30   26.40
  -6  -2 -10   15.10   23.40
   6   2  10  -21.70   24.30
  -7  -2 -10   -0.30   27.20
  -7  -2 -10  -34.20   24.00
   7   2  10    1.10   25.80
  -8  -2 -10   20.00   25.30
  -8  -2 -10  -38.00   28.40
   8   2  10   28.90   28.20
  -9  -2 -10   59.59   31.00
  -9  -2 -10   20.70   26.30
 -10  -2 -10   14.00   26.50
 -10  -2 -10   70.59   30.50
 -11  -2 -10   66.89   31.50
 -11  -2 -10   38.60   28.80
 -12  -2 -10  -10.10   29.90
 -12  -2 -10   -4.00   32.90
 -13  -2 -10   97.99   32.50
 -13  -2 -10   40.50   32.50
 -14  -2 -10  -40.20   31.50
  18  -3 -10  100.09   36.90
 -18   3  10  107.39   37.50
  17  -3 -10   19.90   43.20
  17  -3 -10  -15.20   31.20
 -17   3  10  -24.50   32.40
  16  -3 -10   64.19   32.40
  16  -3 -10   60.49   37.00
 -16   3  10   96.69   33.00
  15  -3 -10   12.80   30.80
  15  -3 -10  -33.20   32.70
 -15   3  10   23.60   30.60
  14  -3 -10  280.07   35.90
  14  -3 -10  295.97   37.50
 -14   3  10  197.38   33.70
  13  -3 -10   13.20   28.80
  13  -3 -10   60.99   32.10
 -13   3  10   -0.60   28.10
  12  -3 -10    5.00   27.20
  12  -3 -10   17.40   29.10
 -12   3  10   10.70   27.40
  11  -3 -10  112.59   28.90
  11  -3 -10  129.29   27.20
 -11   3  10  102.39   27.90
  10  -3 -10  144.69   28.80
  10  -3 -10  152.88   27.00
 -10   3  10  173.68   27.90
   9  -3 -10  168.08   27.00
   9  -3 -10  206.78   28.40
  -9   3  10  178.08   26.60
   8  -3 -10  168.18   27.50
  -8   3  10  205.28   26.00
  -8   3  10  146.89   23.40
   7  -3 -10 1129.49   49.40
  -7   3  10 1143.29   47.20
  -7   3  10 1138.39   45.40
   6  -3 -10   23.10   23.50
  -6   3  10   24.00   22.60
  -6   3  10   20.30   20.90
   5  -3 -10   53.39   23.30
  -5   3  10   26.40   20.90
  -5   3  10   76.99   23.80
   4  -3 -10   37.90   22.20
   4  -3 -10   12.40   23.90
  -4   3  10    9.40   19.60
  -4   3  10   23.00   22.90
   3  -3 -10  556.74   38.20
   3  -3 -10  581.94   37.20
  -3   3  10  598.74   39.60
  -3   3  10  607.24   35.50
   2  -3 -10  328.77   25.70
   2  -3 -10  359.76   29.00
   2  -3 -10  356.86   28.30
  -2   3  10  380.76   27.50
   1  -3 -10   30.20   20.40
   1  -3 -10   39.70   21.90
   1  -3 -10   16.80   24.50
  -1   3  10   39.90   22.90
   0  -3 -10   43.30   20.50
   0  -3 -10   14.70   22.00
   0  -3 -10    4.80   24.70
   0   3  10   34.20   22.00
  -1  -3 -10   27.60   22.20
  -1  -3 -10   44.90   21.80
  -1  -3 -10   21.00   26.40
   1   3  10   64.79   23.70
  -2  -3 -10  169.08   28.10
  -2  -3 -10  111.29   23.50
  -2  -3 -10  132.49   24.70
   2   3  10  140.59   25.60
  -3  -3 -10   25.00   28.80
  -3  -3 -10   40.70   27.90
  -3  -3 -10   22.00   23.30
   3   3  10   62.29   24.20
  -4  -3 -10    4.60   27.70
  -4  -3 -10    5.40   23.40
   4   3  10    7.60   24.70
  -5  -3 -10  103.19   30.70
  -5  -3 -10  103.19   25.50
  -6  -3 -10   79.59   25.70
  -6  -3 -10  105.99   29.90
  -7  -3 -10  128.69   27.30
  -7  -3 -10   85.29   30.60
  -8  -3 -10   47.90   25.70
  -8  -3 -10   17.60   30.50
  -9  -3 -10   -8.00   31.00
  -9  -3 -10   15.60   26.60
 -10  -3 -10   41.40   32.10
 -10  -3 -10    7.20   27.50
 -11  -3 -10   19.10   32.70
 -11  -3 -10   82.09   28.40
 -12  -3 -10   34.70   34.00
 -12  -3 -10   54.09   30.00
 -13  -3 -10    3.70   34.40
 -13  -3 -10  -16.80   30.30
  16  -4 -10  188.18   43.80
  16  -4 -10  178.48   36.90
 -16   4  10  176.48   39.10
  15  -4 -10   58.19   39.60
  15  -4 -10   78.69   33.20
 -15   4  10   30.30   36.00
  14  -4 -10   19.80   30.10
  14  -4 -10    3.40   36.30
 -14   4  10    3.20   34.00
  13  -4 -10  157.88   31.70
  13  -4 -10  237.38   38.70
 -13   4  10  236.38   36.90
  12  -4 -10  -46.60   33.30
  12  -4 -10  -54.19   26.80
 -12   4  10   25.70   30.80
  11  -4 -10  141.59   35.80
  11  -4 -10   80.89   29.50
 -11   4  10   95.39   31.30
  10  -4 -10   46.90   31.80
 -10   4  10  -13.80   28.90
   9  -4 -10  391.76   36.90
  -9   4  10  347.77   33.80
   8  -4 -10   41.70   30.40
  -8   4  10   84.29   27.80
   7  -4 -10   29.50   28.60
  -7   4  10  -31.60   25.10
   6  -4 -10   35.80   28.20
  -6   4  10   57.19   26.80
   5  -4 -10  196.98   30.60
  -5   4  10  241.88   30.20
   4  -4 -10  -14.90   26.00
  -4   4  10    6.20   25.90
   3  -4 -10  226.08   32.50
   3  -4 -10  207.98   30.00
  -3   4  10  176.18   27.70
   2  -4 -10   20.30   28.50
   2  -4 -10   11.10   25.90
   1  -4 -10   40.00   25.10
   1  -4 -10   52.89   30.00
   0  -4 -10   37.20   29.60
   0  -4 -10   13.10   25.40
  -1  -4 -10  149.39   27.30
  -1  -4 -10  199.28   32.40
  -2  -4 -10   42.30   25.60
  -2  -4 -10   38.90   31.10
  -3  -4 -10    0.70   24.70
  -3  -4 -10    6.70   29.80
  -4  -4 -10   26.40   25.30
  -4  -4 -10   -2.60   31.10
  -5  -4 -10   -8.30   31.20
  -5  -4 -10   49.60   26.40
  -6  -4 -10   -6.10   25.00
  -6  -4 -10    8.90   32.90
  -7  -4 -10   18.90   26.20
  -7  -4 -10   11.50   31.90
  -8  -4 -10  136.49   34.20
  -8  -4 -10  106.39   27.90
  -9  -4 -10  -21.70   32.80
  -9  -4 -10  -16.40   26.10
 -10  -4 -10   55.99   34.40
 -10  -4 -10   17.60   28.30
 -11  -4 -10    6.60   34.80
 -11  -4 -10   46.40   27.30
  13  -5 -10    7.60   40.10
  12  -5 -10   92.29   39.10
  11  -5 -10  211.78   40.10
  10  -5 -10   63.99   35.90
   9  -5 -10   38.20   34.50
   8  -5 -10   74.79   34.30
   7  -5 -10   47.30   32.30
   6  -5 -10  -56.99   30.40
   5  -5 -10    0.10   29.60
   4  -5 -10   -9.50   29.20
   3  -5 -10   91.79   31.30
   3  -5 -10   63.59   34.90
   2  -5 -10   39.10   28.60
   2  -5 -10    1.40   33.30
   1  -5 -10   98.69   35.00
   1  -5 -10  103.89   28.80
   0  -5 -10   27.20   27.20
   0  -5 -10    3.20   33.90
  -1  -5 -10   14.50   33.90
  -1  -5 -10   23.40   26.80
  -2  -5 -10   23.50   34.20
  -2  -5 -10   89.19   28.10
  -3  -5 -10  282.67   31.70
  -3  -5 -10  376.86   39.10
  -4  -5 -10    2.70   25.40
  -4  -5 -10  -28.30   33.90
  -5  -5 -10   -3.60   26.40
  -5  -5 -10   58.29   34.50
  -6  -5 -10   -2.50   26.10
  -6  -5 -10   24.10   35.00
  -7  -5 -10  114.59   36.60
  -7  -5 -10   25.90   26.80
   7  -6 -10  123.59   35.80
   6  -6 -10  -13.20   32.00
   5  -6 -10   38.90   32.70
   4  -6 -10   36.90   32.30
   3  -6 -10  -62.29   37.40
   3  -6 -10    1.90   30.30
   2  -6 -10   12.20   29.00
   2  -6 -10   27.10   38.20
   1  -6 -10   34.60   40.10
   1  -6 -10  -28.30   28.10
   0  -6 -10  -70.69   26.80
   0  -6 -10   47.90   37.60
  -1  -6 -10   13.60   27.60
  -1  -6 -10   26.30   37.40
  -3  -6  11  114.99   26.40
  -2  -6  11  -41.60   25.80
  -1  -6  11    3.70   27.10
  -4  -5  11   51.19   21.00
  -3  -5  11  -32.10   21.70
  -2  -5  11   -5.10   23.50
  -1  -5  11   16.40   24.00
   0  -5  11   20.30   15.90
   0  -5  11  -13.00   25.40
   1  -5  11   -3.10   26.20
   1  -5  11  -11.90   20.20
   2  -5  11   10.50   22.70
   3  -5  11   15.30   24.60
   4  -5  11   16.20   25.40
   5  -5  11  -15.50   26.20
   6  -5  11    9.00   28.40
  16   4 -11   57.19   30.90
 -16  -4  11   42.00   16.60
  15   4 -11    5.10   28.50
  14   4 -11   -5.90   26.00
  13   4 -11   63.59   25.80
  12   4 -11  203.88   25.70
  11   4 -11   22.10   21.20
  -5  -4  11   93.29   14.30
  -5  -4  11   78.69   18.10
  -4  -4  11   88.89   19.00
  -4  -4  11   86.59   15.10
  -3  -4  11   52.29   19.60
  -2  -4  11  108.59   21.60
  -1  -4  11   64.89   22.50
  -1  -4  11   74.09   14.80
  -1  -4  11  116.79   18.50
   0  -4  11    7.50   19.40
   0  -4  11   11.30   15.80
   0  -4  11   13.20   22.70
   1  -4  11   76.39   24.10
   1  -4  11    7.40   23.70
   1  -4  11   51.39   21.20
   2  -4  11   -4.10   22.30
   2  -4  11   15.20   24.90
   3  -4  11    3.20   27.20
   3  -4  11   11.30   23.80
   4  -4  11   22.00   25.20
   5  -4  11  552.84   42.50
   6  -4  11   45.80   28.70
   7  -4  11   92.99   30.80
   8  -4  11   -7.80   31.30
   9  -4  11   78.09   33.80
  10  -4  11   -1.70   34.10
  18   3 -11   81.29   33.20
 -18  -3  11    4.50   19.60
  17   3 -11  -19.20   30.40
 -17  -3  11    5.30   18.80
  16   3 -11   20.80   28.90
 -16  -3  11   33.60   18.40
  15   3 -11  -21.70   28.10
 -15  -3  11    3.30   16.80
  14   3 -11   55.69   28.10
 -14  -3  11   65.69   16.60
  13   3 -11   -5.80   25.30
 -13  -3  11   -6.40   14.90
  12   3 -11  133.09   26.40
 -12  -3  11  131.59   16.50
  11   3 -11   76.69   23.60
 -11  -3  11   53.99   15.00
  10   3 -11   15.80   20.60
 -10  -3  11    3.80   14.30
   9   3 -11   -7.10   19.60
  -9  -3  11   14.20   14.20
  -8  -3  11  189.18   16.30
  -7  -3  11   40.70   14.20
  -7  -3  11   71.49   16.50
  -6  -3  11  -30.00   15.00
  -6  -3  11    5.40   13.40
  -5  -3  11  134.49   15.20
  -5  -3  11  131.99   17.70
  -4  -3  11  273.27   20.00
  -4  -3  11  250.57   18.10
  -3  -3  11  228.38   17.80
  -3  -3  11  265.47   20.10
  -3  -3  11  287.97   20.00
  -3  -3  11  283.67   20.50
  -2  -3  11   39.10   15.60
  -2  -3  11   55.39   14.50
  -2  -3  11   92.19   15.40
  -2  -3  11   73.79   18.10
  -1  -3  11  293.47   22.90
  -1  -3  11  303.97   21.30
  -1  -3  11  289.77   22.20
  -1  -3  11  325.07   24.00
   0  -3  11   46.90   17.30
   0  -3  11   53.99   19.30
   0  -3  11   29.30   18.20
   0  -3  11   38.60   15.20
   1  -3  11   12.00   16.20
   1  -3  11    1.30   17.60
   1  -3  11    9.90   20.00
   2  -3  11    7.60   20.40
   2  -3  11   52.49   19.50
   2  -3  11   31.10   18.20
   3  -3  11  244.58   25.90
   3  -3  11  207.98   23.50
   4  -3  11    7.80   27.10
   4  -3  11   41.00   22.80
   5  -3  11  117.29   25.30
   6  -3  11   10.10   26.00
   7  -3  11   36.80   27.80
   8  -3  11  -20.70   29.30
   9  -3  11  169.48   34.00
  10  -3  11  141.69   35.30
  19   2 -11  -16.30   31.80
 -19  -2  11    3.90   17.70
 -19  -2  11    1.40   21.50
  18   2 -11  126.99   32.90
 -18  -2  11   91.29   22.80
 -18  -2  11  119.19   18.60
  17   2 -11  -19.00   29.40
 -17  -2  11   12.40   20.30
 -17  -2  11   12.40   16.00
  16   2 -11  261.47   33.60
 -16  -2  11  226.28   19.00
 -16  -2  11  215.08   23.30
  15   2 -11    0.40   27.30
 -15  -2  11   23.50   18.10
 -15  -2  11  -13.40   15.00
 -15  -2  11  -16.50   13.10
  14   2 -11   26.20   26.70
 -14  -2  11   14.70   17.10
 -14  -2  11   12.40   13.00
 -14  -2  11   25.30   15.20
  13   2 -11  235.58   29.90
 -13  -2  11  174.68   17.80
 -13  -2  11  220.68   16.30
 -13  -2  11  195.48   19.60
  12   2 -11  -11.00   23.40
 -12  -2  11    2.00   12.30
 -12  -2  11    9.70   16.10
 -12  -2  11    9.40   14.40
  11   2 -11  118.99   24.80
 -11  -2  11  133.69   16.40
 -11  -2  11  102.69   17.20
  10   2 -11   40.60   22.10
 -10  -2  11   35.40   11.50
 -10  -2  11   35.50   14.50
 -10  -2  11   56.89   15.90
   9   2 -11   24.00   19.40
  -9  -2  11   17.60   15.30
  -9  -2  11   -2.30   11.30
  -9  -2  11   -4.00   13.30
   8   2 -11  476.75   32.40
  -8  -2  11  475.55   23.60
  -8  -2  11  446.66   26.30
  -8  -2  11  471.75   21.20
  -7  -2  11  169.88   15.60
  -7  -2  11  170.18   14.10
  -7  -2  11  151.68   17.50
  -6  -2  11   39.70   15.00
  -6  -2  11   14.90   13.30
  -6  -2  11   31.40   13.20
  -6  -2  11   18.80   15.10
  -5  -2  11  103.99   15.70
  -5  -2  11  139.29   15.40
  -5  -2  11  138.19   14.70
  -5  -2  11  126.09   16.20
  -4  -2  11  184.08   16.30
  -4  -2  11  215.18   17.70
  -4  -2  11  193.28   18.00
  -4  -2  11  173.18   15.80
  -3  -2  11  478.25   26.30
  -3  -2  11  484.65   25.80
  -3  -2  11  479.95   24.10
  -3  -2  11  437.26   26.10
  -2  -2  11   19.00   15.10
  -2  -2  11   14.30   15.10
  -2  -2  11   34.40   16.00
  -2  -2  11    5.20   14.00
  -1  -2  11   53.89   15.50
  -1  -2  11   27.60   13.50
  -1  -2  11   31.80   16.50
  -1  -2  11   44.70   16.30
   0   2 -11  609.94   29.60
   0  -2  11  573.04   29.60
   0  -2  11  569.64   26.80
   0  -2  11  544.75   28.40
   0  -2  11  592.64   29.60
  -1   2 -11   -1.40   16.20
   1  -2  11   -1.20   17.00
   1  -2  11   25.20   17.70
   1  -2  11    0.10   14.40
   1  -2  11  -20.60   18.50
  -2   2 -11    4.70   17.80
   2  -2  11   -5.20   15.40
   2  -2  11  -28.70   17.50
   2  -2  11    4.30   19.60
   2  -2  11  -33.90   18.60
  -3   2 -11   56.89   20.00
   3  -2  11   46.00   19.00
   3  -2  11   70.49   21.20
  -4   2 -11   63.39   20.70
   4  -2  11   77.99   21.10
   4  -2  11  100.59   22.60
  -5   2 -11    1.20   21.10
   5  -2  11  -29.70   22.30
  -6   2 -11   34.80   22.70
   6  -2  11   -2.20   24.00
  -7   2 -11  -10.70   23.20
   7  -2  11   16.50   26.80
  -8   2 -11  100.49   26.00
   8  -2  11  121.09   29.80
  -9   2 -11  -12.50   28.40
   9  -2  11  -19.50   29.50
  10  -2  11  -13.90   31.10
  11  -2  11  179.18   38.10
  12  -2  11   20.70   35.20
  13  -2  11   12.00   36.40
 -20  -1  11  324.87   30.50
 -20  -1  11  249.48   25.80
  19   1 -11   59.29   32.80
 -19  -1  11   16.70   23.10
 -19  -1  11   75.39   21.70
  18   1 -11    6.10   30.20
 -18  -1  11   -3.80   18.50
 -18  -1  11   -3.90   21.40
  17   1 -11   82.39   30.80
 -17  -1  11  159.48   21.50
 -17  -1  11  126.79   24.00
  16   1 -11    9.40   27.90
 -16  -1  11   26.10   17.90
 -16  -1  11   45.70   20.70
  15   1 -11   40.60   27.70
 -15  -1  11   43.60   17.70
 -15  -1  11  104.79   21.60
  14   1 -11  344.47   33.10
 -14  -1  11  377.76   27.50
 -14  -1  11  343.07   24.90
  13   1 -11   40.00   25.80
 -13  -1  11   47.20   16.00
 -13  -1  11   30.00   14.70
 -13  -1  11    7.30   17.70
  12   1 -11  -14.60   23.40
 -12  -1  11   -2.10   13.20
 -12  -1  11   20.40   14.90
 -12  -1  11  -11.60   17.10
  11   1 -11    5.50   22.70
 -11  -1  11   13.90   17.10
 -11  -1  11    1.20   13.40
 -11  -1  11   24.40   15.20
  10   1 -11   98.19   23.20
 -10  -1  11  117.59   15.40
 -10  -1  11   81.69   16.20
 -10  -1  11   71.59   17.10
   9   1 -11  818.12   37.60
  -9  -1  11  801.52   31.30
  -9  -1  11  767.42   29.70
  -9  -1  11  778.62   33.00
   8   1 -11  385.36   30.90
  -8  -1  11  409.76   24.00
  -8  -1  11  435.56   25.90
  -8  -1  11  414.76   27.00
  -7  -1  11    0.80   16.40
  -7  -1  11   -1.70   14.00
  -7  -1  11   -9.70   15.50
  -6  -1  11  361.86   27.40
  -6  -1  11  387.56   24.40
  -6  -1  11  403.86   26.00
   5   1 -11  298.47   22.40
  -5  -1  11  261.97   19.20
  -5  -1  11  260.67   20.50
  -5  -1  11  312.87   20.10
  -5  -1  11  294.67   20.60
   4   1 -11  -13.30   14.60
  -4  -1  11    8.00   14.60
  -4  -1  11   -2.70   15.50
  -4  -1  11   12.30   14.30
  -4  -1  11   -1.80   16.00
   3   1 -11  510.95   26.30
  -3  -1  11  501.75   26.70
  -3  -1  11  478.35   28.20
  -3  -1  11  532.95   29.10
  -3  -1  11  509.85   26.70
   2   1 -11  211.98   18.20
  -2  -1  11  200.18   19.70
  -2  -1  11  179.38   17.40
  -2  -1  11  213.98   19.20
  -2  -1  11  220.28   20.60
   1   1 -11   69.29   16.60
  -1  -1  11   56.99   17.00
  -1  -1  11   69.79   17.60
  -1  -1  11   35.40   14.90
  -1  -1  11   18.40   17.90
   0   1 -11  481.05   28.10
   0  -1  11  461.45   29.30
   0  -1  11  479.05   27.70
   0  -1  11  486.75   29.80
  -1   1 -11  101.09   18.30
   1  -1  11   76.69   17.00
   1  -1  11  114.29   20.10
   1  -1  11  118.49   20.00
  -2   1 -11  672.33   33.10
   2  -1  11  627.84   31.20
   2  -1  11  738.13   34.00
   2  -1  11  698.93   35.30
  -3   1 -11   38.60   19.40
   3  -1  11   43.20   20.90
   3  -1  11   22.10   20.20
   3  -1  11   42.30   16.80
  -4   1 -11 1062.19   41.00
   4  -1  11  924.01   48.60
   4  -1  11 1049.30   42.70
   4  -1  11 1079.99   43.30
  -5   1 -11   16.90   22.30
  -5   1 -11   -8.70   20.50
   5  -1  11   24.90   23.00
  -6   1 -11   90.99   23.60
   6  -1  11   61.29   25.30
  -7   1 -11  271.37   28.30
   7  -1  11  214.28   29.90
  -8   1 -11  374.06   32.80
   8  -1  11  396.96   34.50
  -9   1 -11    2.50   27.00
   9  -1  11  -17.00   28.80
 -10   1 -11   -5.10   27.80
  10  -1  11   57.09   31.10
 -11   1 -11   24.80   29.80
  11  -1  11  -63.59   31.70
 -12   1 -11  106.49   34.20
  12  -1  11   42.30   35.30
 -13   1 -11   50.79   35.10
  13  -1  11   28.20   35.20
 -14   1 -11   17.30   37.10
  14  -1  11   54.89   38.20
  20   0 -11   19.50   32.30
 -20   0  11    4.70   25.40
 -20   0  11   30.20   24.40
  19   0 -11   20.10   32.50
 -19   0  11   13.50   23.80
 -19   0  11   -0.60   22.80
  18   0 -11    0.00   30.80
 -18   0  11  -25.30   21.20
 -18   0  11    7.40   23.00
  17   0 -11  112.79   30.60
 -17   0  11   88.99   23.00
 -17   0  11   90.39   24.50
  16   0 -11  -14.40   27.80
 -16   0  11  -14.80   20.00
 -16   0  11  -22.80   20.50
  15   0 -11  895.91   49.70
 -15   0  11  984.80   41.60
 -15   0  11  992.70   42.80
  14   0 -11   19.60   26.40
 -14   0  11   30.60   19.60
 -14   0  11   14.90   18.40
  13   0 -11 2016.90   68.59
 -13   0  11 2143.59   60.79
 -13   0  11 2071.89   62.59
  12   0 -11   -1.80   22.80
  12   0 -11   -6.50   17.10
 -12   0  11   18.50   17.20
 -12   0  11    7.00   18.30
 -12   0  11   30.00   21.40
  11   0 -11   11.00   22.90
  11   0 -11   12.60   16.30
 -11   0  11   11.00   16.20
 -11   0  11   19.10   18.40
 -11   0  11    6.90   14.70
  10   0 -11   16.70   16.30
  10   0 -11    0.00   21.40
 -10   0  11   13.50   14.80
 -10   0  11   -3.90   17.50
 -10   0  11   11.40   15.70
   9   0 -11  377.56   23.40
   9   0 -11  382.36   27.40
  -9   0  11  381.26   23.80
  -9   0  11  331.17   25.40
  -9   0  11  418.56   25.40
   8   0 -11  -30.10   18.50
   8   0 -11   15.70   15.90
  -8   0  11  -31.70   17.00
  -8   0  11   13.50   15.20
  -8   0  11  -10.20   16.10
   7   0 -11  465.75   28.00
   7   0 -11  461.35   32.70
  -7   0  11  497.95   30.30
  -7   0  11  455.25   29.10
  -7   0  11  441.36   28.60
   6   0 -11   15.70   15.80
  -6   0  11    7.30   17.20
  -6   0  11  -14.40   16.70
   5   0 -11   13.90   16.10
  -5   0  11   18.50   18.40
  -5   0  11   45.90   18.60
   4   0 -11  -10.20   16.20
  -4   0  11   14.00   15.40
  -4   0  11    7.90   18.30
  -4   0  11   -7.80   17.70
   3   0 -11  374.26   23.10
  -3   0  11  359.06   23.90
  -3   0  11  389.36   24.40
  -3   0  11  327.17   21.80
   2   0 -11  -12.00   16.60
  -2   0  11  -21.70   18.50
  -2   0  11  -13.40   14.80
  -2   0  11  -12.70   17.60
   1   0 -11  207.68   25.70
   1   0 -11  179.48   19.70
  -1   0  11  138.39   18.50
  -1   0  11  204.18   21.80
  -1   0  11  187.38   21.30
   0   0 -11   -1.20   16.20
   0   0 -11    3.50   19.40
   0   0  11   -7.50   18.90
   0   0  11   -9.80   19.00
   0   0  11  -15.00   15.50
  -1   0 -11   43.60   18.40
  -1   0 -11   87.69   21.50
   1   0  11  109.29   21.20
   1   0  11   52.19   20.30
  -2   0 -11  -19.30   19.60
  -2   0 -11    2.30   17.80
   2   0  11   -2.70   19.00
   2   0  11   25.40   20.10
  -3   0 -11  414.06   28.00
  -3   0 -11  418.06   32.20
   3   0  11  393.56   27.30
   3   0  11  428.56   31.60
  -4   0 -11    3.10   22.00
  -4   0 -11   14.80   20.20
   4   0  11   17.10   22.80
   4   0  11  -18.20   21.40
  -5   0 -11    6.40   22.60
  -5   0 -11   34.20   22.00
   5   0  11   36.80   23.40
   5   0  11    4.40   23.40
  -6   0 -11   -1.20   23.30
  -6   0 -11   20.70   22.80
   6   0  11   16.30   23.80
   6   0  11  -31.30   23.90
  -7   0 -11    8.00   24.30
  -7   0 -11  -31.70   25.20
   7   0  11  -44.30   26.20
  -8   0 -11    9.60   25.60
  -8   0 -11   31.30   28.50
   8   0  11    6.90   28.10
  -9   0 -11  -35.60   26.50
   9   0  11  -10.80   29.50
 -10   0 -11  -12.50   29.20
  10   0  11   31.30   31.30
 -11   0 -11   -4.50   30.10
  11   0  11   19.50   32.70
 -12   0 -11   -3.70   31.00
  12   0  11    8.70   33.80
 -13   0 -11  204.38   36.10
  13   0  11  185.38   60.69
 -14   0 -11  -28.80   34.50
  20  -1 -11  250.17   38.90
 -20   1  11  294.57   33.60
 -20   1  11  303.67   33.30
  19  -1 -11   54.19   32.50
 -19   1  11  141.39   28.40
 -19   1  11   55.19   27.40
  18  -1 -11   25.50   31.30
 -18   1  11   13.20   24.20
 -18   1  11    0.20   25.00
  17  -1 -11   95.59   31.20
 -17   1  11  159.58   26.60
 -17   1  11  129.09   26.60
  16  -1 -11   45.10   29.60
 -16   1  11   54.79   24.40
 -16   1  11   36.60   23.20
  15  -1 -11   50.99   29.40
 -15   1  11   97.49   24.30
 -15   1  11   51.59   23.60
  14  -1 -11  325.57   44.20
  14  -1 -11  302.97   34.30
 -14   1  11  396.06   30.10
 -14   1  11  405.56   31.10
  13  -1 -11   15.30   25.00
  13  -1 -11   48.20   22.20
 -13   1  11   37.00   21.30
 -13   1  11   31.20   22.90
  12  -1 -11    3.20   20.10
  12  -1 -11    1.90   24.50
 -12   1  11   23.90   20.70
 -12   1  11    4.50   19.80
  11  -1 -11   38.00   23.50
  11  -1 -11   14.10   18.60
 -11   1  11   10.00   19.60
 -11   1  11    4.90   19.50
  10  -1 -11   99.59   23.60
  10  -1 -11  121.29   20.90
 -10   1  11  130.59   21.30
 -10   1  11   98.69   19.80
   9  -1 -11  763.22   35.70
   9  -1 -11  758.62   38.80
  -9   1  11  767.02   38.00
  -9   1  11  800.52   35.90
   8  -1 -11  449.36   29.80
   8  -1 -11  389.96   33.50
  -8   1  11  434.26   31.30
  -8   1  11  457.75   32.10
   7  -1 -11   -5.40   17.80
   7  -1 -11   46.80   18.80
  -7   1  11    5.50   18.60
  -7   1  11   -0.30   18.90
   6  -1 -11  362.06   28.80
   6  -1 -11  400.16   28.60
  -6   1  11  430.86   26.50
  -6   1  11  450.75   26.20
   5  -1 -11  281.57   22.80
   5  -1 -11  286.37   22.70
  -5   1  11  318.87   24.30
  -5   1  11  250.37   23.80
   4  -1 -11   15.30   19.40
   4  -1 -11   -9.00   18.00
  -4   1  11    9.40   19.20
  -4   1  11   19.30   18.40
   3  -1 -11  528.05   32.40
   3  -1 -11  536.75   32.00
  -3   1  11  523.65   32.70
  -3   1  11  574.34   33.70
   2  -1 -11  173.98   22.70
   2  -1 -11  195.78   21.80
  -2   1  11  178.08   22.70
  -2   1  11  219.78   23.30
   1  -1 -11   47.40   19.00
   1  -1 -11   17.60   22.00
  -1   1  11   22.70   20.60
  -1   1  11   25.50   20.00
   0  -1 -11  511.95   32.30
   0  -1 -11  523.75   35.10
   0   1  11  493.75   31.90
   0   1  11  507.95   33.10
  -1  -1 -11  161.78   25.00
  -1  -1 -11  105.19   20.00
   1   1  11  134.79   21.00
   1   1  11  150.98   23.30
  -2  -1 -11  764.92   36.90
  -2  -1 -11  661.33   36.90
   2   1  11  707.03   36.00
   2   1  11  734.13   36.90
  -3  -1 -11   53.79   20.70
  -3  -1 -11   90.29   24.00
   3   1  11   41.20   20.70
   3   1  11   55.09   23.00
  -4  -1 -11 1114.39   46.10
  -4  -1 -11 1101.89   47.20
   4   1  11 1158.08   46.00
   4   1  11 1037.80   43.10
  -5  -1 -11   -1.20   22.40
  -5  -1 -11  -36.80   24.20
   5   1  11  -15.40   22.60
   5   1  11    0.20   24.50
  -6  -1 -11   41.40   26.10
  -6  -1 -11   24.60   24.60
   6   1  11   20.60   26.00
   6   1  11   28.00   29.50
  -7  -1 -11  225.38   28.30
  -7  -1 -11  303.57   31.30
   7   1  11  261.77   31.60
  -8  -1 -11  390.96   34.20
  -8  -1 -11  325.17   32.50
   8   1  11  394.66   34.60
  -9  -1 -11  -25.60   28.10
  -9  -1 -11   48.40   28.30
   9   1  11   57.69   29.80
 -10  -1 -11   -0.60   28.80
 -10  -1 -11  -18.60   30.00
  10   1  11  -12.80   30.80
 -11  -1 -11   33.10   31.40
 -12  -1 -11   85.89   33.50
 -13  -1 -11   49.80   32.90
 -14  -1 -11  -26.10   33.40
  19  -2 -11  -21.70   32.20
 -19   2  11   17.10   30.70
  18  -2 -11  101.39   34.80
 -18   2  11  136.59   32.90
  17  -2 -11  -21.20   31.50
 -17   2  11  -46.80   28.10
  16  -2 -11  227.88   34.80
 -16   2  11  374.96   35.20
  15  -2 -11  -10.90   28.00
  15  -2 -11  -45.40   28.30
 -15   2  11  -15.40   25.80
 -15   2  11   71.69   27.40
  14  -2 -11  -16.30   27.40
  14  -2 -11  -40.30   26.50
 -14   2  11   19.10   23.60
 -14   2  11  -24.40   24.90
  13  -2 -11  180.58   31.30
  13  -2 -11  207.68   29.90
 -13   2  11  260.97   29.80
 -13   2  11  256.37   28.70
  12  -2 -11  -29.40   25.60
  12  -2 -11   18.20   23.60
 -12   2  11   -3.10   22.80
 -12   2  11   12.50   23.10
  11  -2 -11  113.29   25.80
  11  -2 -11  120.99   25.00
 -11   2  11  140.09   25.00
 -11   2  11  125.99   25.00
  10  -2 -11   48.30   22.90
  10  -2 -11  101.69   23.90
 -10   2  11   61.99   22.70
 -10   2  11   12.70   21.80
   9  -2 -11   39.40   21.20
   9  -2 -11  -29.80   22.00
  -9   2  11  -40.60   20.10
  -9   2  11  -10.80   20.40
   8  -2 -11  458.95   34.80
  -8   2  11  471.85   35.40
  -8   2  11  495.95   34.00
   7  -2 -11  187.08   24.20
  -7   2  11  225.38   24.10
  -7   2  11  159.18   25.10
   6  -2 -11   27.40   22.00
   6  -2 -11    6.60   20.50
  -6   2  11   23.70   20.30
  -6   2  11   30.70   21.60
   5  -2 -11  140.19   21.90
   5  -2 -11  102.89   21.20
  -5   2  11  134.49   21.80
  -5   2  11  131.59   23.00
   4  -2 -11  245.78   23.90
   4  -2 -11  258.47   26.30
  -4   2  11  186.28   24.00
  -4   2  11  176.18   22.30
   3  -2 -11  494.55   35.10
   3  -2 -11  438.56   33.70
  -3   2  11  518.55   33.00
  -3   2  11  520.35   35.70
   2  -2 -11   14.30   19.90
   2  -2 -11   46.60   22.40
  -2   2  11   12.50   21.60
  -2   2  11   32.90   18.90
   1  -2 -11   64.79   22.20
   1  -2 -11   28.20   23.10
  -1   2  11   14.40   19.30
  -1   2  11   46.70   22.70
   0  -2 -11  665.83   38.10
   0  -2 -11  639.14   37.20
   0   2  11  707.83   35.00
   0   2  11  660.03   37.10
  -1  -2 -11    3.40   20.80
  -1  -2 -11   -5.90   23.70
   1   2  11   28.70   20.70
   1   2  11  -12.70   23.20
  -2  -2 -11    1.80   21.00
  -2  -2 -11    3.30   25.00
   2   2  11   -3.10   21.90
   2   2  11  -29.20   20.70
  -3  -2 -11   46.60   23.50
  -3  -2 -11   47.50   26.30
   3   2  11   91.09   24.60
   3   2  11   65.09   21.80
  -4  -2 -11   15.10   22.80
  -4  -2 -11   41.60   26.90
   4   2  11   66.09   24.10
  -5  -2 -11   48.00   24.70
  -5  -2 -11  -13.20   26.70
   5   2  11   -0.80   25.70
  -6  -2 -11   22.50   25.50
  -6  -2 -11   21.60   28.90
   6   2  11   76.09   28.30
  -7  -2 -11   -8.30   28.50
  -7  -2 -11   15.10   26.60
   7   2  11  -24.90   28.10
  -8  -2 -11   68.79   30.90
  -8  -2 -11  104.49   27.70
  -9  -2 -11    4.00   30.80
  -9  -2 -11   51.89   28.40
 -10  -2 -11  -56.59   30.10
 -10  -2 -11    6.60   29.20
 -11  -2 -11  244.18   34.30
 -11  -2 -11  166.18   35.10
 -12  -2 -11   -4.60   30.90
 -12  -2 -11  -18.50   34.20
 -13  -2 -11  -30.90   32.70
  18  -3 -11    7.70   33.50
 -18   3  11   27.60   35.60
  17  -3 -11   41.40   33.10
 -17   3  11   22.50   33.50
  16  -3 -11   21.40   32.80
  16  -3 -11  146.59   38.30
 -16   3  11   62.09   33.80
  15  -3 -11  -40.90   30.30
  15  -3 -11  -38.90   33.40
 -15   3  11   13.20   32.10
  14  -3 -11   85.59   31.40
  14  -3 -11  110.39   33.20
 -14   3  11   65.49   31.10
  13  -3 -11   16.80   28.50
  13  -3 -11   -5.10   29.80
 -13   3  11  -13.90   28.40
  12  -3 -11  182.18   32.10
  12  -3 -11  133.09   28.30
 -12   3  11   88.19   28.80
  11  -3 -11   65.49   27.00
  11  -3 -11   39.70   29.30
 -11   3  11  106.69   28.50
  10  -3 -11   -4.80   25.00
  10  -3 -11   32.20   26.90
 -10   3  11  -24.40   24.80
   9  -3 -11  -23.10   26.10
  -9   3  11    6.20   24.60
   8  -3 -11  180.28   28.70
  -8   3  11  263.17   28.50
   7  -3 -11   88.89   26.50
  -7   3  11   33.80   34.60
  -7   3  11   88.19   26.60
   6  -3 -11    3.50   24.00
  -6   3  11   10.50   24.70
  -6   3  11    9.10   25.00
   5  -3 -11  147.29   26.80
   5  -3 -11  169.18   27.50
  -5   3  11  168.58   27.30
  -5   3  11  152.28   24.80
   4  -3 -11  255.57   27.40
   4  -3 -11  259.17   27.60
  -4   3  11  249.38   27.20
  -4   3  11  299.07   29.00
   3  -3 -11  335.87   29.70
   3  -3 -11  303.27   29.60
  -3   3  11  271.67   27.70
   2  -3 -11  101.89   25.00
   2  -3 -11   77.99   23.30
  -2   3  11   56.39   24.70
   1  -3 -11  314.97   28.60
   1  -3 -11  285.07   30.20
  -1   3  11  320.17   29.50
   0  -3 -11   71.19   24.70
   0  -3 -11   61.49   27.90
   0   3  11   57.69   25.00
  -1  -3 -11   13.10   26.50
  -1  -3 -11  -29.60   23.40
   1   3  11   14.90   24.70
  -2  -3 -11    5.80   24.30
  -2  -3 -11   25.30   28.70
   2   3  11   32.80   25.60
  -3  -3 -11  256.17   32.70
  -3  -3 -11  222.48   28.70
   3   3  11  293.97   29.90
  -4  -3 -11   48.00   30.10
  -4  -3 -11   -1.70   25.40
   4   3  11   -8.50   35.80
  -5  -3 -11  108.59   27.00
  -5  -3 -11  130.39   32.00
  -6  -3 -11    6.00   30.20
  -6  -3 -11   -8.70   25.70
  -7  -3 -11   -3.20   26.90
  -7  -3 -11  -19.90   31.10
  -8  -3 -11  -43.20   31.30
  -8  -3 -11  -46.50   26.00
  -9  -3 -11  238.48   31.20
  -9  -3 -11  191.08   35.70
 -10  -3 -11   97.39   30.50
 -10  -3 -11  129.99   35.90
 -11  -3 -11  -13.30   33.60
 -11  -3 -11  -20.50   28.40
 -12  -3 -11  -39.30   33.70
 -12  -3 -11   -8.20   31.30
  16  -4 -11   74.29   40.60
  16  -4 -11   73.69   33.60
 -16   4  11  101.29   39.30
  15  -4 -11   -6.40   36.70
  15  -4 -11   29.60   31.10
 -15   4  11  -35.90   34.90
  14  -4 -11   56.39   30.80
  14  -4 -11  -13.80   36.60
 -14   4  11   -0.10   33.60
  13  -4 -11   98.09   38.00
  13  -4 -11  105.19   31.10
 -13   4  11   86.49   34.70
  12  -4 -11  146.99   32.20
  12  -4 -11  176.88   38.10
 -12   4  11  239.48   36.60
  11  -4 -11  -48.80   32.50
 -11   4  11   31.00   29.80
  10  -4 -11  120.79   34.80
 -10   4  11  130.49   31.30
   9  -4 -11  -28.50   30.60
  -9   4  11   13.90   28.80
   8  -4 -11   16.60   30.40
  -8   4  11  -13.80   27.20
   7  -4 -11   29.90   29.90
  -7   4  11   -8.50   27.90
   6  -4 -11   99.09   31.20
  -6   4  11  179.58   31.30
   5  -4 -11  117.59   29.90
  -5   4  11  170.68   31.00
   4  -4 -11  107.39   32.20
   4  -4 -11  148.89   29.80
  -4   4  11  133.09   29.20
   3  -4 -11  -14.70   28.40
   3  -4 -11   60.59   31.40
   2  -4 -11  130.89   29.70
   2  -4 -11  186.98   34.40
   1  -4 -11   66.09   27.80
   1  -4 -11   72.09   30.90
   0  -4 -11   34.30   30.90
   0  -4 -11   41.90   26.80
  -1  -4 -11   42.40   26.70
  -1  -4 -11   50.19   32.20
  -2  -4 -11   34.30   31.10
  -2  -4 -11  -14.80   26.90
  -3  -4 -11    7.50   32.30
  -3  -4 -11  -31.70   26.80
  -4  -4 -11  -12.70   26.30
  -4  -4 -11   10.00   32.50
  -5  -4 -11  466.95   34.80
  -5  -4 -11  423.16   39.90
  -6  -4 -11   18.80   27.20
  -6  -4 -11   36.80   34.00
  -7  -4 -11  122.59   34.50
  -7  -4 -11   48.50   28.30
  -8  -4 -11   -1.50   27.20
  -8  -4 -11   11.10   33.60
  -9  -4 -11  125.39   36.00
  -9  -4 -11   55.09   28.60
 -10  -4 -11    9.60   29.30
 -10  -4 -11   -1.30   35.70
  12  -5 -11    8.40   38.10
  11  -5 -11   29.90   38.00
  10  -5 -11  479.05   45.00
   9  -5 -11   -9.30   34.70
   8  -5 -11    1.40   33.40
   7  -5 -11  138.39   34.90
   6  -5 -11  -19.30   31.50
   5  -5 -11   64.49   31.60
   4  -5 -11  110.29   36.70
   4  -5 -11   89.49   33.10
   3  -5 -11   28.40   30.80
   3  -5 -11   65.19   35.90
   2  -5 -11   13.00   35.80
   2  -5 -11   11.60   28.90
   1  -5 -11  -29.00   33.90
   1  -5 -11   -5.90   29.00
   0  -5 -11  -52.19   27.90
   0  -5 -11   49.10   34.90
  -1  -5 -11   -7.90   28.00
  -1  -5 -11   -5.00   34.90
  -2  -5 -11   64.69   35.80
  -2  -5 -11   58.79   29.70
  -3  -5 -11   45.70   28.90
  -3  -5 -11   34.60   35.30
  -4  -5 -11   54.09   36.40
  -4  -5 -11  -39.40   26.80
  -5  -5 -11   95.99   37.00
  -5  -5 -11   19.50   26.70
  -6  -5 -11   41.80   36.90
  -6  -5 -11    6.10   26.90
   4  -6 -11   70.99   33.00
   4  -6 -11   22.90   40.70
   3  -6 -11   95.89   41.10
   3  -6 -11   76.89   32.40
   2  -6 -11  113.89   41.10
   2  -6 -11   24.40   31.50
   1  -6 -11  -33.60   28.70
   1  -6 -11    2.90   38.60
  -5  -5  12   17.00   20.70
  -4  -5  12   16.20   22.50
  -3  -5  12  -34.20   23.30
  -2  -5  12  -40.10   24.70
  -1  -5  12    6.10   26.80
   0  -5  12   35.10   28.00
   0  -5  12   30.40   19.50
   1  -5  12  -21.10   21.30
   1  -5  12   51.79   29.80
   2  -5  12   96.09   24.20
   3  -5  12   80.79   25.90
   4  -5  12   29.40   26.40
   5  -5  12   35.40   27.80
  15   4 -12   16.50   28.10
  14   4 -12   39.00   25.90
  13   4 -12  107.09   25.20
  12   4 -12  317.17   28.60
  -6  -4  12   -4.40   13.00
  -6  -4  12   25.60   19.20
  -5  -4  12   17.80   14.70
  -5  -4  12  -11.50   18.60
  -4  -4  12    4.30   15.30
  -4  -4  12  -27.40   18.90
  -3  -4  12   22.40   20.60
  -2  -4  12  384.06   27.20
  -2  -4  12  396.46   25.70
  -2  -4  12  342.37   23.90
  -1  -4  12   35.90   15.30
  -1  -4  12   25.50   18.80
  -1  -4  12   15.70   22.90
   0  -4  12  -18.50   16.40
   0  -4  12   18.10   23.80
   1  -4  12   50.29   25.20
   2  -4  12   46.10   26.90
   7  -4  12   55.99   30.80
   8  -4  12   51.29   32.80
   9  -4  12   43.10   33.40
  17   3 -12  168.08   34.70
 -17  -3  12  137.59   21.40
  16   3 -12   85.69   30.80
 -16  -3  12   15.00   18.10
  15   3 -12   57.29   29.00
 -15  -3  12   70.09   17.90
  14   3 -12   33.20   27.20
 -14  -3  12   53.79   17.60
  13   3 -12    5.20   25.10
 -13  -3  12   20.70   16.10
  12   3 -12   21.60   23.80
 -12  -3  12   -2.30   16.40
  11   3 -12   24.30   22.40
 -11  -3  12   21.00   15.90
  10   3 -12  101.79   23.50
 -10  -3  12   29.50   16.30
  -9  -3  12   22.00   16.10
  -8  -3  12    8.40   15.20
  -7  -3  12   21.00   15.10
  -7  -3  12  -15.20   17.30
  -6  -3  12  234.78   18.20
  -6  -3  12  297.87   21.60
  -5  -3  12  -23.10   15.40
  -5  -3  12  -14.80   17.90
  -4  -3  12  797.82   32.00
  -4  -3  12  857.01   34.30
  -4  -3  12  811.12   28.40
  -4  -3  12  844.82   29.50
  -3  -3  12  292.67   22.00
  -3  -3  12  298.27   22.70
  -3  -3  12  265.47   20.10
  -3  -3  12  291.07   22.40
  -2  -3  12   10.60   14.80
  -2  -3  12  -10.80   17.70
  -2  -3  12   27.40   16.80
  -2  -3  12   12.80   15.50
  -1  -3  12    9.40   17.80
  -1  -3  12   17.20   14.90
  -1  -3  12   13.50   16.50
  -1  -3  12   21.70   19.90
   0  -3  12  199.98   23.30
   0  -3  12  198.68   19.50
   0  -3  12  199.08   20.90
   0  -3  12  190.48   22.10
   1  -3  12   14.60   21.20
   1  -3  12   15.30   19.40
   1  -3  12    6.50   19.10
   2  -3  12   38.20   20.50
   2  -3  12   45.50   22.50
   3  -3  12   14.50   23.50
   3  -3  12  -26.40   21.20
   4  -3  12  -23.50   22.30
   5  -3  12   30.60   24.40
   6  -3  12  126.69   28.30
   7  -3  12  192.38   31.60
   8  -3  12   43.40   31.00
   9  -3  12  -62.39   32.20
  10  -3  12  -62.99   33.00
  11  -3  12   33.50   36.40
  19   2 -12    6.80   32.30
 -19  -2  12   19.40   21.90
 -19  -2  12   -0.10   17.00
  18   2 -12   73.79   32.40
 -18  -2  12   78.69   17.80
 -18  -2  12  108.79   22.70
  17   2 -12   10.30   30.10
 -17  -2  12   -3.40   16.30
 -17  -2  12  -26.90   19.30
  16   2 -12    9.90   29.60
 -16  -2  12   47.60   19.80
 -16  -2  12   51.89   17.10
  15   2 -12   34.50   28.90
 -15  -2  12   42.90   18.70
 -15  -2  12   45.20   20.60
 -15  -2  12   17.30   16.00
  14   2 -12  285.47   32.50
 -14  -2  12  327.37   23.00
 -14  -2  12  338.87   24.20
 -14  -2  12  334.87   25.80
  13   2 -12   13.50   26.30
 -13  -2  12    5.30   15.20
 -13  -2  12   -4.90   17.90
 -13  -2  12   23.40   13.40
  12   2 -12   46.70   25.10
 -12  -2  12   34.80   16.10
 -12  -2  12   43.60   17.60
  11   2 -12   28.00   23.10
 -11  -2  12   -4.40   15.50
 -11  -2  12  -13.40   16.90
 -11  -2  12    0.60   12.60
  10   2 -12   45.70   21.60
 -10  -2  12   63.49   13.20
 -10  -2  12   36.70   15.30
 -10  -2  12   39.10   17.50
   9   2 -12   91.69   22.60
  -9  -2  12   94.59   18.20
  -9  -2  12  113.49   16.60
  -9  -2  12  122.29   14.20
  -8  -2  12   70.39   13.80
  -8  -2  12   68.19   15.10
  -8  -2  12   74.19   16.90
  -7  -2  12   64.69   14.40
  -7  -2  12   61.39   17.10
  -7  -2  12   34.70   17.10
  -7  -2  12   58.29   14.90
  -6  -2  12  545.75   26.80
  -6  -2  12  528.25   28.60
  -6  -2  12  595.64   29.40
  -6  -2  12  573.54   26.00
  -5  -2  12   81.49   15.70
  -5  -2  12   72.99   16.20
  -5  -2  12   79.79   15.20
  -5  -2  12   63.59   16.70
  -4  -2  12   29.30   14.80
  -4  -2  12   36.90   16.50
  -4  -2  12   13.20   16.30
  -4  -2  12   49.20   15.30
  -3  -2  12   58.29   17.60
  -3  -2  12   25.50   17.30
  -3  -2  12   27.80   15.90
  -3  -2  12   41.80   14.90
  -2  -2  12  266.17   20.10
  -2  -2  12  267.87   20.10
  -2  -2  12  273.87   21.00
  -2  -2  12  217.18   18.60
   1   2 -12   37.40   18.50
  -1  -2  12   82.49   15.50
  -1  -2  12   39.70   17.60
  -1  -2  12   33.50   18.70
  -1  -2  12   33.30   17.70
   0   2 -12  169.38   20.60
   0  -2  12  168.88   18.40
   0  -2  12  174.08   19.20
   0  -2  12  196.78   20.40
   0  -2  12  151.38   20.40
  -1   2 -12   45.40   18.70
   1  -2  12   18.10   20.60
   1  -2  12   30.60   19.20
   1  -2  12    6.00   16.80
   1  -2  12   22.90   15.50
  -2   2 -12   54.19   19.60
   2  -2  12   92.49   20.40
   2  -2  12   45.60   21.00
   2  -2  12   78.19   23.10
   2  -2  12   52.89   19.90
  -3   2 -12   60.79   21.50
   3  -2  12   30.10   20.20
   3  -2  12   85.59   23.00
   3  -2  12   71.09   24.50
  -4   2 -12  122.69   23.10
   4  -2  12  147.79   25.10
  -5   2 -12   53.69   23.80
   5  -2  12   75.79   25.10
  -6   2 -12  198.08   34.20
   6  -2  12  250.77   29.00
   7  -2  12   22.90   27.90
   8  -2  12    6.20   30.10
   9  -2  12   15.70   31.30
  10  -2  12   69.59   33.20
  11  -2  12  227.28   39.30
  12  -2  12  -18.80   36.80
  19   1 -12  105.09   33.50
 -19  -1  12  147.79   22.20
 -19  -1  12  139.89   25.70
  18   1 -12   42.90   31.70
 -18  -1  12  -11.20   18.70
 -18  -1  12   13.90   22.20
  17   1 -12    9.30   30.50
 -17  -1  12  -16.80   20.60
 -17  -1  12   20.30   18.90
  16   1 -12   40.70   29.60
 -16  -1  12  -11.60   16.90
 -16  -1  12   22.20   20.50
  15   1 -12  -38.20   28.30
 -15  -1  12  -25.50   19.00
 -15  -1  12  -27.00   15.80
  14   1 -12  109.79   28.20
 -14  -1  12  136.89   21.80
 -14  -1  12  101.39   18.00
  13   1 -12  354.16   32.40
 -13  -1  12  415.16   27.10
 -13  -1  12  315.47   22.70
  12   1 -12  340.37   31.70
 -12  -1  12  349.37   23.00
 -12  -1  12  386.76   25.80
 -12  -1  12  374.46   22.20
  11   1 -12 1091.59   47.40
 -11  -1  12 1103.29   39.10
 -11  -1  12 1072.79   40.60
 -11  -1  12 1103.59   37.50
  10   1 -12  197.48   25.20
 -10  -1  12  258.67   22.90
 -10  -1  12  227.88   18.70
 -10  -1  12  250.07   20.00
   9   1 -12  106.89   22.20
  -9  -1  12   78.69   16.00
  -9  -1  12  123.59   19.40
  -9  -1  12  140.59   18.10
  -8  -1  12   30.50   15.20
  -8  -1  12   -1.20   17.40
  -8  -1  12   10.30   16.80
  -7  -1  12   -5.80   14.90
  -7  -1  12   -6.30   15.60
  -7  -1  12   10.30   17.10
  -6  -1  12  186.28   18.90
  -6  -1  12  173.98   17.70
  -6  -1  12  193.28   20.50
  -6  -1  12  183.48   18.90
   5   1 -12  353.96   26.10
  -5  -1  12  370.66   23.30
  -5  -1  12  369.66   23.20
  -5  -1  12  358.86   25.50
  -5  -1  12  345.57   26.40
   4   1 -12  122.29   17.30
  -4  -1  12   94.09   16.50
  -4  -1  12   84.09   18.60
  -4  -1  12  107.99   16.90
  -4  -1  12  106.19   18.20
   3   1 -12   58.09   15.80
  -3  -1  12   57.99   15.80
  -3  -1  12   43.50   15.90
  -3  -1  12    9.50   17.00
  -3  -1  12   19.20   18.40
   2   1 -12   17.40   15.40
  -2  -1  12   36.70   18.00
  -2  -1  12   36.50   18.10
  -2  -1  12   33.20   16.20
  -2  -1  12   32.90   15.00
   1   1 -12  672.63   31.60
  -1  -1  12  686.63   32.00
  -1  -1  12  657.03   31.00
  -1  -1  12  653.03   33.00
  -1  -1  12  567.94   35.40
   0   1 -12  222.78   20.90
   0  -1  12  236.78   22.00
   0  -1  12  167.58   20.20
   0  -1  12  220.38   22.60
  -1   1 -12  233.78   21.70
   1  -1  12  247.08   23.50
   1  -1  12  240.88   23.30
   1  -1  12  194.18   20.40
  -2   1 -12  -10.60   18.80
   2  -1  12  -12.20   20.70
   2  -1  12    1.30   20.60
   2  -1  12  -15.90   16.80
  -3   1 -12   55.79   21.10
   3  -1  12   49.40   19.10
   3  -1  12   81.59   22.20
   3  -1  12   10.00   22.30
  -4   1 -12   46.90   21.80
   4  -1  12   16.50   23.20
   4  -1  12   23.10   24.70
  -5   1 -12   -8.00   22.40
   5  -1  12   39.90   24.70
  -6   1 -12  -18.30   23.60
   6  -1  12   69.99   27.50
  -7   1 -12  -19.90   25.10
   7  -1  12  -18.20   28.70
  -8   1 -12   93.29   29.10
   8  -1  12   36.60   29.60
  -9   1 -12   12.00   28.30
   9  -1  12    8.10   31.40
 -10   1 -12    1.20   29.60
  10  -1  12   83.29   32.60
 -11   1 -12   -4.00   31.60
  11  -1  12  -45.40   33.60
 -12   1 -12    2.30   33.40
  12  -1  12   40.00   35.10
 -13   1 -12  101.29   37.50
  13  -1  12   10.40   35.80
  20   0 -12  149.99   36.50
 -20   0  12  155.68   26.60
 -20   0  12  180.48   28.40
  19   0 -12   14.10   32.20
 -19   0  12    5.80   23.60
 -19   0  12    1.30   22.50
  18   0 -12  270.47   36.50
 -18   0  12  266.77   27.10
 -18   0  12  325.27   29.70
  17   0 -12   -2.10   30.20
 -17   0  12  -39.20   21.50
 -17   0  12    1.60   20.90
  16   0 -12  962.90   52.99
 -16   0  12  960.30   44.70
 -16   0  12 1017.30   43.20
  15   0 -12    3.60   28.20
 -15   0  12   11.30   19.40
 -15   0  12   61.69   22.70
  14   0 -12  257.57   32.30
 -14   0  12  298.37   24.80
 -14   0  12  285.67   26.70
  13   0 -12   12.90   26.10
 -13   0  12   23.00   17.90
 -13   0  12    1.00   20.80
  12   0 -12   96.99   26.60
 -12   0  12   72.89   21.50
 -12   0  12   88.19   18.60
  11   0 -12    2.90   22.80
  11   0 -12   -7.70   17.10
 -11   0  12    4.80   19.30
 -11   0  12  -14.50   15.30
 -11   0  12   16.70   16.60
  10   0 -12  896.01   43.00
  10   0 -12  971.00   38.00
 -10   0  12  993.90   36.60
 -10   0  12  982.80   40.50
 -10   0  12 1007.60   39.00
   9   0 -12    7.40   17.00
   9   0 -12   -0.70   20.10
  -9   0  12    6.60   15.70
  -9   0  12   24.50   17.30
  -9   0  12    9.00   18.90
   8   0 -12  178.68   19.70
   8   0 -12  139.19   22.70
  -8   0  12  172.98   20.20
  -8   0  12  136.09   19.30
  -8   0  12  168.38   22.10
   7   0 -12  -16.30   16.20
  -7   0  12   25.50   18.50
  -7   0  12   -7.90   17.30
   6   0 -12   41.90   17.30
  -6   0  12   66.39   19.50
  -6   0  12   57.59   20.20
   5   0 -12    9.20   16.80
  -5   0  12  -14.90   18.10
  -5   0  12   11.60   18.70
   4   0 -12   12.20   16.60
  -4   0  12   12.50   18.50
  -4   0  12   16.90   16.30
  -4   0  12   -1.10   18.90
   3   0 -12   18.30   17.40
  -3   0  12  -40.30   17.80
  -3   0  12    8.90   19.60
  -3   0  12   -3.30   16.00
   2   0 -12  679.53   32.90
  -2   0  12  651.23   30.90
  -2   0  12  708.93   34.70
  -2   0  12  660.13   33.90
   1   0 -12   -4.80   17.10
  -1   0  12  -22.40   19.60
  -1   0  12   36.90   19.00
  -1   0  12    8.20   15.20
   0   0 -12 1064.89   42.20
   0   0 -12 1070.69   39.90
   0   0  12 1132.69   42.00
   0   0  12 1070.99   41.40
  -1   0 -12   17.80   18.90
  -1   0 -12  -25.50   20.90
   1   0  12   -3.90   20.80
   1   0  12  -11.50   20.30
  -2   0 -12   -2.10   19.40
  -2   0 -12    8.80   21.80
   2   0  12   42.90   21.10
   2   0  12   -1.00   21.40
  -3   0 -12   16.30   20.50
  -3   0 -12    2.50   22.30
   3   0  12   -3.30   22.10
   3   0  12   -6.20   22.70
  -4   0 -12 1003.90   44.70
  -4   0 -12 1001.10   43.80
   4   0  12  965.40   43.30
   4   0  12  996.80   44.70
  -5   0 -12   10.30   23.70
  -5   0 -12    9.30   24.60
   5   0  12   51.19   26.20
   5   0  12  -29.80   23.40
  -6   0 -12  457.75   34.50
  -6   0 -12  479.05   32.70
   6   0  12  420.86   32.30
   6   0  12  540.55   42.60
  -7   0 -12  -25.90   25.70
   7   0  12  -61.99   26.40
  -8   0 -12   31.70   27.50
   8   0  12   35.50   29.90
  -9   0 -12  -30.10   27.70
   9   0  12  -21.50   31.70
 -10   0 -12  291.87   35.70
  10   0  12  330.97   38.40
 -11   0 -12   20.10   32.30
  11   0  12  -29.40   32.90
 -12   0 -12   42.80   34.00
  12   0  12   31.30   35.00
 -13   0 -12    5.30   34.90
  19  -1 -12  139.19   34.60
 -19   1  12  181.58   30.10
 -19   1  12  146.79   28.20
  18  -1 -12    8.80   31.30
 -18   1  12   19.60   25.70
 -18   1  12    3.60   25.40
  17  -1 -12    4.90   30.90
 -17   1  12    4.90   25.30
 -17   1  12   -6.30   24.60
  16  -1 -12   27.40   29.40
 -16   1  12    0.90   24.70
 -16   1  12   24.50   24.20
  15  -1 -12   -9.60   26.70
 -15   1  12   11.90   24.40
 -15   1  12   -5.90   22.10
  14  -1 -12  131.09   29.90
 -14   1  12   83.29   23.70
 -14   1  12  140.99   25.60
  13  -1 -12  324.07   32.90
  13  -1 -12  292.27   27.50
 -13   1  12  379.76   30.70
 -13   1  12  343.27   28.90
  12  -1 -12  334.47   32.30
  12  -1 -12  350.66   28.20
 -12   1  12  367.96   29.70
 -12   1  12  362.76   27.90
  11  -1 -12 1062.69   44.50
  11  -1 -12 1115.19   48.40
 -11   1  12 1092.39   43.50
 -11   1  12 1140.79   46.10
  10  -1 -12  256.77   26.50
  10  -1 -12  218.48   23.70
 -10   1  12  236.68   23.40
 -10   1  12  207.28   26.10
   9  -1 -12  179.28   25.40
   9  -1 -12  128.99   21.60
  -9   1  12  151.48   22.70
  -9   1  12  182.78   23.20
   8  -1 -12   19.90   19.50
  -8   1  12    5.90   20.30
  -8   1  12   18.80   19.80
   7  -1 -12  -19.00   19.40
   7  -1 -12   -3.40   17.90
  -7   1  12   -2.60   19.40
  -7   1  12   10.90   19.40
   6  -1 -12  207.68   22.10
   6  -1 -12  135.39   19.50
  -6   1  12  183.38   22.40
  -6   1  12  156.58   23.00
   5  -1 -12  370.06   25.00
   5  -1 -12  353.86   25.50
  -5   1  12  344.07   25.90
  -5   1  12  308.77   25.20
   4  -1 -12  125.99   21.80
   4  -1 -12  125.29   21.00
  -4   1  12  143.69   21.20
  -4   1  12   59.99   22.20
   3  -1 -12   72.49   19.50
   3  -1 -12   38.80   20.90
  -3   1  12   73.79   19.60
  -3   1  12   31.30   21.00
   2  -1 -12   33.20   20.20
   2  -1 -12   34.80   22.00
  -2   1  12   16.40   18.90
  -2   1  12   26.30   21.30
   1  -1 -12  727.13   38.30
   1  -1 -12  656.03   35.40
  -1   1  12  673.23   34.80
  -1   1  12  701.23   37.40
   0  -1 -12  248.98   25.30
   0  -1 -12  212.38   23.30
   0   1  12  219.78   25.10
   0   1  12  223.18   23.60
  -1  -1 -12  216.28   25.50
  -1  -1 -12  191.88   22.70
   1   1  12  193.58   23.30
   1   1  12  212.48   25.60
  -2  -1 -12   -1.90   21.40
  -2  -1 -12  -17.40   22.60
   2   1  12  -21.10   21.50
   2   1  12   15.50   22.20
  -3  -1 -12   55.39   22.60
  -3  -1 -12   28.00   24.40
   3   1  12   26.90   24.90
   3   1  12   70.59   22.90
  -4  -1 -12   48.40   24.10
  -4  -1 -12   18.80   25.90
   4   1  12   10.90   25.30
   4   1  12   33.80   23.10
  -5  -1 -12   63.89   27.00
  -5  -1 -12   17.40   24.60
   5   1  12   23.20   24.80
   5   1  12   38.50   26.10
  -6  -1 -12   63.49   26.80
  -6  -1 -12   15.30   27.90
   6   1  12   20.70   28.70
  -7  -1 -12   -3.70   26.60
  -7  -1 -12   15.20   29.10
   7   1  12    9.80   30.40
  -8  -1 -12   61.79   29.20
  -8  -1 -12   75.39   29.50
   8   1  12   72.69   30.90
  -9  -1 -12   -1.10   29.40
   9   1  12  -27.80   31.30
 -10  -1 -12   98.29   30.70
  10   1  12   46.80   34.00
 -11  -1 -12   38.70   33.60
 -12  -1 -12   -5.60   33.90
 -13  -1 -12   24.80   35.20
  19  -2 -12   -7.10   33.20
 -19   2  12   11.90   31.60
  18  -2 -12   64.89   32.70
 -18   2  12  139.19   32.90
  17  -2 -12    0.10   30.60
 -17   2  12   21.20   30.10
  16  -2 -12   50.09   31.60
 -16   2  12   68.79   29.50
  15  -2 -12   31.30   30.20
 -15   2  12    9.30   26.50
 -15   2  12   18.30   26.20
  14  -2 -12  353.26   37.20
  14  -2 -12  363.56   35.20
 -14   2  12  390.16   34.10
 -14   2  12  401.76   33.90
  13  -2 -12  -11.60   27.00
  13  -2 -12   -3.40   25.10
 -13   2  12    7.00   25.00
 -13   2  12    2.40   24.50
  12  -2 -12   21.80   26.00
  12  -2 -12   25.80   25.50
 -12   2  12   26.80   24.30
 -12   2  12   76.59   26.00
  11  -2 -12   27.80   24.50
  11  -2 -12    9.50   24.30
 -11   2  12   21.80   24.90
 -11   2  12   -4.30   23.00
  10  -2 -12   59.09   24.60
  10  -2 -12   87.19   24.90
 -10   2  12   49.30   23.50
 -10   2  12   33.80   23.10
   9  -2 -12   78.79   24.60
  -9   2  12   94.99   23.70
  -9   2  12   64.59   23.40
   8  -2 -12   83.99   23.50
  -8   2  12  125.69   24.00
  -8   2  12   81.69   24.60
   7  -2 -12  105.99   23.00
   7  -2 -12   55.99   22.80
  -7   2  12   39.40   23.30
  -7   2  12   63.99   22.00
   6  -2 -12  583.34   37.00
   6  -2 -12  571.84   38.10
  -6   2  12  566.24   38.00
  -6   2  12  652.63   38.40
   5  -2 -12   59.49   21.80
   5  -2 -12   93.99   25.00
  -5   2  12  105.49   23.30
  -5   2  12   84.09   21.90
   4  -2 -12   52.79   22.40
   4  -2 -12   29.50   18.90
  -4   2  12   46.70   22.60
  -4   2  12   17.60   21.50
   3  -2 -12   51.79   23.70
   3  -2 -12   10.60   21.80
  -3   2  12   16.60   22.90
  -3   2  12   17.40   20.90
   2  -2 -12  271.17   26.40
   2  -2 -12  319.67   29.20
  -2   2  12  342.17   28.30
  -2   2  12  301.37   26.40
   1  -2 -12   57.59   23.00
   1  -2 -12   89.49   25.10
  -1   2  12   89.39   25.00
  -1   2  12   93.59   20.60
   0  -2 -12  188.48   25.20
   0  -2 -12  208.78   28.10
   0   2  12  200.68   24.10
   0   2  12  203.88   27.00
  -1  -2 -12   26.90   23.20
  -1  -2 -12  -22.80   25.00
   1   2  12   12.90   23.90
   1   2  12   58.59   22.70
  -2  -2 -12   98.79   28.60
  -2  -2 -12  107.79   24.50
   2   2  12  103.39   25.40
   2   2  12   92.89   24.30
  -3  -2 -12  140.59   29.90
  -3  -2 -12   60.99   24.50
   3   2  12   76.69   26.80
  -4  -2 -12  117.59   27.20
  -4  -2 -12  140.69   29.30
   4   2  12  115.19   28.70
  -5  -2 -12   90.49   27.30
  -5  -2 -12   39.80   28.90
   5   2  12  137.09   29.00
  -6  -2 -12  215.58   30.80
  -6  -2 -12  202.88   33.00
   6   2  12  276.57   33.50
  -7  -2 -12   39.60   28.80
  -7  -2 -12   77.69   31.40
   7   2  12   79.69   30.90
  -8  -2 -12   72.49   29.50
  -8  -2 -12  106.09   32.70
  -9  -2 -12   68.59   33.10
  -9  -2 -12  -38.20   29.00
 -10  -2 -12   53.49   32.40
 -10  -2 -12  -10.40   32.50
 -11  -2 -12  229.28   35.80
 -12  -2 -12   43.80   34.30
  17  -3 -12  129.59   36.70
 -17   3  12  200.08   38.20
  16  -3 -12   24.20   37.20
  16  -3 -12   22.30   32.60
 -16   3  12   23.40   33.60
  15  -3 -12  147.59   36.20
  15  -3 -12   64.29   32.20
 -15   3  12   94.39   33.20
  14  -3 -12   25.80   29.20
  14  -3 -12   58.29   33.50
 -14   3  12  103.49   32.50
  13  -3 -12   34.60   32.50
  13  -3 -12    2.90   27.40
 -13   3  12   31.70   30.00
  12  -3 -12   17.50   31.60
  12  -3 -12  -13.30   26.80
 -12   3  12   41.40   28.40
  11  -3 -12   21.30   26.70
  11  -3 -12   67.69   29.40
 -11   3  12   24.40   26.70
  10  -3 -12   50.79   29.50
 -10   3  12   83.19   27.30
   9  -3 -12   15.30   26.90
  -9   3  12  -12.30   25.30
   8  -3 -12   -7.90   26.20
  -8   3  12  -17.60   26.80
   7  -3 -12  -12.40   25.70
  -7   3  12   -9.80   27.00
   6  -3 -12  262.57   30.70
   6  -3 -12  314.87   31.30
  -6   3  12  268.07   31.60
   5  -3 -12    1.40   26.80
   5  -3 -12   21.70   25.70
  -5   3  12   36.90   25.70
   4  -3 -12  958.30   49.40
   4  -3 -12  888.81   46.80
  -4   3  12  955.10   48.00
   3  -3 -12  264.87   28.10
   3  -3 -12  314.97   31.30
  -3   3  12  426.76   32.10
   2  -3 -12   62.19   26.00
   2  -3 -12   -9.30   27.00
  -2   3  12   12.10   26.10
   1  -3 -12   16.40   26.20
   1  -3 -12   -1.80   27.40
  -1   3  12   -6.70   26.00
   0  -3 -12  215.48   31.80
   0  -3 -12  179.38   28.60
   0   3  12  180.58   29.40
  -1  -3 -12   39.10   29.00
  -1  -3 -12  -23.40   25.40
   1   3  12   50.39   28.00
  -2  -3 -12   21.40   26.40
  -2  -3 -12   24.00   30.50
   2   3  12   24.50   26.60
  -3  -3 -12   66.79   31.50
  -3  -3 -12  -31.10   25.80
   3   3  12   16.80   27.80
  -4  -3 -12  -23.70   31.30
  -4  -3 -12    5.10   26.70
  -5  -3 -12   79.39   31.90
  -5  -3 -12   31.70   27.50
  -6  -3 -12  107.69   28.60
  -6  -3 -12   83.59   32.00
  -7  -3 -12  163.88   31.70
  -7  -3 -12  158.38   35.50
  -8  -3 -12   35.00   29.10
  -8  -3 -12   29.40   34.00
  -9  -3 -12  -17.80   29.00
  -9  -3 -12    6.00   34.20
 -10  -3 -12    0.40   36.20
 -10  -3 -12  -25.00   30.60
 -11  -3 -12    1.00   31.00
 -11  -3 -12   -3.10   35.20
  15  -4 -12   35.00   39.70
  15  -4 -12   88.09   32.10
 -15   4  12   82.09   36.80
  14  -4 -12   11.10   38.30
  14  -4 -12   10.70   30.30
 -14   4  12   70.49   36.80
  13  -4 -12   56.89   31.20
  13  -4 -12   54.59   38.10
 -13   4  12  107.39   35.10
  12  -4 -12  400.86   42.90
 -12   4  12  403.16   39.80
  11  -4 -12   31.20   35.10
 -11   4  12  -26.60   29.90
  10  -4 -12   66.69   33.70
 -10   4  12   15.70   30.10
   9  -4 -12  101.99   34.00
  -9   4  12  106.29   31.60
   8  -4 -12  636.94   44.00
  -8   4  12  613.64   42.60
   7  -4 -12   99.89   32.60
  -7   4  12   96.09   32.40
   6  -4 -12   29.70   30.20
  -6   4  12  -43.20   29.70
   5  -4 -12   14.00   32.70
   5  -4 -12   49.50   29.90
  -5   4  12   18.20   30.10
   4  -4 -12    6.10   32.00
   4  -4 -12  -40.80   29.90
   3  -4 -12   19.80   29.30
   3  -4 -12   39.30   30.80
   2  -4 -12  370.56   36.80
   2  -4 -12  344.07   33.50
   1  -4 -12  -41.50   30.90
   1  -4 -12   44.80   28.80
   0  -4 -12   37.10   28.50
   0  -4 -12  -31.80   32.20
  -1  -4 -12   21.70   28.50
  -1  -4 -12   25.80   33.10
  -2  -4 -12  100.59   33.90
  -2  -4 -12   31.70   29.00
  -3  -4 -12  -38.70   33.00
  -3  -4 -12   39.50   29.20
  -4  -4 -12   17.90   28.40
  -4  -4 -12   19.10   34.80
  -5  -4 -12  393.76   41.20
  -5  -4 -12  299.57   33.80
  -6  -4 -12  -13.30   32.80
  -6  -4 -12    2.30   28.50
  -7  -4 -12   -5.10   28.90
  -7  -4 -12  -27.10   33.80
  -8  -4 -12    8.60   34.90
  -8  -4 -12   23.50   29.00
  -9  -4 -12   38.30   29.80
  -9  -4 -12   75.09   36.90
  12  -5 -12   66.09   40.10
  11  -5 -12  189.68   42.10
  10  -5 -12  193.48   40.70
   9  -5 -12   54.19   36.10
   8  -5 -12  106.49   36.50
   7  -5 -12    6.00   34.00
   6  -5 -12   33.90   34.30
   5  -5 -12    3.10   33.00
   5  -5 -12   20.70   36.80
   4  -5 -12   76.39   37.80
   4  -5 -12    4.40   32.90
   3  -5 -12    0.60   31.50
   3  -5 -12   46.10   38.20
   2  -5 -12   39.90   36.90
   2  -5 -12   -6.20   29.80
   1  -5 -12   99.09   37.40
   1  -5 -12   58.09   31.40
   0  -5 -12   83.79   37.40
   0  -5 -12   79.69   30.90
  -1  -5 -12   -2.80   30.30
  -1  -5 -12    2.80   36.30
  -2  -5 -12  176.48   38.50
  -2  -5 -12  106.69   30.70
  -3  -5 -12   56.29   30.40
  -3  -5 -12   87.79   37.60
  -4  -5 -12    8.30   28.40
  -4  -5 -12  -54.89   36.30
  -5  -5 -12  -41.20   36.40
  -5  -5 -12   13.80   27.90
  -5  -5  13   13.10   23.50
  -4  -5  13   45.30   23.90
  -3  -5  13   16.80   25.00
  -2  -5  13   16.70   27.00
  -1  -5  13    9.00   27.70
   0  -5  13  207.38   22.90
   0  -5  13  207.58   31.30
   1  -5  13   48.70   22.40
   2  -5  13   -3.50   24.10
   3  -5  13    0.60   25.40
   4  -5  13   78.99   28.10
  15   4 -13  201.18   31.50
  14   4 -13   36.20   27.50
  13   4 -13  -56.39   25.30
  -7  -4  13   48.20   19.60
  -7  -4  13   61.59   14.90
  -6  -4  13   24.90   21.10
  -6  -4  13   33.20   14.80
  -5  -4  13  356.16   25.40
  -5  -4  13  247.98   20.00
  -4  -4  13   57.79   17.10
  -4  -4  13   38.30   22.30
  -3  -4  13   -9.40   17.80
  -3  -4  13   15.40   21.80
  -2  -4  13   69.89   24.20
  -2  -4  13   37.70   16.00
  -1  -4  13    7.00   16.50
  -1  -4  13    6.80   24.00
   0  -4  13  -23.60   25.20
   1  -4  13   24.20   26.80
   8  -4  13   79.39   32.90
  17   3 -13  282.67   36.30
 -17  -3  13  204.18   22.70
  16   3 -13  103.09   31.80
 -16  -3  13  108.79   20.60
  15   3 -13   37.10   28.40
 -15  -3  13   35.80   18.50
  14   3 -13   -8.50   26.60
 -14  -3  13   21.40   17.90
  13   3 -13  319.37   30.60
 -13  -3  13  335.77   23.20
  12   3 -13  190.68   27.30
 -12  -3  13  170.28   19.90
  11   3 -13  198.28   26.80
 -11  -3  13  234.18   20.60
 -10  -3  13   12.90   17.30
  -9  -3  13   46.30   17.40
  -8  -3  13  405.46   26.50
  -7  -3  13  549.65   28.40
  -7  -3  13  629.14   32.80
  -6  -3  13  361.86   29.20
  -6  -3  13  350.26   26.50
  -5  -3  13  429.26   28.20
  -5  -3  13  486.95   24.30
  -5  -3  13  498.15   31.50
  -4  -3  13  -10.30   14.80
  -4  -3  13   19.80   16.90
  -4  -3  13    5.60   15.10
  -4  -3  13   35.40   20.30
  -3  -3  13  242.58   19.10
  -3  -3  13  200.48   20.40
  -3  -3  13  203.08   18.80
  -3  -3  13  252.87   23.00
  -2  -3  13  -26.00   16.50
  -2  -3  13   12.80   17.90
  -2  -3  13    1.70   20.00
  -2  -3  13   23.90   15.80
  -1  -3  13   -1.10   19.90
  -1  -3  13   21.30   16.30
  -1  -3  13   -3.50   19.50
  -1  -3  13    8.60   17.80
   0  -3  13  134.09   22.90
   0  -3  13  119.29   23.60
   0  -3  13  146.59   20.50
   1  -3  13  -31.30   22.30
   1  -3  13    3.50   19.80
   2  -3  13   -1.30   21.30
   2  -3  13   32.00   24.40
   3  -3  13   10.50   22.70
   4  -3  13   26.70   23.70
   5  -3  13   11.50   24.90
   6  -3  13  150.18   28.70
   7  -3  13   43.70   29.80
   8  -3  13   44.00   32.00
   9  -3  13   31.20   33.80
  10  -3  13   52.09   35.40
  18   2 -13  162.98   35.50
 -18  -2  13  201.28   21.10
 -18  -2  13  221.58   24.70
  17   2 -13   18.00   29.80
 -17  -2  13   37.70   17.40
 -17  -2  13   17.60   20.10
  16   2 -13   49.90   29.50
 -16  -2  13   90.19   21.80
 -16  -2  13   64.49   18.10
  15   2 -13   85.09   30.20
 -15  -2  13   81.69   21.40
 -15  -2  13   72.09   17.20
  14   2 -13    4.80   26.90
 -14  -2  13   57.19   14.70
 -14  -2  13   72.49   18.00
 -14  -2  13   51.99   19.80
  13   2 -13   35.40   26.20
 -13  -2  13   25.30   19.10
 -13  -2  13   54.69   17.60
  12   2 -13   44.30   24.40
 -12  -2  13   57.69   19.90
 -12  -2  13   43.10   14.80
 -12  -2  13   55.09   17.40
  11   2 -13  118.49   25.60
 -11  -2  13  171.18   21.00
 -11  -2  13  166.98   18.50
 -11  -2  13  155.08   16.10
  10   2 -13 1078.79   46.00
 -10  -2  13 1035.60   34.70
 -10  -2  13 1016.40   36.40
 -10  -2  13 1030.90   39.50
  -9  -2  13 1060.79   34.70
  -9  -2  13 1069.79   38.70
  -9  -2  13 1042.00   36.40
  -8  -2  13  546.25   26.50
  -8  -2  13  523.45   28.20
  -8  -2  13  638.44   31.60
  -7  -2  13  -24.60   14.60
  -7  -2  13    7.40   17.80
  -7  -2  13    9.10   15.60
  -7  -2  13   11.00   17.40
  -6  -2  13  206.68   18.10
  -6  -2  13  255.27   21.50
  -6  -2  13  232.08   19.20
  -6  -2  13  221.18   20.70
  -5  -2  13   62.29   15.80
  -5  -2  13   91.39   17.70
  -5  -2  13   68.59   17.30
  -5  -2  13   57.49   18.20
  -4  -2  13  510.75   29.50
  -4  -2  13  550.74   28.30
  -4  -2  13  537.35   30.60
  -4  -2  13  505.15   28.80
  -3  -2  13    6.10   17.20
  -3  -2  13    1.30   18.70
  -3  -2  13    0.70   15.60
  -3  -2  13   -0.10   17.80
  -2  -2  13 1293.67   43.80
  -2  -2  13 1252.37   44.10
  -2  -2  13 1249.77   41.10
  -2  -2  13 1293.47   42.60
  -1  -2  13  245.68   23.50
  -1  -2  13  239.88   22.80
  -1  -2  13  238.68   20.20
  -1  -2  13  285.67   22.40
   0  -2  13  114.79   17.20
   0  -2  13  118.59   21.40
   0  -2  13   79.29   19.80
   0  -2  13  112.99   21.40
   1  -2  13  126.59   23.40
   1  -2  13  128.89   20.70
   1  -2  13  127.49   22.20
   2  -2  13   54.39   22.40
   2  -2  13    2.30   23.30
   2  -2  13    6.00   18.80
   3  -2  13   66.69   24.90
   3  -2  13   87.69   26.70
   4  -2  13   75.39   25.40
   5  -2  13   -4.20   25.10
   6  -2  13  107.69   28.40
   7  -2  13    3.90   28.70
   8  -2  13   16.10   31.50
   9  -2  13   67.49   32.90
  10  -2  13    3.10   33.90
  11  -2  13   -9.40   35.50
  19   1 -13   65.69   33.80
 -19  -1  13   21.90   23.70
 -19  -1  13   31.60   19.90
  18   1 -13  362.46   39.80
 -18  -1  13  405.46   30.20
 -18  -1  13  423.86   32.20
  17   1 -13   15.70   31.30
 -17  -1  13   -2.90   21.10
 -17  -1  13   44.50   18.60
  16   1 -13   19.30   28.70
 -16  -1  13   -1.80   17.40
 -16  -1  13   18.00   21.70
  15   1 -13   31.80   28.00
 -15  -1  13   34.80   21.70
 -15  -1  13   -0.70   17.10
  14   1 -13  950.90   49.60
 -14  -1  13  957.00   38.00
 -14  -1  13  877.01   41.90
  13   1 -13  512.45   41.90
 -13  -1  13  503.15   34.20
 -13  -1  13  521.05   31.00
  12   1 -13   24.90   25.10
 -12  -1  13   29.30   20.20
 -12  -1  13   33.60   18.10
 -12  -1  13   13.70   18.40
  11   1 -13   46.30   23.10
 -11  -1  13   72.69   21.30
 -11  -1  13   74.79   16.90
 -11  -1  13   65.99   17.70
  10   1 -13  195.38   25.70
 -10  -1  13  152.48   18.20
 -10  -1  13  167.68   20.00
 -10  -1  13  182.88   22.40
  -9  -1  13  -26.00   16.90
  -9  -1  13  -36.70   19.00
  -9  -1  13   10.70   15.60
  -8  -1  13  130.59   18.20
  -8  -1  13  130.79   20.40
  -8  -1  13  136.09   19.70
  -7  -1  13  115.19   18.50
  -7  -1  13   89.69   17.70
  -7  -1  13   82.19   20.20
   6   1 -13  310.17   21.50
  -6  -1  13  240.08   19.80
  -6  -1  13  275.97   22.50
  -6  -1  13  266.67   23.30
  -6  -1  13  220.78   20.70
   5   1 -13   43.40   17.00
  -5  -1  13   55.29   18.20
  -5  -1  13   26.00   16.10
  -5  -1  13   24.20   18.70
  -5  -1  13   19.20   16.90
   4   1 -13   37.80   16.40
  -4  -1  13   32.50   18.70
  -4  -1  13  -27.40   15.50
  -4  -1  13   22.50   15.80
  -4  -1  13  -12.10   18.10
   3   1 -13   49.40   17.00
  -3  -1  13   26.90   19.00
  -3  -1  13   24.00   16.20
  -3  -1  13    6.30   18.20
  -3  -1  13   35.00   16.70
   2   1 -13  223.98   19.80
  -2  -1  13  165.38   18.50
  -2  -1  13  215.08   21.90
  -2  -1  13  207.98   22.90
  -2  -1  13  152.38   18.40
   1   1 -13   41.00   18.30
  -1  -1  13   25.70   21.00
  -1  -1  13   20.50   19.70
  -1  -1  13   36.70   17.40
   0   1 -13   42.90   19.70
   0  -1  13   31.30   20.60
   0  -1  13   64.39   19.00
   0  -1  13   24.70   20.50
  -1   1 -13   41.60   19.70
   1  -1  13  -13.60   20.90
   1  -1  13   -3.30   17.80
   1  -1  13    8.10   21.30
  -2   1 -13    8.70   20.50
   2  -1  13   18.10   18.30
   2  -1  13   29.40   22.10
   2  -1  13   29.80   22.90
  -3   1 -13  -50.39   21.30
   3  -1  13  -46.90   23.50
   3  -1  13   -1.00   23.10
  -4   1 -13   35.60   23.40
   4  -1  13  -33.10   23.20
   4  -1  13  -38.60   24.60
  -5   1 -13   34.90   24.50
   5  -1  13    3.00   28.50
   5  -1  13   -7.70   25.80
  -6   1 -13  -21.60   25.40
   6  -1  13   32.00   29.00
  -7   1 -13   95.49   28.20
   7  -1  13  112.19   32.70
  -8   1 -13  -42.30   28.80
   8  -1  13  -24.50   31.90
  -9   1 -13   58.89   30.90
   9  -1  13   29.50   33.80
 -10   1 -13  118.49   33.50
  10  -1  13   44.70   33.90
 -11   1 -13   -1.40   32.10
  11  -1  13  -57.39   34.10
 -12   1 -13   -5.40   34.70
  12  -1  13    0.30   36.10
  19   0 -13   58.99   34.00
 -19   0  13   38.20   22.90
 -19   0  13   38.40   24.90
  18   0 -13  -31.00   31.40
 -18   0  13    4.50   21.30
 -18   0  13   -7.20   24.70
  17   0 -13  361.16   37.30
 -17   0  13  403.76   32.50
 -17   0  13  489.15   35.80
  16   0 -13    3.90   27.70
 -16   0  13  -17.20   19.50
 -16   0  13   19.30   24.30
  15   0 -13   80.69   29.50
 -15   0  13   65.79   24.00
 -15   0  13   51.69   20.40
  14   0 -13  -40.20   26.50
 -14   0  13   -9.60   22.10
 -14   0  13   31.40   18.70
  13   0 -13  216.48   30.60
 -13   0  13  329.07   28.30
 -13   0  13  248.88   23.50
  12   0 -13   37.20   25.40
 -12   0  13   55.29   22.60
 -12   0  13   15.20   18.50
  11   0 -13   74.79   23.80
 -11   0  13   90.09   20.30
 -11   0  13   41.30   22.30
  10   0 -13  -17.60   18.00
  10   0 -13   16.00   22.30
 -10   0  13   12.70   18.50
 -10   0  13   15.00   20.90
 -10   0  13   13.50   19.10
   9   0 -13  157.28   20.70
   9   0 -13  154.28   25.00
  -9   0  13  126.89   24.00
  -9   0  13  146.29   20.90
  -9   0  13  144.09   19.90
   8   0 -13   13.30   17.90
  -8   0  13   -2.70   20.60
  -8   0  13   -6.50   18.50
   7   0 -13  410.36   29.50
  -7   0  13  476.45   34.00
  -7   0  13  485.05   32.90
   6   0 -13   20.70   18.10
  -6   0  13  -21.10   20.00
  -6   0  13   36.30   19.80
   5   0 -13    1.80   17.70
  -5   0  13   39.20   19.60
  -5   0  13   28.50   20.30
   4   0 -13   11.00   18.40
  -4   0  13  -17.70   15.50
  -4   0  13  -22.30   19.20
  -4   0  13   -6.10   19.60
   3   0 -13  414.16   30.60
  -3   0  13  392.86   31.80
  -3   0  13  432.46   31.60
  -3   0  13  444.76   29.00
   2   0 -13   23.20   18.00
  -2   0  13   15.60   21.10
  -2   0  13  -30.80   19.10
  -2   0  13    8.40   17.20
   1   0 -13  147.59   20.80
  -1   0  13  112.19   17.80
  -1   0  13  192.18   24.00
  -1   0  13  178.88   22.70
   0   0 -13    8.70   22.10
   0   0 -13   -9.10   17.70
   0   0  13   -8.50   20.70
   0   0  13   19.90   21.40
  -1   0 -13  159.78   24.50
  -1   0 -13  138.09   22.70
   1   0  13  128.99   23.20
   1   0  13  178.58   25.00
  -2   0 -13   83.89   22.50
  -2   0 -13   48.20   23.70
   2   0  13   -0.60   22.30
   2   0  13   -1.20   24.10
  -3   0 -13  573.74   37.30
  -3   0 -13  519.85   37.80
   3   0  13  522.45   38.80
   3   0  13  658.33   40.70
  -4   0 -13    8.90   23.50
  -4   0 -13  -10.60   32.40
   4   0  13   17.20   26.80
   4   0  13  -31.10   23.70
  -5   0 -13   34.00   25.70
   5   0  13   55.69   28.30
   5   0  13    8.80   26.20
  -6   0 -13   -7.90   25.50
   6   0  13    7.80   26.40
   6   0  13    5.20   29.60
  -7   0 -13   42.00   27.90
   7   0  13   86.29   31.80
  -8   0 -13  -13.10   28.80
   8   0  13  -32.50   30.60
  -9   0 -13  -37.70   29.50
   9   0  13  -26.40   32.30
 -10   0 -13  -12.80   32.00
  10   0  13  -10.70   35.10
 -11   0 -13   84.99   35.50
  11   0  13   44.80   36.70
 -12   0 -13  -23.30   33.90
  12   0  13   56.79   37.80
 -13   0 -13   86.79   37.00
  19  -1 -13  -13.40   31.50
 -19   1  13    0.80   26.80
 -19   1  13   21.60   27.60
  18  -1 -13  344.07   38.00
 -18   1  13  373.26   36.10
 -18   1  13  436.96   34.10
  17  -1 -13   10.70   29.50
 -17   1  13   11.60   25.70
 -17   1  13    1.90   24.30
  16  -1 -13    7.90   29.40
 -16   1  13   63.09   24.60
 -16   1  13   -4.40   25.60
  15  -1 -13   20.90   29.00
 -15   1  13   26.60   23.00
 -15   1  13   26.20   25.30
  14  -1 -13  866.11   50.79
 -14   1  13  935.71   44.60
 -14   1  13  916.41   48.70
  13  -1 -13  516.25   37.50
 -13   1  13  464.75   37.40
 -13   1  13  647.54   37.00
  12  -1 -13   67.59   25.20
  12  -1 -13   37.20   22.70
 -12   1  13   62.79   21.80
 -12   1  13   61.49   25.30
  11  -1 -13   82.49   23.00
  11  -1 -13   86.49   24.50
 -11   1  13   99.79   24.70
 -11   1  13   39.10   21.50
  10  -1 -13  138.79   26.10
  10  -1 -13  196.28   24.50
 -10   1  13  219.78   27.00
 -10   1  13  225.88   25.50
   9  -1 -13    5.60   20.20
  -9   1  13   26.10   21.30
  -9   1  13   14.00   22.90
   8  -1 -13  165.78   23.10
  -8   1  13  100.89   22.90
  -8   1  13  148.19   24.50
   7  -1 -13  135.49   34.90
   7  -1 -13  125.99   22.30
  -7   1  13  116.59   23.90
  -7   1  13  137.29   23.20
   6  -1 -13  304.97   24.80
   6  -1 -13  301.97   26.90
  -6   1  13  255.17   25.70
  -6   1  13  281.27   26.00
   5  -1 -13   36.40   21.10
   5  -1 -13   58.59   20.80
  -5   1  13   80.79   23.10
  -5   1  13    0.20   20.90
   4  -1 -13   52.29   22.30
   4  -1 -13   42.40   20.10
  -4   1  13   61.29   22.30
  -4   1  13   40.60   21.20
   3  -1 -13    3.90   21.60
   3  -1 -13   43.50   20.70
  -3   1  13   32.90   22.10
  -3   1  13   -3.40   19.20
   2  -1 -13  227.18   26.40
   2  -1 -13  182.48   23.80
  -2   1  13  218.58   25.50
  -2   1  13  181.48   25.80
   1  -1 -13   26.10   20.60
   1  -1 -13   36.50   23.00
  -1   1  13   33.00   23.30
  -1   1  13   28.80   21.00
   0  -1 -13   51.69   24.20
   0  -1 -13   -2.50   20.90
   0   1  13   53.69   23.30
   0   1  13   41.00   22.00
  -1  -1 -13  -31.60   24.30
  -1  -1 -13    6.40   22.00
   1   1  13   29.20   22.00
   1   1  13  -13.60   23.90
  -2  -1 -13  -61.79   21.60
  -2  -1 -13    7.90   24.00
   2   1  13  -36.00   22.20
   2   1  13   19.10   24.80
  -3  -1 -13   31.90   26.60
  -3  -1 -13   -2.40   23.80
   3   1  13   48.60   23.10
   3   1  13    5.70   26.00
  -4  -1 -13  -17.50   26.90
  -4  -1 -13  -16.70   25.30
   4   1  13  -19.30   27.20
   4   1  13  -20.90   24.70
  -5  -1 -13    7.60   28.00
  -5  -1 -13   19.90   26.50
   5   1  13    4.70   27.80
  -6  -1 -13   -3.10   27.70
  -6  -1 -13   27.80   30.00
   6   1  13    9.90   30.50
  -7  -1 -13   44.10   29.40
   7   1  13  136.49   32.70
  -8  -1 -13  -34.40   28.80
   8   1  13  -57.29   31.40
  -9  -1 -13   22.30   31.00
   9   1  13   41.20   34.10
 -10  -1 -13  180.88   34.40
 -11  -1 -13  -21.00   34.00
 -12  -1 -13   18.40   35.90
  18  -2 -13  284.47   39.90
 -18   2  13  284.77   36.80
  17  -2 -13   13.20   32.30
 -17   2  13   69.69   30.20
  16  -2 -13   51.29   32.40
 -16   2  13   91.99   30.90
  15  -2 -13   76.59   31.60
 -15   2  13   92.29   29.00
 -15   2  13  148.89   47.00
  14  -2 -13   54.49   29.50
  14  -2 -13   37.80   28.60
 -14   2  13  100.19   28.10
 -14   2  13   60.09   28.30
  13  -2 -13   55.39   28.30
  13  -2 -13   49.70   27.10
 -13   2  13   49.50   27.40
 -13   2  13   34.30   25.70
  12  -2 -13   67.69   27.20
  12  -2 -13   39.50   26.90
 -12   2  13   -1.20   25.80
 -12   2  13   32.00   25.40
  11  -2 -13  115.29   27.70
  11  -2 -13  169.08   29.10
 -11   2  13  125.09   26.20
 -11   2  13  136.89   27.10
  10  -2 -13 1123.09   49.60
 -10   2  13 1033.90   49.00
 -10   2  13 1131.09   48.90
   9  -2 -13 1085.49   48.50
  -9   2  13 1072.09   50.19
  -9   2  13 1086.99   48.70
   8  -2 -13  615.54   39.40
   8  -2 -13  635.94   41.70
  -8   2  13  579.84   38.60
  -8   2  13  595.74   42.60
   7  -2 -13   -4.90   22.70
   7  -2 -13   -8.60   23.80
  -7   2  13  -55.99   23.40
  -7   2  13   28.60   24.10
   6  -2 -13  243.28   26.80
   6  -2 -13  200.38   25.00
  -6   2  13  229.98   26.40
  -6   2  13  271.27   27.70
   5  -2 -13   47.70   23.20
   5  -2 -13   73.69   24.00
  -5   2  13   80.39   25.30
  -5   2  13   76.59   23.00
   4  -2 -13  567.34   41.40
   4  -2 -13  546.05   39.20
  -4   2  13  556.24   40.40
  -4   2  13  570.44   37.50
   3  -2 -13   13.80   24.50
   3  -2 -13    4.00   22.80
  -3   2  13   -1.10   20.60
  -3   2  13  -16.40   25.00
   2  -2 -13 1321.37   53.39
   2  -2 -13 1433.06   54.09
  -2   2  13 1366.66   49.40
  -2   2  13 1441.06   53.99
   1  -2 -13  306.47   29.30
   1  -2 -13  371.76   30.70
  -1   2  13  294.27   30.20
  -1   2  13  288.47   28.60
   0  -2 -13  140.69   28.60
   0  -2 -13   94.69   25.40
   0   2  13  109.19   24.70
   0   2  13  150.98   28.20
  -1  -2 -13  160.48   30.50
  -1  -2 -13  108.89   26.60
   1   2  13  115.99   33.80
   1   2  13   85.59   27.70
  -2  -2 -13  -13.60   24.30
  -2  -2 -13    9.60   28.40
   2   2  13   14.60   26.70
  -3  -2 -13  116.39   27.30
  -3  -2 -13  139.79   30.10
   3   2  13  122.29   29.50
  -4  -2 -13   89.09   30.10
  -4  -2 -13   82.99   28.40
   4   2  13  126.89   32.20
  -5  -2 -13   26.00   27.80
  -5  -2 -13  -36.40   29.80
   5   2  13    7.90   30.60
  -6  -2 -13  128.59   33.60
  -6  -2 -13  143.19   31.50
   6   2  13  129.19   33.00
  -7  -2 -13   29.50   32.60
  -7  -2 -13   17.60   29.80
   7   2  13   44.40   56.89
  -8  -2 -13   14.40   33.80
  -8  -2 -13    3.90   29.50
  -9  -2 -13   90.89   32.90
 -10  -2 -13   35.60   33.80
 -11  -2 -13   17.20   33.30
  17  -3 -13  259.57   38.30
 -17   3  13  333.47   41.40
  16  -3 -13  112.39   32.80
 -16   3  13  111.69   35.80
  15  -3 -13   85.49   31.20
  15  -3 -13   76.49   35.40
 -15   3  13   88.19   33.70
  14  -3 -13    2.00   29.00
  14  -3 -13   -8.20   34.00
 -14   3  13  -65.29   29.90
  13  -3 -13  395.86   40.70
  13  -3 -13  264.47   34.80
 -13   3  13  359.56   36.70
  12  -3 -13  179.68   32.00
  12  -3 -13  207.58   35.30
 -12   3  13  173.88   32.70
  11  -3 -13  165.88   33.50
 -11   3  13  182.28   31.70
  10  -3 -13   37.40   29.70
 -10   3  13    0.50   27.60
   9  -3 -13   37.90   30.10
  -9   3  13   34.00   29.20
   8  -3 -13  432.86   36.60
  -8   3  13  395.46   36.10
   7  -3 -13  600.24   46.20
   7  -3 -13  585.54   46.50
  -7   3  13  633.24   40.50
   6  -3 -13  428.26   34.70
   6  -3 -13  447.36   35.20
  -6   3  13  473.65   36.70
   5  -3 -13  560.84   36.90
   5  -3 -13  521.45   36.90
  -5   3  13  582.74   37.60
   4  -3 -13    0.50   27.50
   4  -3 -13   37.40   29.20
  -4   3  13   29.40   27.10
   3  -3 -13  338.67   34.30
   3  -3 -13  271.67   32.40
  -3   3  13  314.97   33.70
   2  -3 -13   45.50   28.00
   2  -3 -13   75.79   30.00
  -2   3  13  -17.40   27.40
   1  -3 -13   40.00   31.00
   1  -3 -13   -7.90   27.50
  -1   3  13   77.79   29.20
   0  -3 -13  170.08   29.40
   0  -3 -13  187.38   32.70
   0   3  13  179.58   31.20
  -1  -3 -13   12.80   27.70
  -1  -3 -13   60.29   31.60
   1   3  13   37.20   29.90
  -2  -3 -13  -22.20   30.30
  -2  -3 -13   64.59   28.10
   2   3  13   31.80   28.70
  -3  -3 -13  -31.10   28.40
  -3  -3 -13   30.40   32.70
  -4  -3 -13    3.30   32.50
  -4  -3 -13   24.80   28.70
  -5  -3 -13  -50.89   28.60
  -5  -3 -13    2.10   32.30
  -6  -3 -13  215.98   32.30
  -6  -3 -13  190.48   35.50
  -7  -3 -13  112.19   36.20
  -7  -3 -13   61.39   31.20
  -8  -3 -13    3.20   30.20
  -8  -3 -13   33.30   35.10
  -9  -3 -13   62.49   37.50
  -9  -3 -13   70.29   31.90
 -10  -3 -13   76.89   33.50
 -10  -3 -13   11.40   40.90
  15  -4 -13  173.28   36.00
  15  -4 -13  219.28   45.10
 -15   4  13  249.48   41.70
  14  -4 -13  -14.50   31.10
  14  -4 -13  -65.69   38.00
 -14   4  13  -12.00   33.40
  13  -4 -13   -8.20   36.90
 -13   4  13   20.20   33.50
  12  -4 -13   58.69   37.40
 -12   4  13  -30.70   32.30
  11  -4 -13   31.10   35.40
 -11   4  13   60.49   32.50
  10  -4 -13   58.29   36.40
 -10   4  13  -19.90   32.50
   9  -4 -13  219.28   36.60
  -9   4  13   91.29   34.60
   8  -4 -13  451.15   41.60
  -8   4  13  489.15   41.70
   7  -4 -13  128.29   34.70
   7  -4 -13  125.49   39.30
  -7   4  13   71.69   34.20
   6  -4 -13   51.29   32.40
   6  -4 -13   73.69   35.50
  -6   4  13   24.00   33.10
   5  -4 -13  336.07   37.70
   5  -4 -13  359.96   37.80
   4  -4 -13   20.20   32.70
   4  -4 -13   22.50   31.30
   3  -4 -13   60.89   31.70
   3  -4 -13   35.10   31.20
   2  -4 -13   48.70   30.80
   2  -4 -13   62.39   34.20
   1  -4 -13   10.40   33.50
   1  -4 -13    9.50   29.50
   0  -4 -13   33.90   34.00
   0  -4 -13   28.80   29.70
  -1  -4 -13  -39.30   29.90
  -1  -4 -13   94.49   34.80
  -2  -4 -13   -0.50   35.20
  -2  -4 -13   53.29   30.20
  -3  -4 -13   80.79   31.10
  -3  -4 -13  -36.30   34.20
  -4  -4 -13  -11.90   34.90
  -4  -4 -13    7.10   29.70
  -5  -4 -13   93.99   37.80
  -5  -4 -13   96.99   31.00
  -6  -4 -13  -18.50   35.20
  -6  -4 -13  -17.70   29.40
  -7  -4 -13   -0.10   35.40
  -7  -4 -13  -53.89   28.70
  -8  -4 -13  120.99   37.60
  -8  -4 -13    0.10   29.90
  11  -5 -13   90.79   40.80
  10  -5 -13   39.60   38.00
   9  -5 -13  -34.70   36.50
   8  -5 -13    0.80   36.10
   7  -5 -13   37.50   35.60
   6  -5 -13   93.79   36.60
   6  -5 -13   25.10   42.80
   5  -5 -13   29.60   36.30
   5  -5 -13   43.40   38.30
   4  -5 -13   13.20   39.50
   4  -5 -13    1.70   33.70
   3  -5 -13   -0.70   37.40
   3  -5 -13  114.29   33.70
   2  -5 -13  -35.50   31.70
   2  -5 -13   40.00   37.90
   1  -5 -13   42.30   37.50
   1  -5 -13   13.50   32.00
   0  -5 -13  176.98   33.80
   0  -5 -13  304.17   41.90
  -1  -5 -13   61.39   32.00
  -1  -5 -13   33.90   37.30
  -2  -5 -13   -8.70   36.90
  -2  -5 -13   73.29   31.40
  -3  -5 -13    2.10   30.50
  -3  -5 -13    5.40   38.00
  -4  -5 -13  146.59   39.50
  -4  -5 -13   91.99   31.60
  -6  -5  14   48.90   24.30
  -5  -5  14   20.00   24.70
  -4  -5  14   11.40   26.70
  -3  -5  14  127.79   28.20
  -2  -5  14  -17.80   27.70
  -1  -5  14   36.10   29.20
   0  -5  14   35.30   20.70
   1  -5  14   87.59   24.20
   2  -5  14    7.30   24.70
  -9  -4  14   12.10   15.70
  -8  -4  14   63.09   21.40
  -8  -4  14   39.50   16.20
  -7  -4  14   45.10   16.10
  -7  -4  14   49.90   21.40
  -6  -4  14    7.20   16.10
  -6  -4  14   -6.50   21.90
  -5  -4  14  288.67   22.00
  -5  -4  14  384.96   28.20
  -4  -4  14   47.90   18.60
  -4  -4  14   22.80   23.80
  -3  -4  14   48.90   25.30
  -3  -4  14   73.69   20.20
  -2  -4  14  274.27   21.00
  -2  -4  14  334.27   29.40
  -1  -4  14   19.20   26.30
   0  -4  14   29.70   26.80
   1  -4  14   44.10   22.90
   2  -4  14  255.97   27.40
   3  -4  14  -12.10   24.60
  16   3 -14   63.79   30.20
 -16  -3  14   75.99   21.00
  15   3 -14   28.30   27.70
 -15  -3  14    5.20   20.20
  14   3 -14    3.90   25.70
 -14  -3  14   -5.40   19.10
  13   3 -14   86.59   27.10
 -13  -3  14   63.29   19.70
 -12  -3  14    4.70   18.60
 -11  -3  14   20.20   19.00
 -10  -3  14  156.18   20.70
  -9  -3  14    2.60   17.60
  -8  -3  14  812.72   34.50
  -8  -3  14  891.21   37.90
  -7  -3  14  263.67   21.30
  -7  -3  14  302.37   25.20
  -6  -3  14  961.60   38.70
  -6  -3  14  863.11   36.10
  -6  -3  14  961.50   32.10
  -5  -3  14    8.10   20.30
  -5  -3  14   26.70   18.40
  -5  -3  14  -15.00   15.10
  -5  -3  14   21.30   16.30
  -4  -3  14   34.40   16.90
  -4  -3  14   15.80   18.20
  -4  -3  14   25.90   22.80
  -4  -3  14   38.60   17.00
  -3  -3  14  435.96   28.10
  -3  -3  14  428.06   28.60
  -3  -3  14  367.76   24.80
  -3  -3  14  373.36   27.20
  -2  -3  14  126.69   23.50
  -2  -3  14  110.49   19.50
  -2  -3  14   87.09   18.10
  -2  -3  14  134.49   21.10
  -1  -3  14   16.00   19.20
  -1  -3  14   22.30   22.90
  -1  -3  14    4.40   21.00
   0  -3  14   67.49   23.00
   0  -3  14    2.50   20.10
   0  -3  14   72.89   23.20
   1  -3  14    3.90   25.50
   1  -3  14  -23.00   24.40
   1  -3  14    5.10   20.90
   2  -3  14    4.90   22.20
   3  -3  14   27.20   24.00
   4  -3  14   48.70   25.30
   5  -3  14   -2.70   25.90
   6  -3  14   23.60   27.20
   7  -3  14  -14.40   29.70
   8  -3  14  119.59   33.90
   9  -3  14   49.60   34.70
  18   2 -14   23.80   31.50
 -18  -2  14    3.80   18.30
 -18  -2  14   10.70   22.50
  17   2 -14   69.99   31.90
 -17  -2  14   76.59   23.10
 -17  -2  14  117.29   19.50
  16   2 -14  197.08   34.00
 -16  -2  14  141.19   23.70
 -16  -2  14  143.29   19.70
  15   2 -14  394.86   36.40
 -15  -2  14  371.26   24.00
 -15  -2  14  387.16   28.10
  14   2 -14  146.49   29.50
 -14  -2  14  175.78   24.00
 -14  -2  14  188.98   20.70
  13   2 -14   41.30   25.70
 -13  -2  14    7.30   18.10
 -13  -2  14   65.29   21.90
 -13  -2  14   15.50   16.00
  12   2 -14  402.96   32.40
 -12  -2  14  376.36   28.00
 -12  -2  14  376.26   26.30
 -12  -2  14  433.36   27.40
  11   2 -14  478.85   39.30
 -11  -2  14  416.66   33.50
 -11  -2  14  435.46   28.50
 -11  -2  14  424.66   26.40
 -10  -2  14   10.30   17.30
 -10  -2  14  -10.70   18.90
 -10  -2  14   23.00   15.20
  -9  -2  14  237.48   19.50
  -9  -2  14  285.37   24.60
  -9  -2  14  269.97   20.90
  -8  -2  14  344.37   24.60
  -8  -2  14  300.47   20.70
  -8  -2  14  292.57   22.10
  -7  -2  14  308.17   24.30
  -7  -2  14  297.37   24.20
  -7  -2  14  335.27   22.10
  -7  -2  14  303.67   22.10
  -6  -2  14   29.90   18.80
  -6  -2  14   32.20   19.20
  -6  -2  14    4.90   15.80
  -6  -2  14   18.60   17.10
  -5  -2  14  350.06   23.30
  -5  -2  14  286.47   23.00
  -5  -2  14  284.77   21.20
  -5  -2  14  339.37   23.90
  -4  -2  14  206.28   21.20
  -4  -2  14  221.98   20.50
  -4  -2  14  159.38   21.10
  -4  -2  14  226.88   22.70
  -3  -2  14  176.78   21.40
  -3  -2  14  203.08   23.40
  -3  -2  14  212.98   22.40
  -3  -2  14  174.48   20.40
  -2  -2  14  574.34   33.40
  -2  -2  14  541.45   30.20
  -2  -2  14  538.55   34.20
  -2  -2  14  524.75   33.80
  -1  -2  14   96.19   22.10
  -1  -2  14   63.59   22.60
  -1  -2  14   91.49   21.50
   0  -2  14  -16.40   21.30
   0  -2  14  -26.60   19.30
   0  -2  14   58.49   22.50
   1  -2  14   16.40   23.70
   1  -2  14   67.39   23.00
   1  -2  14   32.60   20.80
   2  -2  14  -19.80   22.80
   2  -2  14  -15.40   23.80
   3  -2  14  131.39   27.80
   3  -2  14  122.19   26.60
   4  -2  14   71.79   27.10
   5  -2  14   75.49   28.40
   6  -2  14   26.90   28.90
   7  -2  14    5.20   30.00
   8  -2  14   37.60   32.50
   9  -2  14   -7.90   34.40
  10  -2  14   19.70   35.00
  11  -2  14   17.70   36.10
  19   1 -14  -44.90   30.00
 -19  -1  14   36.00   20.20
 -19  -1  14   46.20   25.10
  18   1 -14   21.50   31.40
 -18  -1  14   29.50   24.20
 -18  -1  14   19.60   18.90
  17   1 -14   14.50   31.00
 -17  -1  14   30.70   23.80
 -17  -1  14    3.60   18.70
  16   1 -14  134.09   32.40
 -16  -1  14  114.19   21.00
 -16  -1  14  113.89   25.20
  15   1 -14  -10.90   28.40
 -15  -1  14   -6.30   18.10
 -15  -1  14   18.40   22.00
  14   1 -14  173.08   30.80
 -14  -1  14  225.68   22.70
 -14  -1  14  290.37   27.70
  13   1 -14   73.39   26.40
 -13  -1  14   89.09   24.70
 -13  -1  14   59.99   19.30
  12   1 -14   40.90   24.70
 -12  -1  14   81.19   23.40
 -12  -1  14   72.89   19.40
  11   1 -14   59.09   24.90
 -11  -1  14   -7.90   22.10
 -11  -1  14   42.10   19.00
 -10  -1  14   73.89   17.80
 -10  -1  14   50.29   21.90
 -10  -1  14   54.49   20.00
  -9  -1  14   58.59   17.70
  -9  -1  14   79.29   19.90
  -9  -1  14   64.89   21.10
  -8  -1  14  176.58   19.70
  -8  -1  14  177.48   24.50
  -8  -1  14  215.68   22.00
  -7  -1  14   30.00   21.40
  -7  -1  14   10.60   18.10
  -7  -1  14   -6.00   16.40
   6   1 -14   72.69   19.30
  -6  -1  14   18.70   17.40
  -6  -1  14   54.69   19.90
  -6  -1  14   46.20   18.10
  -6  -1  14   57.99   21.30
   5   1 -14  108.99   19.40
  -5  -1  14   78.99   17.80
  -5  -1  14  131.69   21.90
  -5  -1  14   94.69   20.30
  -5  -1  14   85.09   20.10
   4   1 -14   81.19   18.50
  -4  -1  14   77.19   20.70
  -4  -1  14   66.79   18.10
  -4  -1  14   41.10   17.80
  -4  -1  14   99.09   22.00
   3   1 -14   87.29   18.40
  -3  -1  14   29.00   16.80
  -3  -1  14   36.40   20.00
  -3  -1  14   45.00   17.80
  -3  -1  14   38.00   21.00
   2   1 -14   11.50   17.10
  -2  -1  14   39.60   19.00
  -2  -1  14   29.30   20.40
  -2  -1  14   17.70   21.40
  -2  -1  14   31.60   17.50
   1   1 -14  232.98   23.40
  -1  -1  14  253.67   25.70
  -1  -1  14  247.78   25.30
  -1  -1  14  226.68   22.10
   0   1 -14  -26.40   19.70
   0  -1  14  -14.80   18.50
   0  -1  14  -12.50   22.10
   0  -1  14   -3.20   21.60
  -1   1 -14  429.36   33.70
   1  -1  14  391.66   29.00
   1  -1  14  395.06   29.60
   1  -1  14  306.27   27.40
  -2   1 -14  155.08   24.80
   2  -1  14  182.68   28.00
   2  -1  14  181.78   27.20
  -3   1 -14  412.06   30.70
   3  -1  14  368.06   31.00
   3  -1  14  418.86   32.50
  -4   1 -14    7.40   24.50
   4  -1  14    6.60   28.30
   4  -1  14    0.50   26.80
  -5   1 -14  347.37   32.10
   5  -1  14  363.16   34.00
   5  -1  14  308.67   31.40
  -6   1 -14   70.49   28.50
   6  -1  14  112.79   31.00
  -7   1 -14   56.49   29.30
   7  -1  14   45.50   33.00
  -8   1 -14   40.50   31.30
   8  -1  14   -4.70   33.20
  -9   1 -14   67.39   33.30
   9  -1  14   53.19   34.80
 -10   1 -14   -5.10   36.10
  10  -1  14   71.99   35.30
  11  -1  14    7.70   36.30
  19   0 -14  -11.50   30.60
[truncated: 78,475 more chars]
